# Supplementary material
Source: MDPI journal article supplement (https://www.mdpi.com/2304-6740/11/10/417)
Supplement: s1 [file s1]

Archive with 5 entries (5 files):
- 2298037.cif
- 2298037.pdf
- 2298038.cif
- 2298038.pdf
- Supplementary data.pdf
