# Supplementary material
Source: MDPI journal article supplement (https://www.mdpi.com/2304-6740/11/10/417)
Supplement: s1 [file s1 › 2298037.cif]

 
data_pna21
 
_audit_creation_method            'SHELXL-2014/7'
_shelx_SHELXL_version_number      '2014/7'
_chemical_name_systematic         ?
_chemical_name_common             ?
_chemical_melting_point           ?
_chemical_formula_moiety          ?
_chemical_formula_sum
 'C13 H9 Ag N2 O S' 
_chemical_formula_weight          349.15

loop_
 _atom_type_symbol
 _atom_type_description
 _atom_type_scat_dispersion_real
 _atom_type_scat_dispersion_imag
 _atom_type_scat_source
 'C'  'C'   0.0033   0.0016
 'International Tables Vol C Tables 4.2.6.8 and 6.1.1.4'
 'H'  'H'   0.0000   0.0000
 'International Tables Vol C Tables 4.2.6.8 and 6.1.1.4'
 'N'  'N'   0.0061   0.0033
 'International Tables Vol C Tables 4.2.6.8 and 6.1.1.4'
 'O'  'O'   0.0106   0.0060
 'International Tables Vol C Tables 4.2.6.8 and 6.1.1.4'
 'Ag'  'Ag'  -0.8971   1.1015
 'International Tables Vol C Tables 4.2.6.8 and 6.1.1.4'
 'S'  'S'   0.1246   0.1234
 'International Tables Vol C Tables 4.2.6.8 and 6.1.1.4'
 
_space_group_crystal_system       orthorhombic
_space_group_IT_number            33
_space_group_name_H-M_alt         'P n a 21'
_space_group_name_Hall            'P 2c -2n'
 
_shelx_space_group_comment
;
The symmetry employed for this shelxl refinement is uniquely defined
by the following loop, which should always be used as a source of
symmetry information in preference to the above space-group names.
They are only intended as comments.
;
 
loop_
 _space_group_symop_operation_xyz
 'x, y, z'
 '-x, -y, z+1/2'
 'x+1/2, -y+1/2, z'
 '-x+1/2, y+1/2, z+1/2'
 
_cell_length_a                    27.2079(9)
_cell_length_b                    6.0833(2)
_cell_length_c                    7.5732(2)
_cell_angle_alpha                 90
_cell_angle_beta                  90
_cell_angle_gamma                 90
_cell_volume                      1253.47(7)
_cell_formula_units_Z             4
_cell_measurement_temperature     100(2)
_cell_measurement_reflns_used    7479
_cell_measurement_theta_min        2.99
_cell_measurement_theta_max       30.52
 
_exptl_crystal_description       'block'
_exptl_crystal_colour            'Pale yellow'
_exptl_crystal_density_meas       ?
_exptl_crystal_density_method     ?
_exptl_crystal_density_diffrn     1.850          
_exptl_crystal_F_000              688
_exptl_transmission_factor_min    ?
_exptl_transmission_factor_max    ?
_exptl_crystal_size_max           0.214
_exptl_crystal_size_mid           0.157
_exptl_crystal_size_min           0.102
_exptl_absorpt_coefficient_mu     1.761
_shelx_estimated_absorpt_T_min    0.704
_shelx_estimated_absorpt_T_max    0.841
_exptl_absorpt_correction_type    multi-scan
_exptl_absorpt_correction_T_min   0.8039  
_exptl_absorpt_correction_T_max   1.000
_exptl_absorpt_process_details    'SADABS (Sheldrick, 2008)' 
_exptl_absorpt_special_details    ?
_diffrn_ambient_temperature       100(2)
_diffrn_radiation_wavelength      0.71073
_diffrn_radiation_type            MoK\a
_diffrn_radiation_source         'sealed tube'
_diffrn_radiation_monochromator  'graphite'
_diffrn_measurement_device_type  'Bruker APEX-II CCD'
_diffrn_measurement_method       '\f and \w scans'
_diffrn_detector_area_resol_mean  ?
_diffrn_reflns_number             12897
_diffrn_reflns_av_unetI/netI      0.0285
_diffrn_reflns_av_R_equivalents   0.0273
_diffrn_reflns_limit_h_min        -36
_diffrn_reflns_limit_h_max        38
_diffrn_reflns_limit_k_min        -7
_diffrn_reflns_limit_k_max        8
_diffrn_reflns_limit_l_min        -10
_diffrn_reflns_limit_l_max        10
_diffrn_reflns_theta_min          2.995
_diffrn_reflns_theta_max          30.570
_diffrn_reflns_theta_full         25.242
_diffrn_measured_fraction_theta_max   0.998
_diffrn_measured_fraction_theta_full  0.999
_diffrn_reflns_Laue_measured_fraction_max    0.998
_diffrn_reflns_Laue_measured_fraction_full   0.999
_diffrn_reflns_point_group_measured_fraction_max   0.980
_diffrn_reflns_point_group_measured_fraction_full  0.993
_reflns_number_total              3773
_reflns_number_gt                 3607
_reflns_threshold_expression      'I > 2\s(I)'
_reflns_Friedel_coverage          0.838
_reflns_Friedel_fraction_max      0.959
_reflns_Friedel_fraction_full     0.986
 
_reflns_special_details
;
 Reflections were merged by SHELXL according to the crystal
 class for the calculation of statistics and refinement.
 
 _reflns_Friedel_fraction is defined as the number of unique
 Friedel pairs measured divided by the number that would be
 possible theoretically, ignoring centric projections and
 systematic absences.
;
 
_computing_data_collection      'Bruker APEX2'
_computing_cell_refinement      'Bruker SAINT'
_computing_data_reduction       'Bruker SAINT'  
_computing_structure_solution   'SHELXS-97 (Sheldrick, 2008)'
_computing_structure_refinement 'SHELXL-97 (Sheldrick, 2008)'
_computing_molecular_graphics   'Bruker SHELXTL'
_computing_publication_material 'Bruker SHELXTL'
_refine_special_details           ?
_refine_ls_structure_factor_coef  Fsqd
_refine_ls_matrix_type            full
_refine_ls_weighting_scheme       calc
_refine_ls_weighting_details
'w=1/[\s^2^(Fo^2^)+(0.0401P)^2^] where P=(Fo^2^+2Fc^2^)/3'
_atom_sites_solution_primary      ?
_atom_sites_solution_secondary    ?
_atom_sites_solution_hydrogens    geom
_refine_ls_hydrogen_treatment     constr
_refine_ls_extinction_method      none
_refine_ls_extinction_coef        .
_refine_ls_abs_structure_details
;
 Flack x determined using 1551 quotients [(I+)-(I-)]/[(I+)+(I-)]
 (Parsons, Flack and Wagner, Acta Cryst. B69 (2013) 249-259).
;
_refine_ls_abs_structure_Flack    0.008(13)
_chemical_absolute_configuration  ?
_refine_ls_number_reflns          3773
_refine_ls_number_parameters      163
_refine_ls_number_restraints      1
_refine_ls_R_factor_all           0.0244
_refine_ls_R_factor_gt            0.0228
_refine_ls_wR_factor_ref          0.0589
_refine_ls_wR_factor_gt           0.0580
_refine_ls_goodness_of_fit_ref    0.971
_refine_ls_restrained_S_all       0.971
_refine_ls_shift/su_max           0.002
_refine_ls_shift/su_mean          0.000
 
loop_
 _atom_site_label
 _atom_site_type_symbol
 _atom_site_fract_x
 _atom_site_fract_y
 _atom_site_fract_z
 _atom_site_U_iso_or_equiv
 _atom_site_adp_type
 _atom_site_occupancy
 _atom_site_site_symmetry_order  
 _atom_site_calc_flag
 _atom_site_refinement_flags_posn
 _atom_site_refinement_flags_adp
 _atom_site_refinement_flags_occupancy
 _atom_site_disorder_assembly
 _atom_site_disorder_group
Ag1 Ag 0.46176(2) 0.71946(3) 0.34911(5) 0.02170(7) Uani 1 1 d . . . . .
S1 S 0.51735(3) 0.54895(12) 0.59029(10) 0.02345(16) Uani 1 1 d . . . . .
N1 N 0.47255(11) 1.0668(5) 0.2934(4) 0.0259(6) Uani 1 1 d . . . . .
N2 N 0.38489(9) 0.5635(4) 0.4018(3) 0.0176(5) Uani 1 1 d . . . . .
O1 O 0.25002(8) 0.0198(4) 0.3960(4) 0.0296(6) Uani 1 1 d . . . . .
C1 C 0.52321(13) 0.7753(5) 0.7104(4) 0.0199(6) Uani 1 1 d . . . . .
C2 C 0.37983(11) 0.3679(5) 0.4804(4) 0.0186(6) Uani 1 1 d . . . . .
H2 H 0.4078 0.3040 0.5351 0.022 Uiso 1 1 calc R U . . .
C3 C 0.33579(12) 0.2542(5) 0.4856(4) 0.0176(6) Uani 1 1 d . . . . .
H3 H 0.3337 0.1149 0.5417 0.021 Uiso 1 1 calc R U . . .
C4 C 0.29410(10) 0.3491(5) 0.4063(4) 0.0152(5) Uani 1 1 d . . . . .
C5 C 0.29923(10) 0.5537(4) 0.3264(4) 0.0178(5) Uani 1 1 d . . . . .
H5 H 0.2717 0.6238 0.2736 0.021 Uiso 1 1 calc R U . . .
C6 C 0.34513(10) 0.6546(5) 0.3247(4) 0.0178(5) Uani 1 1 d . . . . .
H6 H 0.3486 0.7925 0.2672 0.021 Uiso 1 1 calc R U . . .
C7 C 0.24726(12) 0.2192(5) 0.4008(4) 0.0191(6) Uani 1 1 d . . . . .
C8 C 0.19871(11) 0.3323(5) 0.3972(4) 0.0161(5) Uani 1 1 d . . . . .
C9 C 0.15920(11) 0.2158(5) 0.3246(5) 0.0213(7) Uani 1 1 d . . . . .
H9 H 0.1643 0.0744 0.2747 0.026 Uiso 1 1 calc R U . . .
C10 C 0.11242(11) 0.3079(5) 0.3259(6) 0.0258(7) Uani 1 1 d . . . . .
H10 H 0.0856 0.2298 0.2756 0.031 Uiso 1 1 calc R U . . .
C11 C 0.10478(11) 0.5129(6) 0.4000(4) 0.0259(7) Uani 1 1 d . . . . .
H11 H 0.0727 0.5749 0.4007 0.031 Uiso 1 1 calc R U . . .
C12 C 0.14380(12) 0.6284(5) 0.4734(4) 0.0232(6) Uani 1 1 d . . . . .
H12 H 0.1382 0.7682 0.5256 0.028 Uiso 1 1 calc R U . . .
C13 C 0.19089(11) 0.5408(5) 0.4709(4) 0.0176(5) Uani 1 1 d . . . . .
H13 H 0.2176 0.6215 0.5188 0.021 Uiso 1 1 calc R U . . .
 
loop_
 _atom_site_aniso_label
 _atom_site_aniso_U_11
 _atom_site_aniso_U_22
 _atom_site_aniso_U_33
 _atom_site_aniso_U_23
 _atom_site_aniso_U_13
 _atom_site_aniso_U_12
Ag1 0.02346(11) 0.01574(10) 0.02589(11) 0.00071(14) -0.00190(12) -0.00374(6)
S1 0.0365(4) 0.0146(3) 0.0193(3) -0.0005(3) -0.0077(3) 0.0041(3)
N1 0.0330(13) 0.0166(12) 0.0281(13) 0.0007(10) 0.0051(11) -0.0002(10)
N2 0.0170(11) 0.0172(11) 0.0187(10) -0.0011(8) 0.0024(9) 0.0006(9)
O1 0.0270(11) 0.0133(10) 0.0483(15) -0.0017(9) 0.0018(10) 0.0000(8)
C1 0.0213(14) 0.0177(14) 0.0207(15) 0.0034(10) -0.0015(13) 0.0021(11)
C2 0.0153(13) 0.0196(14) 0.0209(13) 0.0004(11) 0.0016(10) 0.0030(10)
C3 0.0209(15) 0.0132(12) 0.0186(14) 0.0017(10) 0.0019(12) 0.0027(10)
C4 0.0188(13) 0.0122(11) 0.0146(11) -0.0017(9) 0.0026(10) -0.0011(10)
C5 0.0180(11) 0.0165(11) 0.0188(15) 0.0019(11) -0.0011(11) 0.0010(8)
C6 0.0209(12) 0.0170(11) 0.0154(15) 0.0001(10) 0.0001(11) -0.0005(9)
C7 0.0183(14) 0.0159(13) 0.0231(14) -0.0023(10) 0.0026(11) -0.0015(10)
C8 0.0168(12) 0.0155(12) 0.0161(12) -0.0005(9) 0.0019(9) -0.0008(10)
C9 0.0223(13) 0.0218(13) 0.0199(19) -0.0034(11) 0.0002(13) -0.0033(9)
C10 0.0174(12) 0.0328(16) 0.027(2) -0.0053(14) 0.0001(13) -0.0052(11)
C11 0.0187(13) 0.0321(17) 0.0269(15) 0.0007(12) 0.0027(11) 0.0021(12)
C12 0.0241(15) 0.0212(15) 0.0243(14) -0.0008(11) 0.0024(12) 0.0021(12)
C13 0.0197(14) 0.0160(13) 0.0171(12) -0.0004(10) 0.0019(11) -0.0019(10)
 
_geom_special_details
;
 All esds (except the esd in the dihedral angle between two l.s. planes)
 are estimated using the full covariance matrix.  The cell esds are taken
 into account individually in the estimation of esds in distances, angles
 and torsion angles; correlations between esds in cell parameters are only
 used when they are defined by crystal symmetry.  An approximate (isotropic)
 treatment of cell esds is used for estimating esds involving l.s. planes.
;
 
loop_
 _geom_bond_atom_site_label_1
 _geom_bond_atom_site_label_2
 _geom_bond_distance
 _geom_bond_site_symmetry_2
 _geom_bond_publ_flag
Ag1 N1 2.175(3) . ?
Ag1 N2 2.331(2) . ?
Ag1 S1 2.5885(8) . ?
Ag1 S1 2.6136(8) 2_664 ?
S1 C1 1.658(3) . ?
S1 Ag1 2.6136(8) 2_665 ?
N1 C1 1.153(4) 2_674 ?
N2 C2 1.337(4) . ?
N2 C6 1.348(4) . ?
O1 C7 1.216(4) . ?
C1 N1 1.153(4) 2_675 ?
C2 C3 1.384(4) . ?
C2 H2 0.9500 . ?
C3 C4 1.407(4) . ?
C3 H3 0.9500 . ?
C4 C5 1.391(4) . ?
C4 C7 1.500(4) . ?
C5 C6 1.391(4) . ?
C5 H5 0.9500 . ?
C6 H6 0.9500 . ?
C7 C8 1.490(4) . ?
C8 C9 1.400(4) . ?
C8 C13 1.402(4) . ?
C9 C10 1.391(4) . ?
C9 H9 0.9500 . ?
C10 C11 1.383(5) . ?
C10 H10 0.9500 . ?
C11 C12 1.389(5) . ?
C11 H11 0.9500 . ?
C12 C13 1.388(4) . ?
C12 H12 0.9500 . ?
C13 H13 0.9500 . ?
 
loop_
 _geom_angle_atom_site_label_1
 _geom_angle_atom_site_label_2
 _geom_angle_atom_site_label_3
 _geom_angle
 _geom_angle_site_symmetry_1
 _geom_angle_site_symmetry_3
 _geom_angle_publ_flag
N1 Ag1 N2 123.35(10) . . ?
N1 Ag1 S1 116.58(8) . . ?
N2 Ag1 S1 103.91(7) . . ?
N1 Ag1 S1 115.60(8) . 2_664 ?
N2 Ag1 S1 93.98(6) . 2_664 ?
S1 Ag1 S1 98.727(10) . 2_664 ?
C1 S1 Ag1 96.34(12) . . ?
C1 S1 Ag1 94.97(11) . 2_665 ?
Ag1 S1 Ag1 155.04(4) . 2_665 ?
C1 N1 Ag1 158.2(3) 2_674 . ?
C2 N2 C6 118.4(2) . . ?
C2 N2 Ag1 122.0(2) . . ?
C6 N2 Ag1 118.59(19) . . ?
N1 C1 S1 179.7(4) 2_675 . ?
N2 C2 C3 123.1(3) . . ?
N2 C2 H2 118.4 . . ?
C3 C2 H2 118.4 . . ?
C2 C3 C4 118.7(3) . . ?
C2 C3 H3 120.6 . . ?
C4 C3 H3 120.6 . . ?
C5 C4 C3 118.2(3) . . ?
C5 C4 C7 123.0(3) . . ?
C3 C4 C7 118.7(3) . . ?
C4 C5 C6 119.3(3) . . ?
C4 C5 H5 120.4 . . ?
C6 C5 H5 120.4 . . ?
N2 C6 C5 122.3(3) . . ?
N2 C6 H6 118.8 . . ?
C5 C6 H6 118.8 . . ?
O1 C7 C8 121.0(3) . . ?
O1 C7 C4 118.3(3) . . ?
C8 C7 C4 120.7(3) . . ?
C9 C8 C13 119.9(3) . . ?
C9 C8 C7 117.0(3) . . ?
C13 C8 C7 123.0(3) . . ?
C10 C9 C8 119.7(3) . . ?
C10 C9 H9 120.1 . . ?
C8 C9 H9 120.1 . . ?
C11 C10 C9 120.2(3) . . ?
C11 C10 H10 119.9 . . ?
C9 C10 H10 119.9 . . ?
C10 C11 C12 120.2(3) . . ?
C10 C11 H11 119.9 . . ?
C12 C11 H11 119.9 . . ?
C13 C12 C11 120.4(3) . . ?
C13 C12 H12 119.8 . . ?
C11 C12 H12 119.8 . . ?
C12 C13 C8 119.5(3) . . ?
C12 C13 H13 120.2 . . ?
C8 C13 H13 120.2 . . ?
 
loop_
 _geom_torsion_atom_site_label_1
 _geom_torsion_atom_site_label_2
 _geom_torsion_atom_site_label_3
 _geom_torsion_atom_site_label_4
 _geom_torsion
 _geom_torsion_site_symmetry_1
 _geom_torsion_site_symmetry_2
 _geom_torsion_site_symmetry_3
 _geom_torsion_site_symmetry_4
 _geom_torsion_publ_flag
C6 N2 C2 C3 0.3(4) . . . . ?
Ag1 N2 C2 C3 -168.3(2) . . . . ?
N2 C2 C3 C4 -0.6(5) . . . . ?
C2 C3 C4 C5 -0.1(4) . . . . ?
C2 C3 C4 C7 175.8(3) . . . . ?
C3 C4 C5 C6 1.2(4) . . . . ?
C7 C4 C5 C6 -174.5(3) . . . . ?
C2 N2 C6 C5 0.9(4) . . . . ?
Ag1 N2 C6 C5 169.9(2) . . . . ?
C4 C5 C6 N2 -1.7(4) . . . . ?
C5 C4 C7 O1 146.5(3) . . . . ?
C3 C4 C7 O1 -29.2(4) . . . . ?
C5 C4 C7 C8 -32.2(4) . . . . ?
C3 C4 C7 C8 152.1(3) . . . . ?
O1 C7 C8 C9 -23.0(5) . . . . ?
C4 C7 C8 C9 155.7(3) . . . . ?
O1 C7 C8 C13 153.5(3) . . . . ?
C4 C7 C8 C13 -27.9(4) . . . . ?
C13 C8 C9 C10 0.1(5) . . . . ?
C7 C8 C9 C10 176.6(3) . . . . ?
C8 C9 C10 C11 -0.6(5) . . . . ?
C9 C10 C11 C12 0.1(5) . . . . ?
C10 C11 C12 C13 0.9(5) . . . . ?
C11 C12 C13 C8 -1.4(4) . . . . ?
C9 C8 C13 C12 0.9(4) . . . . ?
C7 C8 C13 C12 -175.4(3) . . . . ?
 
_refine_diff_density_max    0.549
_refine_diff_density_min   -0.778
_refine_diff_density_rms    0.071

_shelx_res_file
;

    pna21.res created by SHELXL-2014/7


TITL pna21 in Pna2(1)
CELL 0.71073  27.2079   6.0833   7.5732  90.000  90.000  90.000
ZERR    4.00   0.0009   0.0002   0.0002   0.000   0.000   0.000
LATT -1
SYMM -X, -Y, 0.5+Z
SYMM 0.5+X, 0.5-Y, Z
SYMM 0.5-X, 0.5+Y, 0.5+Z
SFAC C  H  N  O  Ag S
UNIT 52 36 8 4 4 4
LIST 4 ! automatically inserted. Change 6 to 4 for CHECKCIF!!
L.S. 50
OMIT 2   0   0
ACTA
BOND 0.5 $H
FMAP 2
PLAN 5
SIZE 0.102 0.157 0.214
CONF
TEMP -173.140
WGHT    0.040100
FVAR       0.10883
MOLE 1
AG1   5    0.461756    0.719462    0.349106    11.00000    0.02346    0.01574 =
         0.02589    0.00071   -0.00190   -0.00374
S1    6    0.517353    0.548951    0.590292    11.00000    0.03646    0.01462 =
         0.01927   -0.00050   -0.00767    0.00412
N1    3    0.472551    1.066834    0.293359    11.00000    0.03296    0.01656 =
         0.02810    0.00075    0.00506   -0.00025
N2    3    0.384889    0.563537    0.401826    11.00000    0.01701    0.01721 =
         0.01869   -0.00109    0.00240    0.00059
O1    4    0.250022    0.019831    0.396014    11.00000    0.02703    0.01332 =
         0.04833   -0.00170    0.00183   -0.00002
C1    1    0.523209    0.775344    0.710407    11.00000    0.02133    0.01772 =
         0.02068    0.00343   -0.00150    0.00213
C2    1    0.379834    0.367937    0.480367    11.00000    0.01533    0.01962 =
         0.02090    0.00039    0.00162    0.00296
AFIX  43
H2    2    0.407802    0.303986    0.535147    11.00000   -1.20000
AFIX   0
C3    1    0.335792    0.254236    0.485639    11.00000    0.02091    0.01318 =
         0.01864    0.00169    0.00194    0.00266
AFIX  43
H3    2    0.333744    0.114855    0.541733    11.00000   -1.20000
AFIX   0
C4    1    0.294103    0.349126    0.406282    11.00000    0.01882    0.01217 =
         0.01460   -0.00170    0.00259   -0.00108
C5    1    0.299233    0.553711    0.326415    11.00000    0.01798    0.01645 =
         0.01884    0.00189   -0.00111    0.00103
AFIX  43
H5    2    0.271710    0.623795    0.273600    11.00000   -1.20000
AFIX   0
C6    1    0.345129    0.654597    0.324731    11.00000    0.02093    0.01695 =
         0.01541    0.00008    0.00010   -0.00047
AFIX  43
H6    2    0.348572    0.792528    0.267223    11.00000   -1.20000
AFIX   0
C7    1    0.247265    0.219249    0.400774    11.00000    0.01831    0.01590 =
         0.02314   -0.00235    0.00256   -0.00149
C8    1    0.198712    0.332350    0.397190    11.00000    0.01677    0.01545 =
         0.01613   -0.00049    0.00186   -0.00084
C9    1    0.159196    0.215790    0.324590    11.00000    0.02229    0.02184 =
         0.01991   -0.00343    0.00016   -0.00330
AFIX  43
H9    2    0.164323    0.074366    0.274677    11.00000   -1.20000
AFIX   0
C10   1    0.112422    0.307902    0.325856    11.00000    0.01736    0.03277 =
         0.02730   -0.00527    0.00007   -0.00519
AFIX  43
H10   2    0.085617    0.229756    0.275642    11.00000   -1.20000
AFIX   0
C11   1    0.104784    0.512873    0.399954    11.00000    0.01870    0.03206 =
         0.02694    0.00074    0.00272    0.00207
AFIX  43
H11   2    0.072739    0.574885    0.400658    11.00000   -1.20000
AFIX   0
C12   1    0.143804    0.628412    0.473361    11.00000    0.02409    0.02123 =
         0.02435   -0.00078    0.00240    0.00207
AFIX  43
H12   2    0.138218    0.768204    0.525552    11.00000   -1.20000
AFIX   0
C13   1    0.190890    0.540804    0.470889    11.00000    0.01968    0.01604 =
         0.01712   -0.00036    0.00188   -0.00186
AFIX  43
H13   2    0.217637    0.621539    0.518808    11.00000   -1.20000
AFIX   0
HKLF 4

REM  pna21 in Pna2(1)
REM R1 =  0.0228 for    3607 Fo > 4sig(Fo)  and  0.0244 for all    3773 data
REM    163 parameters refined using      1 restraints

END

WGHT      0.0246      0.3073

REM Highest difference peak  0.549,  deepest hole -0.778,  1-sigma level  0.071
Q1    1   0.4621  0.6203  0.4100  11.00000  0.05    0.55
Q2    1   0.4614  0.6212  0.2866  11.00000  0.05    0.50
Q3    1   0.2991  0.4492  0.3504  11.00000  0.05    0.43
Q4    1   0.4594  0.8270  0.2740  11.00000  0.05    0.41
Q5    1   0.4913  0.6894  0.3394  11.00000  0.05    0.41
;
_shelx_res_checksum   69895

_shelx_hkl_file
;
   0  -1   0    0.29    0.04
   0  -1   0    0.05    0.03
   0  -1   0    0.34    0.04
   0   1   0    0.10    0.03
   0   1   0    0.05    0.03
   0   1   0    0.17    0.03
   0   2   0  135.80    4.17
   0  -2   0  141.29    4.28
   0   2   0  136.16    4.29
   0   2   0  134.73    4.29
   0   3   0    0.04    0.06
   0   3   0    0.06    0.07
   0   4   0  122.68    3.86
   0   4   0  123.03    4.00
   0   5   0    0.09    0.10
   0   6   0   11.89    0.63
   0   7   0    0.21    0.16
   0   8   0    1.01    0.28
   0   0  -1    0.03    0.02
   0   0   1    0.09    0.02
   0   0   1    0.08    0.02
   0   1   1   83.21    2.58
   0   1  -1   78.78    2.51
   0   1  -1   79.39    2.51
   0   1   1   76.84    2.45
   0  -1   1   82.67    2.51
   0   2  -1    0.00    0.04
   0   2   1    0.10    0.05
   0   2  -1    0.08    0.05
   0   2  -1    0.03    0.04
   0   3  -1   56.62    1.85
   0   3   1   51.53    1.81
   0   3  -1   58.83    1.82
   0   4  -1    0.04    0.08
   0   4  -1    0.19    0.09
   0   4  -1    0.10    0.09
   0   4   1    0.07    0.08
   0   5  -1   43.56    1.55
   0   5  -1   40.89    1.62
   0   5   1   45.54    1.57
   0   6  -1    0.28    0.18
   0   6   1    0.38    0.16
   0   6  -1    0.00    0.12
   0   7   1    3.66    0.38
   0   7  -1    4.33    0.40
   0   8  -1    0.05    0.19
   0   8   1    0.03    0.18
   0   0   2 1000.00   29.91
   0   0   2  980.42   32.85
   0   0  -2  888.03   32.76
   0  -1   2    0.13    0.05
   0   1   2    0.06    0.04
   0   1  -2    0.10    0.04
   0  -1   2    0.09    0.04
   0   1   2    0.09    0.05
   0   2   2  242.65    7.53
   0   2  -2  245.79    7.71
   0   2  -2  257.46    7.72
   0   2   2  250.72    7.91
   0   3  -2    0.08    0.06
   0   3  -2    0.10    0.07
   0   3   2    0.17    0.08
   0   3  -2    0.02    0.06
   0   4   2   59.08    1.98
   0   4  -2   59.31    2.05
   0   4  -2   57.10    1.96
   0   4  -2   59.00    1.99
   0   5  -2    0.15    0.11
   0   5  -2    0.15    0.13
   0   5  -2    0.09    0.12
   0   5   2    0.09    0.11
   0   6  -2    2.92    0.30
   0   6  -2    2.93    0.35
   0   6   2    2.46    0.31
   0   7  -2    0.01    0.17
   0   7  -2   -0.05    0.14
   0   7   2    0.00    0.15
   0   8   2    1.54    0.31
   0   8  -2    0.88    0.26
   0   0   3    0.04    0.05
   0   0  -3    0.04    0.05
   0   0   3    0.02    0.04
   0  -1  -3  181.35    6.32
   0   1   3  179.92    5.51
   0  -1   3  181.92    6.29
   0   1   3  180.89    5.80
   0   1  -3  180.24    5.63
   0   1  -3  180.71    6.29
   0   2  -3    0.22    0.08
   0  -2   3    0.15    0.07
   0   2   3    0.12    0.07
   0   2   3    0.01    0.07
   0   3  -3   96.45    3.05
   0   3   3   92.23    3.03
   0   3   3   97.47    3.20
   0  -3   3   97.25    3.43
   0   3  -3   91.74    3.10
   0   4   3    0.04    0.10
   0   4  -3    0.14    0.09
   0   4  -3    0.07    0.10
   0   4  -3    0.12    0.10
   0   5   3   21.19    0.89
   0   5  -3   20.53    0.85
   0   5  -3   19.42    0.92
   0   5  -3   20.31    0.87
   0   6   3    0.15    0.15
   0   6  -3    0.16    0.16
   0   6  -3    0.00    0.12
   0   7  -3    9.02    0.64
   0   7  -3    7.74    0.53
   0   7   3    8.05    0.57
   0   8  -3    0.14    0.21
   0   8   3    0.23    0.21
   0   0   4  277.93    8.60
   0   0  -4  262.13    9.35
   0  -1  -4    0.05    0.07
   0   1  -4    0.11    0.07
   0   1   4    0.08    0.07
   0  -1   4    0.27    0.08
   0   1  -4   -0.02    0.05
   0   1   4    0.05    0.07
   0  -2   4   49.97    1.83
   0   2  -4   49.07    1.68
   0   2   4   46.89    1.64
   0   2   4   47.89    1.74
   0  -3   4   -0.03    0.09
   0   3  -4    0.13    0.09
   0   3   4    0.10    0.10
   0   3   4    0.00    0.08
   0   3  -4    0.07    0.08
   0   4  -4   54.74    1.87
   0  -4   4   60.52    2.17
   0   4  -4   51.45    1.89
   0   4  -4   53.02    1.96
   0   4   4   55.82    1.93
   0   5   4    0.21    0.14
   0   5  -4    0.14    0.14
   0   5  -4    0.14    0.12
   0   5  -4    0.15    0.13
   0   6   4    5.91    0.47
   0   6  -4    6.81    0.47
   0   6  -4    6.71    0.52
   0   6  -4    6.67    0.45
   0   7   4    0.18    0.19
   0   7  -4    0.39    0.23
   0   7  -4    0.27    0.18
   0   8  -4    4.95    0.57
   0   8   4    5.40    0.52
   0   8  -4    5.41    0.51
   0   0  -5    0.05    0.07
   0   0   5    0.01    0.07
   0  -1  -5  102.40    3.85
   0   1   5  104.75    3.56
   0   1  -5  108.14    3.82
   0   1  -5  108.73    3.46
   0  -1   5  103.94    3.54
   0  -1   5  108.87    3.82
   0   2  -5   -0.11    0.05
   0  -2   5    0.04    0.09
   0   2   5    0.04    0.10
   0   2  -5   -0.04    0.06
   0  -2  -5    0.02    0.08
   0   2   5    0.09    0.10
   0  -3   5   46.21    1.84
   0   3   5   46.40    1.78
   0   3   5   45.00    1.67
   0   3  -5   49.66    1.62
   0   3  -5   47.60    1.71
   0   4  -5    0.07    0.12
   0   4   5    0.23    0.15
   0   4   5    0.11    0.13
   0   4  -5   -0.06    0.10
   0  -4   5    0.22    0.15
   0   5  -5   26.21    1.03
   0   5  -5   25.46    1.08
   0   5  -5   24.55    1.13
   0   5   5   27.05    1.12
   0   6   5    0.22    0.18
   0   6  -5    0.24    0.17
   0   6  -5    0.21    0.18
   0   7   5    0.38    0.23
   0   7  -5    0.69    0.27
   0   7  -5    0.92    0.25
   0   0   6   38.85    1.49
   0   0  -6   38.77    1.56
   0   1  -6    0.08    0.09
   0  -1  -6    0.13    0.11
   0   1   6    0.13    0.12
   0  -1   6    0.06    0.11
   0  -1   6   -0.01    0.08
   0   1  -6    0.00    0.08
   0   2   6  107.74    3.87
   0   2  -6  112.42    3.75
   0  -2   6  124.12    4.15
   0  -2  -6  110.47    4.20
   0   3   6    0.24    0.14
   0  -3  -6   -0.02    0.11
   0  -3   6    0.04    0.13
   0   3  -6    0.16    0.11
   0   3   6    0.17    0.13
   0   3  -6    0.15    0.11
   0   4   6   17.32    0.85
   0   4  -6   17.85    0.87
   0   4   6   20.25    0.97
   0   4  -6   18.09    0.74
   0   4  -6   18.44    0.77
   0   5   6    0.27    0.16
   0   5  -6    0.29    0.16
   0   5  -6    0.11    0.17
   0   6  -6    3.69    0.44
   0   6   6    3.33    0.40
   0   6  -6    4.23    0.42
   0   7  -6   -0.13    0.18
   0   7  -6    0.15    0.25
   0   7   6    0.29    0.23
   0   0  -7    0.10    0.11
   0   0   7    0.01    0.10
   0   1  -7   40.42    1.59
   0  -1  -7   39.40    1.63
   0  -1   7   35.78    1.51
   0   1  -7   40.86    1.50
   0   1   7   36.40    1.54
   0  -2   7    0.35    0.16
   0   2  -7   -0.06    0.08
   0  -2   7   -0.08    0.10
   0  -2  -7    0.10    0.13
   0   2   7    0.00    0.11
   0   3  -7   23.74    0.90
   0   3  -7   20.08    0.97
   0   3   7   21.80    1.06
   0  -3  -7   19.99    1.10
   0   4   7    0.11    0.16
   0  -4  -7    0.15    0.19
   0   4  -7    0.21    0.17
   0   4   7    0.11    0.18
   0   5  -7    2.25    0.32
   0   5  -7    2.38    0.36
   0   5   7    2.45    0.33
   0   6  -7    0.11    0.20
   0   6   7   -0.07    0.19
   0   6  -7    0.35    0.20
   0   0  -8   53.35    2.09
   0   0  -8   50.91    1.93
   0   0   8   49.46    1.99
   0   1   8    0.25    0.17
   0  -1  -8    0.07    0.15
   0   1  -8    0.10    0.13
   0   1  -8    0.05    0.13
   0  -1   8    0.06    0.15
   0  -2  -8   18.63    0.99
   0  -2   8   18.44    0.93
   0   2   8   17.04    0.93
   0   2  -8   18.69    0.90
   0  -3   8   -0.11    0.15
   0   3  -8   -0.09    0.13
   0   3   8    0.15    0.17
   0  -3  -8    0.00    0.18
   0  -4  -8   13.49    0.92
   0   4  -8   13.79    0.79
   0  -4   8   13.48    0.78
   0   4   8   12.67    0.83
   0   5  -8   -0.08    0.19
   0   0  -9    0.06    0.14
   0   0   9   -0.11    0.14
   0   1   9   31.12    1.42
   0  -1   9   29.00    1.37
   0   1  -9   31.53    1.34
   0   2   9   -0.19    0.15
   0  -2  -9    0.10    0.21
   0   2  -9    0.01    0.15
   0  -2   9   -0.21    0.15
   0  -3  -9    6.45    0.61
   0   3   9    5.61    0.56
   0   3  -9    7.32    0.57
   0  -3   9    5.91    0.53
   0  -4   9    0.24    0.22
   0   4  -9   -0.46    0.18
   0   4   9    0.25    0.23
   0   0  10    0.25    0.21
   0   0 -10   -0.04    0.18
   0   1 -10    0.16    0.19
   0  -1  10   -0.02    0.19
   0   1  10    0.00    0.20
   0  -2  10   13.25    0.86
   0   2 -10   16.37    0.89
   0   2  10   13.57    0.91
   0  -3  10    0.00    0.21
   0   3 -10    0.46    0.26
   0   3  10    0.20    0.22
   1   1   0   51.42    1.67
  -1   1   0   52.62    1.62
  -1  -1   0   53.01    1.67
  -1   1   0   51.93    1.67
  -1  -1   0   53.90    1.62
   1  -1   0   53.70    1.62
   1  -1   0   52.39    1.66
   1   1   0   52.54    1.67
   1  -1   0   54.61    1.67
   1   1   0   50.50    1.62
  -1   2   0   23.81    0.86
   1  -2   0   25.94    0.87
  -1   2   0   24.72    0.82
   1   2   0   23.80    0.86
  -1  -2   0   25.47    0.87
   1   2   0   23.86    0.86
   1   2   0   23.79    0.83
  -1   3   0   36.34    1.22
   1   3   0   36.88    1.28
   1   3   0   35.73    1.26
   1   3   0   35.38    1.22
  -1   3   0   35.23    1.27
   1   4   0    3.36    0.26
   1   4   0    3.63    0.29
  -1   4   0    3.34    0.25
  -1   5   0   42.45    1.51
   1   5   0   42.37    1.53
  -1   6   0   13.20    0.68
   1   6   0   14.71    0.72
  -1   7   0   38.72    1.52
   1   7   0   39.35    1.55
  -1   8   0    1.47    0.30
   1   8   0    1.83    0.33
   1   0  -1    0.05    0.02
  -1   0  -1    0.05    0.02
  -1   0   1    0.01    0.01
   1   0   1    0.03    0.02
   1   0   1    0.01    0.01
   1   0   1    0.05    0.01
  -1   0   1    0.02    0.01
  -1   0  -1    0.01    0.01
   1   0  -1    0.04    0.02
   1   1  -1   72.07    2.31
   1   1  -1   72.33    2.32
  -1  -1  -1   74.68    2.25
  -1   1   1   72.30    2.25
   1  -1   1   75.14    2.31
  -1   1   1   74.11    2.37
  -1   1  -1   73.90    2.31
  -1  -1   1   75.91    2.32
   1   1   1   72.14    2.26
   1   1   1   73.46    2.37
  -1   1  -1   72.93    2.31
   1   2  -1   70.37    2.20
   1   2  -1   70.25    2.25
   1  -2   1   72.97    2.25
   1   2  -1   69.98    2.26
  -1   2   1   66.69    2.19
  -1   2  -1   69.95    2.19
   1   2   1   68.38    2.20
  -1   2  -1   71.72    2.26
  -1   2  -1   70.57    2.23
   1   3  -1   27.01    0.99
  -1   3   1   27.82    0.98
   1   3  -1   28.38    0.98
   1   3  -1   26.50    1.02
   1   3   1   27.05    0.98
  -1   3  -1   28.40    0.98
  -1   3  -1   28.16    1.02
  -1   3  -1   27.58    0.97
   1   4  -1   54.99    1.90
  -1   4   1   52.44    1.80
   1   4  -1   54.65    1.82
   1   4  -1   53.46    1.85
   1   4   1   52.87    1.82
  -1   4  -1   53.75    1.80
  -1   4  -1   54.31    1.89
  -1   5   1    0.62    0.16
   1   5  -1    0.56    0.18
   1   5  -1    0.53    0.15
  -1   5  -1    0.60    0.16
   1   5   1    0.45    0.16
  -1   5  -1    0.66    0.18
   1   6  -1   60.79    2.21
   1   6  -1   64.10    2.35
  -1   6   1   63.59    2.21
  -1   6  -1   65.34    2.21
   1   6   1   62.88    2.23
  -1   7   1    0.28    0.17
   1   7  -1    0.52    0.20
   1   7   1    0.06    0.16
  -1   7  -1    0.18    0.15
   1   8  -1   26.14    1.19
  -1   8   1   25.02    1.15
   1   8   1   25.31    1.18
  -1   8  -1   24.92    1.16
   1   0   2    0.14    0.05
   1   0   2    0.05    0.02
  -1   0   2    0.10    0.05
  -1   0   2    0.07    0.04
  -1   0  -2    0.09    0.05
   1   0  -2    0.03    0.04
  -1   1   2    9.63    0.41
   1  -1   2    9.74    0.38
  -1   1   2    9.36    0.37
   1   1  -2    8.95    0.38
   1  -1   2    9.69    0.42
   1   1   2    9.53    0.38
  -1   1  -2    9.19    0.41
  -1  -1   2    9.55    0.40
   1   1   2   10.03    0.41
  -1   1  -2    9.49    0.38
  -1  -1   2   10.26    0.40
   1   2  -2   12.12    0.48
  -1   2   2   12.54    0.53
  -1   2   2   12.34    0.50
   1   2  -2   12.03    0.51
  -1   2  -2   12.05    0.50
   1   2   2   12.38    0.52
  -1   2  -2   12.88    0.46
   1   2   2   13.08    0.51
   1   3  -2   92.43    2.91
   1   3  -2   87.64    2.95
  -1   3   2   91.38    2.86
   1   3  -2   91.13    2.87
  -1   3  -2   90.31    2.94
   1   3   2   88.88    2.87
  -1   3  -2   91.81    2.89
  -1   3  -2   89.12    2.85
  -1   4   2    3.77    0.29
   1   4  -2    4.21    0.29
   1   4  -2    4.11    0.29
   1   4  -2    4.18    0.31
  -1   4  -2    4.03    0.28
   1   4   2    3.62    0.29
  -1   4  -2    4.48    0.29
  -1   4  -2    4.34    0.32
  -1   5   2   41.17    1.49
   1   5  -2   39.85    1.48
   1   5  -2   42.24    1.58
   1   5  -2   41.26    1.50
  -1   5  -2   39.79    1.55
  -1   5  -2   41.27    1.48
   1   5   2   39.50    1.49
   1   6  -2   11.25    0.69
   1   6  -2   11.85    0.64
  -1   6   2   12.44    0.65
  -1   6  -2   13.30    0.72
   1   6   2   12.47    0.66
  -1   6  -2   12.03    0.63
   1   7  -2   20.82    1.10
  -1   7   2   21.97    1.01
   1   7  -2   22.27    1.02
  -1   7  -2   21.41    0.99
   1   7   2   23.08    1.05
  -1   8   2    1.94    0.32
   1   8  -2    1.20    0.29
  -1   8  -2    1.39    0.30
   1   8   2    1.81    0.33
   1   0  -3    0.05    0.04
  -1   0   3   -0.04    0.04
   1   0   3    0.06    0.05
   1   0   3    0.00    0.04
  -1   0  -3    0.03    0.05
  -1   1   3   10.91    0.48
  -1   1   3   10.38    0.44
   1   1  -3   10.63    0.46
  -1  -1  -3    9.31    0.49
   1   1  -3    9.96    0.45
   1  -1   3   10.91    0.49
  -1   1  -3   10.31    0.36
  -1  -1   3   10.60    0.46
   1   1   3   10.32    0.44
   1   1   3   11.46    0.48
  -1   1  -3   10.26    0.44
  -1   1  -3   10.49    0.48
  -1   2   3   76.01    2.51
   1   2  -3   76.01    2.44
   1  -2   3   72.78    2.68
  -1   2   3   68.62    2.35
  -1   2  -3   77.34    2.37
   1   2   3   73.59    2.38
   1   2   3   75.64    2.50
  -1  -2   3   72.44    2.66
  -1   2  -3   75.10    2.42
  -1   3   3    8.03    0.44
  -1   3   3    7.51    0.40
   1  -3   3    7.74    0.44
   1   3  -3    7.87    0.38
   1   3  -3    7.68    0.42
  -1   3  -3    7.67    0.41
  -1   3  -3    7.67    0.36
   1   3   3    7.19    0.41
   1   3   3    7.93    0.43
   1   4  -3   44.51    1.62
   1   4  -3   46.05    1.61
  -1   4   3   48.78    1.64
   1   4  -3   45.47    1.68
  -1   4  -3   45.17    1.60
   1   4   3   47.49    1.64
  -1   4  -3   45.72    1.67
  -1   4  -3   47.41    1.59
   1   5  -3    2.36    0.25
   1   5  -3    1.82    0.26
   1   5  -3    2.54    0.27
  -1   5   3    2.32    0.26
   1   5   3    1.96    0.26
  -1   5  -3    2.22    0.28
  -1   5  -3    2.39    0.24
  -1   5  -3    2.11    0.24
   1   6  -3   31.20    1.37
  -1   6   3   33.45    1.31
   1   6  -3   31.09    1.28
   1   6  -3   34.09    1.31
   1   6   3   30.68    1.30
  -1   6  -3   31.56    1.36
  -1   6  -3   32.45    1.28
   1   7  -3    0.99    0.25
   1   7  -3    1.62    0.32
  -1   7   3    1.48    0.27
   1   7   3    1.45    0.29
  -1   7  -3    1.54    0.27
  -1   7  -3    1.32    0.31
   1   8  -3   16.16    0.89
  -1   8   3   18.04    0.93
  -1   8  -3   16.27    0.88
   1   8   3   17.41    0.95
  -1   0   4    0.10    0.08
   1   0  -4    0.15    0.07
  -1   0  -4    0.08    0.07
   1   0   4    0.20    0.09
   1   0   4    0.18    0.08
   1   1  -4   40.03    1.51
   1   1  -4   39.65    1.40
   1  -1   4   41.44    1.54
  -1  -1  -4   38.70    1.56
  -1   1   4   41.40    1.46
  -1   1  -4   40.02    1.39
   1   1   4   42.18    1.46
   1  -1  -4   38.34    1.54
  -1  -1   4   41.19    1.51
   1   1   4   39.06    1.37
  -1   1  -4   38.35    1.52
   1  -2   4    3.02    0.25
  -1   2   4    3.23    0.26
  -1   2   4    3.27    0.24
   1   2  -4    3.01    0.24
   1   2   4    2.64    0.24
  -1   2  -4    3.42    0.24
  -1  -2   4    3.12    0.24
   1   2   4    2.89    0.24
   1   3  -4   13.22    0.62
  -1   3   4   13.24    0.66
   1   3  -4   13.92    0.57
   1  -3   4   13.35    0.66
  -1   3   4   12.82    0.60
   1   3   4   12.74    0.61
  -1  -3   4   13.55    0.65
  -1   3  -4   13.63    0.54
  -1   3  -4   13.26    0.61
   1   3   4   13.99    0.66
   1   4  -4    4.58    0.35
   1  -4   4    4.89    0.39
  -1   4   4    4.09    0.33
   1   4  -4    4.63    0.31
  -1   4  -4    5.01    0.37
  -1   4  -4    4.15    0.32
   1   4   4    4.62    0.38
   1   4   4    4.02    0.34
  -1   4  -4    4.06    0.28
  -1  -4   4    4.59    0.36
   1   5  -4   36.36    1.40
   1   5  -4   38.15    1.38
   1   5  -4   36.89    1.48
  -1   5   4   35.57    1.41
   1   5   4   36.53    1.43
  -1   5  -4   36.33    1.39
  -1   5  -4   38.50    1.48
  -1   5  -4   37.62    1.35
   1   6  -4    3.65    0.34
   1   6  -4    3.01    0.37
  -1   6   4    3.12    0.35
   1   6  -4    3.36    0.35
  -1   6  -4    2.57    0.31
   1   6   4    3.34    0.37
  -1   6  -4    3.91    0.40
   1   7  -4   33.95    1.55
   1   7  -4   34.55    1.44
  -1   7   4   34.84    1.45
  -1   7  -4   36.05    1.56
  -1   7  -4   33.89    1.41
   1   7   4   36.67    1.50
   1   8  -4    1.78    0.40
  -1   8   4    2.07    0.34
   1   8  -4    2.13    0.35
  -1   8  -4    1.67    0.32
   1   8   4    2.04    0.36
  -1   8  -4    1.83    0.39
  -1   0  -5   -0.02    0.06
  -1   0   5    0.05    0.07
   1   0   5    0.00    0.07
   1   0  -5    0.05    0.07
   1   1  -5    2.22    0.22
  -1   1   5    1.39    0.12
  -1   1   5    1.75    0.21
   1  -1   5    1.87    0.21
   1  -1   5    1.77    0.21
  -1  -1  -5    1.45    0.20
   1   1  -5    1.60    0.18
   1  -1  -5    1.45    0.19
  -1   1  -5    2.11    0.21
  -1  -1   5    1.66    0.20
  -1  -1   5    1.68    0.19
  -1   1  -5    2.16    0.22
   1   1   5    1.70    0.21
   1  -2   5   31.82    1.23
   1   2  -5   27.48    1.12
  -1   2   5   28.75    1.18
  -1  -2  -5   29.76    1.28
  -1   2   5   28.09    1.09
   1   2  -5   30.45    0.97
   1  -2  -5   28.95    1.26
   1   2   5   27.83    1.11
  -1   2  -5   28.37    1.11
   1   2   5   28.87    1.18
  -1  -2   5   30.36    1.20
  -1   2  -5   29.84    0.97
  -1   3   5    1.99    0.26
   1  -3   5    2.29    0.26
   1   3  -5    2.07    0.25
   1   3  -5    2.34    0.22
  -1   3   5    2.00    0.24
  -1   3  -5    2.21    0.20
   1   3   5    1.74    0.24
  -1  -3   5    2.14    0.25
  -1   3  -5    2.00    0.23
   1   3   5    1.75    0.25
   1   4  -5   24.59    0.92
  -1   4   5   21.39    1.03
   1   4  -5   23.40    1.01
  -1   4   5   20.86    0.95
  -1   4  -5   22.29    0.98
  -1   4  -5   23.90    0.89
   1   4   5   23.01    0.99
  -1  -4   5   22.84    1.04
   1   4   5   23.41    1.05
   1   5  -5    2.09    0.31
   1   5  -5    2.31    0.28
  -1   5   5    2.25    0.29
   1   5  -5    2.42    0.26
  -1   5  -5    1.67    0.25
  -1   5  -5    2.18    0.30
  -1   5  -5    2.42    0.25
   1   5   5    2.06    0.29
   1   6  -5   24.66    1.19
   1   6  -5   24.57    1.11
  -1   6   5   26.51    1.14
  -1   6  -5   25.45    1.18
   1   6   5   26.24    1.16
  -1   6  -5   24.62    1.09
   1   7  -5    1.40    0.34
   1   7  -5    1.73    0.30
  -1   7   5    1.34    0.29
  -1   7  -5    1.25    0.27
   1   7   5    1.76    0.32
  -1   7  -5    0.95    0.28
   1   0   6    0.02    0.10
   1   0  -6    0.02    0.09
  -1   0   6   -0.03    0.09
  -1   0  -6    0.05    0.09
  -1  -1  -6    1.26    0.21
   1   1  -6    1.75    0.20
   1   1  -6    1.48    0.21
   1  -1   6    1.68    0.23
  -1   1   6    1.48    0.23
   1  -1   6    2.08    0.23
  -1  -1   6    1.72    0.22
  -1   1  -6    1.40    0.20
  -1   1  -6    2.27    0.24
   1  -1  -6    1.49    0.22
  -1  -1   6    2.21    0.22
   1   1   6    1.35    0.22
   1   1   6    1.67    0.10
  -1  -2  -6    3.64    0.36
   1   2  -6    4.31    0.35
  -1   2   6    3.76    0.35
   1  -2   6    4.48    0.37
   1   2   6    3.95    0.33
  -1  -2   6    3.86    0.33
  -1  -2   6    4.23    0.34
   1   2   6    4.06    0.37
  -1   2  -6    4.29    0.33
   1  -2  -6    4.26    0.37
   1  -3   6   28.39    1.19
   1   3  -6   28.36    1.03
  -1  -3  -6   25.95    1.24
  -1   3   6   23.45    1.04
  -1   3   6   25.29    1.16
   1   3  -6   25.85    0.91
   1   3  -6   26.40    1.10
   1   3   6   23.77    1.13
  -1   3  -6   25.47    0.91
  -1  -3   6   27.60    1.15
   1   3   6   24.21    1.07
  -1   3  -6   25.19    1.07
  -1   3  -6   28.03    0.99
   1  -3  -6   25.33    1.22
   1   4  -6    1.78    0.22
  -1   4   6    1.68    0.29
   1   4  -6    1.63    0.26
  -1   4   6    1.80    0.27
  -1  -4  -6    1.62    0.29
  -1   4  -6    1.13    0.18
   1   4   6    1.19    0.26
   1   4   6    1.50    0.25
  -1   4  -6    1.59    0.20
  -1   4  -6    2.15    0.28
   1   5  -6   18.49    0.95
   1   5  -6   17.61    0.88
  -1   5   6   18.01    0.89
  -1   5  -6   19.41    0.83
  -1   5  -6   20.55    0.96
  -1   5  -6   18.45    0.88
   1   5   6   18.80    0.92
   1   6  -6    0.95    0.25
  -1   6   6    1.16    0.27
   1   6  -6    1.20    0.30
  -1   6  -6    1.00    0.24
   1   6   6    1.34    0.29
  -1   6  -6    0.82    0.26
   1   7  -6    9.31    0.65
   1   7  -6    8.69    0.69
  -1   7   6    9.59    0.66
  -1   7  -6    8.54    0.61
   1   7   6    9.74    0.69
  -1   7  -6    9.48    0.72
   1   0  -7   -0.01    0.10
   1   0   7    0.10    0.12
  -1   0  -7    0.06    0.11
  -1   0   7    0.13    0.12
   1   1  -7    1.45    0.23
   1   1  -7    1.68    0.22
  -1   1   7    1.44    0.25
  -1  -1  -7    1.84    0.26
   1  -1   7    1.86    0.25
   1  -1   7    1.38    0.24
   1  -1  -7    1.86    0.25
   1   1   7    1.42    0.25
  -1   1  -7    1.64    0.23
  -1  -1   7    1.56    0.24
  -1   1  -7    1.43    0.22
  -1   2   7    2.78    0.33
   1   2  -7    3.57    0.34
   1  -2   7    2.84    0.32
  -1  -2  -7    3.45    0.37
   1  -2   7    2.65    0.31
  -1  -2   7    2.38    0.29
   1  -2  -7    2.98    0.34
   1   2   7    2.21    0.31
  -1   2  -7    3.07    0.31
   1   3  -7    0.16    0.15
  -1   3   7    0.52    0.22
  -1  -3  -7    0.37    0.21
   1  -3  -7    0.37    0.18
  -1   3  -7    0.31    0.15
  -1  -3   7    0.50    0.18
  -1   3  -7    0.46    0.14
   1   3   7    0.48    0.19
  -1  -4  -7   26.46    1.36
   1   4  -7   27.11    1.20
  -1   4   7   26.27    1.27
   1  -4  -7   25.75    1.34
   1   4   7   26.30    1.26
   1   4   7   26.04    1.17
  -1   4  -7   28.61    1.20
   1   5  -7    0.95    0.23
  -1   5   7    0.75    0.24
   1   5  -7    0.40    0.22
  -1   5  -7    0.98    0.24
   1   5   7    0.51    0.23
  -1   5  -7    0.36    0.20
   1   6  -7   14.15    0.85
   1   6  -7   12.92    0.76
  -1   6   7   12.22    0.76
   1   6   7   12.51    0.79
  -1   6  -7   12.13    0.73
  -1   6  -7   13.90    0.85
  -1   0  -8    0.46    0.16
  -1   0   8    0.18    0.16
  -1   0  -8    0.32    0.16
   1   0  -8    0.07    0.13
   1   0   8    0.23    0.16
   1   0  -8    0.09    0.14
  -1  -1  -8    8.57    0.59
  -1   1   8    7.17    0.55
   1   1  -8    8.95    0.54
   1  -1   8    8.33    0.57
   1   1  -8    9.44    0.57
  -1   1  -8    8.98    0.55
   1  -1  -8    8.52    0.57
  -1   1  -8    9.34    0.57
  -1  -1   8    8.23    0.56
   1   1   8    7.55    0.56
   1  -2   8    1.90    0.30
  -1  -2  -8    2.05    0.32
   1   2  -8    2.64    0.32
  -1   2   8    1.42    0.29
   1   2   8    1.71    0.31
   1  -2  -8    1.74    0.30
  -1   2  -8    1.81    0.27
  -1  -2   8    1.49    0.28
   1   3  -8    2.43    0.33
   1  -3   8    3.32    0.38
  -1  -3  -8    1.85    0.34
  -1   3   8    2.05    0.35
  -1   3  -8    2.34    0.32
   1  -3  -8    2.23    0.36
   1   3   8    2.36    0.36
  -1  -3   8    2.55    0.33
   1   4  -8    1.89    0.31
  -1   4   8    2.24    0.37
   1  -4   8    1.58    0.31
   1  -4  -8    1.48    0.35
  -1  -4   8    1.74    0.31
   1   4   8    1.60    0.33
  -1   4  -8    1.90    0.32
   1   5  -8   11.22    0.74
  -1   5  -8    9.27    0.67
  -1   5  -8    9.43    0.64
  -1  -5   8    9.55    0.66
   1   5   8   10.80    0.78
  -1   0  -9   -0.11    0.14
   1   0   9    0.03    0.15
  -1   0   9   -0.16    0.15
   1   0  -9   -0.04    0.16
  -1   1   9    0.11    0.18
   1   1  -9    0.28    0.18
   1  -1   9    0.22    0.19
  -1  -1  -9    0.07    0.17
  -1   1  -9    0.09    0.14
   1   1   9    0.04    0.17
  -1  -1   9    0.13    0.17
   1  -2   9    1.95    0.34
  -1   2   9    1.60    0.32
  -1  -2  -9    2.20    0.37
   1   2  -9    2.08    0.33
   1   2   9    1.38    0.31
  -1   2  -9    2.17    0.32
  -1  -2   9    1.67    0.31
   1  -2  -9    1.86    0.34
  -1   3   9    0.43    0.24
   1  -3   9   -0.06    0.18
   1   3  -9    0.06    0.18
  -1  -3   9    0.07    0.20
   1   3   9    0.28    0.21
   1  -3  -9    0.12    0.23
  -1   3  -9    0.22    0.21
   1  -4   9    6.49    0.57
  -1   4   9    6.48    0.61
   1   4  -9    7.38    0.60
   1   4   9    7.10    0.64
  -1   4  -9    8.23    0.62
  -1  -4   9    6.29    0.56
   1   0 -10    0.01    0.18
  -1   0  10    0.16    0.22
   1   0  10   -0.03    0.21
  -1   0 -10    0.15    0.19
  -1   1  10    0.15    0.22
   1   1 -10    0.26    0.20
   1  -1  10    0.22    0.22
  -1  -1  10    0.42    0.24
   1   1  10    0.28    0.22
  -1   1 -10    0.31    0.21
   1  -2  10    0.70    0.28
  -1   2  10    0.97    0.30
   1   2 -10    1.28    0.31
   1   2  10    1.13    0.34
  -1  -2  10    0.80    0.29
  -1   2 -10    0.88    0.28
   1   3 -10    5.32    0.56
   1  -3  10    6.13    0.59
  -1   3  10    4.82    0.57
  -1  -3  10    5.55    0.55
  -1   3 -10    5.28    0.53
   1   3  10    4.15    0.55
  -2   0   0    0.01    0.01
   2   1   0   73.16    2.33
   2   1   0   73.58    2.39
  -2   1   0   75.10    2.33
   2  -1   0   78.45    2.39
   2   1   0   76.38    2.41
  -2  -1   0   77.31    2.39
  -2  -1   0   78.71    2.33
   2  -1   0   78.54    2.32
   2   2   0   92.15    3.00
   2  -2   0   98.93    3.00
  -2   2   0   94.15    2.90
  -2   2   0   96.21    3.00
   2   2   0   91.81    3.01
   2   3   0   49.39    1.67
   2   3   0   48.68    1.60
  -2   3   0   48.55    1.58
   2   3   0   47.39    1.65
   2   4   0   55.82    1.95
  -2   4   0   58.32    1.87
   2   4   0   54.30    1.96
   2   4   0   56.10    1.89
  -2   5   0    4.36    0.32
   2   5   0    4.43    0.34
  -2   6   0   23.69    0.98
   2   6   0   22.08    0.99
   2   7   0    0.29    0.19
  -2   7   0    0.13    0.15
   2   8   0    1.63    0.32
  -2   8   0    2.08    0.32
  -2   0   1   81.28    2.55
  -2   0  -1   70.96    2.42
   2   0   1   77.41    2.81
  -2   0  -1   78.25    2.81
   2   0   1   84.45    2.44
   2   0   1   82.65    2.53
   2   0  -1   90.95    2.56
  -2   0   1   68.22    2.55
   2   0  -1   87.54    2.54
  -2  -1  -1  362.46   10.66
   2   1  -1  336.46   10.99
  -2   1   1  353.20   11.21
  -2   1   1  345.29   10.67
   2   1  -1  342.02   10.93
   2  -1   1  368.32   11.11
   2  -1   1  369.94   10.93
  -2  -1   1  361.56   10.92
   2   1   1  363.46   11.21
  -2   1  -1  358.98   10.94
   2   1   1  359.77   10.68
  -2   1  -1  359.11   11.15
   2   2  -1   40.78    1.36
  -2   2   1   41.24    1.32
   2   2  -1   38.52    1.37
   2   2  -1   40.41    1.33
   2  -2   1   43.78    1.37
  -2   2  -1   40.44    1.31
   2   2   1   43.38    1.34
  -2   2  -1   39.64    1.33
  -2   2  -1   40.09    1.36
  -2   3   1  154.52    4.81
   2   3  -1  157.04    4.96
   2   3  -1  157.93    4.96
  -2   3  -1  155.52    4.92
   2   3   1  156.89    4.83
  -2   3  -1  156.48    4.95
  -2   3  -1  159.58    4.80
   2   4  -1    5.00    0.32
   2   4  -1    4.27    0.30
   2   4  -1    4.71    0.34
  -2   4   1    4.50    0.29
  -2   4  -1    4.83    0.33
   2   4   1    4.59    0.31
  -2   4  -1    5.10    0.30
   2   5  -1   25.08    1.03
   2   5  -1   24.21    1.05
   2   5  -1   25.86    1.11
  -2   5   1   28.25    1.04
  -2   5  -1   27.03    1.11
   2   5   1   25.97    1.05
  -2   5  -1   25.52    1.01
   2   6  -1    5.73    0.47
  -2   6   1    6.02    0.42
   2   6  -1    6.06    0.44
   2   6   1    6.12    0.44
  -2   6  -1    5.89    0.41
  -2   7   1    3.28    0.34
   2   7  -1    3.01    0.36
  -2   7  -1    3.03    0.33
   2   7   1    2.72    0.34
  -2   8   1    0.32    0.22
   2   8  -1    0.39    0.22
   2   8   1    0.45    0.23
  -2   8  -1    0.60    0.23
  -2   0  -2   95.62    2.66
   2   0   2   79.54    2.65
   2   0   2   81.76    2.71
   2   0  -2   90.27    3.04
  -2   0   2   84.58    2.78
   2   0   2   80.80    3.04
  -2   0  -2   87.90    3.05
  -2   0   2   78.95    2.73
   2   0  -2   98.26    2.76
  -2   1   2  226.42    7.13
   2  -1   2  230.27    8.19
   2   1  -2  237.33    7.32
  -2   1   2  238.07    7.51
   2  -1   2  245.58    7.29
  -2   1  -2  233.14    8.19
   2   1   2  234.75    7.15
  -2  -1   2  227.75    8.18
  -2   1  -2  235.39    7.30
   2   1   2  244.27    7.51
  -2   1  -2  250.26    7.35
  -2  -1   2  241.88    7.32
  -2   2   2  206.85    6.46
  -2   2   2  216.56    6.81
   2   2  -2  210.16    6.63
   2   2  -2  214.13    6.64
  -2   2  -2  219.05    6.61
   2   2   2  212.66    6.48
   2   2   2  214.41    6.79
  -2   2  -2  212.68    6.61
   2   3  -2   20.64    0.80
  -2   3   2   21.54    0.80
   2   3  -2   20.98    0.81
  -2   3  -2   21.15    0.82
   2   3   2   22.39    0.83
  -2   3  -2   21.13    0.79
  -2   3  -2   21.79    0.77
   2   4  -2   24.94    0.96
   2   4  -2   25.30    0.96
  -2   4   2   23.61    0.94
   2   4  -2   24.92    1.01
  -2   4  -2   24.91    0.99
  -2   4  -2   25.42    0.94
  -2   4  -2   25.06    0.93
   2   4   2   24.60    0.97
  -2   5   2    9.81    0.52
   2   5  -2   10.33    0.54
   2   5  -2    9.63    0.57
   2   5  -2    9.52    0.53
   2   5   2    9.81    0.54
  -2   5  -2    9.73    0.56
  -2   5  -2    9.32    0.50
  -2   6   2    9.62    0.55
   2   6  -2    9.81    0.63
   2   6  -2    9.41    0.56
   2   6   2    9.44    0.57
  -2   6  -2    8.94    0.53
  -2   6  -2    9.45    0.60
  -2   7   2    0.36    0.19
   2   7  -2   -0.03    0.17
   2   7  -2    0.32    0.18
  -2   7  -2   -0.06    0.14
   2   7   2    0.17    0.18
   2   8  -2    1.18    0.29
  -2   8   2    1.08    0.28
  -2   8  -2    1.12    0.28
   2   8   2    1.74    0.33
   2   0   3   35.28    1.07
   2   0   3   33.10    1.27
   2   0   3   33.18    1.18
  -2   0   3   33.11    1.17
   2   0  -3   32.47    1.23
  -2   0  -3   32.42    1.27
   2  -1   3  235.23    7.94
  -2  -1  -3  219.48    7.95
  -2   1   3  236.00    7.29
   2   1  -3  224.36    7.90
   2   1  -3  222.30    7.10
  -2   1   3  225.66    6.92
   2   1   3  227.97    6.93
  -2   1  -3  226.16    7.07
  -2  -1   3  231.78    7.90
  -2   1  -3  235.05    7.09
  -2   1  -3  224.43    7.94
   2   1   3  236.14    7.29
  -2   2   3    5.48    0.29
   2   2  -3    4.60    0.29
  -2   2   3    6.05    0.34
   2  -2   3    5.70    0.33
   2   2   3    5.66    0.32
  -2   2  -3    4.58    0.28
   2   2   3    5.53    0.31
  -2  -2   3    5.87    0.30
  -2   2  -3    5.14    0.24
   2   3  -3  103.73    3.48
  -2   3   3  106.12    3.58
   2   3  -3  107.80    3.44
  -2   3   3  106.07    3.38
   2  -3   3  110.92    3.87
   2   3   3  106.79    3.57
   2   3   3  110.90    3.42
  -2   3  -3  105.45    3.46
  -2   3  -3  107.28    3.40
  -2   4   3    2.67    0.25
   2   4  -3    2.67    0.28
   2   4  -3    3.00    0.25
   2   4  -3    2.64    0.25
  -2   4  -3    2.90    0.22
   2   4   3    3.23    0.28
  -2   4  -3    2.78    0.24
  -2   4  -3    3.12    0.27
   2   5  -3   17.30    0.76
   2   5  -3   16.68    0.77
  -2   5   3   16.85    0.76
   2   5  -3   16.58    0.82
  -2   5  -3   17.18    0.75
  -2   5  -3   16.31    0.79
  -2   5  -3   17.00    0.72
   2   5   3   16.07    0.78
   2   6  -3    2.22    0.29
   2   6  -3    2.78    0.35
  -2   6   3    3.42    0.33
   2   6  -3    2.71    0.31
   2   6   3    2.78    0.32
  -2   6  -3    2.48    0.29
  -2   6  -3    3.11    0.35
   2   7  -3    2.04    0.31
  -2   7   3    2.65    0.33
   2   7  -3    1.68    0.33
   2   7   3    2.40    0.35
  -2   7  -3    1.87    0.28
  -2   7  -3    1.95    0.34
  -2   8   3    0.57    0.23
   2   8  -3    0.14    0.21
   2   8  -3    0.52    0.30
  -2   8  -3    0.73    0.25
   2   8   3    0.38    0.25
   2   0  -4  176.97    6.31
  -2   0   4  181.60    5.83
   2   0   4  178.52    5.83
   2   0   4  188.95    6.36
  -2   0  -4  180.20    6.36
  -2   1   4  116.91    3.84
   2   1  -4  117.61    4.10
  -2   1   4  120.66    3.65
  -2  -1  -4  116.88    4.18
   2   1  -4  112.83    3.73
   2  -1   4  121.20    4.16
   2  -1  -4  111.94    4.14
   2   1   4  116.78    3.83
   2   1   4  111.73    3.64
  -2  -1   4  114.81    3.80
  -2   1  -4  116.91    3.65
  -2   1  -4  115.95    4.15
  -2   1  -4  116.98    3.71
  -2  -1   4  118.65    4.10
  -2   2   4   32.89    1.26
   2   2  -4   32.40    1.21
  -2  -2  -4   30.88    1.35
   2  -2   4   33.73    1.32
  -2   2   4   32.06    1.16
  -2  -2   4   33.99    1.27
   2   2   4   33.23    1.25
  -2   2  -4   34.40    1.10
  -2   2  -4   30.88    1.17
   2   2   4   33.01    1.19
  -2   3   4   16.14    0.73
   2   3  -4   18.03    0.78
   2   3  -4   18.66    0.73
  -2   3   4   16.16    0.79
   2  -3   4   18.96    0.84
  -2  -3   4   17.54    0.79
  -2   3  -4   18.89    0.68
  -2   3  -4   18.43    0.76
   2   3   4   17.73    0.80
   2   3   4   17.53    0.76
   2   4  -4   34.71    1.38
   2   4  -4   35.14    1.30
  -2   4   4   35.24    1.32
  -2  -4   4   38.29    1.47
  -2   4  -4   36.48    1.26
   2   4   4   35.07    1.41
   2   4   4   37.00    1.36
  -2   4  -4   34.14    1.35
  -2   4  -4   35.03    1.30
  -2   5   4    3.33    0.32
   2   5  -4    3.11    0.34
   2   5  -4    3.21    0.29
   2   5  -4    2.56    0.29
  -2   5  -4    3.18    0.28
  -2   5  -4    3.30    0.31
   2   5   4    3.38    0.34
  -2   5  -4    3.28    0.33
   2   6  -4    7.79    0.58
  -2   6   4    8.88    0.55
   2   6  -4    8.01    0.52
   2   6  -4    7.89    0.52
   2   6   4    8.51    0.56
  -2   6  -4    8.63    0.52
  -2   6  -4    8.57    0.58
   2   7  -4    0.75    0.27
   2   7  -4    1.18    0.28
  -2   7   4    1.22    0.26
   2   7   4    1.33    0.29
  -2   7  -4    1.03    0.24
  -2   7  -4    1.07    0.29
   2   8  -4    1.06    0.28
   2   8  -4    0.67    0.31
  -2   8   4    0.64    0.26
  -2   8  -4    0.87    0.27
   2   8   4    1.08    0.31
  -2   0  -5   19.17    0.86
   2   0  -5   18.09    0.81
   2   0   5   18.30    0.81
  -2   0   5   18.57    0.80
   2   0   5   21.39    0.88
  -2   1   5   92.89    3.10
   2   1  -5   91.55    3.27
   2   1  -5   86.83    3.01
   2  -1   5   98.13    3.35
  -2  -1  -5   86.95    3.35
  -2   1   5   94.27    2.86
  -2   1  -5   93.79    2.99
  -2  -1   5   93.56    3.27
   2   1   5   91.40    2.95
  -2   1  -5   88.13    3.32
   2  -1  -5   87.57    3.32
  -2  -1   5   88.81    3.06
   2   1   5   90.65    3.10
   2  -2   5    7.83    0.45
  -2   2   5    6.61    0.44
   2   2  -5    7.09    0.42
  -2  -2  -5    6.20    0.44
  -2   2  -5    6.42    0.38
   2  -2  -5    6.87    0.45
   2   2   5    6.71    0.41
   2   2   5    7.26    0.44
  -2   2  -5    6.81    0.29
  -2  -2   5    7.50    0.40
  -2   3   5   48.11    1.89
   2   3  -5   53.22    1.76
   2   3  -5   52.27    1.84
   2  -3   5   50.42    1.99
  -2   3   5   45.77    1.74
  -2  -3  -5   49.02    2.05
  -2   3  -5   54.10    1.70
  -2  -3   5   51.57    1.94
   2   3   5   47.02    1.87
   2   3   5   48.04    1.78
  -2   3  -5   52.69    1.69
  -2   3  -5   52.51    1.80
  -2   4   5    2.66    0.32
   2   4  -5    2.93    0.31
  -2   4   5    2.81    0.29
   2   4  -5    3.66    0.29
   2   4   5    3.12    0.34
  -2   4  -5    3.69    0.25
  -2   4  -5    3.40    0.30
  -2  -4   5    3.32    0.33
   2   4   5    3.09    0.31
  -2   5   5   20.98    0.91
   2   5  -5   20.03    0.86
   2   5  -5   18.21    0.94
   2   5  -5   18.99    0.90
  -2   5  -5   19.48    0.93
  -2   5  -5   20.16    0.88
   2   5   5   19.64    0.93
   2   6  -5    0.82    0.26
  -2   6   5    1.03    0.24
   2   6  -5    0.79    0.22
   2   6  -5    0.95    0.23
  -2   6  -5    0.84    0.21
   2   6   5    1.28    0.27
  -2   6  -5    0.52    0.22
   2   7  -5    6.37    0.52
   2   7  -5    6.09    0.56
  -2   7   5    5.95    0.50
  -2   7  -5    6.97    0.58
  -2   7  -5    6.21    0.48
   2   7   5    5.81    0.52
   2   0   6   25.14    1.06
   2   0  -6   24.53    1.06
  -2   0   6   25.28    1.05
  -2   0  -6   25.21    1.11
   2  -1   6   22.32    0.95
   2   1  -6   19.49    0.87
   2   1  -6   20.34    0.87
  -2   1   6   18.99    0.89
   2  -1   6   19.85    0.89
  -2  -1  -6   20.03    0.95
  -2   1  -6   20.65    0.85
  -2  -1   6   19.01    0.86
   2  -1  -6   18.77    0.91
   2   1   6   19.65    0.90
  -2   1  -6   20.18    0.92
   2  -2   6   89.85    3.16
   2   2  -6   82.39    2.86
  -2  -2  -6   84.60    3.21
  -2   2   6   82.56    2.95
  -2   2   6   86.73    2.70
  -2  -2   6   76.99    2.87
   2   2   6   79.76    2.94
   2   2   6   80.26    2.79
   2  -2  -6   81.93    3.16
  -2  -2   6   91.37    3.09
  -2   2  -6   84.45    2.82
  -2  -3  -6    7.72    0.55
   2   3  -6    6.95    0.41
  -2   3   6    5.53    0.46
   2   3  -6    6.52    0.46
  -2   3  -6    6.56    0.32
  -2   3  -6    7.31    0.37
   2   3   6    5.74    0.43
  -2   3  -6    7.13    0.45
  -2  -3   6    7.11    0.45
   2   3   6    5.90    0.47
   2  -3  -6    6.46    0.49
  -2   4   6   11.82    0.64
  -2  -4  -6   11.01    0.75
   2   4  -6   11.99    0.59
   2   4  -6   11.80    0.68
  -2   4  -6   12.41    0.55
   2   4   6   12.53    0.68
   2   4   6   13.47    0.75
  -2   4  -6   12.77    0.67
   2   5  -6    2.63    0.35
   2   5  -6    2.79    0.32
  -2   5   6    2.72    0.32
   2   5  -6    2.37    0.29
  -2   5  -6    3.02    0.35
  -2   5  -6    2.86    0.29
   2   5   6    2.46    0.34
  -2   5  -6    2.58    0.30
  -2   6   6    2.34    0.33
   2   6  -6    1.54    0.29
   2   6  -6    2.38    0.37
  -2   6  -6    1.86    0.34
   2   6   6    2.51    0.35
  -2   6  -6    1.77    0.29
   2   7  -6    0.57    0.29
  -2   7   6    0.50    0.24
   2   7  -6    0.56    0.25
   2   7   6    0.69    0.26
  -2   7  -6    0.66    0.29
  -2   7  -6    0.16    0.21
   2   0  -7   12.31    0.64
  -2   0  -7   11.58    0.66
  -2   0   7   12.51    0.66
   2   0   7   11.00    0.65
  -2   1   7   19.38    0.93
   2   1  -7   19.48    0.88
   2   1  -7   18.10    0.87
  -2  -1  -7   21.65    0.99
   2  -1   7   18.76    0.91
  -2  -1   7   18.52    0.89
   2  -1  -7   17.97    0.91
   2   1   7   18.62    0.92
  -2   1  -7   20.05    0.94
  -2   1  -7   19.51    0.86
  -2   2   7    8.24    0.57
   2  -2   7    8.73    0.56
   2   2  -7    8.88    0.55
  -2  -2  -7    9.88    0.64
   2  -2  -7    9.96    0.61
  -2  -2   7    9.52    0.56
  -2   2  -7    9.56    0.54
   2   2   7    8.78    0.59
  -2   3   7   22.06    1.10
  -2  -3  -7   24.88    1.22
   2   3  -7   23.70    1.07
   2   3   7   21.86    1.10
  -2   3  -7   24.00    1.04
   2  -3  -7   24.00    1.18
  -2  -3   7   22.16    1.03
   2   3   7   24.50    1.07
   2   4  -7    4.93    0.38
  -2  -4  -7    4.57    0.49
   2   4  -7    4.19    0.43
  -2   4   7    5.51    0.49
   2   4   7    5.52    0.50
   2  -4  -7    5.39    0.52
   2   4   7    4.70    0.44
  -2   4  -7    5.24    0.44
   2   5  -7    5.05    0.50
  -2   5   7    5.00    0.45
  -2   5  -7    5.24    0.47
  -2   5  -7    5.33    0.43
   2   5   7    5.04    0.48
   2   5   7    5.52    0.54
  -2   6   7    1.03    0.27
   2   6  -7    1.06    0.28
   2   6  -7    1.46    0.33
  -2   6  -7    0.98    0.30
  -2   6  -7    0.97    0.26
   2   6   7    1.04    0.28
  -2   0  -8   47.95    1.79
   2   0  -8   48.03    1.92
   2   0  -8   47.39    1.82
  -2   0  -8   50.02    1.99
  -2   0   8   45.49    1.86
   2   0   8   45.18    1.87
   2   1  -8    3.22    0.35
   2  -1   8    3.95    0.41
  -2   1   8    2.98    0.37
  -2  -1  -8    3.89    0.39
   2   1   8    3.70    0.41
   2  -1  -8    3.90    0.37
  -2   1  -8    3.88    0.37
  -2   1  -8    3.82    0.36
  -2  -1   8    3.31    0.37
  -2   2   8   17.37    0.91
   2  -2   8   14.48    0.85
  -2  -2  -8   18.04    0.96
   2   2  -8   17.19    0.87
  -2   2  -8   17.92    0.85
  -2  -2   8   15.85    0.84
   2   2   8   15.92    0.90
   2  -2  -8   16.75    0.91
   2   3  -8    7.22    0.53
  -2   3   8    6.04    0.53
  -2  -3  -8    7.18    0.61
   2  -3   8    6.82    0.54
  -2   3  -8    6.79    0.50
   2  -3  -8    7.57    0.60
   2   3   8    6.57    0.55
  -2  -3   8    6.46    0.50
  -2   4   8    9.31    0.70
   2   4  -8   10.63    0.69
   2  -4  -8   10.45    0.76
  -2  -4   8    9.27    0.63
  -2   4  -8   10.04    0.65
   2   4   8    9.10    0.69
   2   5  -8    0.40    0.24
  -2   5  -8    0.02    0.23
   2   5   8    0.56    0.26
  -2  -5   8    0.69    0.25
  -2   5  -8    0.62    0.23
   2   5   8    0.89    0.30
   2   0   9    1.89    0.33
   2   0  -9    1.60    0.29
  -2   0  -9    2.70    0.33
  -2   0   9    1.48    0.30
   2  -1   9   10.13    0.70
   2   1  -9   10.98    0.68
  -2   1   9   10.65    0.72
  -2  -1  -9   10.18    0.70
   2   1   9    9.95    0.70
  -2  -1   9   11.17    0.70
  -2   1  -9   10.97    0.66
  -2   2   9    6.57    0.56
  -2  -2  -9    5.71    0.55
   2   2  -9    5.57    0.49
   2  -2   9    5.94    0.52
  -2   2  -9    5.90    0.49
  -2  -2   9    5.67    0.50
   2   2   9    5.22    0.53
   2  -3   9    4.57    0.50
   2   3  -9    5.85    0.53
  -2   3   9    6.19    0.58
   2   3   9    5.55    0.56
  -2   3  -9    6.52    0.52
  -2  -3   9    5.60    0.50
  -2   4   9    1.94    0.39
   2   4  -9    2.57    0.40
   2  -4   9    2.77    0.40
  -2   4  -9    2.16    0.37
   2   4   9    2.04    0.41
  -2  -4   9    2.21    0.35
  -2   0  10    5.82    0.54
   2   0 -10    5.26    0.52
   2   0  10    5.56    0.56
  -2   0 -10    5.85    0.51
  -2   1  10    5.05    0.53
   2   1 -10    5.05    0.50
   2  -1  10    4.99    0.54
   2   1  10    4.80    0.53
  -2  -1  10    4.37    0.50
  -2   1 -10    5.80    0.50
   2  -2  10   17.34    1.00
   2   2 -10   18.02    0.97
  -2   2  10   15.26    0.97
  -2   2 -10   17.82    0.94
   2   2  10   14.85    0.98
  -2  -2  10   16.26    0.96
   2   3 -10    1.94    0.38
  -2   3  10    2.39    0.43
   2  -3  10    2.08    0.39
  -2  -3  10    2.25    0.39
   2   3  10    2.17    0.43
  -3   0   0    0.08    0.02
   3   0   0    0.02    0.01
   3   1   0   21.07    0.72
  -3  -1   0   21.85    0.70
   3  -1   0   21.81    0.68
  -3  -1   0   22.19    0.72
   3   1   0   20.79    0.72
  -3   1   0   20.46    0.67
   3   2   0   14.61    0.55
  -3   2   0   14.94    0.52
   3   2   0   14.48    0.57
   3   2   0   15.09    0.58
   3  -2   0   15.05    0.57
   3   3   0    3.58    0.24
  -3   3   0    4.13    0.23
   3   3   0    4.38    0.28
   3   4   0   31.44    1.14
   3   4   0   30.36    1.19
  -3   4   0   31.76    1.11
   3   4   0   30.22    1.18
   3   5   0   35.64    1.33
   3   5   0   34.34    1.39
  -3   5   0   35.05    1.28
  -3   6   0    8.67    0.50
   3   6   0    8.33    0.53
  -3   7   0   17.69    0.84
   3   7   0   18.11    0.91
   3   8   0   11.21    0.74
  -3   8   0   11.59    0.68
  -3   0   1    0.00    0.02
  -3   0  -1    0.02    0.02
   3   0  -1    0.10    0.03
   3   0   1    0.14    0.03
  -3   0  -1    0.13    0.03
  -3   0   1    0.01    0.02
  -3   0  -1    0.02    0.02
   3   0   1    0.03    0.03
   3   0  -1    0.09    0.02
   3   0   1    0.06    0.02
   3  -1   1   48.75    1.49
   3   1  -1   42.95    1.50
  -3  -1  -1   45.40    1.45
  -3   1   1   46.23    1.44
   3  -1   1   48.45    1.47
   3  -1   1   43.30    1.67
  -3  -1  -1   46.09    1.48
  -3   1  -1   46.94    1.49
  -3   1  -1   46.98    1.48
   3   1   1   45.50    1.46
  -3   1  -1   45.77    1.44
  -3  -1   1   48.97    1.51
   3   1   1   49.30    1.52
   3   1   1   45.76    1.51
   3   2  -1   50.08    1.73
  -3   2   1   51.54    1.65
   3  -2   1   57.29    1.72
   3   2  -1   51.78    1.72
   3   2   1   52.34    1.68
   3   2   1   55.32    1.74
  -3   2  -1   51.95    1.71
  -3   2  -1   51.03    1.65
   3   2   1   51.07    1.74
   3   3  -1   10.65    0.47
   3   3  -1   10.75    0.48
   3   3  -1   11.17    0.50
  -3   3   1    9.81    0.44
  -3   3  -1   10.09    0.44
  -3   3  -1   10.92    0.48
   3   3   1   10.63    0.47
   3   4  -1   38.07    1.38
   3   4  -1   38.66    1.44
   3   4  -1   40.37    1.43
  -3   4   1   37.24    1.34
  -3   4  -1   40.65    1.35
   3   4   1   37.77    1.39
  -3   4  -1   40.30    1.43
   3   5  -1   37.81    1.39
  -3   5   1   37.86    1.35
   3   5  -1   35.42    1.45
   3   5  -1   38.10    1.43
  -3   5  -1   37.52    1.34
  -3   5  -1   35.70    1.43
   3   5   1   37.66    1.39
   3   6  -1   30.29    1.35
  -3   6   1   32.13    1.23
   3   6  -1   31.59    1.27
  -3   6  -1   31.56    1.22
   3   6   1   32.01    1.29
   3   7  -1   11.06    0.69
  -3   7   1   12.90    0.68
  -3   7  -1   13.75    0.69
   3   7   1   12.08    0.71
  -3   8   1   19.13    0.95
   3   8  -1   21.21    1.05
  -3   8  -1   19.72    0.95
   3   8   1   20.86    1.05
   3   0   2    0.18    0.05
   3   0   2    0.02    0.04
  -3   0  -2   -0.01    0.04
   3   0  -2    0.06    0.03
  -3   0   2    0.00    0.02
   3   0   2    0.02    0.03
   3   0  -2    0.05    0.03
  -3   0  -2    0.04    0.04
  -3   0   2    0.02    0.04
  -3   1   2   62.68    2.05
   3  -1   2   64.73    1.96
   3   1  -2   59.71    2.00
   3  -1   2   59.80    2.22
  -3   1   2   61.04    1.92
  -3  -1  -2   61.54    2.24
  -3  -1   2   63.96    2.00
   3   1   2   63.42    2.04
   3   1   2   60.53    1.94
  -3  -1   2   59.71    2.17
  -3   1  -2   61.38    1.96
  -3   1  -2   60.38    2.22
  -3   1  -2   62.93    1.96
  -3   2   2   34.31    1.14
   3   2  -2   32.93    1.20
   3   2  -2   35.86    1.19
   3  -2   2   33.25    1.32
  -3   2  -2   34.23    1.17
   3   2   2   35.79    1.22
  -3   2  -2   35.73    1.12
   3   2   2   33.60    1.17
  -3   3   2   50.07    1.67
   3   3  -2   50.67    1.75
   3   3  -2   51.75    1.72
   3   3   2   50.59    1.75
  -3   3  -2   50.05    1.72
  -3   3  -2   50.08    1.65
   3   3   2   51.39    1.71
  -3   3  -2   50.12    1.65
   3   4  -2   11.80    0.59
   3   4  -2   11.02    0.54
   3   4  -2   11.17    0.54
  -3   4   2   10.89    0.52
  -3   4  -2   11.13    0.55
   3   4   2   11.78    0.56
  -3   4  -2   11.69    0.52
   3   5  -2   33.38    1.36
  -3   5   2   34.54    1.27
   3   5  -2   34.99    1.32
   3   5  -2   33.04    1.29
  -3   5  -2   33.80    1.25
   3   5   2   33.44    1.31
  -3   5  -2   35.35    1.35
  -3   6   2   15.97    0.75
   3   6  -2   15.86    0.79
   3   6  -2   16.40    0.81
   3   6  -2   14.79    0.83
   3   6   2   16.78    0.82
  -3   6  -2   16.97    0.85
  -3   6  -2   16.33    0.75
   3   7  -2    7.84    0.56
   3   7  -2    7.72    0.61
  -3   7   2    9.18    0.55
   3   7   2    8.46    0.59
  -3   7  -2    7.95    0.52
  -3   8   2    5.67    0.49
   3   8  -2    6.18    0.54
   3   8   2    5.98    0.54
  -3   8  -2    6.97    0.51
  -3   0   3    0.07    0.02
  -3   0  -3   -0.03    0.04
   3   0   3   -0.03    0.04
   3   0   3    0.03    0.03
   3   0   3    0.08    0.06
   3   0  -3    0.03    0.04
  -3   0   3    0.03    0.05
   3  -1   3   47.96    1.74
  -3   1   3   47.33    1.61
  -3   1   3   48.13    1.51
   3   1  -3   44.58    1.57
  -3  -1  -3   45.33    1.76
   3   1  -3   44.63    1.66
   3   1   3   44.75    1.52
  -3  -1   3   47.64    1.67
  -3   1  -3   46.33    1.52
   3   1   3   47.77    1.61
  -3   1  -3   47.52    1.49
  -3   1  -3   44.66    1.73
  -3  -1   3   46.87    1.57
   3  -2   3    1.40    0.17
  -3   2   3    1.28    0.14
  -3   2   3    1.49    0.17
   3   2  -3    2.37    0.19
   3   2   3    1.24    0.15
  -3   2  -3    2.02    0.16
   3   2   3    1.29    0.16
  -3  -2   3    1.32    0.13
   3   3  -3   14.56    0.59
  -3   3   3   12.81    0.57
   3   3  -3   13.47    0.62
   3  -3   3   12.65    0.65
   3   3   3   12.90    0.60
  -3   3  -3   14.38    0.60
   3   3   3   13.76    0.63
  -3   3  -3   13.98    0.57
  -3   3  -3   14.37    0.52
   3   4  -3   35.79    1.37
   3   4  -3   36.48    1.31
  -3   4   3   35.59    1.28
   3   4  -3   34.83    1.30
  -3   4  -3   36.20    1.24
   3   4   3   36.61    1.33
  -3   4  -3   33.36    1.25
  -3   4  -3   34.83    1.32
   3   5  -3   31.17    1.22
  -3   5   3   32.65    1.21
   3   5  -3   30.13    1.29
   3   5  -3   31.24    1.23
  -3   5  -3   29.61    1.17
  -3   5  -3   31.69    1.27
   3   5   3   32.40    1.26
   3   6  -3   26.46    1.17
   3   6  -3   25.71    1.09
  -3   6   3   23.64    1.03
   3   6  -3   25.48    1.09
  -3   6  -3   24.14    1.02
   3   6   3   23.53    1.08
  -3   6  -3   24.77    1.12
   3   7  -3   16.38    0.86
  -3   7   3   17.04    0.83
   3   7  -3   15.35    0.92
  -3   7  -3   16.14    0.91
  -3   7  -3   14.81    0.78
   3   7   3   17.31    0.89
   3   8  -3   15.95    0.90
  -3   8   3   15.37    0.83
   3   8  -3   15.48    0.99
  -3   8  -3   15.77    0.83
   3   8   3   17.34    0.94
   3   0  -4    0.08    0.06
  -3   0  -4    0.11    0.08
  -3   0   4    0.20    0.09
   3   0   4    0.08    0.08
   3   0   4    0.08    0.03
   3   0   4    0.12    0.08
  -3   1   4    7.48    0.31
  -3  -1  -4    7.52    0.44
   3   1  -4    7.43    0.27
   3   1  -4    7.73    0.37
   3   1  -4    7.70    0.41
   3  -1   4    8.20    0.44
  -3   1   4    8.02    0.42
  -3   1  -4    7.02    0.42
  -3  -1   4    8.30    0.40
   3   1   4    8.43    0.40
  -3   1  -4    7.40    0.29
   3  -1  -4    7.18    0.40
  -3   1  -4    7.84    0.37
   3   1   4    7.87    0.41
  -3  -1   4    8.03    0.37
  -3   2   4    9.77    0.45
  -3   2   4    9.48    0.50
  -3  -2  -4    9.30    0.54
   3   2  -4    9.07    0.48
   3  -2   4    9.67    0.52
  -3   2  -4    9.53    0.45
  -3   2  -4    9.38    0.39
   3   2   4   10.21    0.51
  -3  -2   4    9.62    0.46
   3   2   4    9.62    0.47
  -3   3   4    8.41    0.50
   3   3  -4    8.57    0.49
   3  -3   4    9.10    0.53
   3   3  -4    9.07    0.45
  -3   3   4    8.69    0.45
  -3   3  -4    9.18    0.38
   3   3   4    9.13    0.50
  -3   3  -4    9.65    0.47
  -3  -3   4    8.77    0.46
   3   3   4    8.71    0.48
   3   4  -4   19.49    0.79
  -3   4   4   18.55    0.80
   3   4  -4   19.31    0.86
  -3  -4   4   20.15    0.87
   3   4   4   17.90    0.86
  -3   4  -4   17.91    0.82
  -3   4  -4   18.17    0.78
   3   4   4   17.36    0.82
  -3   4  -4   19.45    0.72
   3   5  -4   24.46    1.04
   3   5  -4   24.35    1.01
  -3   5   4   24.35    1.01
   3   5  -4   24.11    1.09
  -3   5  -4   24.63    1.06
  -3   5  -4   24.76    1.00
   3   5   4   25.25    1.08
  -3   5  -4   24.41    0.94
  -3   6   4    6.37    0.44
   3   6  -4    5.27    0.47
   3   6  -4    5.86    0.45
   3   6  -4    5.97    0.46
  -3   6  -4    5.80    0.48
  -3   6  -4    6.14    0.43
   3   6   4    5.58    0.46
   3   7  -4   19.52    0.98
   3   7  -4   19.53    0.98
   3   7  -4   18.70    1.05
  -3   7   4   19.51    0.93
  -3   7  -4   19.94    0.92
  -3   7  -4   20.14    1.04
   3   7   4   19.45    1.00
   3   8  -4    7.26    0.69
   3   8  -4    6.23    0.56
  -3   8   4    7.32    0.56
  -3   8  -4    7.32    0.55
   3   8   4    6.79    0.60
   3   0   5    0.01    0.08
   3   0   5    0.16    0.09
  -3   0  -5    0.02    0.08
   3   0  -5    0.02    0.07
  -3   0   5   -0.02    0.08
  -3   1   5    3.33    0.28
   3   1  -5    2.83    0.22
  -3   1   5    3.05    0.17
   3   1  -5    2.80    0.25
   3  -1   5    3.66    0.29
  -3  -1  -5    2.85    0.28
  -3  -1   5    3.35    0.23
  -3   1  -5    2.88    0.26
  -3  -1   5    3.22    0.26
   3   1   5    3.34    0.28
   3   1   5    3.94    0.29
  -3   1  -5    3.17    0.24
   3  -1  -5    2.60    0.24
  -3   2   5    1.10    0.19
  -3  -2  -5    1.21    0.21
   3  -2   5    1.11    0.19
   3   2  -5    0.96    0.17
  -3  -2   5    1.30    0.16
  -3   2  -5    1.03    0.10
  -3   2  -5    1.18    0.16
  -3  -2   5    1.06    0.16
   3   2   5    0.95    0.17
   3   2   5    0.97    0.18
  -3   3   5   16.16    0.77
   3   3  -5   19.60    0.79
  -3   3   5   17.51    0.87
   3  -3   5   18.44    0.90
   3   3  -5   18.77    0.84
  -3  -3  -5   20.12    0.97
  -3   3  -5   19.72    0.70
  -3   3  -5   19.67    0.72
  -3   3  -5   18.95    0.80
  -3  -3   5   18.84    0.83
   3   3   5   17.22    0.85
   3   3   5   16.87    0.80
   3   4  -5   15.08    0.67
  -3   4   5   13.33    0.67
   3   4  -5   14.28    0.73
  -3   4  -5   14.40    0.63
   3   4   5   14.22    0.76
  -3   4  -5   15.10    0.59
  -3   4  -5   14.12    0.67
  -3  -4   5   14.58    0.73
  -3   4  -5   14.37    0.70
   3   4   5   13.59    0.71
   3   5  -5   15.17    0.81
   3   5  -5   14.04    0.74
   3   5  -5   16.52    0.74
  -3   5   5   15.10    0.74
  -3   5  -5   15.12    0.77
  -3   5  -5   14.38    0.71
   3   5   5   14.34    0.77
   3   6  -5   18.65    0.88
  -3   6   5   19.56    0.89
   3   6  -5   17.50    0.96
   3   6  -5   16.95    0.88
   3   6   5   18.84    0.95
  -3   6  -5   16.84    0.91
  -3   6  -5   18.12    0.85
  -3   7   5    8.34    0.58
   3   7  -5    8.08    0.66
   3   7  -5    7.39    0.58
  -3   7  -5    9.55    0.59
  -3   7  -5    9.51    0.67
  -3   7  -5    8.97    0.63
   3   7   5   10.25    0.69
  -3   0   6    0.06    0.10
   3   0  -6    0.02    0.08
   3   0   6    0.13    0.11
  -3   0  -6   -0.02    0.09
  -3   1   6    2.68    0.14
   3   1  -6    2.54    0.27
   3  -1   6    3.34    0.32
   3  -1   6    2.94    0.30
  -3  -1  -6    2.97    0.30
  -3   1   6    3.12    0.30
   3   1  -6    2.67    0.23
   3   1   6    2.57    0.29
  -3   1  -6    2.82    0.26
   3  -1  -6    2.65    0.27
  -3   1  -6    2.82    0.28
  -3  -1   6    2.88    0.28
   3  -2   6    4.43    0.37
  -3   2   6    3.03    0.24
   3   2  -6    3.21    0.32
  -3  -2  -6    2.99    0.35
  -3   2   6    3.63    0.34
  -3  -2   6    3.78    0.32
  -3   2  -6    3.49    0.29
  -3  -2   6    4.15    0.30
   3   2   6    4.42    0.35
   3  -2  -6    3.25    0.32
   3   2   6    3.10    0.33
   3   3  -6   16.53    0.71
  -3  -3  -6   15.06    0.85
  -3   3   6   14.67    0.79
   3   3  -6   14.34    0.75
  -3   3  -6   14.16    0.58
  -3   3  -6   15.93    0.62
  -3  -3   6   16.39    0.75
   3   3   6   14.90    0.79
   3   3   6   14.08    0.73
  -3   3  -6   14.65    0.71
   3   4  -6    7.44    0.44
   3   4  -6    6.65    0.49
  -3   4   6    6.96    0.54
  -3   4   6    7.14    0.47
  -3  -4  -6    6.22    0.54
   3   4   6    5.77    0.48
  -3   4  -6    6.68    0.45
   3   4   6    6.80    0.49
  -3   4  -6    7.02    0.38
   3   5  -6    7.60    0.56
  -3   5   6    8.26    0.53
  -3  -5  -6    8.08    0.65
   3   5  -6    7.70    0.54
   3   5  -6    8.25    0.50
  -3   5  -6    8.56    0.56
  -3   5  -6    7.77    0.47
   3   5   6    8.45    0.58
  -3   5  -6    7.61    0.50
   3   6  -6    9.73    0.63
  -3   6   6    9.87    0.62
   3   6  -6    9.63    0.69
  -3   6  -6    9.91    0.66
   3   6   6   10.40    0.68
  -3   6  -6   10.05    0.61
  -3   7   6    4.57    0.46
   3   7  -6    5.12    0.50
   3   7  -6    4.83    0.56
  -3   7  -6    5.10    0.54
  -3   7  -6    4.16    0.43
   3   7   6    3.96    0.48
  -3   0  -7    0.03    0.11
   3   0   7    0.09    0.13
  -3   0   7    0.26    0.14
   3   0  -7    0.08    0.10
  -3  -1  -7    3.25    0.34
   3   1  -7    3.54    0.35
   3   1  -7    3.39    0.28
   3  -1   7    3.88    0.35
  -3   1   7    3.64    0.36
  -3  -1   7    3.69    0.33
  -3   1  -7    2.93    0.29
  -3   1  -7    3.62    0.34
   3  -1  -7    3.60    0.33
   3   1   7    3.18    0.34
   3   2  -7    5.92    0.44
   3  -2   7    5.39    0.44
  -3  -2  -7    5.94    0.49
  -3   2   7    4.33    0.41
  -3   2  -7    6.13    0.41
   3   2   7    5.85    0.46
   3  -2  -7    6.16    0.46
  -3  -2   7    5.39    0.41
   3   3  -7   15.27    0.79
  -3  -3  -7   15.74    0.90
  -3   3   7   13.98    0.81
   3  -3  -7   14.46    0.84
   3   3   7   14.08    0.81
  -3  -3   7   13.30    0.73
   3   3   7   14.42    0.77
  -3   3  -7   16.29    0.76
   3   4  -7   15.62    0.88
   3   4  -7   18.16    0.82
  -3   4   7   17.92    0.98
  -3   4   7   17.37    0.80
  -3  -4  -7   16.09    1.00
  -3   4  -7   18.96    0.88
   3  -4  -7   17.74    1.01
   3   4   7   18.16    0.91
  -3  -4   7   17.46    0.86
   3   4   7   18.04    0.96
   3   5  -7    4.55    0.47
  -3   5  -7    4.42    0.45
   3   5   7    5.06    0.52
  -3   5  -7    4.39    0.41
   3   5   7    4.68    0.46
   3   6  -7    9.07    0.69
  -3   6  -7    8.97    0.66
   3   6   7    7.47    0.61
  -3   6  -7    8.68    0.58
  -3   0  -8    0.25    0.15
  -3   0  -8    0.07    0.12
   3   0   8    0.29    0.17
  -3   0   8    0.20    0.15
   3   0  -8    0.12    0.14
   3   0  -8    0.21    0.15
   3   1  -8    9.50    0.60
  -3   1   8    8.55    0.60
  -3  -1  -8    8.02    0.59
   3  -1   8    9.24    0.61
   3  -1  -8    7.96    0.56
  -3  -1   8    8.74    0.57
  -3   1  -8    9.75    0.60
   3   1   8    8.92    0.61
  -3   1  -8    9.84    0.57
  -3  -2  -8    0.37    0.21
  -3   2   8    0.24    0.18
   3   2  -8    0.23    0.17
   3  -2   8    0.29    0.19
   3  -2  -8    0.18    0.17
  -3  -2   8    0.25    0.15
  -3   2  -8    0.25    0.15
   3   2   8    0.39    0.20
  -3  -3  -8    0.70    0.27
   3  -3   8    1.20    0.26
  -3   3   8    0.78    0.26
   3   3  -8    0.74    0.22
   3  -3  -8    0.99    0.27
   3   3   8    1.23    0.29
  -3   3  -8    0.55    0.21
  -3  -3   8    1.41    0.26
   3   4  -8    9.72    0.67
  -3   4   8    8.74    0.68
  -3  -4   8    9.14    0.60
   3  -4  -8    9.53    0.72
  -3   4  -8    9.95    0.64
   3   4   8    8.27    0.61
   3   4   8    8.79    0.67
   3   5  -8    3.65    0.47
   3   5   8    4.79    0.54
  -3  -5   8    3.35    0.40
  -3   5  -8    3.74    0.44
   3   5   8    3.91    0.46
  -3   5  -8    4.17    0.42
   3   0  -9   -0.04    0.14
  -3   0   9   -0.13    0.14
  -3   0  -9    0.09    0.15
   3   0   9    0.15    0.17
  -3   0  -9   -0.04    0.17
   3  -1   9    0.05    0.17
   3   1  -9    0.20    0.18
  -3  -1  -9    0.04    0.18
  -3   1   9   -0.04    0.15
  -3   1  -9    0.05    0.15
   3   1   9    0.35    0.21
  -3  -1   9    0.25    0.19
  -3   2   9    5.04    0.51
  -3  -2  -9    4.60    0.51
   3   2  -9    4.65    0.48
   3  -2   9    5.48    0.53
   3   2   9    5.00    0.51
  -3   2  -9    4.86    0.44
  -3  -2   9    4.89    0.46
  -3   3   9    6.14    0.58
   3  -3   9    6.60    0.57
   3   3  -9    7.06    0.56
  -3   3  -9    6.63    0.53
   3   3   9    5.76    0.55
  -3  -3   9    6.66    0.54
   3  -4   9    3.64    0.47
   3   4  -9    4.59    0.50
  -3   4   9    4.79    0.55
  -3  -4   9    3.36    0.42
   3   4   9    4.17    0.51
  -3   4  -9    5.24    0.50
  -3   0  10   -0.10    0.20
   3   0 -10    0.03    0.18
   3   0  10    0.12    0.21
  -3   0 -10   -0.07    0.19
   3   1 -10    1.81    0.35
  -3   1  10    1.59    0.35
   3  -1  10    1.91    0.38
  -3  -1 -10    1.99    0.34
   3   1  10    1.51    0.35
  -3   1 -10    2.39    0.36
  -3  -1  10    2.20    0.38
   3   2 -10    0.41    0.24
   3  -2  10    0.43    0.24
  -3   2  10    0.64    0.28
  -3  -2  10    0.49    0.24
   3   2  10    0.26    0.24
   3  -3  10    3.66    0.48
  -3   3  10    4.59    0.55
   3   3 -10    3.11    0.46
  -3  -3  10    3.76    0.47
   3   3  10    3.46    0.49
  -4   0   0  145.28    4.54
   4   0   0  150.71    4.53
  -4   0   0  143.54    5.08
   4   0   0  143.01    5.07
  -4  -1   0  145.83    4.59
   4   1   0  142.30    4.62
  -4   1   0  137.94    4.41
   4   1   0  137.26    4.41
  -4   1   0  142.03    4.58
   4   1   0  138.05    4.27
  -4  -1   0  142.82    4.37
   4  -1   0  144.87    4.27
   4   2   0    6.44    0.31
  -4   2   0    6.63    0.27
   4   2   0    6.05    0.31
   4  -2   0    7.00    0.31
   4   2   0    6.69    0.30
   4   3   0  117.49    3.87
  -4   3   0  123.53    3.71
   4   3   0  118.74    3.85
   4   3   0  121.43    3.75
  -4   4   0   63.46    2.02
   4   4   0   61.19    2.15
   4   4   0   61.95    2.14
   4   4   0   60.85    2.07
  -4   5   0    9.78    0.48
   4   5   0    9.13    0.55
   4   5   0    8.33    0.50
  -4   6   0    5.77    0.39
   4   6   0    4.89    0.40
  -4   7   0    5.92    0.43
   4   7   0    5.76    0.48
   4   8   0    2.43    0.38
  -4   8   0    2.46    0.33
   4   0  -1  248.31    7.45
  -4   0   1  242.44    7.59
  -4   0   1  231.43    7.46
   4   0   1  240.71    7.25
   4   0   1  242.31    7.48
   4   0   1  231.30    8.31
  -4   0  -1  230.17    8.31
  -4   0  -1  248.82    7.45
  -4   0  -1  233.86    7.46
   4   0  -1  255.74    7.58
   4   0   1  244.25    7.45
  -4  -1  -1   56.38    1.74
  -4   1   1   55.57    1.80
  -4  -1  -1   55.49    1.78
   4  -1   1   58.27    1.77
   4  -1   1   53.64    2.01
   4  -1   1   61.91    1.86
   4   1  -1   51.61    1.80
  -4   1  -1   55.33    1.72
  -4   1  -1   54.84    1.80
  -4   1  -1   56.17    1.77
   4   1   1   57.42    1.75
  -4  -1   1   56.67    1.81
   4   1   1   56.12    1.81
   4   1   1   58.18    1.83
   4  -2   1  150.03    4.46
   4   2  -1  141.95    4.50
   4   2  -1  139.44    4.49
  -4   2   1  141.41    4.34
  -4   2  -1  144.72    4.34
  -4   2  -1  144.75    4.46
   4   2   1  144.55    4.56
   4   2   1  142.76    4.38
   4   2   1  140.31    4.48
   4   2   1  140.67    4.52
  -4   3   1   85.46    2.71
   4   3  -1   89.36    2.84
   4   3  -1   86.52    2.83
   4   3  -1   83.85    2.74
   4   3   1   87.18    2.84
   4   3   1   85.18    2.75
  -4   3  -1   86.21    2.70
  -4   3  -1   87.91    2.81
   4   3   1   87.64    2.86
  -4   4   1   45.02    1.55
   4   4  -1   45.86    1.65
   4   4  -1   44.87    1.67
   4   4  -1   47.28    1.61
  -4   4  -1   47.15    1.65
  -4   4  -1   47.24    1.56
   4   4   1   46.83    1.62
   4   5  -1   10.05    0.56
   4   5  -1   10.53    0.60
   4   5  -1    9.11    0.53
  -4   5   1   10.78    0.51
   4   5   1   10.51    0.56
  -4   5  -1    8.90    0.49
  -4   6   1    9.76    0.53
   4   6  -1   10.45    0.64
   4   6  -1    9.28    0.56
   4   6   1    9.63    0.58
  -4   6  -1    9.46    0.52
  -4   7   1    3.00    0.32
   4   7  -1    2.11    0.32
   4   7   1    2.16    0.33
  -4   7  -1    3.14    0.33
   4   8  -1    0.07    0.20
  -4   8   1    0.29    0.20
   4   8   1    0.25    0.22
  -4   8  -1    0.20    0.19
   4   0   2   37.10    1.45
   4   0   2   36.25    1.24
   4   0   2   38.40    1.26
  -4   0   2   39.94    1.32
  -4   0  -2   42.96    1.25
   4   0  -2   43.80    1.26
  -4   0   2   36.10    1.25
  -4   0  -2   38.82    1.46
   4   1  -2  123.61    4.11
   4  -1   2  131.68    4.60
   4  -1   2  141.03    4.07
  -4   1   2  131.60    4.10
  -4   1   2  134.64    4.21
  -4  -1  -2  117.58    4.60
  -4  -1   2  128.94    4.59
  -4   1  -2  128.60    4.06
  -4  -1   2  133.93    4.17
  -4   1  -2  124.66    4.60
   4   1   2  139.15    4.21
   4   1   2  134.27    4.01
  -4   1  -2  134.12    3.98
  -4   1  -2  130.69    4.09
  -4   2   2   86.98    2.70
   4  -2   2   89.22    2.77
   4  -2   2   84.12    3.12
   4   2  -2   85.24    2.81
   4   2  -2   87.52    2.80
  -4   2  -2   90.19    2.77
  -4   2  -2   83.71    2.69
   4   2   2   90.30    2.85
   4   2   2   85.77    2.74
  -4   2  -2   86.90    2.72
  -4   3   2   66.18    2.16
   4   3  -2   68.41    2.25
   4   3  -2   67.08    2.27
  -4   3  -2   69.86    2.24
   4   3   2   67.97    2.28
   4   3   2   67.16    2.21
  -4   3  -2   67.02    2.16
   4   4  -2   15.80    0.69
   4   4  -2   15.72    0.73
   4   4  -2   14.97    0.68
  -4   4   2   16.82    0.66
   4   4   2   15.84    0.70
  -4   4  -2   15.61    0.70
  -4   4  -2   14.78    0.63
   4   5  -2   20.72    0.96
  -4   5   2   21.93    0.87
   4   5  -2   21.69    0.93
   4   5  -2   19.98    0.90
  -4   5  -2   21.31    0.93
  -4   5  -2   21.55    0.86
   4   5   2   21.61    0.93
   4   6  -2    3.00    0.36
   4   6  -2    2.49    0.30
  -4   6   2    2.50    0.28
   4   6  -2    2.83    0.33
   4   6   2    2.71    0.32
  -4   6  -2    2.78    0.28
  -4   6  -2    2.46    0.32
  -4   7   2    1.31    0.24
   4   7  -2    1.16    0.26
   4   7  -2    1.19    0.31
   4   7   2    1.09    0.26
  -4   7  -2    1.05    0.22
  -4   8   2    1.87    0.30
   4   8  -2    2.12    0.35
  -4   8  -2    2.11    0.31
   4   8   2    1.73    0.36
  -4   0  -3   97.27    3.65
  -4   0   3  105.93    3.34
   4   0   3  105.98    3.67
  -4   0   3  100.28    3.21
   4   0   3  104.80    3.21
   4   0  -3  107.65    3.20
   4   0   3  104.15    3.18
   4   0  -3   95.08    3.58
   4   1  -3   59.02    1.97
  -4   1   3   58.26    1.89
   4  -1   3   59.06    2.18
  -4   1   3   61.09    2.01
  -4  -1   3   56.27    1.95
  -4  -1   3   57.68    2.08
  -4   1  -3   60.74    1.88
  -4   1  -3   59.49    2.18
   4   1   3   57.74    1.99
  -4   1  -3   60.67    1.90
   4   1   3   57.96    1.90
   4  -2   3  132.45    4.72
  -4   2   3  135.30    4.35
   4   2  -3  131.50    4.24
  -4   2   3  128.54    4.09
  -4   2  -3  139.15    4.13
  -4  -2   3  129.58    4.63
  -4   2  -3  136.81    4.18
  -4   2  -3  134.05    4.18
   4   2   3  126.49    4.12
   4   2   3  134.01    4.33
   4   3  -3   69.33    2.33
  -4   3   3   67.63    2.25
   4  -3   3   74.03    2.63
   4   3  -3   68.20    2.36
  -4   3  -3   70.21    2.32
  -4   3  -3   70.31    2.23
   4   3   3   70.33    2.32
   4   3   3   70.94    2.40
  -4   3  -3   69.20    2.25
  -4   4   3   39.91    1.41
   4   4  -3   41.13    1.47
   4   4  -3   38.87    1.45
   4   4  -3   41.58    1.53
   4   4   3   39.48    1.47
  -4   4  -3   40.44    1.37
  -4   4  -3   40.00    1.47
  -4   4  -3   40.37    1.40
   4   5  -3   11.53    0.60
   4   5  -3   10.93    0.59
   4   5  -3   11.40    0.64
  -4   5   3   10.27    0.55
  -4   5  -3   11.69    0.56
  -4   5  -3   11.52    0.61
   4   5   3   10.77    0.61
   4   6  -3    8.47    0.60
  -4   6   3    8.69    0.52
   4   6  -3    8.44    0.55
   4   6  -3    9.01    0.56
   4   6   3    9.29    0.58
  -4   6  -3    8.94    0.51
  -4   6  -3    8.75    0.57
  -4   7   3    4.77    0.41
   4   7  -3    4.77    0.51
   4   7  -3    4.74    0.45
   4   7   3    5.83    0.50
  -4   7  -3    5.10    0.41
   4   8  -3    1.36    0.37
  -4   8   3    0.97    0.26
   4   8  -3    1.23    0.31
  -4   8  -3    0.89    0.25
   4   8   3    1.23    0.31
  -4   0   4  123.40    3.89
   4   0   4  125.52    4.27
   4   0  -4  109.97    4.16
  -4   0  -4  110.01    4.24
   4   0   4  125.15    3.70
   4   1  -4   48.19    1.52
   4   1  -4   48.20    1.73
  -4   1   4   48.15    1.55
   4  -1   4   48.95    1.84
  -4   1   4   49.79    1.70
   4   1  -4   46.15    1.66
  -4  -1  -4   47.71    1.85
   4   1   4   46.96    1.69
  -4  -1   4   46.78    1.65
  -4  -1   4   46.45    1.72
  -4   1  -4   45.36    1.82
   4   1   4   49.37    1.62
  -4   1  -4   48.11    1.60
  -4   1  -4   47.57    1.53
  -4   2   4   22.14    0.90
   4  -2   4   23.45    0.95
   4   2  -4   19.20    0.85
  -4   2  -4   19.79    0.74
   4   2   4   21.15    0.88
   4   2   4   21.12    0.84
  -4  -2   4   23.09    0.86
  -4   2  -4   19.61    0.80
   4   3  -4   69.10    2.49
   4   3  -4   74.70    2.45
   4  -3   4   73.94    2.76
  -4   3   4   69.58    2.37
  -4   3   4   70.62    2.56
  -4   3  -4   76.20    2.34
   4   3   4   73.42    2.54
  -4   3  -4   73.57    2.40
  -4   3  -4   74.36    2.44
   4   3   4   73.01    2.44
  -4  -3   4   74.73    2.66
   4   4  -4   12.58    0.60
  -4   4   4   11.24    0.57
   4   4  -4   11.57    0.63
  -4   4  -4   12.04    0.60
  -4  -4   4   13.60    0.63
  -4   4  -4   11.66    0.50
   4   4   4   11.87    0.63
   4   4   4   11.53    0.63
  -4   4  -4   11.54    0.56
   4   5  -4    2.62    0.30
  -4   5   4    3.38    0.30
   4   5  -4    2.35    0.27
   4   5  -4    3.03    0.35
   4   5   4    3.27    0.34
  -4   5  -4    2.95    0.28
  -4   5  -4    3.39    0.33
   4   6  -4    4.64    0.46
   4   6  -4    5.36    0.43
  -4   6   4    4.27    0.38
   4   6  -4    4.74    0.41
  -4   6  -4    4.80    0.43
   4   6   4    4.42    0.44
  -4   6  -4    4.89    0.38
   4   7  -4    3.45    0.46
   4   7  -4    4.38    0.45
   4   7  -4    4.97    0.46
  -4   7   4    4.23    0.41
  -4   7  -4    4.38    0.39
   4   7   4    4.03    0.46
  -4   7  -4    4.30    0.46
  -4   8   4    1.00    0.28
   4   8  -4    0.86    0.29
   4   8  -4    0.93    0.35
  -4   8  -4    1.46    0.34
   4   8   4    0.87    0.31
  -4   8  -4    0.97    0.26
  -4   0   5   42.28    1.56
  -4   0  -5   42.12    1.70
   4   0  -5   41.89    1.62
   4   0   5   45.82    1.72
   4   0   5   42.70    1.58
   4   1  -5   51.13    1.82
   4  -1   5   54.78    2.02
  -4   1   5   52.31    1.66
   4   1  -5   52.25    1.89
  -4  -1  -5   51.55    2.02
  -4   1   5   50.52    1.86
   4   1   5   49.54    1.76
  -4   1  -5   53.72    1.76
   4   1   5   48.95    1.85
   4  -1  -5   51.37    1.96
  -4  -1   5   49.97    1.81
  -4   1  -5   52.01    2.00
   4  -2   5   91.47    3.20
  -4   2   5   83.91    2.96
   4   2  -5   83.67    2.88
  -4  -2  -5   83.18    3.23
  -4   2   5   88.43    2.76
  -4  -2   5   87.17    3.07
  -4   2  -5   86.44    2.72
   4   2   5   84.72    2.95
  -4  -2   5   83.09    2.88
  -4   2  -5   84.82    2.81
   4   2   5   84.41    2.81
   4   3  -5   21.82    0.95
   4  -3   5   21.63    1.02
   4   3  -5   21.92    0.89
  -4  -3  -5   22.36    1.07
  -4   3   5   19.57    0.86
  -4   3   5   20.47    0.97
  -4  -3   5   22.17    0.93
   4   3   5   20.54    0.91
  -4   3  -5   21.64    0.81
   4   3   5   20.75    0.95
  -4   3  -5   22.08    0.89
  -4   3  -5   23.31    0.78
  -4   4   5   20.80    0.90
   4   4  -5   20.11    0.96
   4   4  -5   22.16    0.91
  -4   4  -5   21.58    0.93
   4   4   5   22.07    0.97
  -4   4  -5   20.95    0.88
  -4  -4   5   23.58    0.98
   4   4   5   20.38    0.98
  -4   4  -5   21.75    0.79
  -4   4  -5   21.97    0.86
  -4   5   5    8.39    0.51
   4   5  -5    8.43    0.54
   4   5  -5    8.43    0.58
   4   5  -5    8.47    0.51
  -4   5  -5    8.39    0.49
   4   5   5    9.05    0.57
  -4   5  -5    8.31    0.54
  -4   5  -5    8.12    0.49
  -4   6   5    3.54    0.36
   4   6  -5    3.26    0.36
   4   6  -5    3.04    0.39
   4   6  -5    3.47    0.37
  -4   6  -5    3.16    0.38
  -4   6  -5    3.20    0.32
  -4   6  -5    3.72    0.36
   4   6   5    3.32    0.40
   4   7  -5    1.23    0.33
  -4   7   5    0.46    0.21
   4   7  -5    0.78    0.26
  -4   7  -5    0.79    0.23
  -4   7  -5    0.78    0.27
   4   7   5    0.54    0.25
  -4   7  -5    0.75    0.26
   4   0   6   15.18    0.72
   4   0  -6   13.05    0.65
  -4   0  -6   13.04    0.72
  -4   0   6   15.56    0.71
   4  -1   6   38.39    1.52
   4   1  -6   42.21    1.52
   4  -1   6   42.93    1.66
  -4   1   6   38.35    1.27
   4   1  -6   37.92    1.49
  -4  -1  -6   38.70    1.65
  -4   1   6   38.84    1.53
  -4  -1   6   38.29    1.48
  -4   1  -6   41.54    1.44
   4  -1  -6   39.46    1.58
   4   1   6   37.67    1.52
  -4   1  -6   39.69    1.63
  -4   2   6   30.82    1.25
   4   2  -6   28.71    1.20
  -4  -2  -6   28.67    1.33
  -4   2   6   31.05    1.04
   4  -2   6   32.44    1.32
  -4  -2   6   31.77    1.19
   4   2   6   30.16    1.24
  -4   2  -6   27.49    1.12
   4  -2  -6   26.26    1.26
  -4   2  -6   28.29    0.96
   4   2   6   29.98    1.18
  -4  -2   6   27.59    1.16
   4   3  -6   19.11    0.90
  -4   3   6   19.13    0.78
  -4  -3  -6   18.81    1.01
  -4   3   6   17.26    0.91
  -4   3  -6   19.37    0.72
  -4   3  -6   19.66    0.84
  -4  -3   6   18.45    0.83
  -4  -3   6   20.56    0.87
   4   3   6   17.97    0.87
  -4   3  -6   19.97    0.72
   4   3   6   18.31    0.91
   4   4  -6    4.50    0.40
   4   4  -6    4.24    0.35
  -4  -4  -6    4.90    0.46
  -4   4   6    3.77    0.42
   4   4   6    4.74    0.42
  -4   4  -6    4.83    0.38
   4   4   6    5.21    0.43
  -4   4  -6    4.83    0.31
   4   5  -6   12.90    0.67
  -4  -5  -6   12.42    0.84
   4   5  -6   12.28    0.75
  -4   5   6   11.80    0.66
  -4   5  -6   12.47    0.70
   4   5   6   12.07    0.75
   4   5   6   11.45    0.72
  -4   5  -6   13.04    0.66
  -4   5  -6   13.26    0.63
   4   6  -6    1.42    0.29
   4   6  -6    1.44    0.33
  -4   6   6    1.60    0.28
   4   6   6    1.39    0.31
  -4   6  -6    1.58    0.30
  -4   6  -6    1.25    0.25
  -4   7   6    0.36    0.22
   4   7  -6    0.42    0.23
   4   7  -6    0.47    0.29
  -4   7  -6    0.56    0.27
  -4   7  -6    0.76    0.25
   4   7   6    0.15    0.23
   4   0   7   34.87    1.43
   4   0  -7   34.84    1.42
  -4   0  -7   36.39    1.53
  -4   0   7   33.33    1.40
   4   1  -7   27.09    1.06
   4  -1   7   23.71    1.10
   4   1  -7   23.93    1.07
  -4  -1  -7   24.38    1.17
  -4   1   7   23.72    1.10
  -4   1  -7   25.13    1.03
  -4  -1   7   23.85    1.06
   4   1   7   23.52    1.11
  -4   1  -7   26.44    1.17
   4  -1  -7   26.01    1.12
  -4  -2  -7   18.89    1.00
   4   2  -7   18.29    0.90
  -4   2   7   17.67    0.92
   4  -2  -7   19.02    0.95
   4   2   7   18.85    0.93
  -4  -2   7   18.30    0.86
  -4   2  -7   19.62    0.85
   4   3  -7    9.76    0.61
  -4   3   7    8.10    0.59
  -4  -3  -7    8.37    0.64
  -4   3  -7    8.78    0.53
   4  -3  -7    9.13    0.62
   4   3   7    8.69    0.57
  -4  -3   7    8.23    0.52
   4   3   7    7.91    0.57
  -4   4   7   10.34    0.56
  -4   4   7    9.79    0.68
   4   4  -7    9.87    0.66
  -4  -4  -7   10.95    0.77
   4   4  -7   11.23    0.59
   4   4   7    9.22    0.63
   4   4   7    8.90    0.65
  -4   4  -7    9.58    0.59
   4  -4  -7    9.68    0.71
  -4  -4   7   10.06    0.60
  -4   5   7    7.23    0.52
   4   5  -7    7.20    0.58
  -4   5  -7    7.87    0.55
  -4   5  -7    7.83    0.52
  -4  -5   7    7.59    0.51
   4   5   7    6.89    0.56
   4   5   7    6.38    0.57
  -4   6   7    0.86    0.27
   4   6  -7    0.67    0.25
   4   6  -7    1.69    0.37
   4   6   7    1.01    0.30
  -4   6  -7    1.28    0.26
  -4   6  -7    1.11    0.31
  -4   0  -8   10.97    0.69
  -4   0   8   10.48    0.65
   4   0  -8   11.13    0.66
  -4   0  -8   10.72    0.60
   4   0   8   11.29    0.69
  -4  -1  -8   18.74    1.00
   4  -1   8   19.38    0.97
   4   1  -8   18.49    0.93
  -4   1   8   18.29    0.94
  -4   1  -8   20.13    0.89
  -4   1  -8   19.37    0.97
  -4  -1   8   17.53    0.90
   4  -1  -8   17.82    0.91
   4   1   8   18.68    0.96
  -4  -2  -8    1.51    0.31
   4  -2   8    3.56    0.39
  -4   2   8    2.45    0.34
   4   2  -8    0.94    0.25
   4  -2  -8    2.24    0.32
   4   2   8    1.86    0.32
  -4   2  -8    1.85    0.26
  -4  -2   8    1.99    0.28
  -4  -3  -8   13.34    0.88
  -4   3   8   12.52    0.80
   4   3  -8   13.91    0.80
  -4  -3   8   12.87    0.73
   4   3   8   12.76    0.81
  -4   3  -8   14.74    0.75
   4  -3  -8   14.19    0.85
  -4   4   8    7.30    0.63
   4   4  -8    8.51    0.64
   4   4   8    7.43    0.60
  -4  -4   8    8.25    0.56
   4   4   8    7.62    0.62
   4  -4  -8    8.94    0.70
  -4   4  -8    9.48    0.60
   4   5  -8    5.53    0.55
   4   5   8    4.85    0.55
  -4   5  -8    4.29    0.47
   4   5   8    4.69    0.49
  -4  -5   8    4.86    0.45
  -4   5  -8    4.07    0.42
   4   0   9   10.65    0.72
  -4   0  -9   10.63    0.64
  -4   0  -9   11.80    0.74
  -4   0   9   10.73    0.70
   4   0  -9   10.28    0.67
   4  -1   9   12.84    0.78
  -4  -1  -9   11.94    0.79
   4   1  -9   11.79    0.73
  -4   1   9   11.38    0.74
  -4  -1   9   11.56    0.73
   4   1   9   11.82    0.77
  -4   1  -9   12.77    0.69
   4   2  -9   10.51    0.70
  -4  -2  -9   11.27    0.78
  -4   2   9    9.18    0.68
   4  -2   9    9.76    0.70
  -4   2  -9   11.32    0.66
   4   2   9    9.71    0.71
  -4  -2   9    9.86    0.66
   4   3  -9    1.84    0.32
  -4   3   9    1.32    0.32
   4  -3   9    1.80    0.35
  -4  -3   9    1.41    0.30
  -4   3  -9    2.53    0.36
   4   3   9    1.57    0.35
  -4   4   9    3.30    0.48
   4   4  -9    5.08    0.54
   4  -4   9    5.16    0.54
   4   4   9    4.64    0.53
  -4  -4   9    4.64    0.46
  -4   0  10    0.65    0.25
   4   0 -10    0.93    0.28
   4   0  10    0.81    0.28
  -4   0 -10    0.39    0.23
   4   1 -10    8.15    0.64
  -4   1  10    9.45    0.69
  -4  -1 -10    8.52    0.62
   4  -1  10    9.04    0.69
   4   1  10    7.45    0.65
  -4  -1  10    8.65    0.66
  -4   2  10    3.02    0.46
   4   2 -10    4.03    0.48
   4  -2  10    3.36    0.47
   4   2  10    4.18    0.51
  -4  -2  10    3.78    0.46
   4  -3  10    3.81    0.51
  -4   3  10    3.73    0.51
   4   3 -10    4.34    0.52
  -4  -3  10    3.32    0.44
   4   3  10    3.68    0.52
   5   0   0    0.05    0.03
  -5   0   0   -0.01    0.02
  -5   0   0    0.03    0.03
   5   0   0    0.03    0.02
   5  -1   0   22.67    0.68
  -5  -1   0   21.54    0.74
   5   1   0   22.28    0.73
   5   1   0   21.10    0.74
  -5   1   0   20.86    0.75
   5   1   0   21.58    0.75
   5   2   0   13.36    0.53
   5   2   0   13.06    0.50
  -5  -2   0   13.21    0.46
   5  -2   0   13.29    0.51
  -5   2   0   12.91    0.45
   5   2   0   11.86    0.51
  -5   3   0    0.61    0.09
   5   3   0    0.77    0.14
   5   3   0    0.71    0.12
   5   3   0    0.72    0.13
  -5   4   0   68.65    2.18
   5   4   0   65.99    2.32
   5   4   0   68.48    2.33
   5   5   0   14.40    0.72
   5   5   0   13.99    0.73
   5   5   0   14.09    0.68
  -5   5   0   14.29    0.63
   5   6   0   42.03    1.60
  -5   6   0   41.21    1.50
   5   7   0    5.83    0.47
  -5   7   0    4.51    0.38
  -5   8   0   31.07    1.26
   5   8   0   30.62    1.40
   5   0   1    0.12    0.04
  -5   0   1    0.13    0.04
  -5   0  -1    0.03    0.04
   5   0   1    0.07    0.03
   5   0  -1    0.00    0.03
   5   0   1    0.16    0.03
  -5   0  -1    0.21    0.04
  -5   0   1    0.05    0.03
  -5   0  -1    0.04    0.03
   5   0   1    0.02    0.04
  -5  -1  -1   50.82    1.55
  -5  -1  -1   49.59    1.81
  -5  -1  -1   51.24    1.59
   5   1  -1   48.63    1.62
   5  -1   1   47.92    1.81
  -5   1   1   47.98    1.61
   5  -1   1   52.78    1.62
   5  -1   1   50.67    1.57
  -5  -1   1   51.60    1.61
   5   1   1   50.08    1.62
  -5  -1   1   49.49    1.62
   5   1   1   47.89    1.59
   5   1   1   48.11    1.62
  -5   1  -1   50.79    1.61
  -5   1  -1   50.74    1.54
  -5   1  -1   51.18    1.58
   5   1   1   47.34    1.55
  -5   2   1   14.10    0.49
   5   2  -1   13.19    0.55
   5  -2   1   14.07    0.53
   5   2  -1   13.77    0.56
   5   2   1   13.42    0.56
   5   2   1   14.33    0.52
  -5   2  -1   13.69    0.52
   5   2   1   13.61    0.54
  -5   2  -1   13.39    0.48
   5   2   1   14.13    0.53
  -5   3   1   47.15    1.54
   5   3  -1   46.67    1.64
   5   3  -1   48.11    1.66
   5   3  -1   47.51    1.60
   5   3   1   47.44    1.67
   5   3   1   47.70    1.65
  -5   3  -1   48.53    1.62
  -5   3  -1   48.03    1.54
  -5   4   1    7.41    0.38
   5   4  -1    7.42    0.43
   5   4  -1    7.50    0.41
   5   4  -1    7.21    0.44
   5   4   1    7.42    0.42
  -5   4  -1    7.61    0.37
   5   5  -1   38.72    1.50
   5   5  -1   38.72    1.47
   5   5  -1   37.05    1.41
  -5   5   1   36.98    1.34
  -5   5  -1   37.54    1.34
   5   5   1   38.60    1.44
   5   6  -1    6.43    0.47
  -5   6   1    6.91    0.42
   5   6  -1    6.15    0.50
   5   6  -1    6.56    0.50
   5   6   1    7.00    0.49
  -5   6  -1    6.87    0.42
   5   7  -1   29.80    1.30
  -5   7   1   29.65    1.19
   5   7  -1   29.66    1.39
   5   7   1   30.03    1.31
  -5   7  -1   29.55    1.19
   5   8  -1    3.55    0.43
  -5   8   1    3.34    0.37
   5   8   1    2.35    0.38
  -5   8  -1    3.69    0.37
  -5   0   2    0.04    0.04
  -5   0  -2    0.12    0.04
  -5   0  -2    0.09    0.06
   5   0   2    0.07    0.05
   5   0  -2   -0.02    0.03
   5   0   2    0.06    0.04
  -5   0   2   -0.02    0.03
   5   0   2   -0.02    0.03
   5   1  -2    4.89    0.26
  -5   1   2    4.58    0.25
   5  -1   2    4.31    0.27
  -5  -1  -2    4.26    0.27
  -5   1   2    4.31    0.22
   5  -1   2    4.86    0.20
   5  -1   2    5.01    0.23
   5   1   2    4.47    0.23
  -5  -1   2    4.57    0.21
  -5   1  -2    4.34    0.21
  -5   1  -2    4.19    0.27
   5   1   2    4.64    0.24
  -5   1  -2    4.46    0.20
  -5   1  -2    4.47    0.21
   5  -2   2   37.34    1.22
   5  -2   2   34.27    1.39
  -5   2   2   34.86    1.18
   5   2  -2   35.61    1.25
   5   2  -2   37.36    1.28
   5   2   2   37.41    1.27
  -5   2  -2   37.32    1.22
   5   2   2   36.36    1.23
  -5   2  -2   35.92    1.23
  -5   2  -2   35.55    1.17
   5   3  -2   23.61    0.94
   5   3  -2   24.54    0.92
  -5   3   2   23.63    0.85
  -5   3  -2   24.09    0.85
   5   3   2   24.67    0.92
  -5   3  -2   23.81    0.90
   5   4  -2   18.08    0.76
   5   4  -2   17.41    0.79
  -5   4   2   18.68    0.71
   5   4  -2   16.65    0.76
  -5   4  -2   17.81    0.76
  -5   4  -2   16.70    0.69
   5   4   2   18.27    0.77
   5   5  -2   11.77    0.63
   5   5  -2   12.40    0.67
  -5   5   2   12.21    0.57
   5   5  -2   11.64    0.61
  -5   5  -2   11.71    0.62
  -5   5  -2   12.09    0.56
   5   5   2   12.26    0.64
   5   6  -2   57.71    2.13
   5   6  -2   56.60    2.08
  -5   6   2   57.92    2.00
  -5   6  -2   57.64    1.98
   5   6   2   57.22    2.10
   5   7  -2    0.70    0.25
  -5   7   2    0.82    0.21
   5   7  -2    0.51    0.20
  -5   7  -2    0.51    0.19
   5   7   2    0.82    0.26
  -5   8   2   15.53    0.80
   5   8  -2   15.18    0.89
   5   8   2   16.75    0.94
  -5   8  -2   16.39    0.81
   5   0  -3    0.03    0.04
  -5   0  -3    0.06    0.06
  -5   0   3    0.05    0.03
   5   0   3   -0.02    0.05
   5   0   3    0.02    0.04
   5   0   3    0.04    0.06
  -5   0   3    0.09    0.06
   5   0  -3    0.09    0.04
   5  -1   3    1.79    0.19
  -5   1   3    1.79    0.13
  -5  -1  -3    2.04    0.20
   5   1  -3    2.02    0.18
  -5   1   3    1.87    0.18
  -5   1  -3    2.09    0.14
   5   1   3    2.38    0.19
  -5  -1   3    1.75    0.11
  -5   1  -3    2.36    0.14
   5   1   3    1.88    0.17
  -5   1  -3    2.47    0.20
  -5  -1   3    1.88    0.15
   5   2  -3   11.14    0.52
  -5   2   3   11.63    0.47
  -5   2   3   10.30    0.52
   5  -2   3   10.59    0.55
   5   2   3   10.93    0.51
  -5   2  -3   12.11    0.39
   5   2   3   11.24    0.50
  -5   2  -3   11.78    0.46
  -5  -2   3   10.60    0.47
  -5   2  -3   11.31    0.47
   5   3  -3   41.40    1.47
   5   3  -3   39.57    1.50
   5  -3   3   42.69    1.66
  -5   3   3   40.06    1.39
  -5   3  -3   41.12    1.35
   5   3   3   43.62    1.48
   5   3   3   42.22    1.51
  -5   3  -3   42.51    1.45
  -5   3  -3   40.14    1.39
   5   4  -3   15.55    0.75
   5   4  -3   15.58    0.71
  -5   4   3   16.95    0.67
   5   4  -3   15.04    0.70
  -5   4  -3   15.19    0.65
   5   4   3   16.25    0.73
  -5   4  -3   15.47    0.70
   5   5  -3   34.53    1.29
   5   5  -3   32.20    1.34
  -5   5   3   31.09    1.20
   5   5  -3   30.83    1.26
  -5   5  -3   31.85    1.19
   5   5   3   32.95    1.30
  -5   5  -3   32.57    1.29
   5   6  -3   12.49    0.70
   5   6  -3   13.55    0.78
   5   6  -3   13.91    0.73
  -5   6   3   12.59    0.65
   5   6   3   12.98    0.73
  -5   6  -3   13.05    0.73
  -5   6  -3   13.05    0.64
  -5   7   3   25.55    1.09
   5   7  -3   25.56    1.18
   5   7  -3   27.00    1.30
   5   7  -3   27.86    1.23
   5   7   3   25.77    1.22
  -5   7  -3   25.76    1.09
  -5   8   3    1.98    0.31
   5   8  -3    1.61    0.34
   5   8  -3    1.61    0.40
   5   8   3    1.51    0.34
  -5   8  -3    1.66    0.29
  -5   0   4    0.01    0.07
  -5   0  -4    0.02    0.07
   5   0   4    0.10    0.08
   5   0   4    0.05    0.04
   5   0   4    0.09    0.08
   5   0  -4    0.05    0.05
   5   1  -4   37.80    1.39
  -5  -1  -4   37.45    1.53
  -5   1   4   38.76    1.27
   5   1  -4   38.36    1.39
   5  -1   4   40.59    1.54
  -5   1   4   39.51    1.41
   5   1  -4   39.76    1.24
   5   1   4   36.83    1.39
  -5   1  -4   37.96    1.30
  -5  -1   4   38.74    1.39
  -5   1  -4   38.09    1.25
  -5   1  -4   36.30    1.51
   5   1   4   37.44    1.33
  -5  -1   4   39.27    1.36
  -5   2   4    5.34    0.29
   5   2  -4    5.42    0.35
  -5   2   4    5.35    0.36
  -5  -2  -4    5.25    0.38
   5  -2   4    6.06    0.39
  -5  -2   4    5.32    0.28
  -5   2  -4    6.08    0.24
  -5   2  -4    5.23    0.30
  -5   2  -4    5.32    0.27
   5   2   4    5.59    0.34
  -5  -2   4    5.50    0.31
   5   2   4    5.21    0.34
   5   3  -4    0.60    0.15
  -5   3   4    0.54    0.16
  -5   3   4    0.63    0.13
   5  -3   4    0.83    0.18
   5   3  -4    0.44    0.13
   5   3   4    0.51    0.15
  -5   3  -4    0.73    0.09
   5   3   4    0.59    0.16
  -5  -3   4    0.41    0.11
  -5   3  -4    0.32    0.11
  -5   3  -4    0.40    0.11
   5   4  -4   28.11    1.22
   5   4  -4   31.94    1.18
  -5   4   4   29.45    1.12
   5   4   4   28.96    1.19
  -5   4  -4   28.32    1.13
  -5  -4   4   31.16    1.24
  -5   4  -4   30.47    1.17
   5   4   4   31.14    1.24
  -5   4  -4   31.04    1.04
  -5   4  -4   29.80    1.11
   5   5  -4    8.97    0.53
   5   5  -4    9.61    0.56
  -5   5   4    9.01    0.50
   5   5  -4    8.67    0.57
  -5   5  -4    8.06    0.52
   5   5   4    9.87    0.58
  -5   5  -4    8.59    0.48
   5   6  -4   16.23    0.89
   5   6  -4   15.40    0.82
   5   6  -4   16.43    0.82
  -5   6   4   16.00    0.76
   5   6   4   17.48    0.87
  -5   6  -4   15.26    0.74
  -5   6  -4   15.70    0.83
   5   7  -4    8.98    0.70
   5   7  -4    8.59    0.62
   5   7  -4    9.45    0.64
  -5   7   4    9.64    0.58
  -5   7  -4    9.65    0.67
  -5   7  -4    9.08    0.56
   5   7   4    9.25    0.65
   5   8  -4   13.76    0.96
   5   8  -4   15.22    0.89
  -5   8   4   15.22    0.80
  -5   8  -4   15.82    0.80
  -5   8  -4   15.27    0.92
   5   8   4   14.90    0.92
  -5   0  -5    0.22    0.10
   5   0   5    0.11    0.09
  -5   0   5    0.08    0.09
   5   0   5    0.16    0.05
   5   0   5    0.30    0.12
   5   0  -5    0.06    0.07
  -5  -1  -5    5.17    0.38
   5   1  -5    5.84    0.29
  -5   1   5    5.00    0.35
  -5   1   5    5.07    0.25
   5   1  -5    4.89    0.35
   5  -1   5    5.55    0.39
   5   1   5    5.50    0.36
  -5   1  -5    5.24    0.37
   5  -1  -5    5.02    0.33
  -5  -1   5    5.34    0.34
  -5   1  -5    5.97    0.32
   5   1   5    5.53    0.35
  -5   2   5    3.06    0.31
   5   2  -5    3.35    0.29
  -5   2   5    3.23    0.23
   5  -2   5    3.47    0.33
  -5  -2  -5    3.08    0.33
   5   2   5    3.34    0.30
  -5   2  -5    3.92    0.26
  -5   2  -5    3.38    0.20
  -5  -2   5    3.09    0.22
  -5  -2   5    3.08    0.26
   5   2   5    2.59    0.27
  -5  -3  -5   21.07    1.12
  -5   3   5   24.18    1.07
   5   3  -5   23.02    1.03
   5   3  -5   25.13    0.99
   5   3   5   24.40    1.01
  -5   3  -5   23.53    0.96
   5   3   5   24.46    1.05
  -5   3  -5   24.71    0.90
  -5  -3   5   25.76    1.01
  -5   3  -5   25.55    0.84
  -5   4   5    0.48    0.15
   5   4  -5    0.65    0.17
  -5  -4  -5    0.63    0.20
   5   4  -5    0.58    0.18
   5   4   5    0.04    0.12
  -5   4  -5    0.63    0.16
  -5   4  -5    0.43    0.13
  -5  -4   5    0.56    0.16
  -5   4  -5    0.43    0.13
   5   4   5    0.69    0.19
   5   5  -5   25.72    1.16
  -5   5   5   23.95    1.02
   5   5  -5   24.55    1.05
   5   5  -5   24.75    1.09
  -5   5  -5   25.41    1.01
  -5   5  -5   25.10    1.08
   5   5   5   23.44    1.10
  -5   5  -5   25.20    1.02
   5   6  -5    9.64    0.60
  -5   6   5    9.79    0.58
   5   6  -5    9.68    0.63
   5   6  -5    8.87    0.65
  -5   6  -5    9.58    0.63
   5   6   5   10.92    0.68
  -5   6  -5    9.52    0.55
  -5   6  -5   10.53    0.60
   5   7  -5   18.49    0.99
   5   7  -5   19.31    1.08
  -5   7   5   18.52    0.90
  -5   7  -5   19.55    0.89
  -5   7  -5   19.31    0.97
  -5   7  -5   18.92    1.01
   5   7   5   17.34    1.00
  -5   0   6   -0.03    0.08
   5   0  -6    0.02    0.07
  -5   0  -6    0.04    0.10
   5   0   6   -0.04    0.09
  -5   1   6    2.00    0.25
   5   1  -6    1.95    0.24
   5  -1   6    2.29    0.29
  -5   1   6    1.77    0.13
   5   1  -6    1.81    0.18
  -5  -1  -6    1.77    0.25
   5   1   6    2.10    0.26
  -5   1  -6    1.73    0.20
   5  -1  -6    1.44    0.20
  -5  -1   6    1.63    0.21
  -5   1  -6    1.75    0.24
  -5   2   6    9.04    0.55
  -5   2   6    8.83    0.40
  -5  -2  -6    8.42    0.57
   5   2  -6    8.12    0.52
  -5   2  -6    8.90    0.54
   5  -2  -6    8.34    0.52
  -5  -2   6    8.93    0.44
  -5  -2   6    8.02    0.47
   5   2   6    9.31    0.53
  -5   2  -6    8.96    0.47
   5   2   6    8.72    0.54
  -5   2  -6    8.36    0.34
   5   3  -6    7.52    0.50
  -5   3   6    6.66    0.50
  -5   3   6    6.96    0.40
  -5  -3  -6    7.55    0.56
  -5  -3   6    5.99    0.41
   5   3   6    7.00    0.49
  -5   3  -6    8.17    0.45
   5   3   6    7.69    0.49
  -5   3  -6    7.48    0.35
  -5  -4  -6    8.59    0.65
   5   4  -6    9.00    0.59
   5   4  -6   10.30    0.56
  -5   4   6   10.10    0.54
   5   4   6   10.28    0.61
  -5   4  -6    8.65    0.51
  -5   4  -6    8.75    0.54
   5   4   6    9.31    0.61
  -5   4  -6    9.93    0.47
   5   5  -6    3.05    0.34
  -5  -5  -6    2.73    0.41
  -5   5   6    3.10    0.32
   5   5  -6    2.62    0.36
  -5   5  -6    3.05    0.35
  -5   5  -6    3.11    0.31
  -5   5  -6    3.09    0.29
   5   5   6    1.96    0.32
   5   5   6    3.37    0.40
   5   6  -6   18.55    1.03
  -5   6   6   18.89    0.90
   5   6  -6   17.51    0.95
   5   6   6   18.04    0.97
  -5   6  -6   19.13    0.96
  -5   6  -6   19.36    0.88
   5   7  -6    3.50    0.42
  -5   7   6    2.49    0.35
   5   7  -6    3.18    0.49
  -5   7  -6    2.81    0.43
   5   7   6    2.67    0.42
  -5   7  -6    3.19    0.36
   5   0   7    0.13    0.14
  -5   0  -7    0.10    0.13
  -5   0   7    0.21    0.13
   5   0  -7    0.06    0.10
   5  -1   7    4.68    0.40
  -5  -1  -7    4.62    0.41
  -5   1   7    4.32    0.37
   5   1  -7    4.42    0.29
   5   1  -7    4.17    0.36
  -5   1  -7    3.77    0.32
  -5   1  -7    3.83    0.37
   5  -1  -7    3.95    0.33
   5   1   7    4.28    0.38
  -5  -1   7    3.97    0.35
  -5  -2  -7    3.65    0.40
   5   2  -7    3.29    0.35
  -5   2   7    3.56    0.38
   5  -2  -7    3.27    0.34
   5   2   7    3.46    0.36
   5   2   7    3.30    0.36
  -5   2  -7    3.79    0.31
  -5  -2   7    3.18    0.32
  -5  -3  -7    2.60    0.38
   5   3  -7    2.95    0.36
  -5   3   7    3.38    0.39
  -5  -3   7    3.28    0.32
   5  -3  -7    2.63    0.35
   5   3   7    3.24    0.36
  -5   3  -7    3.54    0.33
   5   3   7    3.05    0.37
   5   4  -7    9.54    0.56
   5   4  -7    9.06    0.62
  -5  -4  -7    7.27    0.65
  -5   4   7    7.78    0.62
  -5   4   7    9.16    0.52
   5   4   7    8.58    0.63
  -5  -4   7    8.59    0.53
  -5   4  -7    8.87    0.56
   5   4   7    8.40    0.59
   5   5  -7   14.98    0.87
  -5   5   7   15.86    0.78
  -5  -5   7   13.23    0.74
  -5   5  -7   14.05    0.73
  -5   5  -7   15.11    0.80
   5   5   7   13.04    0.85
   5   5   7   14.68    0.85
  -5   6   7    0.80    0.26
   5   6  -7    0.79    0.30
   5   6  -7    1.00    0.29
  -5   6  -7    0.92    0.29
   5   6   7    0.86    0.29
  -5   6  -7    1.14    0.25
  -5   0   8    0.15    0.16
   5   0  -8    0.09    0.14
  -5   0  -8    0.07    0.13
   5   0   8    0.04    0.14
  -5   0  -8    0.04    0.16
  -5   1   8    4.36    0.41
   5  -1   8    3.88    0.41
  -5  -1  -8    4.23    0.44
   5   1  -8    4.25    0.41
  -5  -1   8    3.92    0.39
   5  -1  -8    3.79    0.36
  -5   1  -8    4.73    0.38
   5   1   8    4.27    0.43
  -5   1  -8    4.22    0.40
   5  -2   8    1.33    0.27
  -5   2   8    1.07    0.26
   5   2  -8    0.94    0.24
  -5  -2  -8    1.09    0.28
  -5  -2   8    1.43    0.25
   5  -2  -8    1.02    0.24
  -5   2  -8    1.07    0.21
   5   2   8    0.94    0.25
  -5   3   8    0.39    0.21
   5   3  -8    0.29    0.19
  -5  -3  -8    0.26    0.22
  -5  -3   8    0.34    0.18
   5   3   8    0.39    0.21
   5  -3  -8    0.26    0.20
  -5   3  -8    0.28    0.17
  -5   4   8   10.65    0.76
   5   4  -8   12.40    0.76
  -5  -4   8   11.14    0.67
   5   4   8    9.75    0.74
   5  -4  -8   11.62    0.80
   5   4   8   12.10    0.74
  -5   4  -8   10.86    0.66
   5   5  -8    0.91    0.32
  -5   5  -8    1.07    0.28
   5   5   8    0.44    0.28
   5   5   8    0.42    0.25
  -5   5  -8    1.14    0.25
  -5   0  -9    0.17    0.16
  -5   0  -9    0.30    0.20
   5   0   9    0.00    0.16
  -5   0   9   -0.01    0.15
   5   0  -9    0.04    0.15
   5  -1   9    1.51    0.31
  -5  -1  -9    1.29    0.31
   5   1  -9    1.13    0.28
  -5   1   9    1.46    0.29
  -5  -1   9    1.15    0.27
  -5   1  -9    1.72    0.27
  -5   1  -9    1.43    0.30
   5   1   9    1.67    0.32
  -5  -2  -9    2.10    0.38
   5   2  -9    1.54    0.30
   5  -2   9    1.84    0.34
  -5   2   9    1.89    0.36
   5   2   9    2.07    0.37
  -5  -2   9    1.97    0.31
  -5   2  -9    2.05    0.31
   5  -3   9    2.90    0.42
  -5   3   9    4.06    0.48
   5   3  -9    3.10    0.42
   5   3   9    3.04    0.45
  -5  -3   9    3.46    0.40
   5   4  -9    0.61    0.29
   5  -4   9    0.09    0.22
  -5   4   9    0.66    0.30
  -5  -4   9    0.24    0.21
   5   4   9    0.43    0.29
   5   0 -10   -0.04    0.20
   5   0  10    0.01    0.19
  -5   0  10   -0.06    0.18
   5  -1  10    0.44    0.23
   5   1 -10    0.49    0.25
  -5   1  10    0.35    0.23
   5   1  10    0.63    0.27
  -5  -1  10    0.68    0.26
   5   2 -10    1.78    0.36
   5  -2  10    1.51    0.36
  -5   2  10    1.50    0.35
  -5  -2  10    1.53    0.33
   5   2  10    1.41    0.36
  -5   3  10    2.88    0.45
   5  -3  10    2.57    0.45
   5   3 -10    1.45    0.36
  -5  -3  10    2.36    0.38
   5   3  10    2.45    0.44
  -6   0   0  115.76    3.70
  -6   0   0  117.51    4.12
   6   0   0  118.27    4.12
   6   0   0  121.02    3.70
  -6  -1   0  163.76    5.80
  -6  -1   0  169.75    5.16
   6   1   0  165.39    5.17
   6   1   0  174.81    5.45
   6   1   0  160.45    5.21
  -6   1   0  169.35    5.22
   6   2   0   12.18    0.47
  -6  -2   0   12.27    0.42
   6   2   0   11.80    0.49
  -6   2   0   11.84    0.41
   6   2   0   11.69    0.50
  -6   2   0   12.01    0.50
   6  -2   0   12.01    0.48
  -6   3   0  160.75    4.89
   6   3   0  160.65    4.96
   6   3   0  165.32    5.10
   6   3   0  157.58    5.12
   6   4   0    0.27    0.12
  -6   4   0    0.18    0.08
   6   4   0    0.20    0.13
   6   4   0    0.19    0.12
   6   5   0    3.13    0.33
   6   5   0    3.48    0.31
  -6   5   0    3.36    0.26
   6   5   0    3.96    0.36
   6   6   0    2.73    0.34
  -6   6   0    2.70    0.26
   6   6   0    2.06    0.29
   6   7   0    5.95    0.50
  -6   7   0    7.12    0.45
  -6   8   0    1.24    0.25
   6   8   0    1.59    0.33
   6   0   1  465.32   16.32
   6   0  -1  492.06   14.63
  -6   0   1  460.80   14.64
  -6   0  -1  497.90   14.62
  -6   0  -1  444.22   16.32
   6   0  -1  469.02   16.51
   6   0   1  487.99   14.33
  -6   0  -1  472.95   14.65
   6   0   1  474.73   14.65
   6   0   1  489.81   14.63
  -6  -1  -1   10.34    0.39
   6  -1   1   11.73    0.42
   6  -1   1    9.45    0.46
  -6  -1  -1   10.32    0.47
   6  -1   1   11.00    0.37
  -6  -1  -1    9.82    0.37
  -6   1   1   10.05    0.41
   6   1  -1   10.07    0.42
  -6  -1   1   11.47    0.43
   6   1   1   10.36    0.42
  -6   1  -1    9.91    0.41
   6   1   1   10.53    0.39
   6   1   1   10.85    0.40
   6   1   1   10.19    0.39
  -6  -1   1   10.86    0.36
   6   2  -1  195.15    6.26
   6  -2   1  209.26    6.19
  -6   2   1  205.18    6.03
   6   2  -1  189.89    6.23
  -6   2  -1  201.78    6.20
   6   2   1  195.64    6.07
  -6   2  -1  199.90    6.02
  -6   2  -1  199.64    6.26
   6   2   1  201.47    6.28
   6   2   1  195.94    6.22
   6   2   1  208.21    6.34
   6   3  -1    9.79    0.46
   6   3  -1    9.93    0.47
   6   3  -1    9.33    0.44
  -6   3   1    9.01    0.38
  -6   3  -1    9.90    0.38
   6   3   1    8.74    0.46
   6   3   1    9.18    0.44
   6   3   1    8.46    0.44
  -6   4   1   70.56    2.24
   6   4  -1   69.71    2.40
   6   4  -1   70.51    2.41
   6   4  -1   69.87    2.33
   6   4   1   69.85    2.43
   6   4   1   70.42    2.41
  -6   4  -1   69.48    2.24
   6   4   1   69.97    2.33
   6   5  -1    5.45    0.40
  -6   5   1    5.38    0.33
   6   5  -1    4.61    0.39
   6   5  -1    5.19    0.38
  -6   5  -1    5.45    0.33
   6   5   1    5.02    0.38
   6   6  -1   10.85    0.67
  -6   6   1   10.04    0.53
   6   6  -1   10.79    0.62
   6   6  -1   11.37    0.66
   6   6   1   10.04    0.61
  -6   6  -1   10.30    0.53
  -6   7   1    3.09    0.31
   6   7  -1    3.01    0.37
   6   7  -1    3.08    0.42
   6   7   1    3.29    0.39
  -6   7  -1    3.31    0.31
  -6   8   1    1.56    0.26
   6   8  -1    1.18    0.30
   6   8   1    1.61    0.33
  -6   8  -1    1.13    0.25
  -6   0  -2   15.18    0.51
  -6   0  -2   13.74    0.63
  -6   0   2   14.60    0.53
   6   0   2   14.15    0.52
   6   0   2   14.82    0.54
   6   0  -2   15.92    0.54
  -6   0   2   15.09    0.56
  -6   1   2  194.61    6.12
  -6  -1  -2  192.90    5.79
  -6  -1  -2  191.11    5.92
   6  -1   2  190.72    6.70
   6  -1   2  201.28    5.92
   6   1  -2  180.20    5.98
   6  -1   2  207.57    5.98
  -6   1   2  186.33    5.97
  -6   1  -2  189.16    5.92
  -6   1  -2  187.00    5.97
  -6   1  -2  182.67    6.70
  -6   1  -2  193.59    5.77
   6   1   2  195.28    6.11
   6   1   2  189.99    5.82
  -6  -1   2  199.15    6.07
  -6   2   2   40.29    1.30
   6  -2   2   38.58    1.55
   6  -2   2   42.70    1.35
   6   2  -2   39.72    1.41
   6   2  -2   39.56    1.39
  -6   2  -2   40.31    1.37
   6   2   2   40.94    1.36
  -6   2  -2   39.66    1.34
  -6   2  -2   40.67    1.29
   6   2   2   41.90    1.40
  -6   3   2   77.47    2.46
   6   3  -2   77.29    2.59
   6   3  -2   74.45    2.60
  -6   3  -2   77.01    2.45
  -6   3  -2   78.72    2.55
   6   3   2   80.78    2.61
   6   3   2   81.84    2.55
  -6   4   2    4.49    0.29
   6   4  -2    5.06    0.34
   6   4  -2    5.06    0.35
   6   4  -2    4.63    0.35
  -6   4  -2    5.55    0.30
   6   4   2    4.41    0.33
  -6   4  -2    5.01    0.33
  -6   5   2   40.99    1.45
   6   5  -2   40.75    1.54
   6   5  -2   42.06    1.58
   6   5  -2   44.06    1.64
  -6   5  -2   41.96    1.57
  -6   5  -2   40.57    1.44
   6   5   2   40.70    1.55
   6   6  -2    0.49    0.18
   6   6  -2    0.66    0.22
   6   6  -2    0.18    0.17
  -6   6   2    0.35    0.14
  -6   6  -2    0.39    0.14
   6   6   2    0.21    0.16
   6   7  -2    0.20    0.21
   6   7  -2    0.35    0.19
  -6   7   2    1.24    0.22
   6   7   2    0.77    0.24
  -6   7  -2    0.79    0.19
  -6   8   2    0.22    0.19
   6   8  -2   -0.10    0.23
   6   8  -2    0.35    0.21
  -6   8  -2    0.25    0.19
   6   8   2   -0.01    0.20
   6   0   3  295.78    9.80
   6   0  -3  304.90    8.71
  -6   0  -3  264.30    9.77
   6   0   3  289.24    8.71
  -6   0   3  289.82    8.93
   6   0   3  282.78    8.50
   6   0  -3  261.68    9.72
  -6   0   3  266.77    8.71
   6   1  -3    9.24    0.47
   6  -1   3   11.00    0.53
  -6   1   3   10.22    0.41
   6   1  -3    9.83    0.40
  -6   1   3   10.96    0.48
  -6  -1  -3   10.21    0.53
   6  -1   3   11.34    0.42
  -6   1  -3    9.81    0.39
  -6   1  -3   11.16    0.42
  -6   1  -3    9.25    0.51
  -6  -1   3   10.81    0.43
   6   1   3   10.88    0.47
   6   1   3    9.86    0.44
  -6   1  -3    9.96    0.41
   6   2  -3   87.43    2.91
  -6  -2  -3   84.85    3.25
  -6   2   3   87.35    2.86
  -6   2   3   88.97    2.98
   6  -2   3   89.10    3.23
  -6   2  -3   89.01    2.84
   6   2   3   92.58    2.95
   6   2   3   90.18    2.83
  -6  -2   3   88.09    3.11
  -6   2  -3   88.71    2.82
   6   3  -3    9.21    0.52
  -6   3   3   10.28    0.46
   6  -3   3   11.02    0.58
   6   3  -3    9.90    0.50
  -6   3  -3   10.70    0.45
   6   3   3   10.78    0.52
   6   3   3   10.14    0.51
  -6   3  -3   11.10    0.49
  -6   3  -3   10.65    0.48
   6   4  -3   46.02    1.72
  -6   4   3   45.12    1.57
   6   4  -3   48.06    1.68
   6   4   3   46.54    1.69
  -6   4  -3   46.04    1.56
  -6   4  -3   47.65    1.65
   6   4   3   45.52    1.66
   6   5  -3    1.72    0.24
  -6   5   3    1.55    0.20
   6   5  -3    1.50    0.26
   6   5  -3    2.16    0.26
   6   5   3    1.70    0.25
  -6   5  -3    1.65    0.20
  -6   5  -3    1.54    0.23
   6   6  -3    7.34    0.53
  -6   6   3    7.35    0.44
   6   6  -3    6.78    0.55
   6   6  -3    7.87    0.53
   6   6   3    7.13    0.52
  -6   6  -3    8.63    0.55
  -6   6  -3    7.35    0.44
   6   7  -3    1.10    0.29
   6   7  -3    1.59    0.30
   6   7  -3    1.36    0.33
  -6   7   3    1.52    0.24
  -6   7  -3    1.24    0.22
   6   7   3    1.50    0.30
  -6   8   3    0.44    0.21
   6   8  -3    0.09    0.20
   6   8  -3    0.30    0.30
  -6   8  -3    0.27    0.26
  -6   8  -3    0.16    0.20
   6   8   3    0.73    0.28
   6   0   4   34.78    1.37
  -6   0  -4   32.22    1.34
  -6   0   4   33.75    1.22
   6   0   4   32.72    1.16
   6   0   4   33.43    1.10
   6   0  -4   31.93    1.23
  -6   1   4   89.35    2.75
   6  -1   4   90.44    3.18
  -6  -1  -4   82.05    3.17
  -6   1   4   88.80    2.91
   6   1  -4   83.83    2.85
   6   1  -4   88.27    2.72
  -6   1  -4   84.73    3.17
   6   1   4   84.04    2.89
   6   1   4   83.82    2.75
  -6  -1   4   86.23    2.85
  -6   1  -4   84.72    2.73
  -6   1  -4   86.74    2.74
   6  -2   4    3.42    0.30
  -6  -2  -4    2.92    0.29
  -6   2   4    3.93    0.24
  -6   2   4    3.75    0.29
   6   2  -4    3.05    0.27
  -6   2  -4    3.53    0.23
  -6   2  -4    3.58    0.21
  -6  -2   4    3.57    0.21
  -6   2  -4    3.67    0.16
   6   2   4    3.54    0.27
  -6  -2   4    2.88    0.22
   6   2   4    3.40    0.28
   6  -3   4   93.98    3.41
  -6  -3  -4   86.49    3.43
   6   3  -4   94.83    3.05
  -6   3   4   90.57    2.92
   6   3  -4   89.83    3.08
  -6   3  -4   93.01    2.87
   6   3   4   92.06    3.01
  -6   3  -4   88.03    2.90
   6   3   4   92.48    3.12
  -6   3  -4   91.09    2.97
  -6  -3   4   93.88    3.27
  -6   3  -4   93.33    2.99
   6   4  -4    2.61    0.31
   6   4  -4    3.27    0.30
  -6   4   4    3.36    0.27
   6   4   4    2.66    0.28
  -6   4  -4    3.47    0.26
  -6   4  -4    3.31    0.27
  -6  -4   4    2.94    0.27
   6   4   4    3.74    0.32
  -6   4  -4    3.18    0.28
   6   5  -4   17.59    0.86
   6   5  -4   19.48    0.87
  -6   5   4   17.99    0.78
   6   5  -4   18.37    0.92
  -6   5  -4   18.24    0.85
  -6   5  -4   18.66    0.83
  -6   5  -4   18.23    0.77
   6   5   4   17.87    0.87
   6   6  -4    0.28    0.19
   6   6  -4    0.27    0.16
   6   6  -4    0.16    0.19
  -6   6   4    0.15    0.13
  -6   6  -4    0.28    0.16
  -6   6  -4    0.28    0.16
  -6   6  -4    0.32    0.15
   6   6   4    0.46    0.19
   6   7  -4    1.48    0.30
   6   7  -4    1.43    0.34
   6   7  -4    2.13    0.36
  -6   7   4    1.27    0.25
  -6   7  -4    1.53    0.32
  -6   7  -4    1.98    0.28
  -6   7  -4    1.65    0.30
   6   7   4    1.54    0.33
  -6   0  -5  100.17    3.92
   6   0  -5  105.41    3.80
   6   0   5  113.82    3.37
   6   0   5  113.22    3.95
  -6   0   5  106.39    3.58
   6   0   5  105.25    3.60
  -6  -1  -5    3.55    0.31
  -6   1   5    3.58    0.29
   6   1  -5    3.55    0.21
  -6   1   5    3.59    0.20
   6   1  -5    3.41    0.16
   6  -1   5    4.57    0.36
   6   1  -5    3.26    0.28
   6   1   5    3.87    0.30
  -6   1  -5    3.26    0.30
   6   1   5    4.01    0.31
  -6   1  -5    3.67    0.24
   6  -1  -5    3.26    0.25
  -6  -1   5    2.93    0.25
  -6   2   5   74.37    2.57
   6  -2   5   77.26    2.78
   6   2  -5   69.61    2.50
  -6   2   5   73.90    2.37
  -6  -2  -5   73.75    2.81
  -6   2  -5   72.72    2.34
  -6   2  -5   70.40    2.39
   6   2   5   74.94    2.45
   6   2   5   71.12    2.55
  -6  -2   5   67.19    2.45
  -6  -2   5   73.54    2.59
   6   3  -5    0.47    0.15
  -6   3   5    0.36    0.13
  -6   3   5    0.48    0.17
  -6  -3  -5    0.52    0.18
   6   3  -5    0.30    0.14
  -6   3  -5    0.92    0.13
  -6   3  -5    0.45    0.08
  -6   3  -5    0.48    0.13
  -6  -3   5    0.64    0.13
  -6  -3   5    0.51    0.12
   6   3   5    0.59    0.17
   6   3   5    0.44    0.16
  -6   4   5   29.70    1.16
   6   4  -5   31.00    1.22
  -6  -4  -5   30.01    1.43
   6   4  -5   30.44    1.29
  -6   4  -5   30.72    1.15
  -6   4  -5   32.20    1.16
  -6   4  -5   30.08    1.19
   6   4   5   29.71    1.28
   6   4   5   31.63    1.27
   6   5  -5    8.97    0.60
   6   5  -5    9.37    0.55
  -6   5   5    7.94    0.49
   6   5  -5    7.44    0.53
   6   5   5    8.56    0.58
  -6   5  -5    8.67    0.48
  -6   5  -5    8.27    0.53
  -6   5  -5    8.27    0.49
   6   6  -5    6.06    0.48
  -6   6   5    5.28    0.41
   6   6  -5    6.16    0.50
   6   6  -5    5.85    0.53
  -6   6  -5    5.98    0.42
  -6   6  -5    5.97    0.45
  -6   6  -5    6.88    0.50
   6   6   5    6.40    0.53
   6   7  -5    0.35    0.20
   6   7  -5    0.57    0.27
  -6   7   5    0.34    0.20
  -6   7  -5    0.12    0.23
  -6   7  -5    0.07    0.23
   6   7   5    0.38    0.23
  -6   7  -5    0.82    0.22
  -6   0  -6   10.18    0.62
   6   0   6   10.93    0.60
   6   0  -6   10.96    0.53
  -6   0   6   10.97    0.58
   6   1  -6   66.10    2.32
   6   1  -6   64.67    2.27
  -6   1   6   60.75    2.29
  -6  -1  -6   63.44    2.51
  -6   1   6   62.42    2.04
  -6  -1   6   64.88    2.26
  -6   1  -6   67.80    2.17
   6   1   6   59.60    2.29
  -6   1  -6   65.89    2.50
   6  -1  -6   63.13    2.40
   6   1   6   64.67    2.21
  -6   2   6    9.77    0.43
  -6  -2  -6    8.51    0.60
   6   2  -6    9.35    0.56
  -6   2   6    9.03    0.56
  -6   2  -6    9.24    0.37
   6   2   6    9.23    0.57
   6   2   6    9.16    0.54
   6  -2  -6    8.72    0.54
  -6   2  -6    9.06    0.56
  -6  -2   6    8.82    0.50
  -6  -2   6    9.92    0.45
  -6   2  -6    9.97    0.49
  -6   3   6   15.80    0.64
   6   3  -6   13.47    0.73
  -6   3   6   13.31    0.75
  -6  -3  -6   13.35    0.81
   6   3   6   13.40    0.74
  -6   3  -6   13.44    0.65
  -6   3  -6   13.19    0.56
   6   3   6   13.87    0.72
  -6  -3   6   13.42    0.65
  -6  -4  -6    1.87    0.32
   6   4  -6    1.39    0.23
  -6   4   6    1.50    0.22
   6   4  -6    1.66    0.28
  -6   4  -6    1.58    0.22
  -6   4  -6    1.57    0.23
  -6   4  -6    1.76    0.20
   6   4   6    1.63    0.28
   6   4   6    1.50    0.26
  -6  -4   6    1.39    0.21
  -6  -5  -6   18.54    1.09
   6   5  -6   19.11    0.90
   6   5  -6   17.75    0.98
  -6   5   6   18.82    0.90
  -6   5  -6   21.27    0.85
   6   5   6   18.01    0.95
   6   5   6   18.27    0.98
  -6   5  -6   18.60    0.84
  -6   5  -6   20.38    0.93
  -6   6   6    0.13    0.21
   6   6  -6    0.02    0.18
   6   6  -6    0.11    0.17
  -6   6  -6    0.25    0.21
   6   6   6    0.22    0.21
  -6   6  -6    0.31    0.18
   6   7  -6    0.41    0.24
   6   7  -6    0.17    0.27
  -6   7   6    0.20    0.24
  -6   7  -6    0.09    0.24
  -6   7  -6    0.18    0.19
   6   7   6    0.08    0.22
   6   0  -7   49.49    1.88
   6   0   7   49.08    1.90
  -6   0   7   47.41    1.85
  -6   0  -7   50.88    2.05
   6   1  -7    0.52    0.12
  -6  -1  -7    0.50    0.18
  -6   1   7    0.31    0.16
   6  -1   7    0.78    0.21
   6   1  -7    0.37    0.16
  -6   1  -7    0.13    0.15
   6  -1  -7    0.50    0.15
   6   1   7    0.44    0.17
  -6  -1   7    0.34    0.16
  -6   1  -7    0.42    0.14
   6   2  -7   35.33    1.43
  -6   2   7   33.36    1.45
  -6  -2  -7   35.07    1.58
  -6   2  -7   36.52    1.53
  -6  -2   7   32.56    1.35
  -6   2  -7   35.38    1.32
   6   2   7   33.02    1.44
   6  -2  -7   34.46    1.49
   6   2   7   33.68    1.38
   6   3  -7    4.99    0.44
  -6   3   7    4.51    0.43
  -6  -3  -7    4.52    0.49
   6  -3  -7    5.33    0.46
   6   3   7    4.19    0.43
   6   3   7    4.78    0.42
  -6  -3   7    4.50    0.37
  -6   3  -7    5.14    0.38
  -6   4   7   20.75    0.87
  -6  -4  -7   20.46    1.15
   6   4  -7   20.59    0.93
   6   4  -7   18.35    0.98
  -6  -4   7   18.50    0.88
   6   4   7   18.47    1.01
  -6   4  -7   19.50    0.90
   6   4   7   18.64    0.97
   6   5  -7    1.52    0.33
  -6   5   7    1.00    0.26
  -6   5  -7    1.08    0.26
   6   5   7    1.31    0.30
  -6   5  -7    1.10    0.23
   6   5   7    0.88    0.27
   6   6  -7    4.79    0.55
   6   6  -7    5.72    0.54
   6   6   7    4.98    0.52
  -6   6  -7    5.61    0.52
  -6   6  -7    5.19    0.43
  -6   0  -8   20.50    1.03
   6   0  -8   17.55    0.92
   6   0   8   19.06    0.97
  -6   0   8   17.94    0.92
  -6   0  -8   19.59    0.87
   6   1  -8   27.13    1.23
   6  -1   8   26.66    1.26
  -6  -1  -8   27.90    1.35
  -6   1   8   27.34    1.24
  -6   1  -8   28.64    1.14
   6   1   8   27.31    1.26
  -6  -1   8   25.99    1.19
  -6   1  -8   28.85    1.32
  -6   2   8    0.29    0.19
   6  -2   8    0.27    0.19
  -6  -2  -8    0.21    0.19
   6   2  -8    0.30    0.18
  -6   2  -8    0.26    0.15
   6   2   8    0.10    0.16
   6  -2  -8    0.15    0.17
  -6  -2   8    0.18    0.15
  -6   3   8   11.77    0.76
   6   3  -8   11.35    0.72
  -6  -3  -8   10.72    0.79
   6  -3  -8   10.72    0.73
   6   3   8   10.66    0.69
  -6   3  -8   12.55    0.66
  -6  -3   8   10.59    0.64
   6   3   8   11.06    0.73
  -6   4   8    2.89    0.42
   6   4  -8    3.27    0.37
   6   4  -8    3.53    0.43
   6   4   8    2.74    0.42
  -6  -4   8    2.90    0.34
  -6   4  -8    3.66    0.38
   6   4   8    3.76    0.45
   6  -4  -8    3.43    0.45
   6   5  -8    1.27    0.34
   6   5   8    1.68    0.35
  -6   5  -8    1.51    0.27
   6   5   8    0.98    0.33
   6   0  -9   16.05    0.90
  -6   0  -9   19.85    0.89
  -6   0  -9   17.63    0.99
   6   0   9   15.80    0.93
  -6   0   9   15.83    0.90
  -6   1   9    0.44    0.22
   6  -1   9    0.51    0.23
  -6  -1  -9    0.84    0.28
   6   1  -9    0.69    0.23
  -6  -1   9    0.60    0.23
  -6   1  -9    0.63    0.22
  -6   1  -9    0.43    0.23
   6   1   9    0.46    0.22
   6  -2   9   20.21    1.06
  -6  -2  -9   20.77    1.15
  -6   2   9   19.67    1.05
   6   2  -9   17.86    0.99
  -6  -2   9   17.96    0.96
   6   2   9   17.70    1.03
   6  -3   9    1.35    0.33
   6   3  -9    1.57    0.33
  -6   3   9    1.12    0.31
  -6  -3   9    0.83    0.25
   6   3   9    1.23    0.34
  -6   4   9    4.64    0.55
   6   4  -9    6.51    0.61
   6  -4   9    5.63    0.57
  -6  -4   9    5.32    0.49
   6   4   9    4.80    0.56
   6   0  10    0.11    0.21
   6   0 -10    0.33    0.24
  -6   0  10    0.34    0.21
   6   1 -10   12.64    0.82
   6  -1  10   13.31    0.88
  -6   1  10   13.09    0.84
  -6  -1  10   11.54    0.78
   6   1  10   12.98    0.87
   6  -2  10    0.90    0.31
  -6   2  10    0.35    0.25
   6   2 -10    0.92    0.30
  -6  -2  10    0.67    0.27
   6   2  10    0.81    0.30
   6   3 -10    3.71    0.50
   6  -3  10    3.92    0.52
  -6   3  10    4.34    0.54
   6   3  10    4.16    0.54
  -6  -3  10    3.43    0.45
   7   0   0    0.07    0.04
  -7   0   0    0.29    0.06
   7   0   0    0.09    0.05
  -7   0   0    0.03    0.04
   7   1   0   10.64    0.41
  -7  -1   0   10.39    0.45
  -7  -1   0   10.95    0.41
   7   1   0   10.26    0.42
   7   2   0   36.25    1.29
   7   2   0   36.68    1.31
  -7   2   0   37.43    1.30
   7  -2   0   38.89    1.28
   7   2   0   37.83    1.25
  -7  -2   0   39.40    1.23
   7   3   0    4.44    0.30
   7   3   0    4.23    0.27
   7   3   0    4.52    0.29
  -7   3   0    4.17    0.21
   7   4   0   92.17    3.10
   7   4   0   96.00    3.13
  -7   4   0   92.57    2.90
   7   4   0   91.03    3.01
  -7   5   0   -0.01    0.09
   7   5   0    0.40    0.16
   7   5   0    0.15    0.13
   7   5   0    0.00    0.13
   7   6   0   26.05    1.13
  -7   6   0   25.68    0.99
   7   6   0   25.17    1.18
  -7   7   0   -0.03    0.12
   7   7   0    0.07    0.16
  -7   8   0   32.80    1.26
   7   8   0   31.20    1.45
  -7   0  -1    0.04    0.04
   7   0   1    0.08    0.05
   7   0   1    0.04    0.03
  -7   0  -1    0.10    0.05
   7   0   1    0.13    0.03
   7   0  -1    0.04    0.03
  -7   0   1    0.05    0.04
   7   0   1    0.04    0.05
   7   0  -1    0.08    0.05
  -7  -1  -1    9.71    0.35
   7  -1   1    9.29    0.31
  -7   1   1    8.39    0.37
   7   1  -1    9.23    0.39
   7  -1   1    9.46    0.33
  -7  -1  -1    9.76    0.33
  -7  -1  -1    8.59    0.43
   7  -1   1    9.04    0.43
  -7   1  -1    9.14    0.38
   7   1   1    9.17    0.38
   7   1   1    8.96    0.35
  -7  -1   1    9.17    0.39
   7   1   1    8.67    0.35
  -7  -1   1    9.14    0.37
   7  -2   1    1.19    0.12
   7   2  -1    1.06    0.13
  -7   2   1    0.91    0.12
   7   2  -1    1.00    0.13
  -7   2  -1    1.45    0.08
   7   2   1    1.17    0.11
   7   2   1    1.03    0.14
  -7   2  -1    1.00    0.12
   7   2   1    1.40    0.13
   7   2   1    0.94    0.12
   7   3  -1   42.72    1.49
  -7   3   1   42.76    1.35
   7   3  -1   40.50    1.43
   7   3  -1   40.37    1.48
   7   3   1   41.52    1.47
   7   3   1   43.55    1.44
   7   3   1   41.87    1.50
  -7   3  -1   41.16    1.34
  -7   4   1    8.76    0.39
   7   4  -1    7.80    0.47
   7   4  -1    8.51    0.48
  -7   4  -1    7.93    0.37
   7   4   1    8.12    0.47
   7   4   1    8.64    0.46
   7   4   1    7.62    0.48
   7   5  -1   63.49    2.25
   7   5  -1   60.57    2.16
   7   5  -1   60.80    2.24
  -7   5   1   62.17    2.04
  -7   5  -1   62.75    2.04
   7   5   1   63.43    2.18
   7   6  -1    4.43    0.42
  -7   6   1    4.16    0.32
   7   6  -1    5.27    0.45
   7   6  -1    4.84    0.40
  -7   6  -1    4.62    0.32
   7   6   1    3.33    0.36
  -7   7   1   18.66    0.83
   7   7  -1   19.91    1.06
   7   7  -1   18.46    0.96
  -7   7  -1   19.11    0.83
   7   7   1   20.42    1.00
   7   8  -1    2.13    0.36
  -7   8   1    1.66    0.27
  -7   8  -1    1.22    0.25
   7   8   1    1.25    0.32
   7   0   2    0.14    0.05
  -7   0   2    0.04    0.04
   7   0  -2    0.03    0.04
   7   0   2    0.02    0.05
  -7   0  -2    0.06    0.05
  -7   0   2    0.02    0.04
   7   0   2    0.01    0.04
   7   1  -2   15.67    0.64
  -7   1   2   15.90    0.60
  -7  -1  -2   14.71    0.70
  -7  -1  -2   17.30    0.57
   7  -1   2   15.84    0.71
   7  -1   2   16.37    0.55
  -7  -1  -2   16.22    0.57
  -7  -1   2   16.91    0.58
   7   1   2   16.37    0.62
   7   1   2   15.92    0.62
  -7   1  -2   15.57    0.71
  -7   1  -2   16.35    0.54
  -7   1  -2   16.27    0.53
  -7   1  -2   16.15    0.60
   7   1   2   16.60    0.60
   7   2  -2   48.31    1.66
   7  -2   2   49.46    1.59
   7  -2   2   46.85    1.84
  -7   2   2   46.48    1.63
   7   2  -2   46.79    1.66
  -7  -2  -2   48.55    1.86
  -7   2  -2   49.06    1.58
   7   2   2   47.48    1.60
  -7   2  -2   49.96    1.52
  -7   2  -2   48.25    1.63
  -7   2  -2   51.86    1.53
   7   2   2   47.34    1.67
   7   2   2   50.68    1.66
   7   3  -2    5.16    0.33
  -7   3   2    5.57    0.27
   7   3  -2    6.12    0.36
   7   3   2    5.64    0.31
   7   3   2    5.67    0.34
  -7   3  -2    5.08    0.26
  -7   3  -2    5.18    0.32
  -7   3  -2    5.57    0.30
   7   4  -2   29.31    1.16
  -7   4   2   27.33    1.00
   7   4  -2   28.06    1.12
   7   4  -2   27.90    1.10
  -7   4  -2   29.05    1.09
  -7   4  -2   28.21    1.00
   7   4   2   29.73    1.12
   7   5  -2    0.65    0.19
   7   5  -2    0.55    0.16
   7   5  -2    0.39    0.15
  -7   5   2    0.37    0.12
  -7   5  -2    0.36    0.12
   7   5   2    0.16    0.14
   7   6  -2   55.65    2.15
   7   6  -2   54.28    2.04
   7   6  -2   58.13    2.12
  -7   6   2   55.98    1.91
   7   6   2   52.40    2.05
  -7   6  -2   58.45    1.92
   7   7  -2    2.64    0.36
   7   7  -2    2.73    0.38
  -7   7   2    2.13    0.26
   7   7  -2    3.12    0.42
  -7   7  -2    2.65    0.28
   7   7   2    2.75    0.37
   7   8  -2   18.79    1.11
  -7   8   2   19.17    0.85
   7   8  -2   17.58    0.99
  -7   8  -2   18.80    1.06
   7   8   2   18.71    1.03
  -7   8  -2   18.66    0.85
   7   0  -3    0.09    0.05
   7   0   3    0.11    0.06
  -7   0  -3    0.00    0.05
  -7   0   3    0.09    0.05
  -7   0  -3    0.14    0.08
   7   0  -3    0.00    0.03
  -7   0   3   -0.03    0.06
   7   0   3    0.05    0.07
  -7  -1  -3   24.50    1.09
  -7   1   3   27.12    1.00
   7  -1   3   27.81    1.11
  -7   1   3   27.19    0.93
  -7   1  -3   28.57    0.90
  -7   1  -3   24.75    0.85
  -7  -1   3   27.62    0.95
  -7   1  -3   26.35    0.92
  -7   1  -3   25.01    1.09
  -7   1  -3   26.73    0.89
   7   1   3   26.04    0.99
   7   1   3   27.11    0.95
  -7  -2  -3    4.69    0.35
  -7   2   3    4.94    0.28
   7   2  -3    4.97    0.32
   7  -2   3    4.86    0.34
  -7   2  -3    4.65    0.25
   7   2   3    5.53    0.32
  -7  -2   3    4.90    0.24
  -7  -2   3    5.13    0.25
   7   2   3    5.39    0.31
  -7   2  -3    5.81    0.27
  -7   2  -3    5.14    0.25
  -7   2  -3    4.17    0.26
  -7   3   3   42.75    1.46
   7   3  -3   43.40    1.60
   7  -3   3   45.05    1.77
   7   3  -3   44.78    1.58
   7   3   3   45.86    1.59
   7   3   3   45.36    1.56
  -7   3  -3   42.81    1.53
  -7   3  -3   43.64    1.45
  -7   3  -3   44.26    1.52
  -7   4   3    1.12    0.16
   7   4  -3    1.07    0.20
   7   4  -3    0.83    0.18
   7   4   3    1.11    0.20
   7   4   3    0.97    0.17
  -7   4  -3    1.16    0.15
  -7   4  -3    1.18    0.17
  -7   4  -3    1.47    0.20
   7   5  -3   40.22    1.59
  -7   5   3   40.62    1.41
   7   5  -3   41.43    1.55
   7   5  -3   36.95    1.49
  -7   5  -3   39.34    1.39
  -7   5  -3   37.72    1.49
   7   5   3   42.54    1.56
   7   6  -3    5.01    0.46
   7   6  -3    5.00    0.43
   7   6  -3    5.99    0.47
  -7   6   3    5.10    0.36
  -7   6  -3    5.63    0.37
   7   6   3    5.13    0.45
  -7   7   3   21.58    0.91
   7   7  -3   20.28    1.04
   7   7  -3   21.45    1.05
   7   7  -3   20.73    1.12
  -7   7  -3   21.17    0.90
  -7   7  -3   20.21    1.04
   7   7   3   20.87    1.06
   7   8  -3    1.18    0.30
   7   8  -3    0.83    0.33
  -7   8   3    1.11    0.25
  -7   8  -3    0.88    0.31
  -7   8  -3    0.86    0.23
   7   8   3    0.74    0.30
   7   0   4   -0.06    0.07
   7   0  -4   -0.01    0.04
  -7   0   4    0.12    0.07
   7   0   4    0.03    0.06
   7   0  -4    0.04    0.05
  -7   0  -4    0.07    0.08
  -7  -1  -4    3.81    0.31
   7  -1   4    4.26    0.33
  -7   1   4    4.30    0.30
   7   1  -4    4.06    0.21
   7   1  -4    4.18    0.30
  -7   1   4    3.99    0.22
  -7   1  -4    3.81    0.31
  -7   1  -4    3.95    0.22
   7   1   4    3.91    0.27
  -7   1  -4    3.86    0.22
   7   1   4    4.18    0.30
  -7  -1   4    4.24    0.26
  -7  -2  -4   17.17    0.83
  -7   2   4   15.51    0.64
   7   2  -4   17.03    0.74
  -7   2   4   16.52    0.74
   7  -2   4   15.43    0.78
  -7  -2   4   14.85    0.63
   7   2   4   15.23    0.70
  -7   2  -4   17.06    0.63
  -7   2  -4   17.33    0.63
  -7  -2   4   15.93    0.63
   7   2   4   15.22    0.69
   7   3  -4    1.16    0.20
   7   3  -4    0.99    0.18
  -7   3   4    0.91    0.16
  -7  -3  -4    1.05    0.21
  -7   3  -4    0.71    0.13
  -7   3  -4    0.77    0.13
   7   3   4    0.99    0.18
  -7   3  -4    0.99    0.15
   7   3   4    0.80    0.17
  -7  -3   4    0.97    0.14
   7   4  -4   59.80    2.13
   7   4  -4   59.05    2.18
  -7   4   4   56.90    2.00
  -7   4  -4   60.35    2.00
  -7   4  -4   61.12    2.09
  -7   4  -4   59.58    2.08
  -7  -4   4   64.23    2.27
   7   4   4   61.56    2.18
   7   4   4   61.76    2.13
   7   5  -4    0.28    0.16
  -7   5   4    0.01    0.10
   7   5  -4    0.16    0.13
   7   5  -4    0.45    0.18
  -7   5  -4    0.04    0.12
   7   5   4    0.18    0.15
  -7   5  -4    0.18    0.12
  -7   5  -4    0.09    0.12
  -7   6   4   16.95    0.78
   7   6  -4   17.88    0.90
   7   6  -4   18.24    0.89
   7   6  -4   16.48    0.93
  -7   6  -4   18.54    0.87
   7   6   4   17.59    0.91
  -7   6  -4   17.10    0.76
  -7   6  -4   17.35    0.87
   7   7  -4    0.22    0.19
  -7   7   4    0.01    0.15
   7   7  -4    0.20    0.24
   7   7  -4    0.16    0.24
   7   7   4    0.50    0.24
  -7   7  -4    0.31    0.20
  -7   7  -4    0.36    0.18
   7   0   5    0.00    0.07
   7   0  -5    0.06    0.06
  -7   0   5    0.01    0.09
   7   0   5    0.08    0.10
  -7   0  -5    0.19    0.11
  -7   1   5    4.14    0.23
   7  -1   5    5.05    0.39
  -7  -1  -5    3.90    0.34
  -7   1   5    4.20    0.32
   7   1  -5    4.55    0.21
   7   1  -5    4.44    0.33
  -7   1  -5    4.75    0.27
  -7   1  -5    4.10    0.35
   7  -1  -5    4.23    0.29
  -7  -1   5    4.79    0.31
   7   1   5    4.34    0.33
   7   1   5    4.42    0.32
   7   2  -5    4.70    0.37
  -7   2   5    4.15    0.27
  -7  -2  -5    4.01    0.37
  -7   2   5    5.03    0.38
   7  -2   5    4.95    0.40
  -7  -2   5    4.40    0.23
  -7   2  -5    4.93    0.29
  -7   2  -5    4.68    0.37
   7   2   5    4.20    0.34
  -7   2  -5    4.63    0.26
   7   2   5    4.41    0.35
  -7  -2   5    4.51    0.30
  -7   3   5   28.21    1.06
   7   3  -5   27.68    1.12
  -7   3   5   29.35    1.21
  -7  -3  -5   25.56    1.27
   7   3  -5   27.47    1.17
  -7  -3   5   26.22    1.05
  -7  -3   5   29.93    1.10
   7   3   5   28.23    1.16
   7   3   5   28.56    1.14
  -7   3  -5   27.95    1.05
  -7   3  -5   25.93    1.00
   7   4  -5    2.83    0.30
  -7   4   5    2.74    0.28
  -7  -4  -5    2.16    0.33
   7   4  -5    2.82    0.33
  -7   4  -5    2.64    0.27
  -7   4  -5    2.74    0.24
  -7   4  -5    2.78    0.25
   7   4   5    2.64    0.31
   7   4   5    2.51    0.31
   7   5  -5   19.29    0.98
  -7   5   5   19.48    0.84
   7   5  -5   20.39    0.92
  -7  -5  -5   17.01    1.03
   7   5   5   19.05    0.94
  -7   5  -5   19.21    0.85
   7   5   5   19.83    0.96
  -7   5  -5   19.40    0.89
  -7   5  -5   19.37    0.82
   7   6  -5    2.55    0.34
  -7   6   5    2.83    0.30
   7   6  -5    3.13    0.41
   7   6  -5    2.60    0.35
   7   6   5    2.15    0.35
  -7   6  -5    2.41    0.27
  -7   6  -5    2.71    0.32
  -7   6  -5    2.62    0.34
  -7   7   5   13.34    0.72
  -7   7   5   14.29    0.86
   7   7  -5   15.89    0.88
   7   7  -5   15.20    0.94
   7   7  -5   13.92    0.84
  -7   7  -5   15.26    0.73
  -7   7  -5   14.46    0.85
   7   7   5   13.64    0.86
  -7   7  -5   14.96    0.83
  -7   0   6    0.05    0.10
  -7   0  -6   -0.07    0.09
   7   0  -6    0.03    0.07
   7   0   6    0.03    0.10
   7   1  -6    3.61    0.33
   7   1  -6    3.69    0.23
  -7  -1  -6    3.84    0.36
  -7   1   6    3.21    0.33
  -7   1   6    3.67    0.21
  -7  -1   6    4.10    0.32
   7  -1  -6    3.70    0.29
   7   1   6    3.94    0.35
  -7   1  -6    3.74    0.27
   7   1   6    3.12    0.31
  -7   1  -6    3.15    0.32
   7   2  -6   33.57    1.38
  -7   2   6   34.55    1.41
  -7  -2  -6   36.44    1.56
  -7   2   6   34.89    1.21
  -7   2  -6   36.11    1.17
  -7   2  -6   36.12    1.27
   7   2   6   31.49    1.38
   7  -2  -6   34.25    1.44
  -7  -2   6   33.70    1.31
  -7   2  -6   33.60    1.49
   7   2   6   34.11    1.34
  -7   3   6    3.22    0.27
   7   3  -6    3.31    0.35
  -7   3   6    2.73    0.34
  -7  -3  -6    3.13    0.38
  -7  -3   6    3.18    0.28
  -7   3  -6    3.25    0.23
  -7   3  -6    3.74    0.29
   7   3   6    3.19    0.34
   7   3   6    3.36    0.35
  -7  -4  -6   14.03    0.89
  -7   4   6   16.06    0.73
   7   4  -6   14.94    0.82
   7   4  -6   15.02    0.75
   7   4   6   16.51    0.82
   7   4   6   15.66    0.83
  -7   4  -6   14.75    0.72
  -7   4  -6   14.37    0.68
  -7   4  -6   14.57    0.65
  -7  -4   6   14.32    0.69
   7   5  -6    0.40    0.21
   7   5  -6    0.50    0.20
  -7   5   6    0.27    0.18
  -7  -5   6    0.34    0.15
  -7   5  -6    0.36    0.18
  -7   5  -6    0.41    0.15
  -7   5  -6    0.30    0.15
   7   5   6    0.56    0.23
   7   5   6    0.69    0.23
   7   6  -6   32.39    1.41
   7   6  -6   30.30    1.46
  -7   6   6   30.13    1.36
   7   6  -6   35.06    1.40
  -7   6  -6   32.40    1.37
   7   6   6   29.32    1.40
  -7   6  -6   31.34    1.24
   7   7  -6    1.50    0.33
  -7   7   6    1.66    0.35
   7   7  -6    1.75    0.41
  -7   7  -6    1.38    0.26
  -7   7  -6    1.45    0.36
   7   7   6    1.47    0.34
  -7   0   7    0.28    0.15
  -7   0  -7    0.16    0.14
   7   0  -7    0.13    0.10
   7   0   7   -0.06    0.11
  -7   0  -7    0.04    0.10
  -7  -1  -7    7.17    0.53
   7  -1   7    6.79    0.50
  -7   1   7    7.16    0.50
   7   1  -7    5.69    0.45
   7   1   7    6.28    0.48
   7  -1  -7    6.64    0.43
  -7  -1   7    7.02    0.46
  -7   1  -7    7.41    0.42
  -7   1  -7    7.27    0.52
  -7  -2  -7    2.17    0.33
   7   2  -7    1.45    0.26
  -7   2   7    2.32    0.31
  -7   2  -7    2.13    0.30
  -7  -2   7    2.09    0.26
   7   2   7    2.06    0.29
  -7   2  -7    2.13    0.23
   7   2   7    1.81    0.29
   7  -2  -7    1.89    0.27
  -7   3   7    1.85    0.31
   7   3  -7    2.05    0.31
  -7  -3  -7    1.64    0.32
   7  -3  -7    1.61    0.28
   7   3   7    1.78    0.29
  -7  -3   7    1.74    0.24
   7   3   7    1.97    0.30
  -7   3  -7    1.63    0.23
   7   4  -7    0.91    0.24
   7   4  -7    1.11    0.27
  -7  -4  -7    1.10    0.31
  -7   4   7    0.81    0.20
   7   4   7    0.84    0.25
  -7   4  -7    1.03    0.20
  -7  -4   7    0.81    0.20
  -7   4  -7    0.76    0.20
   7   4   7    0.71    0.24
   7   5  -7    7.86    0.65
  -7   5   7   10.18    0.60
   7   5  -7   10.26    0.63
   7   5   7    9.39    0.67
  -7   5  -7    8.64    0.53
  -7   5  -7    9.23    0.60
   7   5   7    8.71    0.68
   7   6  -7    0.90    0.29
   7   6  -7    0.71    0.32
   7   6   7    1.15    0.32
  -7   6  -7    1.18    0.24
   7   0   8    0.12    0.15
   7   0  -8   -0.21    0.12
  -7   0   8   -0.01    0.12
  -7   0  -8   -0.02    0.11
  -7   0  -8    0.05    0.14
  -7   1   8    1.62    0.29
   7  -1   8    1.62    0.29
  -7  -1  -8    1.43    0.29
   7   1  -8    1.65    0.29
  -7  -1   8    1.73    0.27
  -7   1  -8    1.69    0.29
  -7   1  -8    1.90    0.24
   7   1   8    1.51    0.29
   7   2  -8    8.11    0.58
  -7   2   8    6.62    0.54
   7  -2   8    7.22    0.56
  -7  -2  -8    8.63    0.66
  -7   2  -8    8.80    0.51
  -7  -2   8    7.44    0.51
   7   2   8    7.47    0.57
  -7  -3  -8    0.71    0.29
   7   3  -8    0.57    0.22
  -7   3   8    0.97    0.28
   7   3   8    0.68    0.23
   7   3   8    0.55    0.23
  -7   3  -8    0.55    0.19
   7  -3  -8    0.66    0.24
  -7  -3   8    1.20    0.23
   7   4  -8   19.88    0.92
   7   4  -8   17.74    0.99
   7   4   8   16.60    0.94
  -7  -4   8   15.78    0.84
   7  -4  -8   17.17    1.03
  -7   4  -8   17.27    0.83
   7   4   8   15.91    0.97
   7   5  -8   -0.02    0.20
   7   5   8    0.05    0.22
  -7   5  -8    0.17    0.18
   7   5   8   -0.09    0.23
  -7   0  -9    0.12    0.20
   7   0   9   -0.06    0.16
  -7   0  -9    0.15    0.16
   7   0  -9    0.00    0.15
  -7   0   9    0.00    0.16
  -7   1   9    2.06    0.33
  -7  -1  -9    1.97    0.36
   7  -1   9    1.96    0.35
   7   1  -9    1.92    0.33
  -7   1  -9    1.85    0.34
  -7  -1   9    1.85    0.30
   7   1   9    1.81    0.35
   7   2  -9    0.19    0.18
  -7   2   9    0.20    0.21
   7  -2   9    0.21    0.21
  -7  -2   9    0.45    0.21
   7   2   9    0.42    0.23
  -7   3   9    2.00    0.38
   7   3  -9    2.18    0.38
   7  -3   9    2.60    0.42
   7   3   9    1.94    0.37
  -7  -3   9    1.51    0.29
   7   4  -9    2.13    0.40
   7   4   9    2.73    0.46
   7   0  10   -0.19    0.20
   7   0 -10    0.20    0.22
  -7   0  10    0.22    0.19
  -7   1  10    1.30    0.33
   7   1 -10    1.59    0.33
   7  -1  10    1.49    0.35
   7   1  10    1.68    0.38
  -7  -1  10    1.28    0.32
   7   2 -10    3.49    0.47
   7  -2  10    4.80    0.54
  -7   2  10    3.87    0.50
  -7  -2  10    3.57    0.44
   7   2  10    3.84    0.51
  -8   0   0   12.73    0.50
  -8   0   0   12.84    0.54
   8   0   0   13.56    0.54
   8   0   0   13.04    0.46
  -8  -1   0  110.24    3.88
   8   1   0  110.02    3.46
   8  -1   0  105.73    3.88
   8   1   0  109.73    3.50
  -8  -1   0  117.07    3.46
   8   2   0   55.37    1.78
   8   2   0   56.30    1.87
   8   2   0   55.58    1.84
  -8   2   0   55.47    1.86
   8   3   0  146.32    4.81
   8   3   0  154.68    4.65
   8   3   0  144.54    4.77
  -8   3   0  154.61    4.54
   8   4   0    1.18    0.20
   8   4   0    1.20    0.19
  -8   4   0    1.22    0.13
   8   4   0    0.91    0.17
   8   5   0    0.01    0.14
   8   5   0    0.11    0.13
  -8   5   0    0.22    0.10
   8   5   0    0.12    0.13
   8   6   0    1.13    0.26
  -8   6   0    0.72    0.15
   8   6   0    0.78    0.23
   8   6   0    0.61    0.20
  -8   7   0    2.82    0.27
   8   7   0    2.59    0.35
  -8   8   0    0.21    0.17
   8   8   0    0.28    0.21
   8   0   1  341.49   11.36
   8   0   1  357.91   10.75
  -8   0  -1  348.12   12.19
  -8   0   1  351.66   10.94
   8   0   1  355.27   12.19
   8   0   1  358.54   10.91
   8   0  -1  363.50   12.20
  -8  -1  -1   41.13    1.32
  -8  -1  -1   41.47    1.54
   8   1  -1   44.70    1.33
   8  -1   1   41.46    1.26
  -8   1   1   39.53    1.37
   8  -1   1   40.68    1.54
   8   1  -1   40.65    1.37
   8  -1   1   42.96    1.30
  -8  -1   1   40.63    1.36
   8   1   1   40.86    1.30
   8   1   1   40.03    1.32
  -8  -1   1   39.59    1.46
   8   1   1   39.86    1.53
  -8   1  -1   40.55    1.37
   8   1   1   38.41    1.36
  -8   2   1  175.77    5.55
   8   2  -1  169.78    5.52
   8  -2   1  186.73    5.47
   8   2  -1  172.51    5.56
  -8   2  -1  175.19    5.55
   8   2   1  178.06    5.38
   8   2   1  182.81    5.59
   8   2   1  171.85    5.50
   8   2   1  174.79    5.57
   8   3  -1   16.15    0.71
   8   3  -1   16.32    0.71
  -8   3   1   16.83    0.58
   8   3  -1   16.90    0.68
  -8   3   1   16.99    0.71
  -8   3  -1   16.30    0.69
   8   3   1   16.54    0.68
   8   3   1   17.00    0.73
  -8   3  -1   16.73    0.57
   8   3   1   16.64    0.70
   8   4  -1   61.68    2.18
   8   4  -1   61.85    2.18
   8   4  -1   61.53    2.10
  -8   4   1   63.56    1.98
   8   4   1   63.07    2.11
  -8   4  -1   61.13    1.97
   8   4   1   61.32    2.20
   8   4   1   63.02    2.17
   8   5  -1   14.63    0.74
   8   5  -1   13.27    0.72
   8   5  -1   14.45    0.70
  -8   5   1   14.65    0.59
  -8   5  -1   13.86    0.58
   8   5   1   15.01    0.78
   8   5   1   13.93    0.70
  -8   6   1    5.55    0.34
   8   6  -1    4.97    0.45
   8   6  -1    5.53    0.46
   8   6  -1    5.06    0.42
  -8   6  -1    5.37    0.34
   8   6   1    5.10    0.43
  -8   7   1    0.67    0.17
   8   7  -1    0.45    0.23
   8   7  -1    1.10    0.27
  -8   7  -1    0.66    0.17
   8   7   1    0.26    0.18
  -8   8   1    0.74    0.20
   8   8  -1    0.62    0.26
  -8   8  -1    1.01    0.32
  -8   8  -1    0.88    0.21
   8   8   1    1.42    0.33
   8   0   2   28.99    0.93
  -8   0   2   26.97    0.95
  -8   0  -2   27.18    0.89
   8   0   2   26.92    1.11
   8   0   2   26.81    0.90
  -8   0   2   28.41    0.96
   8  -1   2  250.61    7.31
  -8  -1  -2  234.92    7.28
   8  -1   2  227.07    8.25
  -8  -1  -2  223.31    8.25
   8  -1   2  243.81    7.13
  -8   1   2  235.98    7.38
  -8  -1  -2  240.45    7.12
   8   1  -2  228.25    7.36
  -8   1  -2  235.53    7.16
  -8   1  -2  232.26    8.26
   8   1   2  236.60    7.16
   8   1   2  240.75    8.26
  -8   1  -2  238.29    7.38
  -8   1  -2  242.28    7.19
  -8  -1   2  243.87    7.48
  -8   1  -2  241.24    7.32
   8   1   2  235.24    7.38
   8  -2   2   16.17    0.72
   8   2  -2   15.14    0.64
   8   2  -2   14.23    0.64
   8  -2   2   16.44    0.58
  -8   2   2   16.21    0.63
  -8   2  -2   14.98    0.52
   8   2   2   16.34    0.62
  -8   2  -2   14.82    0.57
   8   2   2   15.32    0.66
   8   2   2   15.86    0.62
  -8   2  -2   15.10    0.61
  -8  -2   2   16.46    0.55
   8  -3   2   75.75    2.76
   8   3  -2   73.44    2.48
  -8   3   2   73.00    2.47
  -8   3   2   73.18    2.30
   8   3  -2   73.03    2.48
  -8   3  -2   74.94    2.40
   8   3   2   72.02    2.40
  -8   3  -2   73.36    2.45
   8   3   2   75.34    2.52
   8   3   2   73.61    2.45
  -8   3  -2   73.05    2.29
   8   4  -2    2.20    0.26
  -8   4   2    2.64    0.20
   8   4  -2    2.10    0.24
   8   4  -2    2.41    0.26
  -8   4  -2    2.43    0.23
   8   4   2    2.00    0.24
  -8   4  -2    2.49    0.19
   8   5  -2   24.74    1.06
  -8   5   2   24.24    0.91
   8   5  -2   24.60    1.03
   8   5  -2   24.94    1.09
  -8   5  -2   24.91    0.91
   8   5   2   23.34    1.03
  -8   6   2    2.11    0.22
   8   6  -2    2.27    0.32
   8   6  -2    1.75    0.27
   8   6  -2    1.81    0.31
   8   6   2    1.64    0.28
  -8   6  -2    1.99    0.22
   8   7  -2    0.45    0.21
   8   7  -2    0.13    0.21
   8   7  -2    0.18    0.20
  -8   7   2    0.43    0.16
  -8   7  -2    0.45    0.21
  -8   7  -2    0.31    0.15
   8   7   2    0.28    0.21
   8   8  -2    0.81    0.29
   8   8  -2    0.75    0.32
  -8   8   2    0.73    0.20
  -8   8  -2    0.64    0.20
  -8   8  -2    0.55    0.28
   8   8   2    0.40    0.26
  -8   0  -3  169.79    4.96
   8   0   3  172.11    5.81
  -8   0  -3  151.26    5.78
  -8   0   3  159.18    5.12
   8   0   3  162.78    5.00
  -8   0   3  168.13    5.25
   8   1  -3   21.84    0.87
   8  -1   3   23.32    0.98
  -8   1   3   22.33    0.81
  -8  -1  -3   21.49    0.97
  -8   1   3   22.54    0.87
  -8   1  -3   23.66    0.76
   8   1   3   22.39    0.86
  -8   1  -3   22.92    0.75
   8   1   3   23.51    0.99
  -8   1  -3   22.04    0.81
   8   1   3   22.07    0.82
  -8   1  -3   22.47    0.97
  -8   1  -3   21.90    0.72
  -8  -1   3   21.64    0.81
  -8   2   3   75.95    2.50
   8  -2   3   79.33    2.45
  -8  -2  -3   75.15    2.86
   8   2  -3   75.17    2.56
   8  -2   3   75.90    2.84
   8   2   3   75.51    2.47
  -8  -2   3   75.30    2.49
  -8   2  -3   76.86    2.38
  -8   2  -3   76.68    2.49
  -8  -2   3   73.51    2.68
   8   2   3   75.80    2.57
  -8   2  -3   76.12    2.44
  -8   2  -3   83.85    2.39
  -8   3   3   14.75    0.66
  -8  -3  -3   15.62    0.78
   8   3  -3   14.10    0.69
   8  -3   3   15.58    0.76
   8   3  -3   14.76    0.68
  -8   3  -3   16.28    0.59
   8   3   3   15.64    0.67
  -8   3  -3   14.91    0.61
   8   3   3   14.48    0.67
  -8   3  -3   14.07    0.56
  -8   3  -3   15.30    0.64
  -8   4   3   23.77    0.85
   8   4  -3   22.11    0.96
   8   4  -3   22.48    0.99
  -8   4  -3   22.33    0.83
   8   4   3   23.30    0.94
  -8   4  -3   21.50    0.90
  -8   4  -3   22.41    0.92
   8   4   3   24.16    0.97
   8   5  -3   11.82    0.64
   8   5  -3   11.89    0.69
  -8   5   3   12.07    0.55
   8   5  -3   12.19    0.66
  -8   5  -3   11.63    0.53
   8   5   3   12.80    0.67
  -8   5  -3   11.10    0.61
  -8   5  -3   10.92    0.61
   8   6  -3    1.24    0.28
  -8   6   3    1.65    0.21
   8   6  -3    0.93    0.22
   8   6  -3    1.15    0.26
  -8   6  -3    1.43    0.20
  -8   6  -3    1.20    0.24
   8   6   3    0.96    0.25
   8   7  -3    0.97    0.29
   8   7  -3    1.56    0.30
   8   7  -3    1.22    0.31
  -8   7   3    1.16    0.21
  -8   7  -3    1.12    0.21
   8   7   3    0.76    0.26
  -8   7  -3    1.32    0.29
   8   8  -3    0.22    0.29
  -8   8   3    0.16    0.18
   8   8  -3    0.17    0.24
  -8   8   3    0.08    0.21
  -8   8  -3    0.50    0.27
  -8   8  -3    0.31    0.19
   8   8   3    0.08    0.24
   8   0  -4    5.14    0.25
  -8   0   4    4.93    0.30
   8   0   4    4.74    0.29
   8   0   4    4.95    0.37
  -8   0  -4    5.02    0.36
  -8   1   4  141.74    4.62
  -8   1   4  142.67    4.44
   8  -1   4  144.71    5.07
   8   1  -4  135.20    4.53
  -8  -1  -4  132.87    5.06
  -8  -1   4  148.47    4.57
   8   1   4  138.42    4.61
  -8   1  -4  139.16    5.06
  -8   1  -4  143.17    4.39
   8   1   4  144.42    4.40
  -8   1  -4  140.09    4.43
  -8  -2  -4   33.78    1.46
  -8   2   4   34.39    1.21
   8  -2   4   36.12    1.45
  -8   2   4   36.01    1.34
   8   2   4   35.02    1.31
  -8   2  -4   34.64    1.18
  -8   2  -4   31.81    1.19
  -8  -2   4   34.09    1.21
  -8  -2   4   33.66    1.23
   8   2   4   34.99    1.27
   8   3  -4  110.19    3.54
   8   3  -4  109.09    3.57
  -8  -3  -4  104.51    3.98
  -8   3   4  107.86    3.48
  -8  -3   4  102.97    3.47
  -8  -3   4  110.56    3.77
  -8   3  -4  104.32    3.33
  -8   3  -4  108.58    3.45
   8   3   4  103.00    3.45
   8   3   4  105.79    3.58
  -8   3  -4  107.38    3.43
   8   4  -4    3.96    0.33
  -8  -4  -4    3.89    0.38
  -8   4   4    3.51    0.30
   8   4  -4    3.38    0.35
   8   4   4    3.42    0.32
  -8   4  -4    4.01    0.30
   8   4   4    3.60    0.34
  -8   4  -4    4.23    0.27
  -8  -4   4    3.48    0.28
  -8   4  -4    3.85    0.30
   8   5  -4    4.20    0.42
   8   5  -4    3.37    0.35
   8   5  -4    4.01    0.36
  -8   5   4    4.51    0.32
  -8   5  -4    4.46    0.30
  -8   5  -4    4.49    0.35
   8   5   4    4.69    0.40
  -8   5  -4    4.32    0.35
  -8   6   4    0.86    0.19
   8   6  -4    1.03    0.25
   8   6  -4    1.17    0.28
   8   6  -4    1.33    0.27
  -8   6  -4    1.03    0.19
   8   6   4    0.79    0.25
  -8   6  -4    1.47    0.26
  -8   6  -4    0.85    0.22
   8   7  -4    6.17    0.60
   8   7  -4    6.28    0.54
  -8   7   4    6.04    0.53
   8   7  -4    6.66    0.56
  -8   7   4    6.49    0.44
  -8   7  -4    6.43    0.43
  -8   7  -4    6.28    0.52
   8   7   4    6.82    0.58
   8   0   5   68.14    2.31
   8   0  -5   67.12    2.49
  -8   0  -5   68.31    2.67
  -8   0   5   69.35    2.41
   8   0   5   77.27    2.72
   8  -1   5   12.12    0.69
   8   1  -5   11.96    0.62
  -8  -1  -5   12.02    0.68
   8   1  -5   13.51    0.48
  -8   1   5   12.49    0.62
  -8   1   5   12.10    0.50
  -8   1  -5   12.83    0.69
   8  -1  -5   12.31    0.58
  -8   1  -5   12.59    0.52
   8   1   5   12.00    0.59
  -8  -1   5   12.56    0.58
   8   1   5   12.20    0.62
  -8   2   5   67.43    2.17
  -8   2   5   66.63    2.35
  -8  -2  -5   62.75    2.56
   8   2   5   65.14    2.32
   8   2   5   66.82    2.23
  -8  -2   5   63.58    2.22
  -8   2  -5   66.32    2.15
  -8   2  -5   63.89    2.52
  -8   2  -5   64.52    2.13
  -8   3   5   19.93    0.80
   8   3  -5   18.80    0.89
   8   3  -5   17.92    0.84
  -8  -3  -5   16.21    0.96
  -8  -3   5   19.39    0.78
   8   3   5   19.90    0.89
   8   3   5   20.16    0.88
  -8   3  -5   19.16    0.78
  -8   3  -5   17.70    0.75
  -8  -3   5   20.49    0.78
   8   4  -5    9.77    0.56
  -8   4   5   10.31    0.53
   8   4  -5    7.95    0.56
  -8  -4  -5    8.18    0.62
  -8   4  -5   10.01    0.48
   8   4   5    8.89    0.57
  -8   4  -5    9.16    0.48
  -8  -4   5    9.33    0.46
  -8   4  -5    9.45    0.50
   8   4   5    8.65    0.56
   8   5  -5    2.27    0.33
  -8  -5  -5    1.76    0.32
   8   5  -5    1.69    0.28
  -8   5   5    1.26    0.25
  -8   5  -5    1.56    0.21
  -8   5  -5    1.73    0.25
   8   5   5    2.09    0.30
   8   5   5    1.31    0.27
  -8   5  -5    1.71    0.23
   8   6  -5    1.46    0.29
  -8   6   5    0.64    0.23
   8   6  -5    1.03    0.27
   8   6  -5    1.26    0.30
   8   6   5    1.34    0.30
  -8   6  -5    1.33    0.22
  -8   6  -5    1.78    0.27
  -8   6  -5    1.54    0.28
   8   7  -5    4.56    0.54
   8   7  -5    3.78    0.47
   8   7  -5    2.83    0.39
  -8   7   5    3.36    0.44
   8   7   5    3.44    0.45
  -8   7  -5    3.66    0.35
  -8   7  -5    3.87    0.42
  -8   0   6   20.87    0.94
   8   0  -6   22.43    0.89
  -8   0  -6   22.84    1.07
   8   0   6   21.20    0.98
  -8  -1  -6   57.22    2.29
   8   1  -6   54.02    2.05
  -8   1   6   57.73    2.09
  -8   1   6   55.63    1.84
  -8  -1   6   56.35    2.03
  -8   1  -6   58.70    2.28
  -8   1  -6   60.09    1.93
   8  -1  -6   54.57    2.13
   8   1   6   56.74    1.99
   8   2  -6    3.34    0.35
  -8   2   6    4.53    0.38
  -8  -2  -6    4.46    0.41
  -8   2   6    5.00    0.28
   8   2   6    4.34    0.36
   8  -2  -6    3.61    0.32
  -8   2  -6    3.79    0.28
  -8   2  -6    3.58    0.35
  -8  -2   6    4.07    0.31
   8   2   6    4.65    0.38
  -8   2  -6    3.97    0.23
  -8   3   6   12.08    0.72
  -8  -3  -6   12.67    0.79
   8   3  -6   12.15    0.71
  -8   3   6   13.52    0.60
  -8   3  -6   13.36    0.55
  -8   3  -6   12.09    0.59
   8   3   6   12.46    0.70
   8   3   6   13.66    0.71
  -8  -3   6   11.79    0.59
  -8   4   6   13.70    0.66
   8   4  -6   13.68    0.71
  -8  -4  -6   13.60    0.86
   8   4  -6   13.14    0.76
   8   4   6   12.55    0.75
   8   4   6   12.27    0.72
  -8   4  -6   12.57    0.62
  -8   4  -6   14.88    0.68
  -8  -4   6   12.09    0.62
  -8   4  -6   14.38    0.63
   8   5  -6   14.36    0.76
   8   5  -6   13.81    0.82
  -8   5   6   14.10    0.73
  -8   5  -6   13.63    0.67
  -8   5  -6   12.75    0.63
  -8   5  -6   14.22    0.73
   8   5   6   13.02    0.79
   8   5   6   12.94    0.78
   8   6  -6    3.56    0.42
   8   6  -6    3.47    0.47
   8   6  -6    3.14    0.41
  -8   6   6    2.87    0.37
  -8   6  -6    3.29    0.31
  -8   6  -6    2.85    0.37
   8   6   6    3.22    0.44
   8   7  -6    0.25    0.28
  -8   7   6    0.42    0.26
   8   7  -6    0.54    0.27
  -8   7  -6    0.18    0.20
   8   7   6    0.55    0.27
   8   0   7   49.26    1.96
  -8   0  -7   54.52    1.80
  -8   0   7   48.48    1.90
  -8   0  -7   50.13    2.11
   8   0  -7   51.22    1.91
  -8  -1  -7    8.87    0.61
   8   1  -7    9.01    0.57
   8  -1   7    8.56    0.57
  -8   1   7    8.59    0.55
  -8   1  -7    8.91    0.47
   8  -1  -7    8.05    0.48
  -8   1  -7    8.21    0.58
   8   1   7    7.66    0.54
  -8  -1   7    8.74    0.52
  -8  -2  -7   37.48    1.63
  -8   2   7   33.19    1.46
   8   2  -7   32.98    1.43
   8   2   7   34.72    1.40
  -8   2  -7   36.19    1.56
  -8  -2   7   32.47    1.35
   8  -2  -7   33.99    1.48
   8   2   7   31.97    1.45
  -8   2  -7   39.00    1.33
   8   3  -7    0.54    0.20
  -8  -3  -7    0.17    0.18
  -8   3   7    0.31    0.18
  -8   3  -7    0.29    0.14
  -8  -3   7    0.35    0.15
   8   3   7    0.54    0.21
   8   3   7    0.27    0.18
   8  -3  -7    0.09    0.16
  -8  -4  -7   15.45    1.00
   8   4  -7   16.58    0.92
   8   4  -7   16.96    0.85
   8   4   7   16.09    0.88
   8   4   7   15.79    0.90
  -8   4  -7   15.82    0.75
  -8  -4   7   15.99    0.77
  -8   4  -7   18.40    0.82
   8   5  -7    1.83    0.37
  -8   5   7    2.28    0.32
   8   5  -7    2.65    0.35
  -8   5  -7    2.62    0.29
   8   5   7    2.32    0.37
  -8   5  -7    1.84    0.30
   8   5   7    2.64    0.40
   8   6  -7    3.03    0.43
   8   6  -7    2.87    0.47
   8   6   7    3.18    0.44
  -8   6  -7    2.81    0.33
  -8   0  -8    1.51    0.22
   8   0  -8    1.65    0.29
  -8   0  -8    1.74    0.31
   8   0   8    1.44    0.29
  -8   0   8    1.05    0.24
   8   1  -8   13.16    0.79
  -8   1   8   13.95    0.80
   8  -1   8   13.30    0.81
  -8  -1  -8   15.92    0.91
  -8   1  -8   15.26    0.87
  -8   1  -8   16.73    0.73
   8   1   8   13.86    0.82
  -8  -1   8   14.36    0.77
  -8  -2  -8    2.60    0.40
   8  -2   8    1.73    0.31
   8   2  -8    1.77    0.31
  -8   2   8    2.84    0.37
  -8   2  -8    2.49    0.28
  -8  -2   8    2.41    0.30
   8   2   8    2.29    0.36
  -8   3   8   14.33    0.88
  -8  -3  -8   16.63    1.01
   8   3  -8   15.32    0.88
   8   3   8   15.20    0.89
   8   3   8   14.71    0.85
  -8  -3   8   15.19    0.78
   8   4  -8    4.99    0.53
   8   4  -8    6.12    0.50
  -8   4  -8    4.89    0.39
  -8  -4   8    4.92    0.42
   8   4   8    4.52    0.50
   8   4   8    5.49    0.56
   8   5  -8    2.03    0.40
   8   5   8    2.13    0.38
  -8   5  -8    2.02    0.29
   8   5   8    3.20    0.46
  -8   0  -9    9.12    0.68
   8   0  -9    8.23    0.61
   8   0   9    9.01    0.66
  -8   0   9    8.29    0.60
   8   1  -9    3.16    0.40
   8  -1   9    2.46    0.39
  -8   1   9    2.66    0.37
  -8  -1  -9    3.38    0.45
  -8  -1   9    3.71    0.40
  -8   1  -9    3.24    0.43
   8   1   9    2.55    0.40
   8  -2   9   18.22    1.02
  -8   2   9   17.05    0.98
   8   2  -9   17.29    0.98
   8   2   9   17.46    1.01
  -8  -2   9   18.00    0.92
   8   3  -9    0.46    0.25
  -8   3   9    0.67    0.27
   8  -3   9    0.44    0.24
   8   3   9    0.91    0.30
  -8  -3   9    0.31    0.21
   8   4  -9    3.98    0.52
  -8   4  -9    4.77    0.41
   8   4   9    5.11    0.58
   8   0  10    5.61    0.59
  -8   0  10    6.55    0.56
   8   0 -10    5.45    0.56
  -8   1  10   13.81    0.87
   8   1 -10   12.90    0.84
   8  -1  10   14.09    0.90
  -8  -1  10   12.92    0.81
  -8   2  10    0.32    0.24
   8  -2  10    0.19    0.25
   8   2 -10    0.23    0.23
  -8  -2  10    0.38    0.23
   8   2  10    0.72    0.28
   9   0   0    0.03    0.03
  -9   0   0    0.04    0.04
   9   0   0    0.06    0.04
  -9   0   0    0.07    0.05
   9  -1   0    4.74    0.27
   9   1   0    4.93    0.26
  -9  -1   0    5.19    0.27
   9   1   0    5.28    0.25
  -9  -1   0    5.31    0.24
   9   2   0   55.32    1.83
  -9   2   0   54.48    1.84
   9   2   0   54.84    1.86
   9   2   0   55.42    1.77
  -9   3   0   30.51    0.94
   9   3   0   29.50    1.07
   9   3   0   29.96    1.14
   9   3   0   29.21    1.11
   9   4   0  102.28    3.47
   9   4   0  102.74    3.50
   9   4   0  105.07    3.37
  -9   4   0  108.73    3.23
   9   5   0   31.38    1.31
   9   5   0   31.74    1.25
   9   5   0   30.91    1.30
  -9   5   0   32.49    1.09
   9   6   0   15.72    0.81
  -9   6   0   15.15    0.65
   9   6   0   16.64    0.88
   9   6   0   15.67    0.86
  -9   7   0    8.02    0.43
   9   7   0    7.31    0.56
  -9   8   0   21.69    1.17
   9   8   0   21.25    1.13
  -9   8   0   22.88    0.90
   9   0   1    0.00    0.04
   9   0   1    0.05    0.02
  -9   0  -1    0.04    0.05
  -9   0  -1    0.03    0.04
   9   0   1    0.02    0.02
  -9   0   1    0.04    0.05
   9   0   1    0.07    0.05
   9   0  -1    0.05    0.04
  -9  -1  -1   39.21    1.51
   9  -1   1   41.42    1.27
   9   1  -1   39.64    1.34
   9  -1   1   39.23    1.51
  -9   1   1   39.31    1.35
  -9  -1  -1   42.03    1.29
   9   1  -1   43.29    1.29
  -9   1  -1   41.01    1.36
   9   1   1   39.12    1.35
  -9   1  -1   39.00    1.51
   9   1   1   39.13    1.27
  -9  -1   1   37.24    1.43
   9   1   1   37.42    1.29
   9   1   1   40.82    1.52
   9  -2   1    2.87    0.18
  -9  -2  -1    2.79    0.23
   9  -2   1    2.66    0.22
  -9   2   1    2.50    0.20
   9   2  -1    2.70    0.21
   9   2  -1    2.38    0.20
   9   2   1    3.23    0.17
   9   2   1    2.81    0.19
   9   2   1    2.90    0.23
  -9   2  -1    2.74    0.20
   9   2   1    3.05    0.20
   9   3  -1   55.98    2.01
  -9   3   1   61.98    1.82
   9   3  -1   58.55    2.02
   9   3  -1   60.51    1.95
  -9   3   1   60.12    2.02
   9   3   1   59.69    1.95
  -9   3  -1   58.45    1.81
  -9   3  -1   55.68    1.99
  -9  -3   1   59.01    1.88
   9   3   1   57.60    1.99
  -9   4   1   21.40    0.74
   9   4  -1   20.24    0.90
   9   4  -1   21.21    0.91
   9   4  -1   20.74    0.87
  -9   4  -1   20.63    0.73
   9   4   1   21.75    0.88
   9   4   1   21.82    0.91
  -9   4  -1   21.06    0.89
   9   5  -1   14.33    0.72
   9   5  -1   13.72    0.72
   9   5  -1   14.49    0.69
  -9   5   1   13.27    0.55
   9   5   1   12.08    0.66
   9   5   1   12.17    0.69
  -9   5  -1   14.08    0.55
   9   5   1   12.25    0.71
   9   6  -1    4.73    0.46
  -9   6   1    4.59    0.31
   9   6  -1    5.30    0.47
   9   6  -1    4.71    0.40
  -9   6  -1    5.10    0.31
   9   6   1    4.54    0.41
  -9   7   1   12.47    0.58
   9   7  -1   11.83    0.73
   9   7  -1   12.71    0.80
   9   7  -1   11.59    0.79
  -9   7  -1   11.81    0.76
  -9   7  -1   12.79    0.58
   9   7   1   11.93    0.74
   9   8  -1    3.10    0.43
  -9   8   1    3.47    0.46
  -9   8   1    3.20    0.30
   9   8   1    3.24    0.45
  -9   8  -1    3.04    0.30
  -9   8  -1    3.23    0.45
   9   0   2    0.01    0.05
   9   0  -2    0.03    0.03
  -9   0  -2    0.07    0.06
  -9   0   2    0.01    0.04
   9   0   2   -0.03    0.04
   9   0   2    0.17    0.05
  -9   0  -2    0.06    0.02
   9  -1   2   20.55    0.71
  -9  -1  -2   21.98    0.72
   9   1  -2   20.72    0.81
   9  -1   2   21.34    0.69
  -9  -1  -2   21.83    0.71
   9  -1   2   21.59    0.91
  -9   1   2   20.61    0.78
   9  -1   2   22.35    0.69
  -9  -1  -2   19.73    0.90
  -9  -1   2   21.15    0.73
  -9   1  -2   20.67    0.91
   9   1   2   21.26    0.75
  -9   1  -2   21.70    0.79
   9   1   2   22.22    0.92
   9  -2   2   79.18    2.97
   9   2  -2   77.58    2.66
  -9   2   2   79.86    2.64
   9   2  -2   80.92    2.67
  -9  -2  -2   76.38    2.97
   9  -2   2   84.57    2.56
   9   2   2   79.92    2.67
  -9   2  -2   81.20    2.56
   9   2   2   80.08    2.57
  -9  -2   2   87.46    2.59
  -9   2  -2   77.24    2.63
  -9   2  -2   82.32    2.47
  -9   2  -2   82.61    2.46
   9   2   2   81.86    2.66
   9   3  -2   13.95    0.64
   9  -3   2   14.41    0.71
  -9   3   2   13.75    0.63
   9   3  -2   14.62    0.66
   9   3   2   14.85    0.60
  -9   3  -2   14.57    0.63
  -9   3  -2   14.56    0.59
   9   3   2   13.90    0.62
  -9   3  -2   14.57    0.51
   9   3   2   14.23    0.67
   9   4  -2   20.71    0.87
  -9   4   2   21.96    0.75
   9   4  -2   21.01    0.92
   9   4  -2   20.59    0.90
  -9   4  -2   18.80    0.85
   9   4   2   21.03    0.87
  -9   4  -2   20.26    0.73
   9   5  -2   24.65    1.04
   9   5  -2   24.67    1.10
   9   5  -2   25.69    1.08
  -9   5   2   24.28    0.89
  -9   5  -2   24.72    1.05
  -9   5  -2   23.99    0.89
   9   5   2   24.16    1.05
  -9   6   2   47.50    1.63
   9   6  -2   48.35    1.89
   9   6  -2   48.21    1.83
   9   6  -2   50.83    1.94
   9   6   2   47.80    1.84
  -9   6  -2   47.73    1.63
  -9   6  -2   46.56    1.85
   9   7  -2    9.01    0.66
  -9   7   2    8.25    0.46
   9   7  -2    8.34    0.65
   9   7  -2    9.14    0.62
  -9   7  -2    8.74    0.62
   9   7   2    9.04    0.64
  -9   7  -2    8.46    0.46
   9   8  -2    6.64    0.58
  -9   8   2    6.94    0.61
   9   8  -2    8.06    0.71
  -9   8  -2    7.16    0.62
   9   8   2    7.28    0.63
   9   0   3    0.06    0.07
   9   0   3    0.20    0.07
  -9   0   3    0.06    0.05
  -9   0   3    0.19    0.07
  -9   0  -3    0.08    0.05
  -9   0  -3    0.02    0.06
  -9  -1  -3    2.91    0.18
   9   1  -3    2.98    0.24
  -9   1   3    3.45    0.21
  -9  -1  -3    2.56    0.25
  -9   1   3    3.44    0.24
   9  -1   3    3.61    0.29
  -9   1  -3    2.68    0.25
   9   1   3    3.42    0.28
  -9   1  -3    2.95    0.20
   9   1   3    3.65    0.24
  -9  -1   3    3.21    0.20
   9   1   3    3.40    0.22
  -9   1  -3    3.06    0.15
   9  -2   3    3.76    0.30
  -9  -2  -3    3.22    0.29
  -9   2   3    3.28    0.23
   9   2  -3    2.81    0.25
   9  -2   3    3.65    0.21
  -9   2  -3    3.13    0.19
  -9   2  -3    3.03    0.17
   9   2   3    3.10    0.24
  -9  -2   3    3.18    0.16
   9   2   3    3.58    0.25
  -9   2  -3    2.42    0.20
  -9  -2   3    3.61    0.19
  -9  -3  -3   20.05    1.00
   9  -3   3   20.63    0.99
   9   3  -3   21.81    0.92
   9   3  -3   22.16    0.90
  -9   3   3   20.62    0.86
   9   3   3   21.25    0.88
  -9   3  -3   21.91    0.81
  -9  -3   3   20.43    0.76
  -9   3  -3   24.40    0.77
  -9   3  -3   21.63    0.75
   9   3   3   21.76    0.87
  -9   3  -3   21.22    0.84
   9   4  -3    9.56    0.54
  -9   4   3   10.12    0.44
   9   4  -3    9.06    0.55
  -9   4   3    9.25    0.52
  -9   4  -3    9.92    0.42
  -9   4  -3    9.07    0.50
  -9   4  -3    9.54    0.48
   9   4   3    9.43    0.53
   9   4   3    9.40    0.51
   9   5  -3   28.37    1.22
   9   5  -3   28.54    1.17
   9   5  -3   27.66    1.18
  -9   5   3   27.17    1.01
  -9   5  -3   27.53    1.12
   9   5   3   27.03    1.16
  -9   5  -3   26.79    1.13
  -9   5  -3   28.02    1.00
   9   6  -3    7.38    0.55
   9   6  -3    7.72    0.54
  -9   6   3    8.03    0.43
   9   6  -3    7.19    0.56
  -9   6  -3    7.11    0.51
   9   6   3    8.62    0.58
  -9   6  -3    7.44    0.41
   9   7  -3   21.34    1.09
  -9   7   3   21.47    1.12
  -9   7   3   23.44    0.92
   9   7  -3   22.10    1.13
  -9   7  -3   22.35    0.90
  -9   7  -3   23.14    1.11
   9   7   3   24.58    1.16
   9   8  -3    3.28    0.53
  -9   8   3    3.55    0.48
   9   8  -3    4.30    0.49
  -9   8  -3    4.19    0.48
   9   8   3    3.42    0.48
  -9   0   4    0.34    0.10
  -9   0  -4   -0.03    0.07
   9   0  -4    0.01    0.04
   9   0   4   -0.08    0.06
   9   0   4    0.02    0.09
  -9   1   4    0.79    0.15
  -9  -1  -4    0.80    0.17
   9   1  -4    0.86    0.16
  -9   1   4    0.62    0.11
   9  -1   4    0.75    0.17
   9   1   4    0.63    0.13
  -9   1  -4    0.64    0.15
  -9  -1   4    0.78    0.12
  -9   1  -4    0.86    0.11
   9   1   4    0.76    0.15
  -9   1  -4    1.05    0.13
  -9   1  -4    1.02    0.10
   9  -2   4    9.28    0.55
  -9   2   4    8.40    0.48
  -9  -2  -4    7.96    0.53
   9   2  -4    8.50    0.49
  -9   2   4    8.79    0.42
   9   2   4    9.26    0.48
  -9   2  -4    8.60    0.38
  -9   2  -4    7.96    0.40
   9   2   4    8.47    0.47
  -9   2  -4    8.85    0.40
  -9  -2   4    8.95    0.40
   9   3  -4   28.32    1.12
  -9  -3  -4   27.74    1.27
  -9   3   4   28.02    1.07
   9   3  -4   25.99    1.13
  -9   3  -4   29.11    1.05
  -9   3  -4   27.99    1.02
  -9   3  -4   26.90    0.96
  -9  -3   4   29.37    1.06
   9   3   4   27.31    1.10
   9   3   4   27.60    1.11
  -9  -3   4   26.41    1.00
  -9   4   4   40.99    1.53
   9   4  -4   40.80    1.56
   9   4  -4   40.24    1.60
  -9  -4  -4   38.87    1.76
   9   4   4   41.81    1.57
  -9   4  -4   40.54    1.48
  -9   4  -4   40.01    1.39
  -9  -4   4   43.12    1.58
   9   4   4   42.52    1.57
  -9   4  -4   40.93    1.49
   9   5  -4   10.24    0.61
   9   5  -4    9.87    0.64
  -9   5   4   10.35    0.59
  -9   5   4   10.17    0.50
   9   5  -4   10.03    0.61
  -9   5  -4   11.26    0.50
  -9   5  -4   10.42    0.57
   9   5   4    9.27    0.60
  -9   5  -4   10.45    0.57
   9   6  -4   10.38    0.66
   9   6  -4   11.73    0.70
  -9   6   4   11.11    0.55
   9   6  -4   10.42    0.71
  -9   6   4   10.88    0.67
  -9   6  -4   10.39    0.52
  -9   6  -4   11.09    0.64
  -9   6  -4   11.00    0.65
   9   6   4   11.52    0.71
   9   7  -4    3.63    0.45
   9   7  -4    2.35    0.37
  -9   7   4    3.12    0.30
  -9   7   4    2.44    0.37
   9   7  -4    2.67    0.42
  -9   7  -4    3.20    0.38
   9   7   4    2.60    0.40
  -9   7  -4    2.84    0.29
   9   0   5    0.03    0.09
   9   0  -5   -0.02    0.05
  -9   0   5    0.15    0.09
  -9   0  -5   -0.01    0.08
  -9   1   5    9.45    0.43
  -9  -1  -5   10.08    0.61
   9   1  -5   10.58    0.56
  -9   1   5   10.29    0.54
  -9  -1   5    9.48    0.49
   9   1   5   10.11    0.52
   9  -1  -5   10.19    0.49
   9   1   5   10.27    0.55
  -9   1  -5   10.17    0.43
  -9   1  -5    9.51    0.59
   9   2  -5    2.93    0.31
  -9  -2  -5    3.44    0.36
  -9   2   5    2.69    0.30
  -9   2   5    2.64    0.23
   9   2   5    2.88    0.29
  -9   2  -5    3.11    0.33
  -9  -2   5    3.15    0.25
   9   2   5    3.34    0.31
  -9   2  -5    3.40    0.23
  -9   2  -5    3.52    0.23
   9   3  -5   17.31    0.78
  -9   3   5   15.32    0.69
   9   3  -5   14.93    0.79
  -9  -3  -5   16.22    0.90
   9   3   5   15.45    0.76
  -9  -3   5   16.13    0.64
  -9   3  -5   16.54    0.65
   9   3   5   15.40    0.77
  -9  -3   5   15.22    0.66
  -9   3  -5   16.06    0.67
  -9   3  -5   16.70    0.68
  -9   4   5    9.64    0.52
   9   4  -5    8.10    0.57
  -9  -4  -5    7.83    0.60
   9   4  -5    9.04    0.55
  -9   4  -5    8.17    0.46
  -9   4  -5    8.07    0.43
   9   4   5    8.60    0.55
  -9   4  -5    8.01    0.46
  -9  -4   5    9.54    0.45
   9   4   5    9.09    0.56
   9   5  -5   24.93    1.05
  -9   5   5   20.52    0.98
   9   5  -5   22.27    1.09
  -9   5  -5   22.28    0.96
  -9   5  -5   22.52    0.97
   9   5   5   21.74    1.04
  -9   5  -5   22.35    0.88
   9   5   5   21.78    1.05
   9   6  -5    4.90    0.46
  -9   6   5    3.70    0.40
   9   6  -5    4.44    0.45
   9   6  -5    3.55    0.45
  -9   6  -5    3.64    0.31
   9   6   5    3.98    0.46
  -9   6  -5    4.27    0.41
  -9   6  -5    4.07    0.38
   9   7  -5   10.46    0.81
   9   7  -5    9.77    0.71
   9   7  -5   10.60    0.74
  -9   7   5   11.75    0.75
   9   7   5   10.62    0.76
  -9   7  -5   11.19    0.57
  -9   7  -5   11.53    0.70
   9   0   6    0.10    0.12
  -9   0  -6   -0.04    0.11
   9   0  -6    0.12    0.08
  -9   0   6    0.02    0.11
  -9   1   6    5.86    0.29
   9   1  -6    6.57    0.45
  -9   1   6    5.85    0.43
  -9  -1  -6    5.71    0.46
  -9   1  -6    6.50    0.35
   9   1   6    6.34    0.43
  -9   1  -6    5.84    0.46
   9   1   6    6.02    0.44
   9  -1  -6    5.78    0.37
  -9  -1   6    5.64    0.39
  -9   2   6    7.79    0.38
  -9  -2  -6    6.91    0.54
  -9   2   6    7.12    0.50
   9   2  -6    7.03    0.49
  -9  -2   6    7.19    0.42
   9   2   6    7.96    0.50
  -9   2  -6    8.08    0.40
  -9   2  -6    6.94    0.35
  -9   2  -6    7.14    0.52
   9   2   6    7.97    0.51
  -9  -3  -6    4.75    0.46
   9   3  -6    4.60    0.41
  -9   3   6    5.27    0.34
   9   3   6    5.46    0.43
  -9  -3   6    4.11    0.32
  -9   3  -6    5.06    0.33
   9   3   6    4.06    0.38
  -9   3  -6    4.95    0.30
  -9  -4  -6    7.16    0.61
   9   4  -6    6.89    0.49
   9   4  -6    7.28    0.55
  -9   4   6    7.41    0.46
  -9   4  -6    7.23    0.45
  -9   4  -6    6.86    0.40
  -9  -4   6    6.78    0.41
   9   4   6    6.90    0.53
  -9   4  -6    6.82    0.41
   9   4   6    8.14    0.55
   9   5  -6    7.07    0.58
   9   5  -6    8.07    0.56
  -9   5   6    7.43    0.51
  -9   5  -6    6.75    0.42
   9   5   6    7.67    0.58
  -9   5  -6    7.95    0.48
   9   5   6    6.41    0.54
  -9   5  -6    7.72    0.50
   9   6  -6   17.62    0.99
  -9   6   6   19.60    0.97
   9   6  -6   17.97    0.97
   9   6  -6   19.02    1.08
  -9   6  -6   19.53    0.95
   9   6   6   19.73    1.05
  -9   6  -6   18.74    0.82
  -9   0  -7    0.22    0.14
  -9   0  -7    0.15    0.11
   9   0   7   -0.04    0.12
  -9   0   7    0.06    0.14
  -9   1   7    7.00    0.50
  -9  -1  -7    7.42    0.56
   9   1  -7    6.74    0.50
   9   1   7    6.92    0.51
  -9  -1   7    7.48    0.48
  -9   1  -7    7.99    0.57
   9  -1  -7    7.09    0.44
  -9   1  -7    8.24    0.43
  -9   2   7    2.60    0.34
  -9  -2  -7    2.30    0.35
   9   2  -7    2.14    0.31
  -9   2  -7    2.68    0.26
  -9   2  -7    2.79    0.34
   9   2   7    2.53    0.32
   9   2   7    2.69    0.34
  -9  -2   7    2.11    0.26
   9  -2  -7    2.63    0.30
   9   3  -7   14.68    0.83
  -9   3   7   14.10    0.83
  -9  -3  -7   15.49    0.94
   9  -3  -7   15.02    0.83
   9   3   7   13.48    0.78
  -9   3  -7   16.53    0.71
  -9  -3   7   14.11    0.71
   9   3   7   14.45    0.83
   9   4  -7    2.24    0.32
   9   4  -7    1.71    0.32
   9   4   7    2.20    0.35
  -9   4  -7    1.64    0.25
  -9  -4   7    1.66    0.24
  -9   4  -7    1.95    0.24
   9   4   7    1.74    0.32
   9   5  -7    9.01    0.64
   9   5  -7    8.98    0.70
   9   5   7    9.11    0.68
  -9   5  -7    9.48    0.52
   9   5   7    8.78    0.65
   9   6  -7    4.01    0.54
   9   6  -7    3.52    0.45
   9   6   7    3.20    0.45
  -9   6  -7    4.08    0.36
  -9   0  -8   -0.11    0.16
  -9   0   8    0.12    0.15
   9   0  -8    0.06    0.13
  -9   0  -8    0.07    0.12
   9   0   8    0.11    0.16
  -9   1   8    0.30    0.17
   9   1  -8    0.41    0.18
  -9  -1  -8    0.55    0.22
   9  -1   8    0.32    0.21
  -9   1  -8    0.19    0.14
  -9   1  -8    0.13    0.18
  -9  -1   8    0.28    0.16
   9   1   8    0.29    0.19
   9   2  -8    0.40    0.20
  -9  -2  -8    0.13    0.19
  -9   2   8    0.44    0.21
   9   2   8    0.37    0.21
  -9   2  -8    0.31    0.18
  -9  -2   8    0.57    0.20
   9   3  -8    6.99    0.56
  -9   3   8    5.57    0.52
  -9  -3   8    5.78    0.45
   9   3   8    5.84    0.54
   9   3   8    6.70    0.55
   9   4  -8   14.70    0.92
   9   4  -8   16.58    0.88
  -9   4  -8   17.38    0.77
   9   4   8   14.40    0.92
   9   4   8   14.02    0.88
   9   5  -8    3.48    0.48
   9   5   8    2.69    0.43
   9   5   8    1.74    0.38
  -9   5  -8    3.02    0.32
  -9   0  -9    0.00    0.18
  -9   0   9   -0.18    0.16
   9   0   9    0.16    0.20
   9   0  -9    0.02    0.16
  -9  -1  -9    1.56    0.35
   9  -1   9    1.22    0.31
   9   1  -9    1.14    0.29
  -9   1   9    1.88    0.33
  -9   1  -9    1.51    0.34
   9   1   9    1.35    0.33
  -9  -1   9    0.78    0.24
   9   2  -9    0.77    0.26
  -9   2   9    0.54    0.24
   9  -2   9    0.38    0.24
  -9  -2   9    0.60    0.23
   9   2   9    0.71    0.27
   9   3  -9    8.35    0.67
   9  -3   9    9.54    0.71
  -9   3   9    8.34    0.69
   9   3   9    8.91    0.70
  -9  -3   9    8.71    0.60
   9   4  -9    1.78    0.39
   9   4   9    2.15    0.41
   9   4   9    2.86    0.43
  -9   4  -9    3.10    0.34
   9   0 -10   -0.06    0.19
  -9   0  10    0.31    0.22
   9   0  10    0.29    0.24
   9   1 -10    1.83    0.37
  -9   1  10    1.51    0.34
   9  -1  10    1.31    0.35
  -9  -1  10    2.09    0.35
   9   1  10    1.87    0.40
  -9   2  10    0.65    0.30
   9  -2  10    1.00    0.33
   9   2 -10    0.75    0.29
   9   2  10    0.25    0.27
  -9  -2  10    0.73    0.27
 -10   0   0   74.16    2.43
  10   0   0   75.89    2.68
 -10   0   0   75.38    2.67
  10   0   0   73.73    2.35
  10   1   0   40.55    1.35
  10   1   0   41.37    1.52
 -10  -1   0   39.88    1.51
  10   1   0   40.05    1.39
  10  -1   0   39.33    1.53
 -10  -1   0   43.96    1.36
  10   2   0  191.52    6.01
  10   2   0  193.20    5.79
 -10  -2   0  190.42    6.64
 -10   2   0  189.49    6.00
  10   2   0  187.80    5.94
  10   3   0   84.74    2.91
 -10   3   0   86.80    2.89
  10   3   0   87.31    2.88
  10   3   0   90.59    2.80
 -10   4   0   34.84    1.36
  10   4   0   36.46    1.40
 -10   4   0   37.70    1.16
  10   4   0   34.75    1.32
  10   4   0   36.20    1.38
  10   5   0    4.28    0.40
  10   5   0    3.44    0.33
  10   5   0    3.70    0.36
 -10   5   0    3.90    0.23
 -10   5   0    4.15    0.35
  10   6   0    6.91    0.55
 -10   6   0    7.62    0.38
  10   6   0    8.41    0.58
  10   6   0    8.04    0.54
 -10   6   0    6.93    0.52
 -10   7   0    2.51    0.24
 -10   7   0    2.41    0.36
  10   7   0    1.72    0.32
  10   8   0    4.92    0.52
 -10   8   0    4.68    0.52
 -10   0   1  222.35    7.06
  10   0   1  224.81    7.02
 -10   0  -1  223.44    7.87
  10   0   1  228.96    7.88
  10   0   1  223.81    7.05
 -10   0  -1  225.01    7.07
  10   0  -1  237.10    7.83
  10  -1   1  131.73    4.79
 -10  -1  -1  132.95    4.78
  10   1  -1  142.32    4.30
 -10  -1  -1  137.65    4.21
 -10   1   1  132.76    4.30
  10   1  -1  133.99    4.27
  10  -1   1  145.13    4.20
 -10   1  -1  134.18    4.30
  10   1   1  134.79    4.12
  10   1   1  136.45    4.29
  10   1   1  134.34    4.22
 -10   1  -1  134.59    4.80
  10   1   1  137.20    4.79
 -10  -1   1  132.72    4.72
  10   2  -1   40.81    1.44
  10  -2   1   42.96    1.35
  10  -2   1   38.53    1.57
 -10  -2  -1   39.59    1.57
 -10   2   1   41.86    1.42
  10   2  -1   39.56    1.41
  10   2   1   41.98    1.36
  10   2   1   42.15    1.36
  10   2   1   39.39    1.38
 -10   2  -1   39.72    1.41
 -10  -2   1   41.11    1.51
  10   3  -1   57.99    1.94
 -10   3   1   57.77    2.00
  10   3  -1   57.56    2.01
  10   3  -1   58.35    2.02
  10   3   1   58.31    1.94
  10   3   1   58.35    1.98
  10   3   1   58.76    2.04
 -10   3  -1   59.70    2.00
  10   4  -1   20.04    0.83
 -10   4   1   20.45    0.68
 -10   4   1   18.25    0.84
  10   4  -1   20.50    0.89
  10   4  -1   20.24    0.88
  10   4   1   19.06    0.83
 -10   4  -1   20.45    0.67
  10   4   1   18.32    0.85
 -10   4  -1   20.20    0.85
  10   4   1   18.93    0.89
  10   5  -1    8.51    0.55
  10   5  -1    9.51    0.57
 -10   5   1    7.55    0.36
  10   5  -1    8.56    0.51
 -10   5   1    6.80    0.49
 -10   5  -1    8.68    0.52
  10   5   1    7.35    0.49
 -10   5  -1    9.07    0.37
  10   5   1    7.46    0.53
  10   5   1    7.22    0.50
 -10   6   1    5.79    0.48
 -10   6   1    6.76    0.35
  10   6  -1    7.05    0.53
  10   6  -1    6.95    0.53
  10   6  -1    7.30    0.51
  10   6   1    5.47    0.46
 -10   6  -1    6.16    0.48
 -10   6  -1    7.15    0.36
 -10   7   1    3.04    0.26
  10   7  -1    2.18    0.35
  10   7  -1    2.84    0.42
 -10   7   1    2.76    0.38
  10   7  -1    2.66    0.40
  10   7   1    3.59    0.42
 -10   7  -1    2.57    0.25
 -10   7  -1    2.48    0.36
  10   8  -1    0.75    0.29
 -10   8   1    1.05    0.31
 -10   8  -1    0.95    0.30
  10   8   1    0.91    0.30
  10   0   2  127.70    4.51
  10   0  -2  127.43    4.39
 -10   0  -2  119.26    4.49
  10   0   2  129.74    3.96
 -10   0   2  123.35    4.00
  10   0   2  130.22    3.84
  10  -1   2   99.60    2.98
  10  -1   2   99.71    3.05
  10  -1   2   98.12    3.53
  10   1  -2   94.89    3.14
 -10  -1  -2   90.98    3.50
 -10  -1  -2   96.38    3.03
  10  -1   2  101.94    3.06
 -10   1   2   96.02    3.12
 -10   1  -2   96.23    3.13
  10   1   2   99.47    3.53
  10   1   2  101.29    3.13
 -10  -1   2   97.53    3.11
  10   1   2   98.03    3.01
 -10   1  -2   91.01    3.51
  10  -2   2   73.25    2.77
  10   2  -2   71.36    2.48
  10  -2   2   79.24    2.38
 -10  -2  -2   74.75    2.79
 -10   2   2   74.44    2.47
  10   2  -2   71.27    2.49
 -10   2  -2   73.07    2.46
  10   2   2   75.87    2.50
  10   2   2   77.62    2.40
 -10  -2   2   76.87    2.40
  10   2   2   75.81    2.47
 -10   3   2   17.77    0.75
  10   3  -2   16.69    0.76
 -10  -3  -2   16.78    0.84
  10   3  -2   16.15    0.75
  10  -3   2   18.35    0.85
 -10   3  -2   17.40    0.58
  10   3   2   17.95    0.79
  10   3   2   17.96    0.70
 -10  -3   2   18.37    0.60
  10   3   2   18.79    0.75
 -10   3  -2   18.30    0.74
 -10   3  -2   18.08    0.58
  10   4  -2   42.95    1.55
  10   4  -2   42.40    1.60
 -10   4   2   44.17    1.38
  10   4  -2   41.84    1.61
 -10   4   2   43.02    1.58
 -10   4  -2   42.30    1.37
  10   4   2   41.84    1.54
 -10   4  -2   42.53    1.56
  10   4   2   42.27    1.64
 -10   5   2   29.34    1.22
  10   5  -2   28.81    1.24
  10   5  -2   28.06    1.21
 -10   5   2   30.58    1.01
  10   5  -2   27.67    1.17
 -10   5  -2   29.49    1.00
  10   5   2   29.01    1.19
 -10   5  -2   27.10    1.17
 -10   6   2    6.95    0.37
  10   6  -2    6.75    0.53
  10   6  -2    6.72    0.50
  10   6  -2    6.40    0.52
 -10   6   2    6.24    0.50
 -10   6  -2    7.10    0.36
  10   6   2    6.68    0.52
 -10   6  -2    6.80    0.50
 -10   7   2    0.15    0.19
  10   7  -2    0.73    0.23
  10   7  -2    0.39    0.24
  10   7  -2    0.67    0.27
 -10   7   2    0.62    0.16
 -10   7  -2    0.12    0.13
  10   7   2    0.48    0.23
 -10   7  -2    0.54    0.23
  10   8  -2    0.77    0.32
  10   8  -2    0.89    0.31
 -10   8   2    1.10    0.32
  10   8   2    0.58    0.27
 -10   8  -2    0.61    0.26
  10   0   3   92.87    2.82
 -10   0  -3   82.26    3.29
  10   0   3   95.64    3.34
 -10   0   3   90.22    2.89
 -10   0   3   90.52    2.96
 -10  -1  -3   81.74    2.51
  10   1  -3   80.43    2.68
  10  -1   3   83.20    2.54
  10  -1   3   82.85    3.01
 -10  -1  -3   75.95    2.98
 -10   1   3   80.07    2.62
 -10  -1  -3   80.70    2.55
 -10   1  -3   78.65    2.99
  10   1   3   81.58    3.01
 -10   1  -3   82.43    2.52
 -10  -1   3   82.97    2.64
  10   1   3   79.85    2.57
 -10   1  -3   80.58    2.63
  10   2  -3   45.20    1.62
  10  -2   3   44.12    1.79
  10  -2   3   46.50    1.48
 -10   2   3   44.45    1.55
 -10   2  -3   45.13    1.55
 -10  -2   3   44.74    1.50
 -10   2  -3   46.02    1.47
  10   2   3   42.34    1.53
 -10  -2   3   44.93    1.60
 -10   2  -3   45.72    1.40
  10   2   3   44.81    1.58
 -10  -3  -3   47.49    1.96
  10   3  -3   50.16    1.76
 -10   3   3   47.59    1.71
  10   3  -3   48.76    1.77
 -10   3  -3   49.90    1.70
  10   3   3   47.49    1.71
 -10   3  -3   48.29    1.63
 -10   3  -3   48.47    1.54
 -10  -3   3   48.49    1.60
  10   3   3   49.61    1.70
  10   4  -3   16.65    0.81
 -10   4   3   16.42    0.76
  10   4  -3   17.24    0.80
 -10   4  -3   17.98    0.76
  10   4   3   15.58    0.76
 -10   4  -3   17.05    0.72
 -10   4  -3   17.21    0.62
  10   4   3   16.61    0.74
  10   5  -3    4.30    0.39
  10   5  -3    3.76    0.39
  10   5  -3    4.67    0.38
 -10   5   3    2.93    0.32
 -10   5   3    3.34    0.25
 -10   5  -3    4.18    0.35
 -10   5  -3    4.31    0.26
  10   5   3    3.13    0.34
 -10   6   3    4.88    0.43
  10   6  -3    5.60    0.49
 -10   6   3    5.24    0.33
  10   6  -3    5.02    0.46
  10   6  -3    4.87    0.45
  10   6   3    5.93    0.48
 -10   6  -3    5.24    0.32
 -10   6  -3    5.15    0.42
 -10   7   3    0.72    0.24
  10   7  -3    1.09    0.31
  10   7  -3    1.08    0.28
 -10   7   3    0.85    0.18
  10   7  -3    0.74    0.28
 -10   7  -3    0.95    0.17
 -10   7  -3    0.90    0.27
  10   7   3    0.51    0.24
 -10   8   3    0.91    0.31
  10   8  -3    2.10    0.42
  10   8  -3    1.54    0.35
  10   8  -3    1.70    0.41
  10   8   3    1.40    0.35
 -10   8  -3    1.13    0.33
 -10   0  -4   37.48    1.61
 -10   0   4   39.95    1.43
  10   0   4   39.50    1.36
  10   0   4   42.12    1.65
 -10   0  -4   44.21    1.32
  10   0  -4   35.61    1.42
 -10   1   4   49.06    1.64
  10   1  -4   46.61    1.74
 -10  -1  -4   44.70    1.92
 -10   1   4   48.71    1.74
  10  -1   4   52.07    1.96
 -10   1  -4   49.33    1.57
 -10   1  -4   46.46    1.93
 -10   1  -4   50.61    1.57
 -10  -1   4   49.28    1.68
  10   1   4   50.24    1.76
  10   1   4   50.94    1.97
 -10   1  -4   47.15    1.63
  10   1   4   48.22    1.66
 -10   2   4   60.28    2.02
  10   2  -4   59.58    2.12
 -10  -2  -4   56.60    2.34
  10  -2   4   61.64    2.35
 -10   2  -4   65.48    1.91
 -10   2  -4   60.24    1.94
 -10  -2   4   57.89    2.00
  10   2   4   58.14    2.02
 -10   2  -4   59.79    2.00
  10   2   4   59.96    2.10
 -10   2  -4   58.55    1.89
  10   3  -4   42.22    1.66
 -10   3   4   43.39    1.58
  10   3  -4   44.45    1.64
 -10  -3  -4   45.25    1.87
 -10   3  -4   44.52    1.52
  10   3   4   44.25    1.64
 -10  -3   4   45.85    1.61
 -10   3  -4   48.17    1.47
 -10   3  -4   43.83    1.45
 -10   3  -4   44.44    1.56
  10   3   4   42.45    1.60
 -10  -3   4   42.75    1.51
 -10  -4  -4   16.64    0.95
  10   4  -4   17.54    0.85
  10   4  -4   18.94    0.90
 -10   4   4   19.24    0.84
 -10   4  -4   18.07    0.70
 -10  -4   4   20.13    0.81
 -10  -4   4   19.37    0.72
 -10   4  -4   17.42    0.77
 -10   4  -4   18.79    0.80
  10   4   4   18.79    0.87
  10   4   4   18.86    0.84
 -10  -5  -4    1.44    0.29
  10   5  -4    1.48    0.28
  10   5  -4    1.70    0.27
 -10   5   4    2.16    0.27
  10   5  -4    1.78    0.28
  10   5   4    1.89    0.29
 -10   5  -4    1.85    0.19
 -10   5  -4    1.89    0.25
 -10   5  -4    1.57    0.24
  10   6  -4    2.61    0.38
  10   6  -4    1.95    0.32
 -10   6   4    2.07    0.31
  10   6  -4    1.76    0.31
 -10   6  -4    2.45    0.31
  10   6   4    2.24    0.34
 -10   6  -4    2.60    0.23
 -10   7   4    4.03    0.44
  10   7  -4    3.45    0.45
  10   7  -4    2.80    0.40
  10   7  -4    3.02    0.46
 -10   7  -4    3.32    0.30
  10   7   4    2.96    0.42
 -10   7  -4    3.66    0.41
 -10   0  -5   18.37    0.94
  10   0   5   19.78    0.80
  10   0  -5   19.35    0.75
 -10   0   5   19.98    0.83
 -10   1   5   39.82    1.34
 -10  -1  -5   38.81    1.65
  10   1  -5   36.91    1.47
 -10   1   5   39.75    1.49
  10   1   5   38.08    1.49
  10   1   5   38.27    1.41
 -10   1  -5   40.21    1.31
 -10   1  -5   38.80    1.64
 -10  -1   5   39.83    1.43
 -10  -2  -5   43.70    1.87
  10   2  -5   40.66    1.66
 -10   2   5   45.95    1.70
 -10   2   5   46.60    1.55
 -10   2  -5   43.88    1.84
  10   2   5   44.22    1.61
 -10   2  -5   45.25    1.50
 -10   2  -5   43.30    1.52
 -10  -2   5   45.35    1.58
  10   2   5   44.12    1.67
  10   3  -5   29.45    1.18
 -10  -3  -5   27.14    1.33
 -10   3   5   29.32    1.10
  10   3  -5   29.18    1.22
 -10   3  -5   28.01    1.00
  10   3   5   27.72    1.15
 -10   3  -5   27.87    1.05
  10   3   5   28.69    1.18
 -10   3  -5   27.42    1.04
 -10  -3   5   27.30    1.05
 -10   4   5   10.63    0.56
 -10  -4  -5    9.05    0.66
  10   4  -5    9.34    0.62
  10   4  -5   10.33    0.60
  10   4   5    9.83    0.60
 -10   4  -5   10.60    0.47
  10   4   5   10.17    0.61
 -10   4  -5   10.71    0.53
 -10   4  -5   10.35    0.52
 -10  -4   5    9.13    0.46
 -10  -5  -5    7.02    0.59
  10   5  -5    6.58    0.50
 -10   5   5    6.80    0.48
  10   5  -5    6.21    0.53
 -10   5  -5    6.94    0.45
  10   5   5    6.50    0.50
 -10   5  -5    6.74    0.38
  10   5   5    6.24    0.50
 -10   5  -5    7.69    0.46
 -10   6   5    2.11    0.32
  10   6  -5    2.13    0.34
  10   6  -5    1.53    0.32
  10   6  -5    1.57    0.34
 -10   6  -5    1.81    0.22
  10   6   5    1.61    0.33
 -10   6  -5    2.14    0.29
 -10   6  -5    1.99    0.30
  10   7  -5    0.82    0.34
  10   7  -5    0.56    0.30
 -10   7   5    0.65    0.26
  10   7  -5    0.60    0.27
  10   7   5    0.80    0.31
 -10   7  -5    1.25    0.29
 -10   0  -6   56.68    1.80
  10   0   6   49.33    1.97
  10   0  -6   52.97    1.92
 -10   0   6   52.67    1.93
 -10   0  -6   52.75    2.17
  10   1  -6   26.25    1.16
 -10  -1  -6   26.75    1.28
 -10   1   6   27.77    1.16
 -10   1   6   27.25    0.97
 -10  -1   6   28.31    1.11
  10   1   6   26.48    1.17
 -10   1  -6   29.38    1.01
  10  -1  -6   26.04    1.11
  10   1   6   28.19    1.12
 -10   1  -6   28.06    1.28
 -10  -2  -6   21.44    1.07
 -10   2   6   19.34    0.94
 -10   2   6   20.39    0.80
  10   2  -6   18.49    0.93
 -10   2  -6   21.15    0.76
 -10   2  -6   20.06    1.02
 -10   2  -6   21.22    0.79
  10   2   6   19.32    0.94
  10   2   6   20.21    0.91
 -10  -2   6   18.35    0.83
 -10   3   6    4.98    0.35
 -10  -3  -6    6.22    0.53
  10   3  -6    5.91    0.47
  10   3   6    5.65    0.44
  10   3   6    5.21    0.43
 -10   3  -6    6.07    0.34
 -10  -3   6    4.59    0.34
 -10   3  -6    6.40    0.37
 -10   3  -6    5.77    0.34
 -10   4   6   12.29    0.62
  10   4  -6   10.93    0.70
 -10  -4  -6   10.87    0.78
  10   4  -6   12.21    0.69
 -10  -4   6   10.77    0.55
  10   4   6   11.78    0.69
 -10   4  -6   12.21    0.59
 -10   4  -6   11.01    0.55
  10   4   6   11.84    0.70
 -10   4  -6   11.04    0.53
 -10   5   6   11.90    0.66
  10   5  -6   11.42    0.76
  10   5  -6   11.27    0.70
 -10   5  -6   12.24    0.62
 -10   5  -6   11.39    0.55
  10   5   6   10.46    0.70
 -10   5  -6   10.72    0.62
  10   5   6   11.46    0.72
 -10   6   6    2.01    0.33
  10   6  -6    1.46    0.32
  10   6  -6    1.70    0.32
  10   6  -6    1.37    0.36
  10   6   6    1.71    0.35
 -10   6  -6    1.79    0.24
 -10   0  -7   26.51    0.97
 -10   0   7   23.67    1.07
  10   0   7   23.88    1.13
 -10   0  -7   24.40    1.22
 -10   1   7   18.34    0.91
  10   1  -7   18.48    0.92
 -10  -1  -7   18.51    1.01
  10   1   7   19.15    0.94
 -10   1  -7   18.60    1.00
 -10   1  -7   20.83    0.79
  10   1   7   19.49    0.90
 -10  -1   7   17.61    0.85
  10  -1  -7   17.75    0.83
  10   2  -7   10.56    0.67
 -10  -2  -7   12.56    0.78
 -10   2   7   10.84    0.68
  10   2   7   12.03    0.71
 -10   2  -7   11.83    0.56
 -10  -2   7   10.67    0.60
 -10   2  -7   11.63    0.73
  10   2   7   12.36    0.69
  10  -2  -7   11.35    0.64
 -10   3   7    8.68    0.63
  10   3  -7    9.79    0.65
 -10  -3  -7   11.24    0.76
 -10  -3   7    9.08    0.52
  10   3   7    9.61    0.62
 -10   3  -7    9.91    0.52
  10   3   7    9.14    0.63
  10   4  -7    5.87    0.54
  10   4  -7    7.26    0.53
 -10   4  -7    6.62    0.40
  10   4   7    6.76    0.54
  10   4   7    5.57    0.51
  10   5  -7    4.67    0.53
  10   5  -7    4.68    0.48
 -10   5  -7    4.78    0.36
  10   5   7    5.14    0.52
  10   5   7    4.31    0.49
  10   6  -7    0.59    0.25
  10   6  -7    0.81    0.35
 -10   6  -7    0.90    0.22
  10   6   7    0.71    0.28
 -10   0  -8   15.13    0.68
 -10   0  -8   13.99    0.85
  10   0   8   12.38    0.78
 -10   0   8   12.70    0.74
  10   0  -8   12.53    0.75
 -10   1   8    6.91    0.53
  10  -1   8    6.19    0.54
  10   1  -8    7.36    0.55
 -10  -1  -8    7.54    0.61
 -10   1  -8    7.78    0.60
  10   1   8    7.59    0.56
 -10  -1   8    7.55    0.51
  10   2  -8   17.54    0.96
 -10  -2  -8   18.83    1.08
 -10   2   8   17.43    0.96
  10   2   8   16.94    0.96
 -10   2  -8   19.99    1.05
  10   2   8   19.67    0.97
 -10  -2   8   17.16    0.87
  10   3  -8   12.43    0.78
 -10   3   8   12.89    0.81
 -10  -3   8   11.02    0.65
  10   3   8   11.16    0.76
  10   3   8   12.06    0.76
  10   4  -8    1.98    0.38
  10   4  -8    2.08    0.34
  10   4   8    3.26    0.44
  10   4   8    2.95    0.42
 -10   4  -8    2.25    0.27
  10   5  -8    1.72    0.40
  10   5   8    1.86    0.39
  10   5   8    2.39    0.41
 -10   5  -8    2.16    0.28
  10   0   9    3.67    0.45
 -10   0  -9    4.28    0.49
 -10   0   9    4.07    0.43
  10   0  -9    3.28    0.41
 -10   1   9    7.51    0.59
  10   1  -9    7.31    0.59
  10  -1   9    7.07    0.60
 -10  -1   9    8.23    0.57
 -10   1  -9    8.07    0.65
  10   1   9    7.17    0.62
  10  -2   9    8.05    0.67
  10   2  -9    8.16    0.64
 -10   2   9    8.69    0.66
 -10  -2   9   10.21    0.63
  10   2   9    8.11    0.66
  10   3  -9    6.09    0.59
 -10   3   9    6.98    0.62
  10   3   9    6.37    0.62
 -10  -3   9    6.25    0.51
  10   4  -9    4.37    0.55
  10   4   9    3.53    0.50
 -10   4  -9    4.68    0.40
  10   4   9    3.68    0.50
  10   0  10   10.57    0.80
  10   0 -10   10.78    0.77
 -10   0  10   10.91    0.75
  10  -1  10    7.91    0.67
 -10   1  10    7.09    0.61
  10   1 -10    6.38    0.59
  10   1  10    5.75    0.61
 -10  -1  10    6.91    0.58
  10  -1 -10    6.14    0.60
 -10   2  10    2.07    0.40
  10  -2  10    1.60    0.39
  10   2 -10    1.89    0.38
  10   2  10    1.90    0.41
 -10  -2  10    1.78    0.33
  11   0   0    0.04    0.05
 -11   0   0    0.05    0.05
 -11   0   0    0.04    0.05
  11   0   0    0.09    0.04
 -11   1   0    4.88    0.28
 -11  -1   0    5.31    0.26
  11   1   0    5.14    0.28
  11   1   0    5.43    0.29
  11  -1   0    5.10    0.30
 -11  -1   0    5.02    0.28
  11   1   0    4.75    0.25
  11   2   0    8.28    0.37
 -11  -2   0    8.13    0.42
  11   2   0    8.25    0.40
  11   2   0    8.40    0.42
 -11   3   0   32.81    1.23
  11   3   0   32.75    1.22
  11   3   0   32.24    1.25
  11   3   0   34.26    1.18
  11   4   0    0.83    0.18
 -11   4   0    0.82    0.17
  11   4   0    1.45    0.23
  11   4   0    1.15    0.18
  11   5   0   38.18    1.53
 -11   5   0   41.13    1.25
 -11   5   0   37.28    1.50
  11   5   0   38.01    1.47
  11   5   0   37.69    1.55
  11   6   0    7.64    0.58
  11   6   0    7.71    0.53
 -11   6   0    6.89    0.52
  11   6   0    7.87    0.57
 -11   6   0    7.33    0.35
 -11   7   0   16.00    0.90
  11   7   0   15.94    0.89
  11   8   0   13.20    0.86
 -11   8   0   13.84    0.88
  11   0   1    0.09    0.03
 -11   0  -1    0.03    0.05
 -11   0   1    0.06    0.05
 -11   0  -1    0.01    0.05
  11   0   1    0.01    0.04
  11   0  -1    0.01    0.04
  11   0   1    0.01    0.05
  11   1  -1   62.80    2.08
  11  -1   1   63.80    2.34
 -11  -1  -1   64.08    2.01
 -11   1   1   63.23    2.10
 -11  -1  -1   60.68    2.32
  11   1  -1   65.98    2.03
  11   1   1   63.80    2.09
 -11   1  -1   60.71    2.33
  11   1   1   64.81    1.97
  11   1   1   63.94    2.02
  11   1   1   65.75    2.35
 -11   1  -1   62.44    2.10
 -11  -1   1   62.00    2.25
  11  -2   1   15.60    0.73
 -11  -2  -1   15.86    0.73
  11   2  -1   16.94    0.68
 -11   2   1   15.01    0.65
  11  -2   1   16.26    0.59
  11   2  -1   16.19    0.66
 -11   2  -1   16.25    0.66
 -11  -2   1   15.55    0.65
  11   2   1   16.51    0.61
  11   2   1   15.43    0.67
  11   2   1   15.32    0.62
  11   2   1   16.05    0.58
  11   3  -1   11.81    0.55
  11   3  -1   12.19    0.58
  11   3  -1   12.04    0.59
 -11   3   1   11.75    0.57
  11   3   1   12.03    0.56
  11   3   1   12.41    0.60
  11   3   1   12.42    0.55
  11   3   1   13.17    0.48
 -11   3  -1   11.36    0.56
 -11   4   1   21.69    0.95
  11   4  -1   23.43    0.94
  11   4  -1   23.47    1.00
  11   4  -1   23.68    0.99
  11   4   1   22.01    0.93
 -11   4  -1   23.00    0.96
  11   4   1   23.22    0.97
 -11  -4   1   23.53    0.76
  11   4   1   22.60    1.00
 -11   5   1   30.17    1.26
 -11   5   1   32.09    1.02
  11   5  -1   32.14    1.31
  11   5  -1   30.18    1.28
  11   5  -1   30.61    1.23
 -11   5  -1   28.28    1.23
  11   5   1   29.01    1.30
  11   5   1   30.52    1.24
  11   5   1   31.16    1.28
 -11   5  -1   31.17    1.01
  11   6  -1   34.98    1.47
 -11   6   1   34.64    1.15
  11   6  -1   33.45    1.40
 -11   6   1   32.10    1.41
 -11   6  -1   32.47    1.40
 -11   6  -1   33.66    1.14
  11   6   1   35.27    1.42
  11   7  -1    6.98    0.60
 -11   7   1    8.29    0.40
  11   7  -1    7.47    0.63
 -11   7   1    7.55    0.58
  11   7  -1    8.50    0.61
 -11   7  -1    8.09    0.59
  11   7   1    7.93    0.59
 -11   8   1   13.75    0.89
 -11   8  -1   14.98    0.92
  11   8   1   14.14    0.90
 -11   0   2    0.01    0.06
  11   0  -2    0.02    0.04
  11   0   2   -0.02    0.05
  11   0   2    0.09    0.05
 -11   0  -2    0.00    0.06
  11   0   2    0.03    0.07
  11   1  -2   17.90    0.74
 -11  -1  -2   18.21    0.82
 -11   1   2   17.73    0.72
  11  -1   2   19.32    0.63
  11  -1   2   18.99    0.62
 -11  -1  -2   18.32    0.64
 -11   1  -2   17.26    0.83
 -11   1  -2   18.16    0.72
  11   1   2   19.85    0.73
  11   1   2   18.61    0.67
  11   1   2   19.78    0.85
 -11   2   2   11.92    0.55
 -11  -2  -2   13.69    0.50
  11  -2   2   11.96    0.64
 -11  -2  -2   12.60    0.64
  11  -2   2   12.96    0.48
  11   2  -2   13.46    0.59
  11   2  -2   12.84    0.59
 -11   2  -2   13.60    0.57
  11   2   2   12.67    0.53
  11   2   2   12.41    0.52
 -11  -2   2   12.08    0.51
  11   2   2   11.88    0.57
 -11   3   2   21.38    0.88
  11   3  -2   21.50    0.91
  11  -3   2   22.28    1.01
 -11  -3  -2   22.28    1.01
  11   3  -2   22.60    0.92
  11   3   2   21.60    0.86
  11   3   2   21.94    0.93
 -11   3  -2   21.76    0.88
  11   3   2   22.20    0.83
  11   4  -2    9.95    0.57
  11   4  -2    9.68    0.57
  11   4  -2    9.40    0.52
 -11   4   2    9.78    0.54
 -11   4  -2   10.39    0.37
  11   4   2    9.65    0.59
 -11   4  -2   10.19    0.54
 -11   4  -2   11.01    0.38
  11   4   2    9.49    0.53
 -11   5   2   36.56    1.16
  11   5  -2   33.49    1.40
  11   5  -2   33.39    1.42
  11   5  -2   35.03    1.37
 -11   5   2   32.24    1.37
 -11   5  -2   33.89    1.36
 -11   5  -2   35.24    1.14
  11   5   2   35.47    1.38
  11   6  -2   17.66    0.92
 -11   6   2   17.21    0.92
  11   6  -2   19.77    0.99
  11   6  -2   19.06    0.99
 -11   6   2   20.06    0.73
  11   6   2   18.05    0.93
 -11   6  -2   19.30    0.93
 -11   6  -2   20.30    0.72
  11   7  -2   18.21    1.03
  11   7  -2   18.00    1.01
  11   7  -2   18.83    0.98
 -11   7   2   16.62    0.95
 -11   7   2   18.89    0.71
  11   7   2   18.84    1.00
 -11   7  -2   17.18    0.95
 -11   8   2    2.12    0.40
  11   8  -2    2.30    0.41
  11   8  -2    2.34    0.46
  11   8   2    3.07    0.46
 -11   8  -2    2.85    0.43
  11   0  -3    0.08    0.03
 -11   0  -3    0.06    0.07
  11   0   3    0.05    0.08
 -11   0   3    0.01    0.05
  11   0   3    0.01    0.06
 -11   0  -3    0.01    0.02
 -11   0   3    0.02    0.05
  11   1  -3   73.36    2.53
  11  -1   3   80.30    2.86
 -11  -1  -3   76.01    2.39
 -11  -1  -3   71.59    2.82
  11  -1   3   75.71    2.39
 -11   1   3   74.33    2.48
 -11  -1  -3   75.84    2.35
 -11   1  -3   73.98    2.48
  11   1   3   75.43    2.42
  11   1   3   79.44    2.86
 -11   1  -3   73.60    2.83
 -11  -1   3   76.66    2.48
 -11   1  -3   78.25    2.38
 -11  -2  -3   16.48    0.83
  11  -2   3   16.34    0.82
  11   2  -3   16.25    0.74
  11  -2   3   17.15    0.61
 -11   2   3   16.14    0.68
  11   2   3   16.25    0.69
 -11   2  -3   17.26    0.60
  11   2   3   17.82    0.71
 -11  -2   3   16.66    0.61
 -11   2  -3   16.98    0.69
 -11   2  -3   16.79    0.53
  11   3  -3    9.89    0.56
 -11  -3  -3   10.63    0.62
  11   3  -3   10.49    0.56
 -11   3   3   10.01    0.52
  11   3   3   10.20    0.51
 -11   3  -3   10.65    0.38
 -11  -3   3   10.50    0.41
  11   3   3    9.77    0.53
 -11   3  -3   11.19    0.47
 -11   3  -3   11.35    0.39
 -11   3  -3   10.95    0.52
  11   4  -3   27.44    1.16
  11   4  -3   28.40    1.15
 -11  -4  -3   27.06    1.26
 -11   4   3   25.96    1.09
 -11   4  -3   26.86    1.07
  11   4   3   27.24    1.11
  11   4   3   27.22    1.07
 -11   4  -3   27.28    0.90
 -11  -4   3   26.37    0.92
  11   5  -3   23.46    1.10
  11   5  -3   24.43    1.06
 -11   5   3   24.46    1.06
  11   5  -3   23.81    1.08
 -11   5  -3   23.10    1.02
  11   5   3   23.88    1.06
 -11   5  -3   24.12    0.84
  11   6  -3   15.49    0.90
  11   6  -3   16.07    0.86
 -11   6   3   17.70    0.89
  11   6  -3   16.21    0.89
 -11   6  -3   16.68    0.65
  11   6   3   17.97    0.91
 -11   6  -3   16.35    0.85
  11   7  -3   12.20    0.78
 -11   7   3   12.72    0.79
  11   7  -3   14.63    0.86
  11   7  -3   13.36    0.86
 -11   7  -3   12.47    0.77
  11   7   3   12.97    0.81
  11   0  -4   -0.04    0.04
  11   0   4    0.16    0.12
  11   0   4    0.00    0.07
 -11   0  -4    0.14    0.10
 -11   0  -4    0.16    0.07
 -11   0   4    0.10    0.08
 -11  -1  -4    1.53    0.14
  11  -1   4    2.01    0.26
 -11   1   4    1.90    0.21
 -11  -1  -4    1.66    0.23
 -11   1   4    1.86    0.17
  11   1  -4    1.37    0.20
 -11   1  -4    1.47    0.10
  11   1   4    1.97    0.20
  11   1   4    1.88    0.26
 -11   1  -4    1.80    0.17
 -11   1  -4    1.58    0.11
 -11  -1   4    1.96    0.18
 -11   1  -4    1.80    0.24
  11   1   4    1.83    0.21
  11   2  -4    0.68    0.16
 -11  -2  -4    0.30    0.14
 -11   2   4    0.23    0.10
 -11   2  -4    0.48    0.08
  11   2   4    0.40    0.13
 -11   2  -4    0.46    0.09
 -11  -2   4    0.53    0.10
  11   2   4    0.30    0.12
 -11   2  -4    0.33    0.10
  11   3  -4   30.06    1.21
 -11  -3  -4   29.89    1.38
  11   3  -4   30.74    1.25
 -11   3   4   29.60    1.15
 -11   3  -4   30.75    1.08
 -11   3  -4   28.86    1.13
 -11  -3   4   30.46    1.11
 -11  -3   4   29.59    1.06
 -11   3  -4   30.50    1.00
  11   3   4   30.10    1.18
  11   3   4   30.82    1.20
 -11  -4  -4    8.00    0.59
  11   4  -4    8.43    0.54
 -11   4   4    7.33    0.47
  11   4  -4    8.27    0.52
 -11   4  -4    7.78    0.36
 -11   4  -4    8.38    0.47
  11   4   4    7.87    0.48
  11   4   4    7.42    0.50
 -11  -4   4    8.47    0.37
 -11   4  -4    8.44    0.44
 -11   5   4   18.39    0.88
 -11  -5  -4   18.19    1.02
  11   5  -4   19.14    0.96
  11   5  -4   17.59    0.89
  11   5  -4   20.19    0.94
 -11   5  -4   18.14    0.84
 -11   5  -4   19.11    0.84
  11   5   4   18.44    0.91
 -11   5  -4   17.86    0.70
  11   6  -4    0.11    0.18
 -11   6   4    0.05    0.15
  11   6  -4    0.06    0.16
  11   6  -4    0.12    0.16
  11   6   4    0.21    0.19
 -11   6  -4    0.09    0.11
 -11   6  -4    0.16    0.17
  11   7  -4   11.45    0.78
 -11   7   4   10.91    0.72
  11   7  -4   11.08    0.74
  11   7  -4   11.31    0.81
  11   7   4   10.46    0.75
 -11   7  -4   12.40    0.74
 -11   0  -5    0.13    0.11
 -11   0   5    0.00    0.08
  11   0  -5    0.02    0.05
  11   0   5   -0.14    0.08
 -11   0  -5   -0.01    0.05
 -11   1   5    0.26    0.10
 -11  -1  -5    0.18    0.13
 -11   1   5    0.49    0.15
  11   1  -5    0.36    0.14
 -11  -1   5    0.28    0.11
 -11   1  -5    0.16    0.10
  11   1   5    0.35    0.14
  11   1   5    0.31    0.14
 -11   1  -5    0.28    0.07
 -11   1  -5    0.14    0.13
 -11   2   5    8.15    0.42
 -11  -2  -5    7.90    0.56
  11   2  -5    8.35    0.52
 -11   2   5    8.90    0.52
 -11  -2   5    8.57    0.43
  11   2   5    7.60    0.49
  11   2   5    9.19    0.51
 -11   2  -5    7.23    0.53
 -11   2  -5    8.32    0.37
 -11   2  -5    8.11    0.41
  11   3  -5    6.45    0.49
  11   3  -5    7.76    0.50
 -11   3   5    6.95    0.42
 -11  -3  -5    7.20    0.55
  11   3   5    7.30    0.48
 -11   3  -5    7.88    0.36
  11   3   5    7.54    0.48
 -11   3  -5    7.38    0.40
 -11   3  -5    7.49    0.38
 -11  -3   5    6.99    0.38
  11   4  -5   19.15    0.97
  11   4  -5   20.18    0.94
 -11  -4  -5   19.06    1.07
 -11   4   5   20.50    0.89
 -11   4  -5   19.54    0.84
 -11  -4   5   19.83    0.78
  11   4   5   19.54    0.94
 -11   4  -5   20.24    0.83
 -11   4  -5   19.83    0.75
  11   4   5   20.13    0.94
  11   5  -5    8.32    0.57
  11   5  -5    7.53    0.58
 -11  -5  -5    6.71    0.60
 -11   5   5    7.95    0.53
 -11   5  -5    8.44    0.49
  11   5   5    8.67    0.56
 -11   5  -5    7.85    0.40
 -11   5  -5    8.01    0.50
  11   5   5    7.86    0.56
  11   6  -5   12.41    0.76
  11   6  -5   11.72    0.79
 -11   6   5   10.32    0.68
  11   6  -5   11.27    0.73
  11   6   5    9.46    0.69
 -11   6  -5   11.95    0.67
 -11   6  -5   11.62    0.53
  11   7  -5    8.97    0.69
  11   7  -5    9.20    0.75
  11   7  -5    9.31    0.69
 -11   7   5    7.61    0.62
  11   7   5    7.37    0.65
 -11   7  -5    7.76    0.59
 -11   0  -6    0.30    0.15
  11   0  -6    0.00    0.06
 -11   0  -6    0.12    0.08
  11   0   6    0.07    0.11
 -11   0   6    0.07    0.12
 -11   1   6    3.60    0.24
 -11   1   6    4.24    0.36
 -11  -1  -6    3.81    0.40
  11   1  -6    3.13    0.34
  11  -1  -6    3.35    0.26
 -11  -1   6    4.19    0.32
  11   1   6    3.64    0.36
  11   1   6    3.78    0.34
 -11   1  -6    3.54    0.36
 -11   1  -6    3.84    0.24
 -11   2   6    4.58    0.30
 -11  -2  -6    4.07    0.41
 -11   2   6    4.78    0.40
  11   2  -6    4.46    0.40
 -11   2  -6    4.12    0.27
 -11  -2   6    4.92    0.34
  11   2   6    5.08    0.42
 -11   2  -6    4.41    0.41
  11   2   6    4.33    0.38
 -11   2  -6    4.72    0.28
  11   3  -6    7.02    0.52
 -11   3   6    7.48    0.43
 -11  -3  -6    6.49    0.56
 -11   3  -6    6.96    0.39
 -11   3  -6    6.93    0.37
 -11   3  -6    7.19    0.39
  11   3   6    7.27    0.50
  11   3   6    6.58    0.50
 -11  -3   6    6.83    0.41
 -11   4   6    1.56    0.24
 -11  -4  -6    1.23    0.30
  11   4  -6    1.81    0.31
  11   4  -6    2.15    0.31
  11   4   6    2.58    0.34
  11   4   6    1.91    0.30
 -11   4  -6    1.57    0.22
 -11   4  -6    1.60    0.19
 -11   4  -6    1.66    0.23
  11   5  -6   12.61    0.75
  11   5  -6   11.92    0.79
 -11   5   6   13.21    0.70
 -11   5  -6   12.33    0.65
  11   5   6   11.90    0.76
 -11   5  -6   12.56    0.57
  11   5   6   11.95    0.75
 -11   5  -6   12.61    0.66
  11   6  -6   11.24    0.75
  11   6  -6   10.67    0.79
  11   6  -6   11.96    0.76
 -11   6   6   11.10    0.70
  11   6   6   10.83    0.75
  11   0   7    0.02    0.14
 -11   0  -7    0.08    0.10
 -11   0  -7    0.12    0.15
 -11   0   7    0.22    0.14
 -11   1   7    7.03    0.51
  11   1  -7    7.02    0.52
 -11  -1  -7    7.97    0.60
  11   1   7    7.86    0.53
 -11  -1   7    6.83    0.47
  11   1   7    7.95    0.56
 -11   1  -7    7.41    0.57
 -11   1  -7    8.78    0.42
 -11  -2  -7    3.34    0.42
  11   2  -7    2.95    0.36
 -11   2   7    2.79    0.35
  11   2   7    3.19    0.36
 -11   2  -7    2.80    0.37
  11   2   7    2.40    0.34
 -11   2  -7    2.96    0.25
  11  -2  -7    2.42    0.29
 -11  -2   7    2.56    0.28
 -11  -3  -7    0.77    0.28
  11   3  -7    0.98    0.25
  11   3   7    0.78    0.23
  11   3   7    0.54    0.23
 -11   3  -7    0.89    0.17
 -11  -3   7    0.76    0.18
  11   4  -7   10.15    0.64
  11   4  -7    9.70    0.68
  11   4   7    9.02    0.64
 -11   4  -7    8.94    0.48
  11   4   7    8.10    0.63
  11   5  -7    1.62    0.32
  11   5  -7    1.22    0.33
 -11   5  -7    1.57    0.21
  11   5   7    1.21    0.32
  11   5   7    1.46    0.33
  11   6  -7   11.41    0.77
  11   6  -7   10.68    0.82
  11   6   7   10.47    0.77
  11   0   8   -0.01    0.15
 -11   0   8    0.09    0.15
  11   0  -8    0.05    0.14
 -11   0  -8    0.07    0.16
  11   1  -8    0.09    0.16
 -11   1   8    0.08    0.14
 -11  -1  -8    0.21    0.19
  11  -1   8    0.13    0.16
 -11   1  -8    0.09    0.18
  11   1   8    0.31    0.18
 -11  -1   8    0.19    0.16
 -11  -2  -8    0.34    0.21
 -11   2   8    0.08    0.17
  11   2  -8    0.22    0.18
  11   2   8    0.34    0.19
 -11  -2   8    0.25    0.17
 -11   2  -8    0.13    0.19
  11   2   8    0.31    0.20
  11   3  -8    3.33    0.43
  11   3   8    4.94    0.50
  11   3   8    4.47    0.47
 -11  -3   8    4.50    0.40
  11   4  -8   10.30    0.70
  11   4  -8    9.97    0.75
  11   4   8    9.20    0.72
 -11   4  -8   11.10    0.56
  11   4   8   10.09    0.71
  11   5  -8    6.01    0.55
  11   5  -8    5.56    0.61
  11   5   8    6.08    0.60
  11   5   8    6.35    0.63
 -11   5  -8    6.06    0.41
 -11   0   9    0.14    0.19
  11   0  -9    0.12    0.17
  11   0   9    0.05    0.20
  11  -1   9    1.52    0.34
  11   1  -9    1.29    0.31
 -11   1   9    1.15    0.29
 -11  -1   9    1.67    0.30
  11   1   9    1.44    0.34
 -11   1  -9    1.37    0.33
  11  -2   9    1.34    0.33
 -11   2   9    1.33    0.32
  11   2  -9    1.28    0.31
 -11  -2   9    1.17    0.27
  11   2   9    1.61    0.35
  11   3  -9    0.95    0.30
  11   3   9    1.84    0.37
  11   4  -9    4.76    0.56
  11   4   9    4.57    0.57
  11   4   9    3.49    0.49
 -11   4  -9    4.75    0.38
  11   0 -10    0.23    0.23
 -11   0  10    0.25    0.22
  11   0  10    0.25    0.24
 -11   1  10    0.44    0.25
  11   1 -10    0.39    0.27
  11  -1  10    0.63    0.30
  11  -1 -10    0.58    0.26
  11   1  10    0.40    0.28
 -11  -1  10    0.19    0.21
  11   2 -10    1.63    0.37
  11  -2  10    2.27    0.44
 -11   2  10    1.69    0.38
  11   2  10    1.85    0.40
 -11  -2  10    2.50    0.37
  12   0   0  195.87    5.87
 -12   0   0  185.88    5.97
  12   0   0  193.18    6.61
 -12   0   0  183.25    6.60
  12   1   0    1.62    0.16
  12  -1   0    1.55    0.17
  12   1   0    1.65    0.16
 -12  -1   0    2.05    0.15
 -12   1   0    1.44    0.16
  12   1   0    1.57    0.13
 -12  -1   0    1.33    0.14
  12   2   0   95.31    3.15
  12   2   0   94.88    3.09
 -12  -2   0   94.84    3.44
  12   2   0   99.27    3.00
 -12   3   0   15.26    0.68
  12   3   0   15.93    0.71
  12   3   0   15.04    0.64
  12   3   0   15.41    0.68
 -12   4   0    9.31    0.51
  12   4   0    9.51    0.50
  12   4   0    8.01    0.49
  12   4   0    9.02    0.54
  12   5   0    7.01    0.46
 -12   5   0    5.25    0.42
  12   5   0    6.42    0.46
  12   5   0    6.48    0.49
 -12   6   0    6.05    0.47
  12   6   0    5.83    0.49
  12   6   0    5.29    0.51
  12   6   0    5.33    0.45
  12   7   0    1.99    0.33
 -12   7   0    1.58    0.30
 -12   8   0    0.53    0.25
  12   8   0    0.61    0.28
  12   0   1   39.42    1.33
 -12   0  -1   38.75    1.52
 -12   0  -1   39.16    1.38
  12   0   1   39.44    1.26
  12   0   1   40.08    1.54
 -12   0   1   38.77    1.38
  12   0  -1   41.93    1.47
  12  -1   1  171.76    5.93
  12   1  -1  175.28    5.32
 -12  -1  -1  174.45    5.21
  12   1  -1  169.68    5.28
 -12  -1  -1  161.46    5.91
  12   1   1  169.10    5.21
  12   1   1  172.74    5.09
  12   1   1  164.67    5.30
 -12  -1   1  163.33    5.84
 -12   1  -1  163.27    5.93
  12  -1  -1  161.69    5.87
  12   1   1  173.23    5.93
  12  -2   1   18.19    0.64
  12   2  -1   16.90    0.72
  12  -2   1   17.47    0.79
 -12   2   1   16.48    0.70
 -12  -2  -1   16.42    0.77
  12   2  -1   16.79    0.70
 -12  -2   1   17.09    0.71
 -12   2  -1   17.01    0.71
  12   2   1   18.08    0.63
  12   2   1   16.99    0.65
  12   2   1   17.75    0.67
 -12  -3  -1   87.02    3.26
  12   3  -1   88.23    2.85
  12   3  -1   89.51    2.94
  12  -3   1   90.83    3.28
 -12   3   1   87.60    2.95
  12   3  -1   88.07    2.97
  12   3   1   87.60    2.91
  12   3   1   90.28    2.86
  12   3   1   89.37    2.85
 -12   3  -1   86.67    2.94
  12   3   1   89.08    2.98
  12   4  -1    7.19    0.45
  12   4  -1    6.69    0.46
  12   4  -1    6.99    0.42
 -12   4   1    6.42    0.43
  12   4   1    6.59    0.43
 -12   4  -1    7.06    0.43
  12   4   1    6.76    0.42
  12   4   1    6.38    0.46
  12   5  -1   61.19    2.25
 -12   5   1   60.56    2.21
  12   5  -1   58.04    2.14
  12   5  -1   58.50    2.23
 -12   5  -1   60.23    2.20
  12   5   1   61.94    2.28
  12   5   1   63.67    2.24
  12   5   1   63.40    2.17
 -12   6   1    4.72    0.45
  12   6  -1    5.43    0.48
  12   6  -1    5.71    0.46
  12   6  -1    5.41    0.49
 -12   6   1    6.23    0.27
  12   6   1    5.59    0.51
 -12   6  -1    5.57    0.47
  12   6   1    5.35    0.46
  12   7  -1    2.19    0.38
  12   7  -1    2.06    0.35
 -12   7   1    2.31    0.35
  12   7  -1    2.59    0.42
  12   7   1    2.49    0.37
 -12   7  -1    2.56    0.36
 -12   8   1    1.94    0.39
  12   8  -1    2.17    0.39
 -12   8  -1    2.51    0.40
  12   8   1    1.76    0.37
  12   0  -2  194.86    6.73
  12   0   2  201.62    6.87
 -12   0  -2  190.25    6.85
  12   0   2  196.92    6.06
 -12   0   2  189.04    6.11
  12   0   2  195.38    5.87
  12  -1   2   23.17    0.73
  12  -1   2   21.78    0.72
 -12  -1  -2   20.77    0.73
  12   1  -2   20.57    0.84
 -12   1   2   21.19    0.83
 -12  -1  -2   19.37    0.92
  12  -1   2   22.39    0.96
 -12   1  -2   20.66    0.95
  12   1   2   24.19    0.98
  12   1   2   22.61    0.83
  12   1   2   22.26    0.77
 -12   1  -2   21.00    0.83
  12   2  -2   74.99    2.55
  12  -2   2   78.76    2.41
 -12  -2  -2   74.69    2.85
  12  -2   2   77.39    2.86
  12   2  -2   74.54    2.56
 -12   2   2   73.78    2.53
  12   2   2   78.85    2.44
 -12   2  -2   76.21    2.53
  12   2   2   76.16    2.52
  12   2   2   77.43    2.56
 -12  -2   2   76.36    2.69
 -12  -3  -2    0.36    0.14
  12   3  -2    0.31    0.13
  12   3  -2    0.36    0.13
 -12   3   2    0.33    0.12
 -12   3  -2    0.31    0.11
  12   3   2    0.63    0.17
  12   3   2    0.56    0.11
  12   3   2    0.34    0.11
  12   4  -2   32.59    1.29
  12   4  -2   32.07    1.22
 -12  -4  -2   31.10    1.39
 -12   4   2   30.86    1.24
  12   4  -2   32.08    1.28
  12   4   2   29.91    1.21
 -12   4  -2   33.87    1.25
  12   4   2   29.87    1.29
 -12   5   2    9.01    0.55
  12   5  -2    8.99    0.58
  12   5  -2    9.02    0.58
  12   5  -2    9.24    0.55
 -12   5  -2    8.56    0.53
  12   5   2    8.36    0.54
 -12   6   2    8.31    0.57
  12   6  -2    8.48    0.57
  12   6  -2    8.54    0.60
  12   6  -2    8.15    0.60
  12   6   2    8.12    0.58
 -12   6  -2    8.76    0.57
  12   7  -2    3.43    0.43
  12   7  -2    2.93    0.43
 -12   7   2    2.64    0.38
  12   7  -2    3.38    0.44
 -12   7  -2    2.77    0.38
  12   7   2    2.85    0.40
 -12   8   2    0.77    0.29
  12   8  -2    0.39    0.26
  12   8  -2    0.67    0.33
  12   8  -2    0.77    0.34
 -12   8  -2    0.70    0.28
  12   8   2    0.05    0.23
 -12   0  -3    7.35    0.26
  12   0  -3    7.78    0.32
 -12   0  -3    7.31    0.46
 -12   0   3    8.10    0.38
  12   0   3    8.94    0.37
  12   0   3    7.98    0.49
  12  -1   3  109.78    3.86
 -12  -1  -3  101.10    3.25
 -12   1   3  103.48    3.38
  12   1  -3  101.06    3.42
 -12  -1  -3  104.99    3.19
  12  -1   3  105.73    3.25
 -12  -1  -3   99.59    3.82
 -12  -1   3  105.63    3.38
  12   1   3  106.34    3.38
 -12   1  -3  100.59    3.82
  12   1   3  110.55    3.86
  12   1   3  106.80    3.28
 -12   1  -3  104.94    3.38
  12  -2   3    1.76    0.25
 -12   2   3    1.44    0.18
  12   2  -3    1.38    0.20
  12  -2   3    1.66    0.14
 -12  -2  -3    1.66    0.23
  12   2   3    1.69    0.18
  12   2   3    1.55    0.18
 -12  -2   3    1.66    0.13
 -12   2  -3    2.03    0.19
  12   3  -3   48.25    1.73
  12   3  -3   45.27    1.72
 -12   3   3   45.64    1.66
 -12  -3  -3   47.27    1.92
 -12   3  -3   47.63    1.66
  12   3   3   43.41    1.63
 -12  -3   3   48.41    1.53
  12   3   3   47.04    1.66
 -12  -4  -3    5.83    0.47
  12   4  -3    5.89    0.44
  12   4  -3    5.10    0.41
 -12   4   3    5.45    0.40
 -12   4  -3    5.80    0.39
 -12   4  -3    6.04    0.23
  12   4   3    5.53    0.40
  12   4   3    5.09    0.35
 -12   5   3   29.74    1.23
  12   5  -3   29.87    1.30
  12   5  -3   29.01    1.22
  12   5  -3   29.16    1.26
 -12  -5  -3   27.54    1.37
  12   5   3   30.49    1.25
 -12   5  -3   30.34    0.96
 -12   5  -3   26.13    1.17
  12   6  -3    2.66    0.35
  12   6  -3    1.80    0.33
  12   6  -3    2.30    0.36
 -12   6   3    2.82    0.35
 -12   6  -3    2.17    0.32
  12   6   3    1.91    0.32
  12   7  -3    1.31    0.34
  12   7  -3    1.20    0.33
 -12   7   3    1.16    0.30
  12   7  -3    0.84    0.27
 -12   7  -3    1.40    0.29
  12   7   3    1.06    0.30
 -12   0  -4   74.68    2.24
 -12   0  -4   69.92    2.72
 -12   0   4   72.70    2.42
  12   0   4   70.04    2.30
  12   0  -4   62.02    2.49
  12   0   4   79.53    2.78
 -12  -1  -4    3.93    0.35
  12   1  -4    4.07    0.33
 -12  -1  -4    4.63    0.24
 -12   1   4    4.84    0.29
 -12  -1  -4    4.82    0.26
 -12   1  -4    4.22    0.36
 -12   1  -4    4.68    0.29
  12   1   4    4.96    0.34
 -12  -1   4    5.07    0.29
  12   1   4    5.21    0.32
 -12   1  -4    4.87    0.20
  12   2  -4   79.60    2.78
 -12  -2  -4   78.82    3.10
 -12   2   4   81.05    2.69
 -12   2  -4   79.85    2.48
 -12   2  -4   80.94    2.56
  12   2   4   81.07    2.77
 -12  -2   4   84.70    2.67
 -12   2  -4   79.77    2.67
  12   2   4   83.20    2.67
 -12  -3  -4   13.71    0.81
  12   3  -4   15.07    0.76
 -12   3   4   14.27    0.67
  12   3  -4   15.65    0.74
 -12  -3   4   14.74    0.58
  12   3   4   15.25    0.71
  12   3   4   14.29    0.71
 -12   3  -4   14.30    0.52
 -12   3  -4   15.49    0.53
 -12  -3   4   15.22    0.57
 -12   3  -4   15.46    0.60
 -12   3  -4   15.16    0.66
  12   4  -4   32.53    1.29
 -12   4   4   31.23    1.23
 -12  -4  -4   28.96    1.41
  12   4  -4   30.29    1.30
  12   4   4   29.72    1.24
 -12   4  -4   32.04    1.15
  12   4   4   28.16    1.21
 -12   4  -4   31.15    1.01
 -12   4  -4   31.51    1.20
 -12  -5  -4    0.33    0.19
  12   5  -4    0.27    0.18
  12   5  -4    0.18    0.14
 -12   5   4    0.28    0.15
  12   5  -4    0.23    0.16
 -12   5  -4    0.23    0.09
 -12   5  -4    0.25    0.14
  12   5   4    0.04    0.15
  12   6  -4    7.49    0.61
 -12   6   4    8.64    0.59
  12   6  -4    8.53    0.62
  12   6  -4    8.62    0.60
 -12   6  -4    8.23    0.55
  12   6   4    8.14    0.60
  12   7  -4    0.63    0.25
  12   7  -4    0.49    0.28
  12   7  -4    0.57    0.29
 -12   7   4    0.52    0.24
 -12   7  -4    0.52    0.24
  12   7   4    0.47    0.26
 -12   0   5    7.31    0.44
 -12   0  -5    8.90    0.35
  12   0  -5    8.12    0.34
  12   0   5    7.23    0.43
 -12   0  -5    7.98    0.54
 -12   1   5   65.83    2.34
  12   1  -5   63.20    2.33
 -12   1   5   68.33    2.20
 -12  -1  -5   63.67    2.60
  12   1   5   64.76    2.22
 -12   1  -5   63.95    2.59
 -12   1  -5   70.99    2.11
 -12   1  -5   68.17    2.11
 -12  -1   5   66.18    2.27
  12   1   5   63.87    2.35
  12   2  -5    9.02    0.57
 -12  -2  -5    9.23    0.63
 -12   2   5   10.78    0.50
 -12   2  -5   10.04    0.41
 -12   2  -5   10.21    0.42
 -12   2  -5    9.80    0.47
  12   2   5    9.74    0.56
 -12  -2   5   10.64    0.49
  12   2   5    9.46    0.54
 -12   2  -5    8.89    0.60
 -12   3   5   29.71    1.13
  12   3  -5   29.98    1.22
  12   3  -5   28.43    1.24
 -12  -3  -5   29.21    1.38
 -12   3  -5   27.56    0.97
 -12   3  -5   29.45    1.09
 -12  -3   5   27.40    1.05
  12   3   5   25.81    1.15
 -12   3  -5   29.30    1.03
  12   3   5   28.25    1.19
  12   4  -5    2.96    0.37
  12   4  -5    2.96    0.34
 -12   4   5    3.35    0.31
 -12  -4  -5    3.04    0.40
 -12   4  -5    2.85    0.28
 -12   4  -5    2.87    0.26
  12   4   5    2.77    0.32
 -12   4  -5    3.12    0.21
  12   4   5    3.34    0.35
  12   5  -5   10.02    0.69
  12   5  -5   10.89    0.68
 -12  -5  -5   10.81    0.76
 -12   5   5   10.55    0.62
  12   5   5   10.84    0.65
 -12   5  -5   10.39    0.45
  12   5   5   10.24    0.66
 -12   5  -5   11.18    0.59
 -12   5  -5    9.96    0.58
  12   6  -5    0.40    0.21
 -12   6   5    0.22    0.20
  12   6  -5    0.63    0.27
  12   6  -5    0.26    0.23
 -12   6  -5    0.35    0.20
  12   6   5    0.37    0.23
  12   7  -5    0.92    0.30
  12   7  -5    0.98    0.33
  12   7  -5    0.75    0.32
 -12   7   5    0.81    0.27
 -12   7  -5    0.99    0.27
  12   7   5    1.25    0.35
 -12   0   6   48.59    1.84
 -12   0  -6   54.32    1.68
  12   0  -6   49.12    1.78
  12   0   6   50.05    1.79
 -12   0  -6   46.74    2.07
  12   1  -6    4.25    0.39
 -12   1   6    5.12    0.39
 -12  -1  -6    4.66    0.43
 -12   1   6    4.54    0.28
  12   1   6    4.71    0.40
  12   1   6    4.67    0.38
 -12   1  -6    5.17    0.44
 -12  -1   6    4.80    0.35
 -12   1  -6    5.68    0.28
  12  -1  -6    4.65    0.31
 -12   2   6   29.19    1.06
  12   2  -6   24.52    1.18
 -12   2   6   28.17    1.22
 -12  -2  -6   26.74    1.34
 -12   2  -6   28.17    0.99
  12   2   6   29.89    1.18
 -12   2  -6   27.28    1.31
 -12  -2   6   27.01    1.08
  12   2   6   27.84    1.20
 -12   2  -6   28.00    1.02
  12   3  -6    0.86    0.23
 -12   3   6    0.89    0.18
 -12  -3  -6    0.67    0.23
 -12   3  -6    0.87    0.15
 -12  -3   6    0.68    0.15
 -12   3  -6    0.69    0.15
  12   3   6    0.86    0.21
  12   3   6    1.00    0.23
 -12   3  -6    0.61    0.12
  12   4  -6   19.71    0.96
 -12   4   6   19.67    0.88
  12   4  -6   16.49    0.96
 -12  -4  -6   19.03    1.10
 -12   4  -6   19.85    0.82
  12   4   6   19.24    0.96
 -12   4  -6   18.99    0.73
 -12   4  -6   20.01    0.83
  12   4   6   17.57    0.94
 -12   5   6    6.10    0.45
  12   5  -6    5.21    0.53
  12   5  -6    5.09    0.48
 -12   5  -6    5.07    0.40
  12   5   6    4.67    0.48
  12   5   6    5.20    0.49
 -12   5  -6    5.35    0.32
  12   6  -6    3.87    0.46
  12   6  -6    3.55    0.46
 -12   6   6    3.87    0.42
  12   6  -6    5.53    0.58
  12   6   6    4.53    0.52
 -12   0  -7    8.94    0.63
  12   0   7    8.24    0.57
 -12   0   7    8.39    0.53
 -12   0  -7    8.23    0.43
 -12  -1  -7   34.21    1.57
  12   1  -7   31.30    1.39
 -12   1   7   33.01    1.39
  12   1   7   32.20    1.42
 -12   1  -7   35.66    1.57
  12   1   7   32.92    1.35
 -12  -1   7   31.83    1.32
 -12   2   7    2.75    0.35
  12   2  -7    2.95    0.37
 -12  -2  -7    3.21    0.42
  12   2   7    3.45    0.38
 -12   2  -7    3.10    0.40
  12   2   7    3.23    0.37
 -12  -2   7    3.18    0.31
  12   3  -7   18.18    0.98
 -12  -3  -7   19.39    1.11
  12   3   7   20.90    0.99
 -12  -3   7   18.53    0.84
 -12   3  -7   19.52    0.77
  12   3   7   16.94    0.96
  12   4  -7    1.43    0.28
  12   4  -7    1.29    0.30
  12   4   7    1.62    0.33
  12   4   7    1.02    0.29
 -12   4  -7    1.25    0.19
  12   5  -7    6.62    0.56
  12   5  -7    5.34    0.59
  12   5   7    7.48    0.60
  12   5   7    7.61    0.60
  12   6  -7    0.00    0.23
  12   6  -7    0.25    0.28
  12   6  -7    0.16    0.22
  12   6   7    0.27    0.27
 -12   0   8   13.72    0.77
  12   0   8   13.63    0.82
 -12   0  -8   14.70    0.89
  12   0  -8   12.75    0.77
  12  -1   8    0.50    0.23
  12   1  -8    0.94    0.26
 -12  -1  -8    0.73    0.26
 -12   1   8    0.61    0.22
 -12  -1   8    0.84    0.21
 -12   1  -8    0.75    0.25
  12   1   8    0.80    0.25
 -12   2   8   16.50    0.92
 -12  -2  -8   17.16    1.04
  12   2  -8   16.55    0.94
 -12  -2   8   16.89    0.82
  12   2   8   16.72    0.90
 -12   2  -8   16.89    0.99
  12   2   8   15.82    0.92
  12   3  -8    3.37    0.43
 -12   3  -8    2.98    0.28
  12   3   8    3.85    0.45
  12   3   8    3.30    0.43
 -12  -3   8    3.05    0.33
  12   4  -8    9.94    0.68
  12   4  -8    8.72    0.70
  12   4   8    8.84    0.68
 -12   4  -8    9.78    0.49
  12   4   8    7.54    0.66
  12   5  -8    0.70    0.30
  12   5  -8    1.53    0.35
  12   5   8    1.19    0.35
  12   5   8    0.94    0.32
  12   0   9    1.96    0.37
  12   0  -9    1.76    0.33
 -12   0   9    2.87    0.38
 -12   1   9   14.37    0.85
  12  -1   9   13.85    0.88
  12   1  -9   12.89    0.84
 -12  -1   9   14.46    0.80
  12   1   9   13.84    0.89
 -12   2   9    3.55    0.45
  12  -2   9    3.17    0.45
  12   2  -9    3.95    0.46
  12   2   9    3.19    0.45
 -12  -2   9    3.46    0.38
  12   3  -9    7.21    0.64
  12   3   9    6.78    0.63
  12   3   9    7.14    0.62
 -12   3  -9    8.05    0.48
  12   4  -9    1.41    0.38
  12   4  -9    1.55    0.35
  12   4   9    1.66    0.40
  12   4   9    1.13    0.35
 -12   0  10    8.33    0.65
  12   0  10    7.61    0.68
  12   0 -10    8.10    0.66
  12   1 -10    1.77    0.38
 -12   1  10    1.78    0.36
  12  -1  10    1.68    0.39
  12   1  10    1.25    0.36
 -12  -1  10    1.17    0.30
  12  -1 -10    1.40    0.35
 -13   0   0    0.17    0.07
  13   0   0    0.15    0.06
 -13   0   0    0.20    0.07
  13   1   0    1.34    0.15
 -13   1   0    1.62    0.17
  13  -1   0    1.54    0.17
  13   1   0    1.70    0.14
  13   1   0    1.72    0.16
 -13  -1   0    1.61    0.15
  13   2   0    1.46    0.18
 -13   2   0    1.00    0.15
  13  -2   0    1.29    0.17
  13   2   0    1.52    0.16
 -13  -2   0    1.26    0.16
  13   2   0    1.57    0.15
 -13   3   0   25.36    1.02
  13   3   0   24.79    1.00
 -13  -3   0   26.25    1.09
  13   3   0   27.18    0.98
  13   4   0   11.03    0.63
 -13   4   0   11.41    0.61
  13   4   0   12.44    0.60
  13   4   0   12.44    0.63
 -13   5   0   13.28    0.70
  13   5   0   13.04    0.74
  13   5   0   12.49    0.68
  13   5   0   13.41    0.72
  13   6   0    0.10    0.16
  13   6   0    0.02    0.18
 -13   6   0    0.14    0.16
  13   6   0    0.15    0.16
  13   7   0   21.93    1.17
  13   7   0   20.55    1.12
  13   7   0   20.60    1.07
 -13   7   0   21.42    1.09
  13   8   0    0.11    0.25
 -13   8   0    0.24    0.25
  13   0   1    0.05    0.05
  13   0  -1    0.00    0.05
 -13   0  -1    0.02    0.05
  13   0   1    0.03    0.07
  13   0   1    0.05    0.03
 -13   0   1    0.06    0.06
 -13   0  -1    0.01    0.06
 -13  -1  -1   34.83    1.14
  13  -1   1   35.11    1.38
 -13  -1  -1   32.80    1.34
 -13   1   1   34.11    1.23
  13   1  -1   34.51    1.21
  13   1  -1   35.52    1.29
  13   1   1   33.05    1.14
  13   1   1   33.99    1.11
  13   1   1   33.70    1.21
  13   1   1   35.82    1.37
  13  -1  -1   34.50    1.32
 -13   1  -1   34.88    1.37
 -13  -1   1   33.08    1.28
 -13  -2  -1   39.47    1.59
  13   2  -1   39.97    1.47
  13  -2   1   39.45    1.61
  13   2  -1   40.61    1.44
  13  -2   1   42.96    1.35
 -13   2   1   40.06    1.45
  13   2   1   40.89    1.46
  13   2   1   40.12    1.36
  13   2   1   40.34    1.39
 -13  -2   1   41.09    1.52
 -13   2  -1   40.44    1.45
  13   2   1   42.61    1.37
  13   3  -1    1.33    0.19
 -13  -3  -1    1.47    0.20
  13   3  -1    1.37    0.21
 -13   3   1    1.34    0.19
 -13  -3   1    1.48    0.17
  13   3   1    1.14    0.19
 -13   3  -1    1.38    0.19
  13   3   1    1.56    0.18
  13   3   1    1.71    0.19
  13   3   1    1.39    0.12
  13   4  -1   34.87    1.38
 -13   4   1   36.02    1.38
  13   4  -1   36.14    1.33
  13   4  -1   36.82    1.42
  13   4   1   35.85    1.33
  13   4   1   34.46    1.36
 -13   4  -1   35.19    1.36
  13   4   1   34.57    1.42
  13   5  -1    0.08    0.13
  13   5  -1    0.09    0.14
 -13   5   1    0.22    0.14
  13   5  -1    0.15    0.13
  13   5   1    0.31    0.16
 -13   5  -1    0.13    0.14
  13   5   1    0.43    0.20
  13   5   1   -0.04    0.12
 -13   6   1   52.68    2.06
  13   6  -1   54.56    2.04
  13   6  -1   53.70    2.13
  13   6   1   54.99    2.16
 -13   6  -1   54.36    2.07
  13   6   1   54.22    2.04
  13   7  -1    0.09    0.23
  13   7  -1   -0.02    0.18
 -13   7   1    0.33    0.21
  13   7  -1    0.01    0.21
  13   7   1    0.22    0.21
 -13   7  -1    0.16    0.20
  13   8  -1   26.95    1.34
 -13   8   1   28.87    1.38
  13   8  -1   27.68    1.44
 -13   8  -1   27.11    1.35
  13   8   1   25.39    1.33
 -13   0  -2    0.02    0.07
  13   0   2    0.03    0.05
 -13   0   2    0.02    0.06
  13   0   2    0.09    0.08
  13   0   2    0.05    0.06
  13   0  -2    0.09    0.05
  13   1  -2    5.34    0.33
  13  -1   2    6.26    0.25
  13  -1   2    6.43    0.26
  13  -1   2    6.26    0.40
 -13   1   2    6.00    0.34
 -13  -1  -2    5.98    0.25
 -13  -1  -2    5.07    0.36
  13   1   2    6.41    0.40
  13   1   2    6.31    0.29
 -13   1  -2    5.24    0.37
 -13   1  -2    5.65    0.33
  13   1   2    5.94    0.33
  13   2  -2   14.96    0.68
  13   2  -2   15.91    0.68
 -13  -2  -2   14.42    0.73
  13  -2   2   14.76    0.74
 -13   2   2   14.55    0.65
  13  -2   2   15.50    0.54
  13  -2   2   14.27    0.50
 -13  -2   2   14.73    0.59
  13   2   2   15.68    0.61
  13   2   2   14.58    0.61
  13   2   2   15.13    0.67
 -13   2  -2   14.59    0.64
  13   3  -2   10.76    0.59
  13   3  -2   10.65    0.58
 -13   3   2   11.79    0.58
 -13  -3  -2   10.89    0.64
 -13   3  -2   10.81    0.56
  13   3   2   12.73    0.52
 -13  -3   2   12.44    0.54
  13   3   2   12.77    0.57
  13   3   2   13.13    0.64
  13   4  -2    1.86    0.26
 -13   4   2    2.16    0.26
 -13  -4  -2    2.24    0.29
  13   4  -2    2.46    0.29
  13   4  -2    2.52    0.27
  13   4   2    2.46    0.27
 -13   4  -2    2.18    0.25
  13   4   2    2.33    0.30
 -13   5   2   21.50    1.02
  13   5  -2   24.55    1.10
  13   5  -2   24.27    1.03
  13   5  -2   22.44    1.07
  13   5   2   24.17    1.12
 -13   5  -2   22.95    1.02
  13   5   2   22.68    1.03
 -13   6   2    6.18    0.49
  13   6  -2    6.65    0.54
  13   6  -2    6.76    0.51
  13   6  -2    6.86    0.56
  13   6   2    6.68    0.52
 -13   6  -2    6.94    0.51
  13   7  -2   27.34    1.34
 -13   7   2   25.15    1.24
  13   7  -2   28.75    1.35
  13   7  -2   27.84    1.28
 -13   7  -2   24.20    1.21
  13   7   2   24.96    1.25
  13   8  -2    0.86    0.37
 -13   8   2    1.32    0.35
  13   8  -2    1.28    0.35
  13   8  -2    1.27    0.38
  13   8   2    1.74    0.37
 -13   8  -2    1.04    0.32
 -13   0   3    0.02    0.07
  13   0   3    0.03    0.07
  13   0   3   -0.13    0.08
 -13   0  -3    0.00    0.07
  13   0  -3    0.02    0.04
 -13   1   3    5.64    0.32
 -13  -1  -3    5.21    0.24
  13  -1   3    5.18    0.28
  13   1  -3    5.20    0.34
 -13  -1  -3    4.81    0.37
  13  -1   3    5.63    0.41
 -13   1  -3    5.03    0.31
  13   1   3    5.94    0.31
  13   1   3    5.63    0.41
 -13   1  -3    5.24    0.38
  13   1   3    5.11    0.32
 -13  -2  -3   28.72    1.27
 -13   2   3   27.23    1.08
 -13  -2  -3   29.48    0.98
  13  -2   3   30.86    0.96
  13   2  -3   29.10    1.14
 -13  -2   3   28.29    0.98
  13   2   3   28.32    1.06
 -13   2  -3   27.30    1.07
  13   2   3   28.22    1.08
  13   2   3   28.83    1.12
 -13  -3  -3    8.84    0.57
  13   3  -3    8.76    0.51
  13   3  -3    8.26    0.51
 -13   3   3    8.61    0.48
 -13  -3   3    8.85    0.40
  13   3   3    8.54    0.48
  13   3   3    8.76    0.46
 -13  -3   3    9.21    0.33
 -13   3  -3    8.45    0.47
 -13   4   3   23.66    1.00
 -13  -4  -3   22.66    1.13
  13   4  -3   22.46    1.04
  13   4  -3   23.65    1.04
  13   4   3   24.06    0.94
 -13   4  -3   22.40    0.97
  13   4   3   23.28    0.99
  13   5  -3    0.20    0.17
  13   5  -3    0.57    0.19
  13   5  -3    0.53    0.21
 -13  -5  -3    0.18    0.16
 -13   5   3    0.19    0.14
 -13   5  -3    0.32    0.15
  13   5   3    0.25    0.16
 -13  -6  -3   39.64    1.84
  13   6  -3   40.28    1.64
 -13   6   3   38.20    1.63
  13   6  -3   41.13    1.70
  13   6  -3   42.30    1.74
  13   6   3   41.13    1.66
 -13   6  -3   39.72    1.61
  13   7  -3    2.07    0.39
 -13   7   3    3.04    0.40
  13   7  -3    2.62    0.40
  13   7  -3    2.76    0.42
  13   7   3    2.64    0.40
 -13   7  -3    2.71    0.38
 -13   0  -4    0.06    0.04
  13   0   4    0.08    0.08
  13   0  -4   -0.11    0.04
 -13   0  -4    0.13    0.11
 -13   0   4    0.02    0.08
 -13  -1  -4    1.97    0.16
  13   1  -4    1.61    0.22
 -13  -1  -4    1.64    0.24
  13  -1   4    1.99    0.20
 -13   1   4    1.97    0.19
 -13  -1  -4    1.66    0.14
 -13   1  -4    1.78    0.25
 -13  -1   4    1.87    0.17
 -13   1  -4    2.09    0.19
 -13   1  -4    1.57    0.09
  13   1   4    1.83    0.21
 -13  -2  -4    3.09    0.34
 -13   2   4    2.84    0.25
  13   2  -4    2.85    0.30
 -13   2  -4    2.91    0.17
  13   2   4    2.65    0.26
 -13   2  -4    3.39    0.26
  13   2   4    3.01    0.27
 -13  -2   4    2.91    0.21
 -13   3   4    4.95    0.35
 -13  -3  -4    4.45    0.41
  13   3  -4    4.70    0.38
  13   3  -4    4.18    0.37
 -13   3  -4    4.98    0.27
  13   3   4    4.63    0.37
  13   3   4    5.42    0.37
 -13   3  -4    4.27    0.32
 -13  -3   4    5.13    0.26
  13   4  -4    5.39    0.44
 -13   4   4    5.11    0.38
  13   4  -4    5.79    0.44
 -13  -4  -4    4.93    0.46
 -13   4  -4    5.43    0.38
  13   4   4    4.68    0.40
  13   4   4    6.03    0.41
 -13   5   4   20.26    0.97
  13   5  -4   22.74    1.04
  13   5  -4   20.97    1.06
 -13  -5  -4   20.10    1.12
  13   5  -4   22.13    1.02
 -13   5  -4   21.54    0.96
  13   5   4   20.62    1.00
  13   6  -4    3.15    0.42
  13   6  -4    3.15    0.39
  13   6  -4    2.77    0.40
 -13   6   4    3.31    0.38
  13   6   4    2.81    0.39
 -13   6  -4    2.72    0.34
  13   7  -4   24.20    1.22
 -13   7   4   24.46    1.20
  13   7  -4   25.71    1.33
  13   7  -4   24.69    1.25
  13   7   4   23.13    1.23
 -13   7  -4   24.10    1.16
 -13   0   5    0.01    0.09
  13   0   5    0.17    0.12
 -13   0  -5   -0.05    0.10
 -13   0  -5    0.03    0.05
 -13   1   5    5.51    0.32
  13   1  -5    4.79    0.38
 -13   1   5    4.66    0.36
 -13  -1  -5    5.31    0.44
 -13   1  -5    5.16    0.23
 -13   1  -5    5.72    0.45
 -13  -1   5    5.11    0.34
  13   1   5    5.64    0.38
  13   1   5    4.98    0.38
  13   2  -5   11.72    0.66
 -13  -2  -5   10.32    0.70
 -13   2   5   12.25    0.57
  13   2   5   12.57    0.63
 -13   2  -5   12.08    0.56
 -13   2  -5   11.77    0.45
  13   2   5   12.67    0.65
 -13   2  -5   11.87    0.72
 -13  -2   5   12.74    0.55
 -13   2  -5   12.46    0.47
  13   3  -5    2.02    0.28
 -13   3   5    1.93    0.23
  13   3  -5    1.90    0.29
 -13  -3  -5    1.26    0.27
  13   3   5    1.70    0.25
  13   3   5    2.19    0.28
 -13   3  -5    2.10    0.19
 -13   3  -5    2.00    0.22
 -13   3  -5    2.08    0.15
 -13  -3   5    2.23    0.20
 -13   4   5   16.29    0.78
  13   4  -5   15.07    0.82
 -13  -4  -5   16.11    0.96
  13   4  -5   16.42    0.88
 -13   4  -5   16.91    0.76
  13   4   5   16.53    0.82
 -13   4  -5   16.07    0.70
  13   4   5   16.72    0.84
 -13   4  -5   16.11    0.58
 -13   5   5    1.76    0.27
  13   5  -5    2.46    0.36
  13   5  -5    2.24    0.34
  13   5   5    1.69    0.30
 -13   5  -5    2.46    0.28
  13   5   5    1.57    0.27
  13   6  -5   26.87    1.35
 -13   6   5   26.45    1.22
  13   6  -5   28.59    1.31
  13   6  -5   26.58    1.27
  13   6   5   24.66    1.25
 -13   6  -5   27.99    1.20
  13   7  -5    0.73    0.33
 -13   7   5    0.73    0.28
  13   7  -5    0.71    0.31
  13   7  -5    0.25    0.24
  13   7   5    0.43    0.26
 -13   7  -5    0.49    0.23
  13   0   6    0.28    0.14
 -13   0  -6    0.13    0.15
 -13   0  -6    0.13    0.07
 -13   0   6    0.10    0.12
  13   1  -6    2.76    0.32
 -13   1   6    3.56    0.34
 -13   1   6    3.19    0.24
 -13  -1  -6    3.78    0.39
  13   1   6    3.86    0.34
 -13  -1   6    3.67    0.31
  13  -1  -6    3.05    0.24
 -13   1  -6    3.57    0.21
 -13   1  -6    3.72    0.37
  13   1   6    3.51    0.35
  13   2  -6    0.73    0.21
 -13  -2  -6    1.14    0.26
 -13   2   6    0.80    0.16
 -13   2  -6    0.63    0.13
  13   2   6    0.86    0.21
  13   2   6    1.44    0.24
 -13   2  -6    0.83    0.22
 -13  -2   6    0.94    0.17
 -13   2  -6    0.90    0.13
 -13   3   6    5.27    0.37
  13   3  -6    5.14    0.45
 -13  -3  -6    4.57    0.47
 -13  -3   6    4.67    0.33
 -13   3  -6    5.17    0.34
  13   3   6    4.36    0.42
  13   3   6    4.85    0.42
 -13   3  -6    5.30    0.28
  13   4  -6    2.36    0.34
 -13   4   6    2.98    0.31
 -13  -4  -6    2.35    0.39
  13   4  -6    2.47    0.37
 -13   4  -6    2.30    0.26
  13   4   6    2.17    0.33
 -13   4  -6    2.41    0.20
  13   4   6    2.75    0.35
  13   5  -6   11.26    0.79
  13   5  -6   12.27    0.75
 -13   5   6   12.02    0.68
  13   5   6   12.71    0.75
 -13   5  -6   10.83    0.62
  13   5   6   10.87    0.74
  13   6  -6    1.73    0.40
  13   6  -6    1.25    0.33
  13   6  -6    1.21    0.32
 -13   6   6    1.73    0.32
  13   6   6    2.37    0.39
  13   0   7   -0.11    0.12
 -13   0   7    0.11    0.12
  13   0  -7   -0.03    0.11
 -13   0  -7   -0.07    0.14
 -13  -1  -7    4.15    0.46
  13   1  -7    3.96    0.41
 -13   1   7    3.74    0.39
  13   1   7    3.51    0.37
  13   1   7    4.34    0.42
 -13  -1   7    4.23    0.36
 -13   1  -7    4.17    0.43
 -13   2   7    2.70    0.34
  13   2  -7    2.10    0.33
 -13  -2  -7    1.64    0.33
 -13  -2   7    2.43    0.27
  13   2   7    2.87    0.34
 -13   2  -7    2.39    0.35
  13   2   7    2.46    0.34
 -13  -3  -7    2.44    0.41
  13   3  -7    2.24    0.35
  13   3   7    3.17    0.38
  13   3   7    2.28    0.34
 -13  -3   7    2.48    0.28
 -13   3  -7    2.88    0.23
  13   4  -7   15.47    0.93
  13   4  -7   16.18    0.88
  13   4   7   14.61    0.85
 -13   4  -7   14.96    0.62
  13   4   7   14.14    0.86
  13   5  -7    0.63    0.28
  13   5  -7    0.42    0.26
  13   5   7    0.38    0.25
  13   5   7    0.25    0.24
  13   0   8    0.16    0.18
 -13   0   8    0.10    0.15
  13   0  -8    0.21    0.17
 -13   0  -8    0.29    0.20
 -13  -1  -8    0.48    0.25
  13   1  -8    0.37    0.21
 -13   1   8    0.45    0.21
  13  -1   8    0.36    0.20
  13   1   8    0.57    0.24
 -13  -1   8    0.30    0.17
 -13   1  -8    0.29    0.23
  13   2  -8    2.91    0.40
 -13   2   8    2.86    0.39
  13   2   8    3.41    0.43
 -13   2  -8    2.50    0.40
 -13  -2   8    3.22    0.34
  13   2   8    2.92    0.39
  13   3  -8    8.17    0.64
  13   3   8    8.31    0.64
 -13   3  -8    8.21    0.44
  13   3   8    7.63    0.60
  13   4  -8    2.19    0.40
  13   4  -8    2.54    0.39
  13   4   8    1.90    0.37
  13   4   8    2.32    0.40
  13   5  -8    6.45    0.65
  13   5  -8    5.63    0.57
  13   5   8    5.70    0.60
  13   5   8    6.25    0.62
  13   0  -9    0.07    0.17
  13   0   9   -0.10    0.16
 -13   0   9   -0.02    0.18
  13   1  -9    1.49    0.33
 -13   1   9    1.56    0.31
  13  -1   9    1.46    0.34
 -13  -1   9    1.21    0.28
  13   1   9    1.35    0.33
 -13   2   9    1.14    0.30
  13   2  -9    1.16    0.31
  13  -2   9    0.55    0.27
  13   2   9    0.72    0.28
 -13  -2   9    0.40    0.23
  13   3  -9    0.87    0.31
  13   3   9    0.96    0.32
 -13   3  -9    1.44    0.22
  13   3   9    1.06    0.32
  13   0 -10   -0.07    0.21
 -13   0  10    0.14    0.23
  13   0  10   -0.08    0.20
 -13   1  10    0.48    0.27
  13  -1  10    0.40    0.28
  13   1 -10    0.92    0.32
 -13  -1  10    0.68    0.27
  13  -1 -10    0.40    0.26
  13   1  10    0.67    0.31
 -14   0   0  310.12    9.73
  14   0   0  316.61   10.80
 -14   0   0  306.60   10.79
  14   0   0  314.57    9.59
  14   1   0   19.98    0.75
 -14  -1   0   20.52    0.85
  14   1   0   21.28    0.86
  14  -1   0   20.70    0.88
 -14   1   0   20.57    0.82
  14   1   0   19.56    0.79
  14   2   0   65.42    2.16
  14  -2   0   65.77    2.43
  14   2   0   63.77    2.21
 -14   2   0   64.02    2.21
 -14  -2   0   66.39    2.40
  14   3   0    0.15    0.10
 -14   3   0    0.05    0.09
 -14  -3   0   -0.10    0.07
  14   3   0    0.12    0.09
  14   3   0    0.00    0.08
  14   4   0   79.03    2.81
  14   4   0   80.21    2.77
 -14   4   0   81.48    2.78
  14   4   0   82.17    2.69
  14   5   0   29.59    1.28
  14   5   0   27.00    1.21
 -14   5   0   28.01    1.21
  14   5   0   29.51    1.19
  14   6   0    9.04    0.63
  14   6   0    9.22    0.66
  14   6   0    9.13    0.61
 -14   6   0    9.17    0.61
  14   7   0    0.28    0.22
  14   7   0    0.17    0.20
 -14   7   0    0.38    0.21
  14   7   0    0.06    0.21
  14   8   0   -0.49    0.20
 -14   8   0    0.12    0.22
 -14   0  -1   21.04    0.84
  14   0   1   21.66    0.79
  14   0   1   22.14    0.93
 -14   0   1   21.43    0.84
  14   0  -1   20.38    0.79
  14   0  -1   21.86    0.86
  14   0   1   21.82    0.71
 -14   0  -1   20.06    0.91
 -14  -1  -1   80.51    2.46
  14   1  -1   78.40    2.77
  14  -1   1   81.48    2.87
 -14  -1  -1   72.35    2.82
  14   1  -1   76.95    2.53
 -14   1   1   76.44    2.57
  14  -1  -1   77.20    2.80
  14   1   1   76.99    2.39
  14   1   1   79.79    2.86
  14   1   1   79.80    2.46
  14   1   1   75.99    2.54
 -14   1  -1   73.75    2.85
 -14  -1   1   75.05    2.76
 -14   1  -1   78.87    2.58
  14  -2   1    6.35    0.41
  14   2  -1    6.20    0.38
  14  -2   1    6.49    0.30
 -14  -2  -1    6.53    0.40
 -14   2   1    5.57    0.36
  14   2  -1    6.85    0.37
  14   2   1    6.75    0.34
  14   2   1    6.10    0.37
 -14  -2   1    6.07    0.33
  14   2   1    6.27    0.32
  14   2   1    6.22    0.29
 -14   2  -1    6.61    0.38
  14   3  -1   61.79    2.10
 -14   3   1   61.47    2.11
  14   3  -1   60.53    2.13
 -14  -3  -1   62.00    2.32
 -14   3  -1   60.05    2.10
 -14  -3   1   61.19    2.24
  14   3   1   59.43    2.13
  14   3   1   59.24    2.01
  14   3   1   58.82    1.97
  14   3   1   59.12    2.05
  14   4  -1    2.56    0.29
  14   4  -1    2.51    0.27
 -14   4   1    2.20    0.26
  14   4  -1    2.89    0.31
 -14  -4  -1    2.48    0.28
 -14   4  -1    2.33    0.26
  14   4   1    2.36    0.26
  14   4   1    1.91    0.25
  14   4   1    1.91    0.28
  14   5  -1   13.38    0.75
  14   5  -1   13.00    0.73
 -14   5   1   12.96    0.71
  14   5  -1   13.37    0.70
 -14   5  -1   13.86    0.72
  14   5   1   12.86    0.72
  14   5   1   13.12    0.77
  14   5   1   14.96    0.73
  14   6  -1    1.89    0.33
 -14   6   1    1.81    0.30
  14   6  -1    2.19    0.32
  14   6  -1    2.33    0.37
  14   6   1    1.85    0.30
  14   6   1    2.13    0.36
 -14   6  -1    1.86    0.30
  14   7  -1    1.19    0.33
 -14   7   1    0.78    0.26
  14   7  -1    0.67    0.25
  14   7  -1    1.21    0.31
  14   7   1    1.00    0.29
 -14   7  -1    1.70    0.31
  14   8  -1    0.83    0.31
  14   8  -1    1.16    0.39
 -14   8   1    0.85    0.29
  14   8   1    0.80    0.33
 -14   8  -1    0.99    0.33
  14   0   2  235.03    7.86
 -14   0   2  220.66    7.00
  14   0  -2  227.62    7.70
  14   0   2  221.66    6.70
  14   0   2  225.54    6.93
 -14   0  -2  205.77    7.81
 -14  -1  -2    0.64    0.08
  14   1  -2    0.49    0.12
  14  -1   2    0.56    0.08
 -14  -1  -2    0.58    0.14
  14  -1   2    0.75    0.08
 -14   1   2    0.82    0.14
  14  -1   2    1.14    0.19
 -14   1  -2    0.65    0.15
  14   1   2    0.62    0.15
  14   1   2    1.26    0.12
  14   1   2    0.51    0.12
  14  -1  -2    0.69    0.11
 -14   1  -2    0.88    0.14
 -14  -2  -2   62.13    2.37
  14   2  -2   63.46    2.15
  14  -2   2   59.40    1.94
  14  -2   2   61.30    2.37
  14  -2   2   64.13    1.96
 -14   2   2   59.65    2.10
  14   2  -2   62.87    2.13
  14   2   2   62.04    2.07
 -14   2  -2   63.77    2.12
  14   2   2   60.97    2.01
 -14  -2   2   60.81    2.19
  14   2   2   59.57    2.12
 -14  -3  -2    5.72    0.44
 -14   3   2    6.62    0.41
  14   3  -2    6.74    0.42
  14   3  -2    6.06    0.41
  14   3   2    6.69    0.39
  14   3   2    6.72    0.34
 -14   3  -2    6.01    0.39
 -14  -3   2    6.25    0.34
  14   3   2    6.30    0.43
  14   4  -2   58.38    2.04
 -14   4   2   59.97    2.10
  14   4  -2   59.20    2.14
 -14  -4  -2   56.34    2.32
  14   4  -2   58.30    2.12
  14   4   2   57.22    2.15
 -14   4  -2   58.77    2.08
  14   4   2   58.79    2.04
  14   5  -2    0.31    0.17
 -14  -5  -2    0.11    0.15
  14   5  -2   -0.09    0.12
 -14   5   2    0.03    0.12
  14   5  -2    0.40    0.18
  14   5   2    0.26    0.19
 -14   5  -2    0.06    0.11
  14   5   2    0.08    0.13
  14   6  -2    5.97    0.51
  14   6  -2    6.02    0.49
  14   6  -2    5.27    0.52
 -14   6   2    5.62    0.47
 -14   6  -2    5.35    0.46
  14   6   2    5.22    0.46
 -14   7   2    1.74    0.33
  14   7  -2    1.73    0.38
  14   7  -2    2.11    0.40
  14   7  -2    2.07    0.36
 -14   7  -2    1.94    0.34
  14   7   2    1.95    0.36
  14   0   3   17.73    0.67
  14   0  -3   18.32    0.69
  14   0   3   18.69    0.69
 -14   0   3   17.78    0.73
 -14   0  -3   16.66    0.85
  14   0   3   18.89    0.90
  14  -1   3  102.96    3.78
 -14   1   3  100.10    3.32
  14   1  -3  101.08    3.35
  14  -1   3  102.91    3.16
 -14  -1  -3  100.50    3.75
 -14  -1  -3  100.82    3.17
  14   1   3  100.66    3.20
  14   1   3  110.87    3.81
 -14   1  -3   99.61    3.32
  14   1   3  104.43    3.31
 -14   1  -3   96.69    3.75
  14  -2   3   13.10    0.44
 -14  -2  -3   11.02    0.65
 -14   2   3   11.13    0.55
  14   2  -3   11.80    0.60
 -14  -2  -3   11.17    0.46
  14   2   3   11.83    0.55
  14   2   3   11.77    0.54
  14   2   3   11.74    0.58
 -14   2  -3   11.32    0.55
  14   3  -3   53.94    1.93
 -14  -3  -3   54.02    2.15
 -14   3   3   52.39    1.87
  14   3  -3   51.94    1.92
  14   3   3   52.64    1.85
 -14   3  -3   52.94    1.86
 -14  -3   3   53.41    1.90
  14   3   3   50.59    1.83
  14   3   3   51.94    1.93
 -14  -4  -3   15.11    0.86
  14   4  -3   15.57    0.81
 -14   4   3   16.42    0.77
  14   4  -3   17.17    0.82
  14   4   3   16.39    0.77
  14   4   3   15.02    0.69
 -14   4  -3   14.92    0.73
  14   5  -3    8.40    0.59
 -14   5   3    8.85    0.56
  14   5  -3    8.99    0.57
  14   5  -3    9.28    0.61
 -14  -5  -3    7.96    0.61
  14   5   3    8.64    0.57
 -14   5  -3    8.33    0.53
 -14  -6  -3    4.02    0.48
 -14   6   3    4.14    0.43
  14   6  -3    4.85    0.46
  14   6  -3    5.23    0.51
  14   6  -3    4.67    0.49
  14   6   3    4.90    0.47
 -14   6  -3    5.29    0.45
  14   7  -3    3.49    0.45
  14   7  -3    4.45    0.53
  14   7  -3    4.38    0.52
 -14   7   3    3.18    0.41
 -14   7  -3    4.26    0.46
  14   7   3    3.88    0.47
 -14   0  -4   85.87    3.31
 -14   0  -4   86.91    2.65
  14   0   4   89.53    2.80
 -14  -1  -4    2.94    0.32
 -14  -1  -4    3.61    0.20
 -14   1   4    4.27    0.29
  14  -1   4    4.28    0.28
  14   1  -4    3.99    0.32
 -14   1  -4    3.92    0.35
 -14  -1   4    4.27    0.26
  14   1   4    3.85    0.29
 -14   1  -4    4.61    0.29
  14   2  -4   60.69    2.14
 -14   2   4   58.47    2.04
 -14  -2  -4   58.63    2.37
 -14   2  -4   60.49    2.04
 -14  -2   4   60.52    1.98
  14   2   4   59.24    2.10
  14   2   4   56.84    2.01
  14   3  -4    7.62    0.50
 -14  -3  -4    8.00    0.57
  14   3  -4    7.13    0.50
 -14   3   4    7.47    0.45
  14   3   4    8.03    0.46
 -14  -3   4    7.72    0.34
  14   3   4    7.61    0.47
 -14   3  -4    7.03    0.43
 -14   4   4   22.88    0.98
 -14  -4  -4   20.77    1.14
  14   4  -4   23.74    1.05
  14   4  -4   20.48    1.03
  14   4   4   22.14    0.99
 -14   4  -4   22.28    0.95
  14   4   4   23.32    0.97
  14   5  -4    7.99    0.56
 -14   5   4    8.32    0.53
  14   5  -4    8.33    0.57
  14   5  -4    7.03    0.56
 -14  -5  -4    7.76    0.62
  14   5   4    8.10    0.50
 -14   5  -4    7.37    0.50
  14   5   4    7.68    0.55
  14   6  -4    3.17    0.44
 -14   6   4    3.92    0.41
  14   6  -4    4.00    0.44
  14   6  -4    3.60    0.44
 -14   6  -4    3.74    0.40
  14   6   4    3.03    0.40
  14   7  -4    2.29    0.43
  14   7  -4    1.66    0.34
  14   7  -4    1.43    0.37
 -14   7   4    2.36    0.36
 -14   7  -4    2.06    0.34
  14   7   4    2.81    0.45
  14   0   5   18.85    0.79
 -14   0  -5   17.69    0.96
 -14   0  -5   19.78    0.65
 -14   0   5   18.76    0.82
 -14  -1  -5   50.76    2.24
 -14   1   5   55.34    1.90
  14   1  -5   53.97    2.02
  14   1   5   54.82    1.92
 -14   1  -5   54.76    2.26
 -14  -1   5   56.97    1.94
 -14   1  -5   59.32    1.75
  14   1   5   56.11    2.04
 -14   2   5    6.39    0.39
  14   2  -5    6.89    0.48
 -14  -2  -5    6.28    0.50
 -14   2  -5    6.00    0.49
 -14   2  -5    6.51    0.28
 -14   2  -5    7.19    0.39
  14   2   5    5.61    0.40
 -14  -2   5    6.19    0.35
 -14   2  -5    6.50    0.25
  14   2   5    5.77    0.42
 -14  -3  -5   33.91    1.54
  14   3  -5   34.29    1.37
 -14   3   5   32.22    1.26
  14   3  -5   31.97    1.37
  14   3   5   31.06    1.31
 -14  -3   5   31.18    1.16
  14   3   5   31.58    1.30
 -14   3  -5   32.74    1.13
 -14   3  -5   32.47    1.23
 -14   4   5    8.18    0.50
  14   4  -5    7.89    0.55
 -14  -4  -5    7.19    0.59
  14   4  -5    6.44    0.53
  14   4   5    7.58    0.51
 -14   4  -5    7.60    0.41
 -14   4  -5    7.60    0.46
  14   4   5    7.05    0.51
  14   5  -5    9.14    0.64
  14   5  -5    9.17    0.66
 -14   5   5    9.37    0.59
  14   5   5    9.08    0.63
 -14   5  -5    9.78    0.57
  14   5   5    8.99    0.58
  14   6  -5    3.49    0.47
 -14   6   5    2.70    0.36
  14   6  -5    3.37    0.44
  14   6  -5    3.14    0.41
 -14   6  -5    3.53    0.38
  14   6   5    2.79    0.40
  14   7  -5    1.72    0.44
 -14   7   5    2.17    0.38
  14   7  -5    1.54    0.39
  14   7  -5    1.35    0.35
  14   7   5    1.44    0.35
 -14   7  -5    1.40    0.31
 -14   0  -6   39.81    1.82
  14   0   6   41.79    1.55
 -14   0   6   40.86    1.59
 -14   0  -6   44.41    1.40
 -14   1   6    3.15    0.32
  14   1  -6    2.44    0.31
 -14  -1  -6    2.38    0.34
 -14   1   6    3.23    0.25
 -14   1  -6    2.75    0.35
  14  -1  -6    2.56    0.21
 -14  -1   6    3.10    0.28
  14   1   6    3.06    0.32
  14   1   6    3.27    0.35
 -14   2   6   42.37    1.50
 -14  -2  -6   43.13    1.87
  14   2  -6   40.35    1.66
 -14   2  -6   42.37    1.83
  14   2   6   40.25    1.64
 -14  -2   6   39.72    1.51
 -14   2  -6   41.49    1.35
  14   2   6   40.06    1.57
 -14   2  -6   41.56    1.46
  14   3  -6    7.40    0.56
 -14  -3  -6    8.53    0.66
 -14   3   6    8.52    0.49
  14   3   6    7.82    0.56
  14   3   6    8.81    0.57
 -14  -3   6    7.93    0.45
 -14   3  -6    9.00    0.48
 -14   3  -6    8.74    0.36
  14   4  -6   13.51    0.78
 -14  -4  -6   11.73    0.85
  14   4  -6   12.91    0.81
 -14   4   6   14.61    0.72
 -14   4  -6   12.96    0.65
  14   4   6   13.63    0.77
  14   4   6   12.81    0.77
  14   5  -6    0.24    0.22
  14   5  -6    0.44    0.23
 -14   5   6   -0.04    0.15
 -14   5  -6   -0.02    0.15
  14   5   6    0.21    0.20
  14   5   6    0.34    0.21
  14   6  -6    1.38    0.38
  14   6  -6    1.62    0.34
 -14   6   6    1.86    0.32
  14   6  -6    2.15    0.39
  14   6   6    1.63    0.35
 -14   0  -7    0.82    0.25
 -14   0   7    0.84    0.21
  14   0  -7    1.73    0.28
  14   0   7    1.11    0.26
 -14  -1  -7   20.62    1.10
 -14   1   7   19.43    0.95
  14   1  -7   17.27    0.94
 -14  -1   7   19.12    0.89
  14   1   7   18.42    0.96
 -14   1  -7   20.06    1.08
  14   1   7   20.04    0.93
 -14  -2  -7    2.45    0.38
  14   2  -7    1.71    0.30
  14   2   7    1.44    0.28
 -14   2  -7    1.73    0.31
  14   2   7    2.00    0.31
 -14  -2   7    1.43    0.22
  14   3  -7   20.27    1.06
 -14   3  -7   21.43    0.75
  14   3   7   18.39    1.01
  14   3   7   19.10    0.99
  14   4  -7    0.08    0.20
  14   4  -7    0.21    0.20
  14   4   7    0.00    0.19
  14   4   7    0.38    0.23
  14   5  -7    6.90    0.63
  14   5  -7    7.14    0.60
  14   5   7    6.15    0.60
  14   5   7    6.96    0.59
  14   0   8   11.58    0.76
 -14   0   8   12.62    0.72
  14   0  -8   12.02    0.75
 -14   0  -8   13.06    0.86
  14   1  -8    1.99    0.33
 -14  -1  -8    2.43    0.40
  14  -1   8    2.45    0.37
 -14   1   8    2.19    0.33
  14   1   8    2.06    0.34
 -14  -1   8    2.14    0.30
 -14   1  -8    1.98    0.36
  14   2  -8   22.90    1.16
  14   2   8   23.27    1.11
 -14  -2   8   22.36    1.03
 -14   2  -8   23.12    1.24
  14   2   8   22.51    1.16
  14   3  -8    1.43    0.33
 -14   3  -8    2.04    0.21
  14   3   8    1.78    0.35
  14   3   8    2.27    0.37
  14   4  -8    4.74    0.56
  14   4  -8    5.33    0.54
  14   4   8    5.37    0.56
  14   4   8    5.22    0.56
 -14   0   9    2.99    0.38
  14   0  -9    2.46    0.38
  14   0   9    2.54    0.42
  14  -1   9   10.55    0.78
 -14   1   9   10.04    0.71
  14   1  -9    9.72    0.72
  14   1   9   10.68    0.77
 -14  -1   9   11.70    0.71
  14   2  -9    0.31    0.25
  14  -2   9    0.39    0.26
  14   2   9    0.62    0.28
 -14  -2   9    0.51    0.24
  14   3  -9    9.50    0.75
  14   3   9    8.76    0.72
  14   3   9    8.89    0.72
 -14   0  10    5.20    0.53
  14   0 -10    4.13    0.52
  14   0  10    5.25    0.59
 -14   1  10    0.50    0.25
  14  -1  10    0.69    0.30
  14   1 -10    0.16    0.24
  14   1  10    0.47    0.29
 -14  -1  10    0.28    0.24
  14  -1 -10    0.24    0.23
 -15  -1   0    0.88    0.13
  15   1   0    0.98    0.12
  15   1   0    0.83    0.13
  15   1   0    0.89    0.14
 -15   1   0    0.82    0.14
  15  -1   0    0.83    0.15
 -15   2   0    3.17    0.26
  15   2   0    3.49    0.24
  15   2   0    3.13    0.26
  15  -2   0    3.44    0.28
 -15  -2   0    2.71    0.23
  15   3   0   40.10    1.46
 -15  -3   0   40.96    1.60
  15   3   0   41.13    1.41
 -15   3   0   38.20    1.48
  15   4   0    5.06    0.40
 -15   4   0    4.02    0.34
  15   4   0    4.46    0.35
  15   4   0    3.69    0.32
 -15  -4   0    4.18    0.35
 -15   5   0   30.01    1.26
  15   5   0   31.63    1.34
  15   5   0   29.61    1.23
  15   5   0   28.94    1.27
 -15   6   0   28.01    1.27
  15   6   0   26.97    1.32
  15   6   0   29.99    1.27
  15   6   0   27.87    1.29
  15   7   0   19.34    1.09
  15   7   0   19.21    1.03
 -15   7   0   19.15    1.03
  15   7   0   20.77    1.14
 -15   8   0    0.67    0.29
  15   8   0    0.79    0.31
  15   0   1    0.04    0.08
  15   0  -1    0.04    0.06
  15   0   1    0.07    0.06
 -15   0   1    0.12    0.08
 -15   0  -1    0.07    0.07
  15   0   1    0.06    0.04
 -15   0  -1    0.03    0.07
  15   0  -1    0.07    0.06
  15   1  -1   12.82    0.56
  15  -1   1   13.25    0.65
 -15  -1  -1   12.04    0.61
 -15   1   1   13.06    0.59
  15   1  -1   12.93    0.55
 -15  -1  -1   13.19    0.49
 -15   1  -1   12.86    0.59
  15   1   1   12.82    0.49
 -15  -1   1   12.46    0.56
 -15   1  -1   12.35    0.63
  15   1   1   12.65    0.47
  15  -1  -1   13.30    0.60
  15   1   1   12.13    0.55
  15   1   1   13.45    0.65
  15   2  -1   23.88    1.00
  15  -2   1   25.76    0.88
  15   2  -1   24.97    0.97
 -15  -2  -1   24.13    1.07
 -15   2   1   23.77    0.98
  15  -2   1   25.53    1.10
  15   2   1   27.23    0.89
  15   2   1   24.99    0.92
  15   2   1   26.07    0.90
  15   2   1   25.78    1.00
 -15  -2   1   24.25    0.99
 -15   2  -1   24.16    0.98
  15   3  -1    7.25    0.44
 -15  -3  -1    8.41    0.50
  15   3  -1    7.85    0.47
 -15   3   1    7.78    0.46
  15   3   1    7.14    0.32
  15   3   1    7.97    0.42
  15   3   1    7.08    0.41
 -15  -3   1    7.97    0.43
 -15   3  -1    8.67    0.47
  15   4  -1   25.50    1.06
 -15  -4  -1   23.57    1.12
 -15   4   1   23.62    1.03
  15   4  -1   24.13    1.07
  15   4  -1   25.21    1.00
 -15   4  -1   23.31    1.02
  15   4   1   25.40    1.01
  15   4   1   24.11    1.09
  15   4   1   23.65    1.02
 -15  -4   1   25.16    1.06
  15   5  -1    4.21    0.38
 -15   5   1    4.03    0.37
  15   5  -1    5.03    0.44
  15   5  -1    4.91    0.43
 -15  -5  -1    5.05    0.43
 -15   5  -1    4.53    0.38
  15   5   1    3.96    0.42
  15   5   1    3.84    0.38
  15   5   1    3.81    0.37
 -15   6   1   15.75    0.87
  15   6  -1   17.40    0.93
  15   6  -1   17.26    0.88
  15   6  -1   15.43    0.91
  15   6   1   16.44    0.95
  15   6   1   16.72    0.87
 -15   6  -1   16.56    0.87
  15   7  -1   12.04    0.78
  15   7  -1   12.63    0.83
 -15   7   1   11.89    0.77
  15   7  -1   12.17    0.85
 -15   7  -1   12.97    0.79
  15   7   1   12.07    0.79
 -15   0   2    0.10    0.07
  15   0   2    0.06    0.05
  15   0  -2    0.07    0.06
  15   0   2   -0.04    0.06
  15   0   2    0.00    0.09
 -15   0  -2    0.06    0.09
  15   1  -2    1.22    0.17
  15  -1   2    1.70    0.13
  15  -1   2    1.40    0.21
 -15  -1  -2    1.31    0.11
 -15  -1  -2    1.25    0.19
 -15   1   2    1.29    0.17
  15  -1   2    1.54    0.11
  15   1   2    1.73    0.18
  15  -1  -2    1.30    0.15
  15   1   2    1.53    0.14
 -15   1  -2    1.07    0.18
 -15   1  -2    1.30    0.18
  15   1   2    1.29    0.20
  15  -2   2    1.01    0.09
  15   2  -2    0.92    0.17
 -15   2   2    1.31    0.18
  15  -2   2    1.11    0.10
 -15  -2  -2    0.74    0.17
  15  -2   2    1.29    0.21
  15   2  -2    0.90    0.17
  15   2   2    1.07    0.18
  15   2   2    1.21    0.14
 -15   2  -2    0.92    0.16
  15   2   2    1.23    0.15
 -15  -2   2    0.96    0.11
  15   2   2    0.91    0.14
 -15   3   2   37.00    1.43
  15   3  -2   39.22    1.48
 -15  -3  -2   37.76    1.60
  15   3  -2   38.30    1.45
 -15  -3   2   38.23    1.44
  15   3   2   37.86    1.47
  15   3   2   38.70    1.34
 -15   3  -2   37.02    1.42
  15   3   2   38.65    1.38
  15   4  -2    9.92    0.55
  15   4  -2    9.51    0.58
 -15   4   2    8.98    0.54
  15   4  -2   10.05    0.60
 -15  -4  -2    9.71    0.62
 -15   4  -2   10.40    0.56
  15   4   2   10.01    0.55
  15   4   2    9.67    0.61
 -15  -4   2    9.76    0.51
  15   5  -2   30.07    1.32
 -15  -5  -2   30.01    1.41
 -15   5   2   30.34    1.29
  15   5  -2   31.61    1.34
  15   5  -2   31.56    1.27
  15   5   2   30.72    1.37
  15   5   2   30.22    1.27
 -15   5  -2   29.98    1.27
 -15  -6  -2    5.46    0.51
  15   6  -2    5.80    0.49
 -15   6   2    6.03    0.50
  15   6  -2    6.72    0.56
  15   6  -2    6.47    0.54
 -15   6  -2    5.60    0.47
  15   6   2    6.29    0.50
  15   7  -2   15.44    0.97
  15   7  -2   16.99    1.01
 -15   7   2   16.27    0.93
  15   7  -2   16.57    0.94
  15   7   2   17.08    0.97
 -15   7  -2   17.35    0.94
 -15   0  -3   -0.01    0.08
  15   0  -3    0.00    0.04
 -15   0   3   -0.04    0.06
  15   0   3    0.21    0.09
  15   0   3    0.04    0.11
  15   0   3    0.03    0.07
  15  -1   3    6.89    0.34
 -15  -1  -3    6.72    0.46
 -15  -1  -3    7.15    0.28
  15   1  -3    7.07    0.42
 -15   1   3    6.73    0.39
 -15   1  -3    7.15    0.40
  15   1   3    6.95    0.39
  15   1   3    7.16    0.49
 -15   1  -3    6.77    0.47
  15   1   3    6.83    0.36
 -15  -2  -3    5.49    0.42
  15  -2   3    6.46    0.24
  15   2  -3    6.00    0.40
 -15   2   3    5.86    0.37
  15   2   3    5.27    0.34
  15   2   3    5.91    0.39
 -15   2  -3    5.36    0.36
  15   2   3    5.81    0.36
  15   3  -3    5.05    0.39
  15   3  -3    5.21    0.40
 -15  -3  -3    4.71    0.41
 -15   3   3    4.74    0.35
 -15  -3   3    5.11    0.26
  15   3   3    4.76    0.33
  15   3   3    4.67    0.40
  15   3   3    5.13    0.36
 -15   3  -3    4.96    0.35
  15   4  -3   23.73    1.10
  15   4  -3   26.83    1.13
 -15  -4  -3   24.71    1.22
 -15   4   3   23.32    1.05
  15   4   3   25.64    1.06
 -15   4  -3   25.22    1.05
  15   4   3   25.06    0.99
 -15  -4   3   25.13    1.01
 -15  -5  -3    4.08    0.44
  15   5  -3    4.79    0.46
  15   5  -3    4.88    0.42
  15   5  -3    3.31    0.40
 -15   5   3    4.02    0.38
  15   5   3    4.40    0.42
 -15   5  -3    4.57    0.38
  15   6  -3   12.68    0.76
  15   6  -3   12.33    0.78
  15   6  -3   12.60    0.80
 -15   6   3   12.64    0.75
  15   6   3   11.82    0.75
 -15   6  -3   12.89    0.73
  15   7  -3    6.66    0.64
 -15   7   3    6.93    0.58
  15   7  -3    6.30    0.56
  15   7  -3    6.08    0.62
  15   7   3    6.78    0.58
 -15   7  -3    6.66    0.54
 -15   0  -4    0.06    0.10
  15   0   4    0.00    0.08
 -15   1   4    0.80    0.14
 -15  -1  -4    0.36    0.07
  15  -1   4    0.45    0.12
  15   1  -4    0.58    0.16
 -15  -1  -4    0.63    0.18
 -15   1  -4    0.48    0.16
 -15   1  -4    0.52    0.13
  15   1   4    0.45    0.13
  15   2  -4   12.64    0.67
 -15   2   4   12.48    0.60
 -15  -2  -4   10.71    0.69
  15   2   4   14.18    0.64
 -15   2  -4   11.87    0.58
  15   2   4   12.63    0.61
 -15  -2   4   12.10    0.50
  15   3  -4   25.32    1.10
  15   3  -4   24.92    1.08
 -15  -3  -4   22.91    1.18
 -15   3   4   23.52    1.01
  15   3   4   25.01    1.02
  15   3   4   24.73    1.02
 -15  -3   4   25.11    0.85
 -15   3  -4   23.17    0.98
 -15  -4  -4    0.04    0.14
  15   4  -4   -0.02    0.13
  15   4  -4    0.15    0.14
 -15   4   4   -0.08    0.12
  15   4   4    0.26    0.14
  15   4   4    0.36    0.17
 -15   4  -4   -0.03    0.10
 -15   5   4   21.87    1.01
 -15  -5  -4   21.85    1.18
  15   5  -4   21.05    1.08
  15   5  -4   21.55    1.03
  15   5  -4   21.18    1.06
 -15   5  -4   21.55    0.98
  15   5   4   21.36    0.95
  15   5   4   21.33    1.03
  15   6  -4    8.05    0.59
  15   6  -4    7.35    0.61
 -15   6   4    7.03    0.54
  15   6  -4    7.38    0.61
  15   6   4    6.15    0.54
 -15   6  -4    7.19    0.53
  15   7  -4   12.27    0.83
  15   7  -4   15.42    0.94
 -15   7   4   13.69    0.84
 -15   7  -4   13.21    0.81
  15   7   4   14.29    0.91
  15   0   5   -0.02    0.10
 -15   0   5   -0.01    0.09
 -15   0  -5    0.03    0.11
 -15   1   5    2.98    0.24
 -15  -1  -5    2.78    0.34
  15   1  -5    2.19    0.28
  15   1   5    3.19    0.32
 -15  -1   5    2.65    0.24
 -15   1  -5    2.47    0.32
  15   1   5    2.57    0.27
  15   2  -5    2.99    0.34
 -15  -2  -5    3.85    0.39
 -15   2   5    3.63    0.29
  15   2   5    3.28    0.32
 -15   2  -5    4.06    0.30
  15   2   5    3.79    0.33
 -15   2  -5    4.19    0.40
 -15  -2   5    4.01    0.27
  15   3  -5    3.80    0.38
 -15   3   5    3.73    0.32
  15   3  -5    3.14    0.37
 -15  -3  -5    3.97    0.44
 -15  -3   5    3.92    0.26
  15   3   5    3.56    0.35
  15   3   5    4.01    0.36
 -15   3  -5    3.94    0.31
  15   4  -5   18.00    0.89
  15   4  -5   16.25    0.89
 -15   4   5   16.77    0.80
 -15  -4  -5   15.06    0.95
 -15   4  -5   15.76    0.76
  15   4   5   15.07    0.82
  15   4   5   15.48    0.80
  15   5  -5    4.24    0.47
  15   5  -5    4.86    0.49
 -15   5   5    4.35    0.41
 -15   5  -5    4.40    0.39
  15   5   5    4.07    0.45
  15   5   5    4.35    0.42
 -15   6   5   11.38    0.72
  15   6  -5   10.95    0.80
  15   6  -5   12.03    0.78
  15   6  -5   12.39    0.80
  15   6   5   10.73    0.75
 -15   6  -5   10.97    0.68
 -15   0  -6    0.07    0.13
  15   0   6    0.27    0.15
 -15   0   6   -0.07    0.09
  15   1  -6    0.87    0.21
 -15   1   6    0.93    0.15
 -15  -1  -6    1.29    0.27
  15   1   6    0.97    0.21
 -15   1  -6    0.98    0.24
 -15  -1   6    1.49    0.21
  15   1   6    1.22    0.24
  15   2  -6    7.95    0.56
 -15   2   6    7.96    0.45
 -15  -2  -6    8.64    0.64
 -15   2  -6    8.38    0.44
  15   2   6    8.24    0.55
 -15  -2   6    8.51    0.46
 -15   2  -6    7.52    0.59
 -15   2  -6    7.89    0.32
  15   2   6    8.19    0.53
 -15  -3  -6    9.25    0.69
 -15   3   6    9.66    0.53
  15   3  -6    8.45    0.61
 -15   3  -6    8.74    0.49
  15   3   6    9.05    0.60
  15   3   6    8.68    0.59
  15   4  -6    6.02    0.50
  15   4  -6    5.33    0.52
 -15   4   6    6.02    0.44
  15   4   6    5.03    0.48
  15   4   6    5.72    0.49
 -15   4  -6    5.44    0.40
  15   5  -6   12.84    0.85
  15   5  -6   12.69    0.80
 -15   5   6   12.93    0.73
  15   5   6   13.73    0.82
 -15   5  -6   12.50    0.69
  15   5   6   13.08    0.78
  15   6  -6    0.08    0.27
  15   6  -6   -0.16    0.22
  15   6  -6   -0.01    0.20
 -15   6   6    0.47    0.24
  15   6   6    0.33    0.26
  15   0  -7    0.02    0.12
 -15   0   7    0.01    0.12
 -15   0  -7    0.10    0.15
  15   0   7    0.25    0.17
  15   1  -7    2.56    0.35
 -15   1   7    3.48    0.36
 -15  -1  -7    2.84    0.40
 -15   1  -7    3.27    0.41
 -15  -1   7    4.24    0.35
  15   1   7    2.55    0.36
  15   1   7    3.32    0.37
  15   2  -7    3.13    0.38
 -15  -2  -7    3.76    0.47
 -15  -2   7    3.27    0.31
  15   2   7    2.85    0.35
  15   2   7    1.98    0.32
 -15   2  -7    2.85    0.40
 -15   2  -7    3.20    0.21
  15   3  -7    4.11    0.46
  15   3   7    4.37    0.46
  15   3   7    4.47    0.45
  15   4  -7   12.83    0.78
  15   4  -7   10.08    0.76
  15   4   7   11.72    0.76
  15   4   7   11.59    0.75
  15   5  -7    5.02    0.52
  15   5  -7    3.74    0.51
  15   5   7    4.02    0.49
  15   5   7    3.87    0.48
  15   0  -8    0.13    0.16
 -15   0  -8    0.07    0.20
  15   0   8    0.09    0.18
 -15   0   8    0.11    0.16
 -15   1   8    1.48    0.29
  15  -1   8    1.75    0.34
  15   1  -8    1.83    0.33
 -15  -1   8    2.42    0.31
 -15   1  -8    2.29    0.38
  15   1   8    2.20    0.35
  15   2  -8    0.30    0.20
  15   2   8    0.81    0.27
  15   2   8    0.33    0.23
 -15  -2   8    0.76    0.21
  15   3  -8    2.84    0.42
  15   3   8    2.59    0.39
  15   3   8    2.31    0.39
  15   4  -8    1.29    0.33
  15   4  -8    1.32    0.36
  15   4   8    1.34    0.35
  15   4   8    1.41    0.36
 -15   0   9    0.26    0.21
  15   0  -9    0.07    0.20
  15   0   9   -0.09    0.19
 -15   1   9    1.66    0.33
  15  -1   9    1.87    0.38
  15   1  -9    2.97    0.43
  15   1   9    2.56    0.41
 -15  -1   9    1.69    0.31
  15  -2   9    2.47    0.42
  15   2  -9    1.48    0.35
  15   2   9    1.96    0.38
  15   3  -9    1.38    0.36
  15   3   9    0.83    0.32
  15   3   9    0.53    0.29
  16   0   0   89.87    2.81
 -16   0   0   87.31    2.93
  16   0   0   89.62    3.21
 -16   0   0   86.62    3.20
  16   1   0   95.44    3.26
  16  -1   0  103.44    3.63
 -16  -1   0   98.38    3.59
 -16   1   0   98.43    3.30
  16   1   0  104.08    3.61
  16   1   0  100.58    3.19
  16   2   0   93.86    3.07
 -16   2   0   91.97    3.14
  16  -2   0   96.67    3.47
  16   2   0   94.55    3.14
  16   2   0   97.79    3.02
 -16  -2   0   92.07    3.41
  16   3   0    7.93    0.43
 -16   3   0    8.62    0.49
 -16  -3   0    8.79    0.49
  16   3   0    8.19    0.50
  16   3   0    8.32    0.46
  16   4   0   15.80    0.71
 -16  -4   0   15.08    0.76
  16   4   0   14.27    0.76
  16   4   0   14.27    0.72
  16   5   0   20.78    0.98
  16   5   0   20.67    1.03
 -16   5   0   19.42    0.96
 -16  -5   0   21.99    1.03
  16   5   0   21.14    0.96
 -16   6   0    6.08    0.49
  16   6   0    5.11    0.50
  16   6   0    5.69    0.55
  16   6   0    5.60    0.47
  16   7   0    0.40    0.28
 -16   7   0    0.15    0.18
  16   7   0    0.00    0.18
  16   7   0   -0.11    0.19
  16   0   1   77.74    2.73
  16   0  -1   71.86    2.37
 -16   0  -1   68.47    2.69
 -16   0  -1   69.49    2.44
  16   0   1   73.23    2.28
  16   0   1   73.17    2.38
  16   0  -1   72.30    2.63
 -16   0   1   73.89    2.44
 -16   1   1   74.08    2.52
  16  -1   1   76.06    2.81
  16   1  -1   75.93    2.70
 -16  -1  -1   77.07    2.39
 -16  -1  -1   69.48    2.76
  16   1  -1   74.64    2.46
  16   1   1   74.74    2.49
  16  -1  -1   75.91    2.74
  16   1   1   74.02    2.39
  16   1   1   78.32    2.80
  16   1   1   75.76    2.32
 -16  -1   1   74.06    2.69
 -16   1  -1   73.39    2.53
  16  -2   1   41.75    1.67
  16   2  -1   39.95    1.51
 -16  -2  -1   40.35    1.63
  16   2  -1   41.23    1.47
  16  -2   1   42.39    1.37
 -16   2   1   40.62    1.50
  16   2   1   43.00    1.39
  16  -2  -1   41.86    1.62
  16   2   1   40.74    1.50
 -16  -2   1   40.09    1.55
  16   2   1   39.03    1.41
  16   2   1   40.02    1.38
 -16   2  -1   42.17    1.51
 -16  -3  -1   36.08    1.47
  16   3  -1   35.66    1.33
  16   3  -1   36.04    1.37
 -16   3   1   33.34    1.33
 -16  -3   1   35.30    1.38
 -16   3  -1   35.16    1.35
  16   3   1   35.14    1.37
  16   3   1   34.56    1.26
  16   3   1   33.27    1.28
  16   3   1   34.15    1.17
  16   4  -1    9.73    0.60
  16   4  -1   10.07    0.55
  16   4  -1    9.56    0.57
 -16  -4  -1    9.11    0.58
 -16   4  -1   10.47    0.58
  16   4   1   10.40    0.62
  16   4   1   10.53    0.55
 -16  -4   1    9.78    0.55
  16   4   1    9.74    0.55
 -16   5   1    0.84    0.21
  16   5  -1    1.28    0.27
  16   5  -1    0.87    0.21
  16   5  -1    0.90    0.23
 -16  -5  -1    1.07    0.23
 -16   5  -1    1.06    0.23
  16   5   1    0.87    0.22
  16   5   1    0.84    0.22
  16   5   1    0.49    0.22
  16   6  -1    5.86    0.48
 -16  -6  -1    6.38    0.52
 -16   6   1    5.45    0.47
  16   6  -1    5.65    0.50
  16   6  -1    5.03    0.51
  16   6   1    5.23    0.53
 -16   6  -1    5.56    0.47
  16   6   1    6.26    0.51
  16   7  -1    0.42    0.23
 -16   7   1    0.32    0.20
  16   7  -1    0.24    0.23
  16   7  -1    0.11    0.24
 -16   7  -1    0.25    0.20
  16   7   1    0.23    0.21
  16   0   2   64.95    2.04
 -16   0   2   63.00    2.22
  16   0   2   62.49    2.15
  16   0  -2   71.98    2.38
  16   0   2   68.12    2.53
 -16   0  -2   63.43    2.49
 -16  -1  -2   50.89    1.57
  16  -1   2   48.16    1.59
  16  -1   2   47.48    1.52
  16   1  -2   48.27    1.71
 -16  -1  -2   46.68    1.91
  16  -1   2   52.00    1.96
 -16   1   2   46.13    1.71
  16   1   2   46.57    1.57
  16   1   2   52.48    1.96
  16   1   2   48.30    1.69
  16  -1  -2   50.36    1.83
 -16   1  -2   50.23    1.74
 -16   1  -2   47.18    1.93
 -16  -2  -2   58.22    2.38
  16   2  -2   62.55    2.15
  16  -2   2   65.32    1.97
 -16   2   2   61.94    2.15
  16  -2   2   60.52    1.97
  16   2  -2   60.66    2.17
 -16   2  -2   62.33    2.15
 -16  -2   2   61.10    2.22
  16   2   2   64.20    2.10
  16   2   2   61.41    2.03
  16   2   2   62.30    2.04
  16   2   2   62.84    2.16
 -16  -3  -2   48.40    1.96
  16   3  -2   48.27    1.76
 -16   3   2   45.79    1.74
  16   3  -2   50.52    1.81
  16   3   2   47.59    1.69
  16   3   2   47.64    1.65
 -16  -3   2   48.64    1.79
 -16   3  -2   48.99    1.75
  16   3   2   48.52    1.68
  16   3   2   46.72    1.78
  16   4  -2    9.12    0.57
  16   4  -2    9.48    0.59
  16   4  -2   10.14    0.55
 -16   4   2    9.49    0.57
 -16  -4  -2    9.83    0.63
  16   4   2    9.97    0.62
 -16   4  -2    9.46    0.55
  16   4   2    9.79    0.45
 -16  -4   2    9.38    0.50
  16   4   2    9.31    0.54
  16   5  -2    0.93    0.23
 -16   5   2    0.65    0.20
 -16  -5  -2    0.67    0.21
  16   5  -2    0.43    0.20
  16   5  -2    0.70    0.20
 -16   5  -2    0.78    0.21
  16   5   2    0.69    0.25
  16   5   2    0.34    0.18
 -16  -6  -2    0.98    0.27
  16   6  -2    0.94    0.28
 -16   6   2    1.78    0.30
  16   6  -2    1.58    0.33
  16   6  -2    1.21    0.26
  16   6   2    1.10    0.26
 -16   6  -2    1.34    0.28
  16   7  -2    5.86    0.60
  16   7  -2    6.14    0.62
  16   7  -2    5.13    0.54
 -16   7   2    6.27    0.55
  16   7   2    5.31    0.55
 -16   7  -2    6.20    0.53
  16   0   3    9.23    0.41
  16   0  -3    9.32    0.40
 -16   0  -3    9.16    0.56
  16   0   3    9.76    0.43
 -16  -1  -3   64.57    2.01
 -16   1   3   63.48    2.18
 -16  -1  -3   61.10    2.47
  16   1  -3   62.32    2.21
  16  -1   3   64.98    2.04
  16  -1   3   64.10    2.03
  16  -1  -3   64.04    2.32
  16   1   3   66.15    2.17
 -16   1  -3   61.96    2.18
  16   1   3   64.62    2.08
 -16   1  -3   63.05    2.49
 -16   2   3   39.94    1.47
 -16  -2  -3   37.36    1.66
  16   2  -3   38.62    1.50
  16   2   3   42.48    1.46
  16   2   3   38.93    1.40
 -16   2  -3   40.42    1.47
  16   2   3   40.80    1.49
 -16  -3  -3   38.86    1.72
  16   3  -3   38.66    1.56
 -16   3   3   39.88    1.52
  16   3  -3   41.02    1.57
 -16  -3   3   41.75    1.47
  16   3   3   43.02    1.48
  16   3   3   38.71    1.46
 -16   3  -3   38.87    1.49
  16   3   3   41.14    1.57
 -16   4   3   12.48    0.66
  16   4  -3   13.06    0.71
 -16  -4  -3   11.44    0.73
  16   4  -3   12.11    0.69
  16   4   3   12.25    0.65
 -16   4  -3   12.96    0.66
  16   4   3   10.93    0.56
 -16  -4   3   11.76    0.55
  16   5  -3    7.24    0.57
 -16  -5  -3    7.45    0.58
  16   5  -3    8.12    0.54
 -16   5   3    7.38    0.52
  16   5  -3    6.86    0.55
 -16   5  -3    7.94    0.52
  16   5   3    7.23    0.53
 -16   6   3    3.21    0.39
  16   6  -3    3.73    0.45
  16   6  -3    3.21    0.39
  16   6  -3    3.40    0.44
  16   6   3    3.43    0.40
 -16   6  -3    3.07    0.38
  16   7  -3    0.48    0.28
 -16   7   3    0.05    0.18
  16   7  -3   -0.05    0.25
  16   7  -3    0.16    0.22
 -16   7  -3    0.04    0.19
  16   7   3   -0.02    0.19
  16   0   4   64.92    2.14
 -16   0  -4   65.38    2.57
  16   1  -4   36.96    1.47
 -16  -1  -4   38.49    1.66
  16  -1   4   39.55    1.35
 -16   1   4   39.36    1.42
 -16  -1  -4   38.62    1.24
  16   1   4   38.89    1.37
 -16   1  -4   38.80    1.66
 -16   1  -4   38.03    1.40
  16   2  -4   21.93    0.99
 -16   2   4   21.70    0.91
 -16  -2  -4   20.85    1.07
  16   2   4   22.40    0.91
  16   2   4   22.10    0.94
 -16   2  -4   22.32    0.91
 -16  -3  -4   10.47    0.70
  16   3  -4    9.74    0.62
 -16   3   4   10.84    0.58
  16   3  -4   10.72    0.63
 -16   3  -4   12.56    0.59
  16   3   4   10.69    0.59
  16   3   4   10.60    0.57
  16   4  -4    6.17    0.50
 -16   4   4    6.83    0.46
 -16  -4  -4    6.93    0.56
  16   4  -4    7.27    0.52
  16   4   4    6.79    0.49
 -16   4  -4    6.78    0.45
  16   4   4    6.59    0.44
 -16  -5  -4   14.69    0.93
  16   5  -4   15.41    0.83
 -16   5   4   14.67    0.79
  16   5  -4   14.93    0.86
  16   5  -4   15.47    0.88
  16   5   4   15.29    0.75
  16   5   4   15.95    0.84
 -16   5  -4   14.71    0.77
  16   6  -4    0.56    0.26
 -16   6   4    0.73    0.25
  16   6  -4    1.41    0.30
  16   6  -4    1.16    0.31
  16   6   4    0.86    0.27
 -16   6  -4    1.09    0.26
 -16   7   4    0.68    0.26
  16   7  -4    0.27    0.22
  16   7  -4    0.46    0.28
  16   7  -4    0.42    0.29
  16   7   4    0.39    0.28
 -16   7  -4    0.13    0.20
  16   0   5   16.83    0.73
 -16   0  -5   16.12    0.89
 -16   0  -5   16.14    0.53
 -16  -1  -5   31.38    1.47
 -16   1   5   32.63    1.20
  16   1  -5   30.78    1.31
  16   1   5   32.54    1.31
  16   1   5   32.70    1.23
 -16  -1   5   32.72    1.21
 -16   1  -5   30.92    1.46
 -16  -2  -5   20.68    1.06
 -16   2   5   18.93    0.83
  16   2  -5   19.60    0.94
 -16   2  -5   20.96    1.05
  16   2   5   17.53    0.85
  16   2   5   19.19    0.90
 -16  -2   5   18.94    0.77
 -16   2  -5   20.84    0.83
  16   3  -5   13.21    0.74
 -16  -3  -5   11.44    0.79
 -16   3   5   13.98    0.66
  16   3  -5   12.13    0.73
 -16   3  -5   12.93    0.63
  16   3   5   12.45    0.68
  16   3   5   12.16    0.68
 -16  -4  -5    8.93    0.69
  16   4  -5    8.71    0.63
  16   4  -5    9.52    0.63
 -16   4   5    9.47    0.57
  16   4   5    9.12    0.60
 -16   4  -5    8.92    0.53
  16   4   5    9.60    0.59
  16   5  -5    8.73    0.68
  16   5  -5    9.58    0.67
 -16   5   5   10.63    0.64
  16   5   5    9.74    0.62
 -16   5  -5   10.77    0.61
  16   5   5    9.31    0.66
  16   6  -5    1.30    0.35
  16   6  -5    1.94    0.37
 -16   6   5    1.99    0.33
  16   6  -5    2.20    0.37
 -16   6  -5    2.30    0.34
  16   6   5    2.81    0.42
 -16   0   6   28.77    1.19
  16   0   6   29.34    1.18
 -16   0  -6   30.86    1.43
  16   0  -6   28.32    1.25
  16   1  -6   11.23    0.68
 -16  -1  -6   11.87    0.77
 -16   1   6   13.02    0.57
 -16  -1   6   11.58    0.60
 -16   1  -6   12.73    0.78
  16   1   6   12.30    0.70
  16   1   6   11.80    0.64
 -16   2   6   27.35    1.07
  16   2  -6   25.77    1.21
 -16  -2  -6   26.50    1.35
  16   2   6   25.33    1.18
 -16  -2   6   27.70    1.06
 -16   2  -6   28.07    1.35
  16   2   6   25.28    1.12
  16   3  -6   24.41    1.21
 -16   3   6   26.87    1.09
 -16  -3  -6   26.63    1.37
  16   3   6   24.97    1.15
 -16   3  -6   27.04    1.06
  16   3   6   26.02    1.19
 -16   4   6   10.06    0.59
  16   4  -6    8.72    0.66
  16   4  -6   10.19    0.68
  16   4   6    9.77    0.64
 -16   4  -6    9.10    0.54
  16   4   6    9.15    0.63
 -16   5   6    2.62    0.34
  16   5  -6    1.09    0.32
  16   5  -6    1.82    0.35
  16   5   6    2.45    0.36
 -16   5  -6    1.51    0.26
  16   5   6    2.09    0.37
 -16   6   6    1.06    0.29
  16   6  -6    0.72    0.30
  16   6  -6    0.38    0.29
  16   6  -6    0.66    0.30
  16   6   6    0.75    0.29
  16   0   7   10.40    0.67
 -16   0  -7   10.77    0.74
  16   0  -7    9.02    0.61
 -16   0   7    9.42    0.58
  16   1  -7   10.18    0.68
 -16  -1  -7   11.34    0.79
  16   1   7   10.82    0.70
  16   1   7   12.36    0.68
 -16  -1   7   11.37    0.63
 -16   1  -7   11.40    0.78
 -16  -2  -7   13.59    0.89
  16   2  -7   12.00    0.77
  16   2   7   12.53    0.74
  16   2   7   11.98    0.76
 -16   2  -7   13.94    0.87
 -16  -2   7   13.18    0.66
  16   3  -7    3.94    0.46
  16   3   7    4.08    0.45
  16   3   7    3.75    0.43
  16   4  -7    3.22    0.43
  16   4  -7    2.80    0.42
  16   4   7    2.52    0.38
  16   4   7    3.01    0.40
  16   5  -7    1.06    0.32
  16   5  -7    0.93    0.32
  16   5   7    0.66    0.28
  16   5   7    1.16    0.32
 -16   0   8   15.55    0.82
  16   0  -8   14.64    0.85
  16   0   8   14.34    0.88
  16   1  -8    8.72    0.65
  16  -1   8    9.09    0.67
 -16   1   8    9.08    0.63
 -16  -1   8    9.10    0.59
  16   1   8    9.17    0.67
  16   2  -8   13.13    0.86
  16   2   8   14.96    0.91
  16   2   8   15.70    0.88
 -16  -2   8   16.58    0.79
  16   3  -8    2.69    0.42
  16   3   8    1.90    0.36
  16   3   8    2.19    0.37
  16   4  -8    5.76    0.63
  16   4  -8    5.74    0.57
  16   4   8    5.11    0.57
  16   4   8    5.67    0.58
 -16   0   9   16.88    0.92
  16   0   9   17.63    1.04
  16   0  -9   16.54    0.98
 -16   1   9    7.19    0.58
  16   1  -9    6.13    0.60
  16  -1   9    5.88    0.61
 -16  -1   9    7.17    0.55
  16   1   9    6.88    0.61
  16  -2   9    1.97    0.39
  16   2  -9    2.38    0.42
  16   2   9    2.33    0.42
  16   3  -9    1.32    0.35
  16   3   9    1.34    0.36
  16   3   9    2.52    0.43
  17   0   0    0.24    0.07
 -17   0   0    0.20    0.09
  17   0   0    0.20    0.09
 -17   0   0    0.32    0.11
 -17  -1   0    0.42    0.12
  17  -1   0    0.36    0.13
  17   1   0    0.61    0.11
  17   1   0    0.59    0.13
 -17   1   0    0.43    0.13
  17   2   0   17.86    0.81
 -17  -2   0   19.27    0.84
  17  -2   0   19.05    0.88
  17   2   0   18.71    0.76
  17   2   0   19.54    0.64
 -17   2   0   18.41    0.81
  17   3   0    7.66    0.49
 -17   3   0    6.85    0.45
  17   3   0    8.12    0.43
  17   3   0    8.05    0.45
 -17  -3   0    7.78    0.46
  17   4   0   10.84    0.60
 -17  -4   0   11.12    0.62
 -17   4   0   11.21    0.62
  17   4   0   10.95    0.58
 -17   5   0   16.87    0.87
  17   5   0   17.27    0.93
 -17  -5   0   19.08    0.93
  17   5   0   17.64    0.86
  17   5   0   18.25    0.90
 -17   6   0   18.48    0.94
 -17  -6   0   16.73    0.94
  17   6   0   17.32    0.91
  17   6   0   16.92    0.97
  17   6   0   16.60    0.93
  17   7   0    6.96    0.62
  17   7   0    7.26    0.69
 -17   7   0    6.36    0.56
 -17  -7   0    6.38    0.59
  17   7   0    6.90    0.58
  17   0   1    0.20    0.08
  17   0  -1    0.12    0.08
 -17   0   1    0.20    0.09
  17   0  -1    0.08    0.06
  17   0   1    0.03    0.09
 -17   0  -1    0.05    0.08
  17  -1   1   14.89    0.73
  17   1  -1   14.51    0.62
 -17  -1  -1   13.15    0.68
  17   1  -1   14.10    0.64
 -17   1   1   13.43    0.65
  17   1   1   14.13    0.55
  17   1   1   14.08    0.63
  17   1   1   14.68    0.53
  17  -1  -1   14.33    0.67
 -17  -1   1   15.13    0.64
  17   1   1   14.46    0.72
 -17   1  -1   14.59    0.67
  17   2  -1    7.94    0.43
  17  -2   1    7.42    0.49
  17   2  -1    7.80    0.46
 -17   2   1    6.59    0.43
 -17  -2  -1    7.33    0.46
  17  -2   1    7.98    0.35
 -17  -2   1    7.36    0.40
 -17   2  -1    7.79    0.46
  17   2   1    8.07    0.35
  17  -2  -1    7.72    0.46
  17   2   1    7.87    0.46
  17   2   1    7.96    0.39
  17   2   1    7.83    0.38
 -17  -3  -1   13.28    0.68
 -17   3   1   10.96    0.60
  17   3  -1   11.98    0.60
  17   3  -1   13.45    0.66
 -17  -3   1   11.93    0.59
 -17   3  -1   11.39    0.61
  17   3   1   12.32    0.58
  17   3   1   11.55    0.63
  17   3   1   11.79    0.56
  17   3   1   11.17    0.45
  17   4  -1    7.92    0.51
  17   4  -1    8.31    0.56
 -17   4   1    7.81    0.51
 -17  -4  -1    8.43    0.55
  17   4  -1    8.07    0.49
 -17  -4   1    8.41    0.49
 -17   4  -1    8.55    0.52
  17   4   1    8.47    0.56
  17   4   1    8.81    0.51
  17   4   1    8.30    0.49
  17   5  -1   26.91    1.25
 -17   5   1   27.30    1.20
 -17  -5  -1   27.94    1.29
  17   5  -1   26.78    1.21
  17   5  -1   28.81    1.18
  17   5   1   26.19    1.25
  17   5   1   27.69    1.17
 -17   5  -1   26.45    1.19
 -17  -5   1   26.59    1.21
  17   5   1   27.43    1.19
  17   6  -1   11.37    0.76
  17   6  -1   13.51    0.77
 -17   6   1   10.65    0.70
 -17  -6  -1   12.62    0.79
  17   6  -1   12.97    0.82
  17   6   1   12.70    0.76
 -17   6  -1   12.72    0.75
  17   6   1   13.30    0.83
 -17  -6   1   12.78    0.75
  17   7  -1   12.24    0.79
  17   7  -1   10.40    0.78
  17   7  -1   12.22    0.86
 -17   7   1   11.98    0.78
  17   7   1   11.67    0.78
 -17   7  -1   11.49    0.76
  17   0  -2    0.01    0.07
  17   0   2    0.14    0.12
 -17   0  -2    0.08    0.09
  17   0  -2   -0.01    0.06
  17   0   2    0.07    0.06
  17   0   2    0.00    0.06
 -17   0   2    0.18    0.09
  17  -1   2    0.96    0.11
 -17  -1  -2    1.15    0.11
  17  -1   2    1.13    0.21
  17  -1   2    0.90    0.09
 -17   1   2    0.90    0.16
 -17  -1  -2    1.01    0.18
  17   1  -2    0.85    0.15
  17   1   2    0.95    0.12
  17  -1  -2    1.14    0.16
 -17   1  -2    0.91    0.18
  17   1   2    1.00    0.20
  17   1   2    0.88    0.15
 -17   1  -2    1.13    0.17
 -17  -2  -2    1.94    0.25
  17  -2   2    2.50    0.15
  17  -2   2    2.37    0.15
 -17   2   2    2.53    0.26
  17   2  -2    1.99    0.24
  17   2  -2    2.77    0.27
  17   2   2    2.49    0.26
  17   2   2    2.18    0.20
  17   2   2    2.12    0.19
 -17   2  -2    2.64    0.26
 -17  -2   2    2.31    0.18
  17   2   2    2.40    0.21
  17   3  -2   17.11    0.84
 -17  -3  -2   17.63    0.90
  17   3  -2   17.72    0.82
 -17   3   2   16.36    0.80
 -17   3  -2   17.45    0.80
  17   3   2   18.66    0.77
 -17  -3   2   17.79    0.75
  17   3   2   18.31    0.70
  17   3   2   18.08    0.85
  17   3   2   17.84    0.75
 -17  -4  -2   43.19    1.84
 -17   4   2   42.29    1.65
  17   4  -2   43.00    1.70
  17   4  -2   44.24    1.61
  17   4  -2   43.86    1.68
  17   4   2   43.07    1.60
 -17  -4   2   44.29    1.68
 -17   4  -2   41.83    1.64
  17   4   2   43.02    1.71
  17   4   2   42.38    1.49
  17   5  -2   16.33    0.86
  17   5  -2   14.66    0.82
 -17  -5  -2   14.59    0.86
 -17   5   2   14.74    0.79
  17   5  -2   15.81    0.79
  17   5   2   16.14    0.88
 -17   5  -2   13.84    0.77
  17   5   2   14.98    0.79
 -17  -5   2   15.69    0.76
  17   6  -2    4.74    0.45
 -17   6   2    3.80    0.42
 -17  -6  -2    3.65    0.45
  17   6  -2    3.75    0.46
  17   6  -2    4.31    0.47
  17   6   2    3.76    0.42
 -17   6  -2    3.91    0.41
 -17   7   2    2.83    0.40
  17   7  -2    3.58    0.51
  17   7  -2    3.38    0.44
  17   7  -2    3.35    0.48
 -17   7  -2    3.96    0.45
  17   7   2    4.47    0.49
  17   0   3   -0.05    0.08
 -17   0  -3   -0.01    0.09
  17   0   3    0.03    0.07
  17   0  -3    0.01    0.06
 -17  -1  -3    8.66    0.57
 -17   1   3    9.96    0.52
 -17  -1  -3   10.02    0.36
  17  -1   3    9.82    0.40
  17  -1   3    9.52    0.42
  17   1  -3   10.77    0.55
  17   1   3   10.04    0.50
  17   1   3    9.87    0.46
  17  -1  -3    9.27    0.47
 -17   1  -3   10.11    0.51
 -17   1  -3   10.01    0.61
 -17   2   3    5.90    0.40
 -17  -2  -3    6.86    0.49
  17   2  -3    8.06    0.47
  17   2   3    6.01    0.37
  17   2   3    7.02    0.40
  17   2   3    7.03    0.44
 -17   2  -3    6.36    0.40
 -17  -3  -3    7.55    0.55
  17   3  -3    8.21    0.52
 -17   3   3    6.62    0.45
  17   3  -3    7.54    0.51
  17   3   3    8.16    0.53
  17   3   3    7.36    0.45
  17   3   3    7.55    0.43
 -17  -3   3    7.79    0.35
 -17   3  -3    7.83    0.47
  17   4  -3    8.93    0.60
 -17   4   3   10.15    0.58
  17   4  -3    9.31    0.60
 -17  -4  -3    9.80    0.66
 -17  -4   3    9.65    0.47
  17   4   3    9.35    0.56
 -17   4  -3    8.71    0.54
  17   4   3   10.31    0.64
  17   4   3    9.29    0.49
  17   5  -3   16.52    0.90
 -17  -5  -3   16.92    0.97
 -17   5   3   17.02    0.85
  17   5  -3   16.20    0.84
  17   5  -3   16.69    0.91
 -17   5  -3   15.50    0.82
  17   5   3   15.63    0.84
  17   6  -3    7.35    0.61
  17   6  -3    7.56    0.57
  17   6  -3    7.36    0.60
 -17   6   3    6.65    0.53
  17   6   3    6.15    0.55
 -17   6  -3    7.03    0.54
  17   7  -3    7.14    0.68
  17   7  -3    6.35    0.64
 -17   7   3    6.61    0.56
  17   7  -3    6.05    0.59
  17   7   3    7.18    0.63
 -17   7  -3    7.25    0.59
  17   0   4   -0.09    0.09
 -17   0  -4    0.14    0.13
  17   1  -4    9.27    0.54
 -17  -1  -4    9.32    0.34
 -17   1   4    8.83    0.49
 -17  -1  -4    8.23    0.58
  17  -1   4    9.77    0.47
 -17   1  -4    8.86    0.60
  17   1   4    9.38    0.47
  17  -1  -4    9.35    0.45
 -17   1  -4    9.14    0.49
 -17  -2  -4   15.50    0.86
 -17   2   4   14.49    0.70
  17   2  -4   15.77    0.78
 -17   2  -4   15.87    0.71
  17   2   4   14.93    0.72
  17   2   4   14.71    0.69
 -17  -3  -4   12.84    0.79
 -17   3   4   12.21    0.65
  17   3  -4   13.04    0.72
  17   3  -4   12.51    0.72
 -17   3  -4   12.96    0.65
  17   3   4   13.27    0.67
  17   3   4   14.51    0.67
  17   4  -4    4.46    0.44
 -17   4   4    4.42    0.38
  17   4  -4    4.43    0.43
 -17  -4  -4    4.36    0.45
  17   4   4    5.13    0.42
 -17   4  -4    4.54    0.37
  17   4   4    4.10    0.35
 -17  -5  -4    8.38    0.67
  17   5  -4    8.23    0.61
  17   5  -4    8.37    0.62
 -17   5   4    8.61    0.58
  17   5  -4    8.94    0.60
  17   5   4    7.45    0.57
 -17   5  -4    8.75    0.56
  17   6  -4   24.12    1.26
 -17   6   4   24.69    1.17
  17   6  -4   22.14    1.20
  17   6  -4   25.38    1.20
  17   6   4   23.94    1.19
 -17   6  -4   25.24    1.15
  17   7  -4    6.80    0.63
  17   7  -4    6.90    0.70
  17   7  -4    7.24    0.68
 -17   7   4    5.75    0.56
 -17   7  -4    6.65    0.57
  17   7   4    6.48    0.64
  17   0   5   -0.02    0.11
 -17   0  -5   -0.01    0.11
 -17  -1  -5   15.47    0.88
  17   1  -5   14.53    0.78
 -17   1   5   16.72    0.71
  17   1   5   15.81    0.78
 -17   1  -5   15.58    0.88
  17   1   5   15.41    0.72
  17   2  -5    5.09    0.43
 -17   2   5    4.76    0.35
 -17  -2  -5    5.29    0.47
 -17  -2   5    5.07    0.31
  17   2   5    5.48    0.42
  17   2   5    4.99    0.39
 -17   2  -5    4.69    0.45
 -17   2  -5    5.50    0.36
  17   3  -5   11.60    0.68
 -17  -3  -5   10.74    0.74
  17   3  -5   11.15    0.69
 -17   3   5    9.74    0.57
  17   3   5   10.53    0.62
 -17   3  -5   11.81    0.60
  17   3   5   10.20    0.61
 -17  -4  -5    4.47    0.51
  17   4  -5    3.81    0.44
  17   4  -5    4.43    0.45
 -17   4   5    4.45    0.39
  17   4   5    4.86    0.45
  17   4   5    4.93    0.41
 -17   4  -5    3.66    0.35
  17   5  -5    9.51    0.69
  17   5  -5    9.94    0.72
 -17   5   5   11.27    0.66
  17   5   5    8.04    0.63
 -17   5  -5    9.54    0.59
  17   5   5   10.27    0.63
  17   6  -5    6.12    0.60
 -17   6   5    6.43    0.52
  17   6  -5    5.61    0.55
  17   6  -5    5.48    0.60
  17   6   5    6.52    0.59
 -17   6  -5    5.25    0.49
  17   0   6    0.05    0.13
  17   0  -6    0.06    0.12
 -17   0  -6    0.03    0.15
  17   1  -6    1.13    0.25
 -17  -1  -6    1.37    0.29
 -17   1   6    1.39    0.19
 -17  -1   6    0.98    0.19
  17   1   6    0.90    0.21
  17   1   6    1.50    0.27
 -17   1  -6    1.23    0.27
  17   2  -6    1.19    0.25
 -17   2   6    1.16    0.20
 -17  -2  -6    0.83    0.26
  17   2   6    1.22    0.24
 -17  -2   6    1.12    0.18
 -17   2  -6    1.09    0.27
  17   2   6    1.18    0.26
 -17   3   6    3.61    0.34
  17   3  -6    4.14    0.44
 -17  -3  -6    4.44    0.50
  17   3  -6    3.94    0.44
  17   3   6    3.99    0.41
  17   3   6    4.30    0.42
 -17   3  -6    4.08    0.34
  17   4  -6   19.80    1.02
  17   4  -6   17.04    1.00
 -17   4   6   19.43    0.91
  17   4   6   17.80    0.94
 -17   4  -6   19.38    0.87
  17   4   6   18.52    0.96
 -17   5   6    6.52    0.52
  17   5  -6    7.49    0.62
  17   5  -6    6.89    0.62
 -17   5  -6    6.57    0.50
  17   5   6    7.44    0.58
  17   5   6    6.22    0.57
  17   6  -6    3.25    0.49
 -17   6   6    2.58    0.38
  17   6  -6    1.99    0.44
  17   6  -6    3.23    0.45
  17   6   6    3.82    0.49
 -17   0   7    0.08    0.14
 -17   0  -7    0.12    0.19
  17   0  -7    0.06    0.13
  17   0   7    0.22    0.17
  17   1  -7    0.52    0.21
 -17  -1  -7    0.57    0.25
  17   1   7    0.37    0.19
 -17  -1   7    0.44    0.17
 -17   1  -7    0.54    0.24
  17   1   7    0.43    0.20
  17   2  -7    2.62    0.37
 -17  -2  -7    2.63    0.41
  17   2   7    2.82    0.36
 -17  -2   7    2.94    0.30
  17   2   7    2.51    0.36
 -17   2  -7    2.81    0.41
  17   3  -7    7.90    0.63
  17   3   7    8.10    0.61
  17   3   7    8.16    0.62
  17   4  -7    6.72    0.56
  17   4  -7    4.77    0.55
  17   4   7    6.23    0.54
  17   4   7    6.43    0.56
  17   5  -7    4.78    0.55
  17   5   7    5.37    0.55
  17   5   7    5.78    0.58
  17   0  -8    0.14    0.15
 -17   0   8   -0.07    0.16
  17   0   8   -0.10    0.17
  17   1  -8    1.77    0.34
  17   1   8    2.18    0.37
 -17  -1   8    2.14    0.30
  17   2  -8    2.57    0.40
  17   2   8    2.54    0.39
  17   2   8    2.60    0.41
  17   3  -8    0.71    0.26
  17   3   8    0.66    0.27
  17   3   8    0.41    0.27
  17   4  -8    1.98    0.42
  17   4  -8    2.59    0.40
  17   4   8    1.94    0.40
  17   4   8    1.89    0.39
  17   0   9    0.42    0.25
  17   0  -9   -0.02    0.21
 -17   0   9    0.44    0.23
  17   1  -9    0.38    0.24
  17  -1   9    0.59    0.26
  17   1   9    0.91    0.32
  17  -1  -9    0.67    0.28
 -17  -1   9    0.59    0.24
  17   2  -9    1.09    0.33
  17   2   9    1.26    0.35
  17   3  -9    3.37    0.49
  17   3   9    2.63    0.45
  18   0   0   58.35    2.15
 -18   0   0   54.88    1.97
  18   0   0   56.44    1.85
 -18   0   0   55.79    2.13
  18  -1   0  128.67    4.47
 -18   1   0  124.64    4.06
  18   1   0  126.31    4.44
  18   1   0  123.58    3.92
  18   1   0  119.09    4.01
 -18  -1   0  120.25    4.42
  18   2   0    1.32    0.17
  18  -2   0    1.56    0.22
  18   2   0    1.66    0.11
  18   2   0    1.39    0.20
 -18  -2   0    1.55    0.19
 -18   2   0    1.33    0.20
  18   3   0   27.58    1.15
  18   3   0   26.71    1.02
 -18   3   0   26.40    1.11
 -18  -3   0   27.10    1.16
  18   3   0   26.60    1.06
 -18   4   0    4.73    0.38
 -18  -4   0    4.88    0.38
  18   4   0    4.58    0.37
  18   4   0    4.53    0.41
  18   4   0    4.84    0.36
 -18   5   0   28.89    1.22
  18   5   0   27.66    1.16
  18   5   0   26.62    1.24
  18   5   0   24.76    1.17
 -18  -5   0   26.66    1.24
 -18  -6   0    0.31    0.21
  18   6   0    0.19    0.20
 -18   6   0    0.45    0.22
  18   6   0    0.67    0.22
  18   6   0    0.05    0.17
  18   7   0    0.09    0.22
 -18   7   0    0.16    0.19
  18   7   0    0.05    0.21
  18   7   0    0.11    0.27
  18   0  -1   97.70    3.19
  18   0   1  105.57    3.66
  18   0   1   98.85    3.10
  18   0   1   98.39    3.21
 -18   0  -1   94.60    3.62
 -18   0   1   98.90    3.29
  18   0  -1   99.91    3.56
  18   1  -1   12.81    0.61
  18  -1   1   14.91    0.72
 -18  -1  -1   12.64    0.66
 -18   1   1   13.79    0.65
  18  -1   1   13.26    0.49
  18   1  -1   13.15    0.59
  18   1  -1   12.44    0.62
  18   1   1   12.48    0.60
  18   1   1   14.71    0.72
 -18   1  -1   13.14    0.64
  18   1   1   13.74    0.50
 -18  -1   1   13.29    0.61
  18   1   1   13.95    0.53
  18  -1  -1   13.17    0.64
  18   2  -1   67.52    2.28
  18   2  -1   65.30    2.34
  18  -2   1   68.84    2.16
 -18  -2  -1   65.74    2.54
 -18   2   1   66.25    2.33
 -18   2  -1   67.02    2.33
  18   2   1   67.62    2.17
  18  -2  -1   68.75    2.54
 -18  -2   1   65.37    2.46
  18   2   1   64.15    2.21
  18   2   1   71.06    2.22
  18   2   1   67.77    2.33
 -18  -3  -1    9.97    0.59
 -18   3   1   11.05    0.59
  18   3  -1   10.26    0.59
  18   3  -1   10.15    0.55
  18   3   1    9.63    0.58
  18   3   1   10.48    0.53
 -18   3  -1   11.16    0.58
  18   3   1   10.24    0.41
 -18  -3   1   10.44    0.54
  18   3   1   11.13    0.53
 -18  -4  -1   23.79    1.13
  18   4  -1   24.16    1.06
  18   4  -1   23.10    1.09
 -18   4   1   24.88    1.07
  18   4  -1   23.13    0.99
  18   4   1   24.00    1.03
  18   4   1   22.96    1.09
  18   4   1   24.89    1.01
 -18  -4   1   24.71    1.07
 -18   4  -1   24.82    1.07
  18   5  -1    1.23    0.26
  18   5  -1    1.93    0.32
 -18  -5  -1    1.39    0.27
 -18   5   1    1.91    0.29
  18   5  -1    1.77    0.27
  18   5   1    1.94    0.29
 -18   5  -1    1.24    0.25
  18   5   1    1.81    0.28
  18   5   1    1.31    0.29
 -18  -5   1    1.86    0.27
 -18  -6  -1    3.98    0.46
  18   6  -1    4.32    0.46
 -18   6   1    4.85    0.46
  18   6  -1    4.48    0.51
  18   6  -1    4.97    0.46
 -18  -6   1    4.48    0.42
 -18   6  -1    4.56    0.46
  18   6   1    4.03    0.45
  18   6   1    4.47    0.52
  18   6   1    3.93    0.43
 -18   7   1    0.39    0.21
  18   7  -1    0.19    0.25
  18   7  -1    0.33    0.24
  18   7  -1    0.27    0.29
 -18   7  -1    0.77    0.25
  18   7   1    0.51    0.26
  18   0  -2   14.04    0.62
  18   0   2   14.05    0.51
  18   0  -2   14.07    0.63
 -18   0   2   13.92    0.66
  18   0   2   15.74    0.79
 -18   0  -2   13.70    0.73
  18   0   2   14.58    0.60
  18   1  -2   79.16    2.58
  18  -1   2   75.74    2.34
 -18  -1  -2   74.26    2.88
  18  -1   2   74.67    2.46
 -18   1   2   75.93    2.61
 -18   1  -2   75.93    2.90
  18  -1  -2   79.25    2.80
  18   1   2   75.72    2.41
  18   1   2   81.34    2.94
  18   1   2   74.43    2.55
 -18   1  -2   77.98    2.61
  18   1   2   73.68    2.41
  18   2  -2    9.31    0.50
  18  -2   2    8.21    0.35
  18   2  -2    8.59    0.51
  18  -2   2    8.80    0.34
 -18  -2  -2    8.79    0.54
 -18   2   2    7.98    0.48
 -18  -2   2    9.05    0.41
  18   2   2    8.61    0.43
 -18   2  -2    8.68    0.49
  18   2   2    8.09    0.40
  18   2   2    7.99    0.48
  18   2   2    9.14    0.43
  18  -2  -2    9.06    0.50
 -18  -3  -2   66.11    2.54
  18   3  -2   63.71    2.32
 -18   3   2   63.92    2.28
  18   3  -2   66.40    2.28
  18   3   2   63.48    2.15
  18   3   2   61.74    2.29
 -18   3  -2   63.96    2.27
 -18  -3   2   64.79    2.34
  18   3   2   62.91    2.16
  18   3   2   65.31    2.19
  18   4  -2    3.10    0.34
  18   4  -2    3.25    0.32
  18   4  -2    3.23    0.36
 -18  -4  -2    3.65    0.39
 -18   4   2    2.60    0.31
  18   4   2    2.86    0.36
 -18  -4   2    2.72    0.25
  18   4   2    2.80    0.31
 -18   4  -2    2.71    0.31
 -18   5   2    3.04    0.35
  18   5  -2    3.64    0.37
  18   5  -2    3.15    0.38
 -18  -5  -2    3.56    0.41
  18   5  -2    4.02    0.44
  18   5   2    3.03    0.36
 -18  -5   2    3.41    0.31
 -18   5  -2    2.71    0.33
  18   5   2    3.03    0.40
  18   6  -2    2.15    0.34
 -18  -6  -2    2.14    0.36
  18   6  -2    1.87    0.34
 -18   6   2    1.47    0.29
  18   6  -2    2.16    0.38
 -18   6  -2    1.99    0.32
  18   6   2    2.04    0.34
 -18   7   2    3.60    0.44
  18   7  -2    3.11    0.50
  18   7  -2    2.94    0.42
  18   7  -2    3.58    0.50
 -18   7  -2    3.34    0.43
  18   7   2    3.37    0.46
  18   0   3   90.03    2.91
  18   0  -3   91.31    3.16
 -18   0  -3   87.06    3.37
  18   0   3   86.60    2.80
  18   0  -3   92.81    3.01
 -18   1   3    6.18    0.40
 -18  -1  -3    6.64    0.47
  18  -1   3    6.25    0.30
  18   1  -3    7.35    0.44
 -18  -1  -3    6.69    0.26
  18  -1   3    6.01    0.31
  18   1   3    6.38    0.35
  18   1   3    6.56    0.40
  18  -1  -3    6.44    0.36
 -18   1  -3    6.59    0.41
 -18   1  -3    6.09    0.47
 -18   2   3   65.41    2.27
  18   2  -3   65.91    2.30
 -18  -2  -3   61.98    2.55
  18   2   3   66.18    2.29
  18   2   3   65.74    2.17
 -18   2  -3   63.42    2.27
  18   2   3   66.83    2.26
  18   3  -3   13.22    0.72
 -18  -3  -3   13.85    0.80
  18   3  -3   13.07    0.71
 -18   3   3   14.37    0.70
  18   3   3   13.58    0.73
  18   3   3   14.62    0.64
 -18  -3   3   14.16    0.56
  18   3   3   13.51    0.66
 -18   3  -3   12.65    0.67
  18   4  -3   10.45    0.65
  18   4  -3    9.93    0.64
 -18   4   3   10.70    0.62
 -18  -4  -3   11.23    0.72
 -18   4  -3   10.99    0.61
  18   4   3   10.87    0.62
  18   4   3   10.70    0.68
  18   4   3   10.35    0.53
  18   5  -3    0.53    0.22
 -18  -5  -3    0.68    0.24
  18   5  -3    0.37    0.22
 -18   5   3    0.83    0.22
  18   5  -3    0.50    0.20
 -18   5  -3    1.06    0.24
  18   5   3    0.83    0.24
  18   6  -3    2.28    0.38
  18   6  -3    2.53    0.42
  18   6  -3    2.98    0.40
 -18   6   3    3.55    0.40
  18   6   3    2.44    0.38
 -18   6  -3    2.51    0.35
  18   7  -3    1.33    0.37
  18   7  -3    1.14    0.32
 -18   7   3    1.33    0.33
  18   7  -3    1.44    0.38
 -18   7  -3    0.93    0.28
  18   7   3    1.25    0.35
  18   0   4    9.61    0.47
 -18   0  -4    9.97    0.63
  18   0  -4    9.21    0.54
  18   1  -4   64.86    2.30
 -18   1   4   63.36    2.23
  18  -1   4   66.85    2.13
 -18  -1  -4   61.70    2.57
 -18   1  -4   65.98    2.60
  18  -1  -4   67.40    2.36
 -18   1  -4   64.83    2.24
  18   1   4   62.48    2.15
 -18  -2  -4    7.00    0.54
  18   2  -4    6.99    0.49
 -18   2   4    7.40    0.46
  18   2   4    8.82    0.48
 -18   2  -4    7.22    0.45
  18   2   4    8.77    0.49
  18   3  -4   16.93    0.86
  18   3  -4   15.22    0.84
 -18  -3  -4   16.89    0.95
 -18   3   4   18.37    0.81
  18   3   4   16.24    0.78
  18   3   4   16.27    0.79
 -18   3  -4   17.10    0.79
  18   4  -4    2.37    0.33
 -18   4   4    2.70    0.32
 -18  -4  -4    2.67    0.38
  18   4  -4    2.27    0.33
  18   4   4    2.45    0.28
  18   4   4    3.00    0.35
 -18   4  -4    2.81    0.30
  18   5  -4   16.04    0.94
 -18   5   4   16.77    0.88
  18   5  -4   17.37    0.90
  18   5  -4   17.53    0.96
 -18   5  -4   17.96    0.87
  18   5   4   15.94    0.89
  18   6  -4    1.89    0.39
  18   6  -4    1.82    0.37
  18   6  -4    2.54    0.39
 -18   6   4    1.47    0.30
  18   6   4    1.53    0.35
 -18   6  -4    2.02    0.33
  18   7  -4    0.11    0.27
  18   7  -4    0.19    0.30
  18   7  -4    0.18    0.24
 -18   7   4    0.36    0.24
 -18   7  -4    0.07    0.22
  18   7   4    0.63    0.29
  18   0   5   56.05    1.93
  18   0  -5   54.28    2.06
 -18   0  -5   58.30    2.35
  18  -1   5   17.26    0.75
 -18  -1  -5   17.20    0.95
 -18   1   5   16.57    0.75
  18   1  -5   17.19    0.85
  18   1   5   16.83    0.83
  18   1   5   15.86    0.75
 -18   1  -5   17.82    0.96
 -18   2   5   28.05    1.13
 -18  -2  -5   27.40    1.37
  18   2  -5   27.24    1.23
  18   2   5   28.48    1.20
  18   2   5   27.77    1.15
 -18   2  -5   28.60    1.12
  18   3  -5    5.08    0.44
 -18  -3  -5    4.56    0.47
 -18   3   5    4.52    0.37
  18   3  -5    3.47    0.40
 -18   3  -5    5.02    0.38
  18   3   5    4.18    0.39
  18   3   5    4.20    0.40
  18   4  -5   11.30    0.72
  18   4  -5   11.20    0.73
 -18   4   5    9.86    0.61
 -18  -4  -5   11.09    0.79
  18   4   5   10.63    0.63
 -18   4  -5   11.30    0.62
  18   4   5   10.55    0.67
  18   5  -5    2.40    0.40
  18   5  -5    2.64    0.41
 -18   5   5    1.96    0.32
 -18   5  -5    2.31    0.31
  18   5   5    2.13    0.36
 -18   6   5    2.27    0.36
  18   6  -5    1.70    0.39
  18   6  -5    3.30    0.48
  18   6  -5    3.07    0.43
  18   6   5    1.79    0.38
 -18   6  -5    2.29    0.34
  18   0  -6    1.34    0.25
 -18   0  -6    1.50    0.30
  18   0   6    2.79    0.30
  18   1  -6   28.55    1.29
 -18  -1  -6   29.90    1.47
  18   1   6   30.37    1.31
 -18   1  -6   30.04    1.46
  18   1   6   29.64    1.21
 -18   2   6    8.32    0.48
 -18  -2  -6    6.57    0.59
  18   2  -6    6.01    0.51
  18   2   6    7.20    0.53
 -18   2  -6    7.03    0.59
 -18  -2   6    7.63    0.43
  18   2   6    7.07    0.50
  18   3  -6   23.07    1.17
  18   3  -6   23.68    1.16
 -18  -3  -6   24.69    1.32
 -18   3   6   24.92    1.06
 -18   3  -6   25.04    1.03
  18   3   6   24.69    1.14
  18   3   6   24.06    1.11
  18   4  -6    1.68    0.34
  18   4  -6    1.22    0.31
 -18   4   6    1.78    0.28
  18   4   6    1.56    0.31
 -18   4  -6    1.38    0.25
  18   4   6    1.93    0.32
 -18   5   6    1.60    0.30
  18   5  -6    1.54    0.35
  18   5  -6    1.77    0.38
  18   5   6    1.29    0.32
 -18   5  -6    1.44    0.28
  18   6  -6    0.72    0.33
  18   6  -6    0.35    0.25
 -18   6   6    0.43    0.25
  18   6  -6    0.37    0.29
  18   6   6    0.55    0.27
  18   0  -7   15.49    0.87
 -18   0  -7   18.00    1.04
  18   0   7   16.76    0.92
  18   1  -7   12.94    0.79
 -18  -1  -7   14.39    0.92
  18   1   7   13.16    0.80
  18   1   7   14.02    0.76
 -18   1  -7   14.31    0.91
 -18  -1   7   13.64    0.70
  18   2  -7   15.49    0.93
  18   2   7   17.11    0.90
 -18   2  -7   18.61    1.07
  18   2   7   18.85    0.97
  18   3  -7    1.06    0.29
  18   3   7    1.68    0.32
  18   3   7    1.35    0.31
  18   4  -7   10.83    0.75
  18   4  -7    9.36    0.74
  18   4   7    9.05    0.69
  18   4   7    9.89    0.70
  18   5  -7    1.44    0.36
  18   5  -7    1.70    0.38
  18   5   7    1.40    0.36
  18   5   7    1.26    0.34
  18   0  -8    2.98    0.39
  18   0   8    2.86    0.41
  18   1  -8   22.31    1.16
  18   1   8   22.22    1.17
  18   1   8   22.56    1.10
 -18  -1   8   22.20    1.03
  18   2  -8    0.66    0.26
  18   2   8    1.05    0.30
  18   2   8    0.57    0.28
  18   3  -8    3.69    0.48
  18   3   8    3.05    0.45
  18   3   8    3.58    0.45
  18   4  -8    0.34    0.28
  18   4  -8    0.51    0.30
  18   4   8    0.90    0.31
  18   4   8    1.02    0.34
  18   0  -9   11.43    0.81
  18   0   9   12.75    0.86
  18  -1   9    5.63    0.59
  18   1  -9    5.50    0.58
  18  -1  -9    6.16    0.60
 -18  -1   9    6.19    0.51
  18   1   9    6.64    0.62
  18   2  -9    3.62    0.51
  18   2   9    3.58    0.51
 -19   0   0    0.23    0.10
  19   0   0    0.21    0.11
  19   0   0    0.12    0.07
  19   1   0    0.27    0.10
 -19   1   0    0.19    0.11
  19  -1   0    0.13    0.12
  19   1   0    0.26    0.13
 -19  -1   0    0.07    0.08
 -19  -2   0   30.23    1.27
  19   2   0   30.29    1.15
  19   2   0   31.74    1.23
 -19   2   0   29.45    1.22
  19   2   0   33.11    1.04
  19   3   0    0.09    0.12
 -19  -3   0    0.03    0.11
  19   3   0    0.09    0.10
  19   3   0    0.14    0.11
 -19   3   0    0.03    0.11
  19   4   0    8.48    0.51
  19   4   0    9.21    0.54
 -19   4   0    8.63    0.55
  19   4   0    7.93    0.56
 -19  -4   0    9.07    0.55
 -19  -5   0    1.31    0.25
  19   5   0    1.61    0.27
 -19   5   0    1.39    0.27
  19   5   0    1.37    0.27
  19   5   0    1.27    0.29
  19   6   0   39.11    1.77
 -19   6   0   41.25    1.71
  19   6   0   41.24    1.67
 -19  -6   0   41.32    1.80
  19   7   0    0.27    0.28
 -19   7   0   -0.08    0.18
  19   7   0    0.34    0.25
  19   7   0    0.53    0.26
 -19   0   1    0.21    0.10
  19   0   1    0.34    0.13
 -19   0  -1    0.30    0.12
  19   0  -1    0.24    0.09
  19   0   1    0.14    0.05
  19   0   1    0.18    0.09
  19   0  -1    0.18    0.10
  19   1  -1    5.76    0.38
  19  -1   1    6.38    0.45
  19  -1   1    6.31    0.27
 -19   1   1    5.97    0.40
  19  -1   1    6.45    0.33
  19   1  -1    5.79    0.36
 -19  -1  -1    5.67    0.39
  19   1  -1    6.24    0.35
  19  -1  -1    5.76    0.38
  19   1   1    6.10    0.30
  19   1   1    6.26    0.29
  19   1   1    6.22    0.44
 -19   1  -1    5.59    0.39
  19   1   1    5.99    0.37
 -19  -1   1    5.99    0.35
 -19  -2  -1    0.55    0.15
 -19   2   1    0.59    0.16
  19   2  -1    0.64    0.14
  19   2  -1    0.72    0.17
  19   2   1    0.55    0.16
 -19   2  -1    0.23    0.12
  19   2   1    0.77    0.13
  19  -2  -1    0.57    0.16
  19   2   1    0.65    0.13
 -19  -2   1    0.40    0.12
  19   2   1    0.35    0.10
 -19  -3  -1   27.13    1.19
 -19   3   1   25.72    1.10
  19   3  -1   26.08    1.08
  19   3  -1   26.69    1.13
 -19  -3   1   26.55    1.10
 -19   3  -1   26.78    1.11
  19   3   1   25.91    0.90
  19   3   1   25.88    1.13
  19   3   1   27.34    1.04
  19   3   1   25.85    1.02
  19   4  -1    1.87    0.30
 -19  -4  -1    1.59    0.26
  19   4  -1    1.32    0.24
 -19   4   1    1.10    0.23
  19   4  -1    1.33    0.22
 -19  -4   1    1.66    0.23
 -19   4  -1    1.66    0.26
  19   4   1    2.06    0.26
  19   4   1    1.59    0.28
  19   4   1    1.43    0.23
 -19   5   1   20.48    0.99
 -19  -5  -1   20.21    1.05
  19   5  -1   20.28    0.95
  19   5  -1   20.67    1.00
  19   5  -1   19.45    1.02
  19   5   1   20.60    0.97
 -19  -5   1   19.64    0.97
  19   5   1   20.12    1.05
 -19   5  -1   19.46    0.97
  19   5   1   20.03    0.95
 -19   6   1    0.98    0.27
  19   6  -1    1.57    0.35
 -19  -6  -1    1.20    0.29
  19   6  -1    1.35    0.30
  19   6  -1    1.60    0.30
 -19   6  -1    1.37    0.29
  19   6   1    1.67    0.33
  19   6   1    1.66    0.37
  19   6   1    1.24    0.30
 -19   7   1   12.76    0.83
  19   7  -1   14.84    0.88
  19   7  -1   12.98    0.92
  19   7   1   13.16    0.85
  19   7   1   12.49    0.91
 -19   7  -1   13.27    0.85
  19   0  -2    0.00    0.07
 -19   0  -2    0.01    0.09
  19   0   2    0.11    0.06
  19   0  -2   -0.05    0.06
  19   0   2   -0.04    0.07
 -19   1   2    3.30    0.29
  19   1  -2    4.01    0.29
 -19  -1  -2    2.76    0.29
  19  -1   2    3.24    0.22
  19  -1   2    3.21    0.17
 -19   1  -2    3.14    0.31
  19   1   2    3.25    0.27
  19   1   2    3.35    0.22
  19   1   2    2.94    0.18
  19  -1  -2    3.43    0.27
 -19   1  -2    3.09    0.28
 -19   2   2    4.90    0.37
  19   2  -2    4.76    0.37
  19   2  -2    5.00    0.36
 -19  -2  -2    5.15    0.40
  19  -2   2    5.32    0.26
  19  -2   2    5.14    0.23
  19   2   2    5.61    0.32
  19  -2  -2    4.86    0.36
 -19   2  -2    4.18    0.34
  19   2   2    5.02    0.37
  19   2   2    5.33    0.30
 -19  -2   2    5.60    0.30
  19   2   2    5.18    0.32
 -19   3   2    0.42    0.16
  19   3  -2    0.69    0.19
  19   3  -2    0.60    0.17
 -19  -3  -2    0.52    0.18
 -19  -3   2    0.41    0.12
  19   3   2    0.50    0.12
  19   3   2    0.63    0.15
  19   3   2    0.45    0.18
 -19   3  -2    0.72    0.18
  19   3   2    0.62    0.16
  19   4  -2   37.05    1.52
 -19  -4  -2   37.14    1.62
 -19   4   2   36.81    1.48
  19   4  -2   36.42    1.41
  19   4  -2   36.92    1.49
  19   4   2   36.40    1.52
  19   4   2   37.42    1.42
 -19   4  -2   35.33    1.45
 -19  -4   2   35.10    1.44
  19   5  -2    2.88    0.34
 -19   5   2    2.28    0.31
  19   5  -2    3.47    0.40
  19   5  -2    2.97    0.39
 -19  -5  -2    3.20    0.39
 -19   5  -2    2.30    0.31
  19   5   2    3.34    0.42
  19   5   2    2.70    0.33
  19   6  -2   18.73    1.04
  19   6  -2   18.58    0.96
 -19  -6  -2   18.15    1.05
  19   6  -2   18.15    1.01
 -19   6   2   16.80    0.94
  19   6   2   16.86    1.02
 -19   6  -2   17.40    0.94
  19   6   2   17.16    0.94
  19   7  -2    0.14    0.25
  19   7  -2    0.39    0.26
 -19   7   2    0.11    0.20
  19   7  -2    0.03    0.26
  19   7   2    0.29    0.25
 -19   7  -2    0.38    0.25
  19   0   3    0.03    0.10
  19   0  -3    0.00    0.07
  19   0   3    0.04    0.09
  19   0  -3    0.02    0.08
 -19   0  -3    0.05    0.10
  19   1  -3    7.47    0.46
  19  -1   3    7.01    0.33
 -19   1   3    7.03    0.43
 -19  -1  -3    7.59    0.52
  19  -1   3    7.17    0.35
  19  -1  -3    7.89    0.41
 -19   1  -3    7.74    0.53
  19   1   3    7.11    0.38
  19   1   3    6.33    0.41
 -19   1  -3    6.81    0.44
 -19  -2  -3    1.27    0.24
  19   2  -3    1.18    0.21
 -19   2   3    1.16    0.20
  19   2   3    1.03    0.21
  19  -2  -3    1.17    0.19
 -19   2  -3    1.21    0.20
  19   2   3    1.36    0.20
  19   2   3    1.39    0.20
  19   3  -3   23.48    1.09
 -19  -3  -3   24.41    1.21
 -19   3   3   25.12    1.07
  19   3  -3   25.27    1.12
 -19  -3   3   26.88    0.95
  19   3   3   23.64    1.09
  19   3   3   27.41    1.01
 -19   3  -3   23.29    1.05
  19   3   3   24.46    1.02
 -19   4   3    2.47    0.31
 -19  -4  -3    1.95    0.33
  19   4  -3    2.82    0.35
  19   4  -3    2.32    0.33
 -19   4  -3    2.34    0.29
  19   4   3    2.51    0.30
  19   4   3    2.60    0.25
  19   4   3    2.60    0.36
 -19  -5  -3   15.84    0.95
  19   5  -3   16.58    0.91
  19   5  -3   14.85    0.88
 -19   5   3   15.16    0.83
  19   5  -3   16.75    0.85
  19   5   3   15.13    0.82
 -19   5  -3   15.02    0.81
 -19   6   3    1.80    0.32
  19   6  -3    2.55    0.41
  19   6  -3    2.76    0.44
  19   6  -3    3.10    0.41
 -19   6  -3    2.51    0.35
  19   6   3    2.45    0.37
 -19   7   3   11.44    0.79
  19   7  -3   11.75    0.88
  19   7  -3   12.91    0.85
  19   7  -3   12.94    0.91
  19   7   3   11.40    0.81
 -19   7  -3   12.64    0.81
  19   0   4   -0.04    0.09
 -19   0  -4    0.00    0.11
  19   0  -4    0.00    0.09
 -19  -1  -4    1.22    0.25
  19  -1   4    1.98    0.21
 -19   1   4    1.71    0.22
  19   1  -4    1.19    0.22
 -19   1  -4    1.47    0.27
  19  -1  -4    2.01    0.20
  19   1   4    1.58    0.20
 -19   2   4    9.28    0.54
 -19  -2  -4   10.56    0.68
  19   2  -4   10.58    0.61
  19   2   4    9.55    0.53
 -19   2  -4   10.09    0.55
  19   2   4    9.35    0.54
  19   3  -4    0.38    0.17
  19   3  -4    0.46    0.19
 -19   3   4    0.34    0.16
 -19  -3  -4    0.62    0.22
  19   3   4    0.35    0.15
 -19   3  -4    0.44    0.16
  19   3   4    0.27    0.16
 -19   4   4    8.07    0.53
  19   4  -4    7.53    0.56
 -19  -4  -4    7.24    0.60
  19   4  -4    6.45    0.54
  19   4   4    7.21    0.47
  19   4   4    8.57    0.56
 -19   4  -4    8.06    0.52
  19   5  -4    1.58    0.29
  19   5  -4    1.48    0.32
 -19   5   4    1.49    0.28
  19   5  -4    1.68    0.34
 -19   5  -4    1.37    0.26
  19   5   4    1.30    0.28
  19   6  -4   34.82    1.53
  19   6  -4   34.37    1.60
 -19   6   4   33.60    1.50
  19   6  -4   32.72    1.58
 -19   6  -4   34.63    1.48
  19   6   4   34.08    1.53
 -19   0  -5    0.03    0.13
  19   0   5    0.14    0.13
  19   0  -5    0.10    0.11
 -19   1   5    3.45    0.30
  19   1  -5    3.07    0.35
 -19  -1  -5    3.54    0.41
  19  -1   5    2.96    0.30
  19   1   5    3.31    0.31
 -19   1  -5    3.21    0.39
 -19  -2  -5    0.90    0.25
  19   2  -5    1.55    0.28
 -19   2   5    1.59    0.23
 -19   2  -5    1.30    0.21
  19   2   5    1.39    0.24
  19   2   5    1.17    0.22
  19   3  -5    7.91    0.58
 -19  -3  -5    7.73    0.63
 -19   3   5    8.76    0.53
  19   3  -5    7.10    0.56
  19   3   5    7.91    0.53
  19   3   5    8.16    0.54
 -19   3  -5    8.01    0.50
 -19   4   5    0.51    0.19
  19   4  -5    0.23    0.19
 -19  -4  -5    0.12    0.20
  19   4  -5    0.10    0.17
  19   4   5    0.28    0.17
  19   4   5   -0.03    0.17
 -19   4  -5    0.14    0.15
  19   5  -5   12.19    0.80
 -19   5   5   11.32    0.71
  19   5  -5   10.91    0.78
  19   5   5   12.67    0.76
 -19   5  -5   10.82    0.67
  19   6  -5    1.27    0.37
 -19   6   5    1.31    0.31
  19   6  -5    1.39    0.34
  19   6  -5    1.28    0.36
  19   6   5    1.15    0.34
 -19   6  -5    1.62    0.31
  19   0  -6    0.00    0.12
 -19   0  -6    0.10    0.16
  19   0   6   -0.15    0.12
 -19  -1  -6    2.22    0.37
  19   1  -6    2.22    0.31
  19   1   6    2.15    0.32
 -19   1  -6    1.79    0.33
  19   1   6    2.26    0.29
 -19  -2  -6    6.91    0.60
 -19   2   6    7.44    0.47
  19   2  -6    6.28    0.52
  19   2   6    7.13    0.53
  19   2   6    7.20    0.51
  19   3  -6    1.94    0.34
  19   3  -6    1.92    0.33
 -19   3   6    2.10    0.28
 -19   3  -6    2.07    0.26
  19   3   6    1.47    0.29
  19   3   6    1.56    0.29
  19   4  -6   14.79    0.91
 -19   4   6   16.55    0.85
  19   4  -6   17.38    0.98
  19   4   6   15.71    0.87
  19   4   6   16.16    0.89
 -19   4  -6   16.71    0.82
  19   5  -6    0.04    0.21
 -19   5   6    0.15    0.21
  19   5  -6    0.31    0.25
  19   5   6    0.09    0.21
 -19   5  -6    0.20    0.19
 -19   0  -7   -0.03    0.17
  19   0   7    0.38    0.20
  19   0  -7    0.12    0.16
  19   1  -7    4.79    0.48
  19   1   7    5.21    0.47
 -19   1  -7    5.12    0.56
  19   1   7    5.46    0.50
  19   2  -7    0.57    0.22
  19   2   7    0.29    0.19
  19   2   7    0.37    0.22
  19   3  -7    5.19    0.52
  19   3  -7    5.68    0.56
  19   3   7    5.68    0.53
  19   3   7    5.21    0.50
  19   4  -7    2.04    0.39
  19   4  -7    2.39    0.40
  19   4   7    2.38    0.39
  19   4   7    1.86    0.36
  19   5  -7    7.53    0.70
  19   5  -7    8.20    0.70
  19   5   7    8.07    0.69
  19   0  -8   -0.12    0.13
  19   0   8    0.02    0.20
  19   1  -8    0.60    0.25
  19   1   8    0.43    0.26
  19   1   8    0.39    0.23
  19   2  -8   10.19    0.74
  19   2   8   10.12    0.76
  19   2   8   11.71    0.75
  19   3  -8    0.22    0.22
  19   3   8    0.73    0.30
  19   3   8    0.55    0.27
  19   4  -8    1.18    0.37
  19   4  -8    1.71    0.39
  19   4   8    1.78    0.41
  19   4   8    1.86    0.39
  19   0   9    0.08    0.23
  19   0  -9    0.09    0.21
  19  -1   9    2.42    0.44
  19   1  -9    1.50    0.36
  19  -1  -9    1.93    0.38
  19   1   9    2.22    0.42
  19   2  -9   -0.14    0.20
  19   2   9    0.42    0.27
  20   0   0    8.49    0.45
  20   0   0    8.74    0.51
  20   0   0    8.83    0.40
 -20   0   0    8.41    0.49
  20  -1   0   84.60    3.05
  20   1   0   79.72    2.74
  20   1   0   82.70    2.65
 -20   1   0   80.16    2.78
  20   1   0   83.79    3.03
 -20  -1   0   77.53    2.99
 -20   2   0    1.07    0.20
  20   2   0    1.27    0.17
 -20  -2   0    1.16    0.18
  20   2   0    1.13    0.20
 -20   3   0   40.86    1.59
  20   3   0   40.64    1.46
  20   3   0   41.47    1.61
 -20  -3   0   42.42    1.66
  20   3   0   40.36    1.52
  20   4   0    1.07    0.21
  20   4   0    1.36    0.27
 -20  -4   0    1.21    0.22
  20   4   0    1.10    0.21
 -20   4   0    1.21    0.23
  20   5   0   17.87    0.89
  20   5   0   17.69    0.91
  20   5   0   16.51    0.96
 -20  -5   0   19.02    0.96
 -20   5   0   19.80    0.96
  20   6   0    2.23    0.40
  20   6   0    2.86    0.39
 -20  -6   0    2.41    0.36
  20   6   0    2.06    0.35
 -20   6   0    2.59    0.36
  20   7   0    1.09    0.35
 -20   7   0    0.84    0.26
  20   7   0    1.37    0.40
  20   7   0    1.11    0.32
  20   0  -1   60.99    2.24
  20   0   1   63.29    2.33
  20   0  -1   59.06    2.00
  20   0   1   56.34    2.01
 -20   0  -1   57.58    2.29
  20   0   1   58.92    1.90
 -20   1   1    1.96    0.24
  20   1  -1    1.90    0.23
  20  -1   1    1.60    0.17
  20   1  -1    1.94    0.20
  20   1  -1    1.99    0.21
  20  -1   1    1.83    0.14
 -20  -1  -1    1.98    0.24
  20   1   1    1.66    0.21
  20   1   1    2.04    0.17
 -20  -1   1    1.83    0.20
  20   1   1    1.90    0.25
  20  -1  -1    2.26    0.25
 -20   1  -1    2.09    0.24
  20   1   1    1.84    0.16
  20   2  -1   71.48    2.36
 -20  -2  -1   65.47    2.61
 -20   2   1   68.38    2.42
  20   2  -1   67.10    2.42
  20   2   1   67.40    2.28
  20   2   1   71.13    2.28
 -20  -2   1   68.61    2.54
  20   2   1   68.83    2.23
  20   2   1   67.95    2.41
  20  -2  -1   73.10    2.64
 -20   2  -1   68.80    2.42
  20   3  -1    0.74    0.18
  20   3  -1    0.36    0.16
 -20   3   1    0.45    0.16
 -20  -3  -1    0.49    0.16
 -20  -3   1    0.52    0.14
  20   3   1    0.53    0.14
  20   3   1    0.40    0.13
  20   3   1    0.55    0.19
 -20   3  -1    0.53    0.17
  20   4  -1   30.49    1.29
  20   4  -1   32.27    1.24
  20   4  -1   29.59    1.34
 -20  -4  -1   30.81    1.39
 -20   4   1   31.55    1.32
  20   4   1   30.42    1.34
  20   4   1   32.08    1.26
 -20   4  -1   30.58    1.30
  20   4   1   30.53    1.23
 -20  -4   1   31.72    1.32
  20   5  -1    3.66    0.43
  20   5  -1    2.72    0.33
 -20  -5  -1    3.10    0.38
  20   5  -1    3.26    0.38
 -20   5   1    3.69    0.40
 -20  -5   1    3.22    0.34
  20   5   1    3.05    0.35
  20   5   1    3.45    0.38
  20   5   1    2.84    0.39
 -20   5  -1    3.13    0.37
  20   6  -1    3.37    0.41
 -20   6   1    3.73    0.42
  20   6  -1    3.16    0.42
 -20  -6  -1    3.90    0.46
  20   6  -1    3.45    0.45
 -20   6  -1    3.81    0.42
  20   6   1    3.31    0.48
  20   6   1    2.92    0.40
  20   6   1    2.77    0.40
  20   7  -1    1.74    0.37
  20   7  -1    1.20    0.37
  20   7  -1    1.17    0.35
 -20   7   1    1.34    0.33
 -20   7  -1    0.98    0.31
  20   7   1    1.91    0.36
  20   7   1    1.23    0.37
  20   0  -2   35.99    1.33
  20   0   2   36.54    1.30
  20   0  -2   36.79    1.40
  20   0   2   36.19    1.17
 -20   0  -2   35.45    1.53
 -20   1   2   44.58    1.65
 -20  -1  -2   44.09    1.83
  20  -1   2   45.04    1.51
  20   1  -2   45.52    1.63
  20  -1  -2   45.69    1.73
  20   1   2   44.10    1.45
  20   1   2   44.95    1.61
 -20   1  -2   44.59    1.66
  20   1   2   43.95    1.47
 -20   1  -2   44.84    1.85
 -20  -2  -2    0.18    0.13
  20  -2   2    0.09    0.07
  20   2  -2    0.14    0.12
  20   2  -2    0.00    0.10
 -20   2   2    0.21    0.12
  20   2   2    0.21    0.10
 -20  -2   2    0.12    0.08
  20   2   2    0.10    0.09
  20  -2  -2    0.26    0.14
  20   2   2    0.07    0.10
 -20   2  -2    0.03    0.11
  20   2   2    0.03    0.11
  20   3  -2   52.87    2.01
 -20   3   2   54.50    2.04
  20   3  -2   53.68    2.07
 -20  -3  -2   56.55    2.26
  20   3   2   58.54    1.94
  20   3   2   54.70    2.06
  20   3   2   58.29    1.90
 -20  -3   2   56.96    2.07
  20   3   2   55.75    1.93
 -20   3  -2   54.64    2.03
 -20   4   2    2.76    0.33
  20   4  -2    3.05    0.37
  20   4  -2    2.81    0.34
 -20  -4  -2    3.04    0.37
  20   4  -2    2.69    0.31
 -20   4  -2    3.65    0.35
 -20  -4   2    2.92    0.26
  20   4   2    3.44    0.34
  20   4   2    2.86    0.37
  20   5  -2    2.13    0.36
 -20  -5  -2    2.31    0.35
  20   5  -2    2.05    0.33
  20   5  -2    2.27    0.31
 -20   5   2    2.51    0.33
  20   5   2    2.15    0.37
  20   5   2    2.10    0.31
 -20   5  -2    2.39    0.33
  20   6  -2    0.26    0.21
 -20   6   2    0.02    0.17
  20   6  -2    0.35    0.23
  20   6  -2    0.39    0.24
  20   6   2    0.33    0.21
 -20   6  -2    0.15    0.19
  20   6   2    0.51    0.27
  20   7  -2    4.29    0.56
 -20   7   2    3.60    0.46
  20   7  -2    3.53    0.48
  20   7  -2    3.21    0.48
  20   7   2    3.97    0.52
 -20   7  -2    3.66    0.45
  20   0  -3  115.12    3.68
  20   0   3  108.70    3.46
  20   0  -3  112.91    3.92
  20   0   3  108.01    3.58
 -20   0  -3  111.84    4.16
  20   1  -3    1.72    0.23
  20  -1   3    1.33    0.14
 -20  -1  -3    0.96    0.22
 -20   1   3    1.03    0.19
 -20   1  -3    1.25    0.24
 -20   1  -3    1.67    0.22
  20   1   3    1.83    0.23
  20   1   3    1.44    0.18
  20  -1  -3    1.51    0.19
  20   2  -3   64.55    2.28
  20   2  -3   63.71    2.31
 -20  -2  -3   61.27    2.53
 -20   2   3   62.10    2.25
  20   2   3   67.12    2.23
  20   2   3   62.15    2.25
 -20   2  -3   62.52    2.26
  20   2   3   63.75    2.14
  20  -2  -3   65.22    2.41
 -20   3   3    0.38    0.16
  20   3  -3    0.63    0.19
 -20  -3  -3    0.57    0.19
  20   3  -3    0.30    0.16
  20   3   3    0.49    0.14
  20   3   3    0.49    0.16
  20   3   3    0.47    0.18
 -20   3  -3    0.66    0.17
  20   4  -3   24.00    1.16
  20   4  -3   26.01    1.20
 -20  -4  -3   25.75    1.29
 -20   4   3   25.52    1.14
 -20   4  -3   26.07    1.13
  20   4   3   27.06    1.22
  20   4   3   24.76    1.10
  20   5  -3    1.93    0.30
  20   5  -3    1.45    0.31
  20   5  -3    1.34    0.32
 -20   5   3    1.66    0.29
 -20  -5  -3    1.53    0.33
  20   5   3    1.90    0.31
 -20   5  -3    1.44    0.27
 -20   6   3    4.86    0.49
  20   6  -3    4.79    0.50
  20   6  -3    4.78    0.53
  20   6  -3    5.46    0.56
 -20   6  -3    5.56    0.50
  20   6   3    4.61    0.51
 -20   7   3    0.05    0.22
  20   7  -3   -0.15    0.24
  20   7  -3    0.28    0.27
  20   7  -3    0.34    0.27
 -20   7  -3    0.21    0.23
  20   7   3    0.30    0.28
 -20   0  -4    9.65    0.64
  20   0  -4    9.35    0.55
  20   0   4    9.40    0.47
  20   1  -4   35.42    1.45
 -20  -1  -4   35.89    1.64
 -20   1   4   37.69    1.41
  20   1   4   36.95    1.33
 -20   1  -4   38.06    1.66
 -20  -2  -4    5.01    0.46
 -20   2   4    5.02    0.37
  20   2  -4    4.05    0.38
 -20   2  -4    4.72    0.36
  20   2   4    5.17    0.37
  20   2   4    4.68    0.37
  20   3  -4    8.52    0.59
 -20   3   4    9.24    0.56
 -20  -3  -4    9.03    0.66
  20   3  -4   10.46    0.64
 -20   3  -4    9.68    0.56
  20   3   4    9.28    0.56
  20   3   4    9.68    0.54
  20   4  -4    0.79    0.25
 -20   4   4    1.04    0.23
  20   4  -4    0.80    0.25
 -20  -4  -4    0.90    0.29
  20   4   4    0.81    0.19
  20   4   4    1.16    0.25
 -20   4  -4    1.03    0.22
 -20   5   4   13.87    0.82
  20   5  -4   14.94    0.90
  20   5  -4   15.26    0.91
  20   5  -4   15.97    0.87
 -20   5  -4   15.39    0.81
  20   5   4   14.31    0.84
 -20   6   4    0.66    0.25
  20   6  -4    0.33    0.24
  20   6  -4    0.88    0.30
  20   6  -4    0.67    0.29
 -20   6  -4    0.48    0.22
  20   6   4    0.60    0.27
  20   0  -5   60.05    2.29
  20   0   5   62.99    2.16
 -20   0  -5   67.84    2.64
 -20  -1  -5    3.97    0.44
 -20   1   5    3.36    0.31
  20   1  -5    3.21    0.36
  20   1   5    3.08    0.31
 -20   1  -5    3.53    0.42
 -20  -2  -5   36.62    1.67
 -20   2   5   34.52    1.38
  20   2  -5   35.20    1.49
  20   2   5   36.18    1.45
  20   2   5   33.95    1.37
 -20   2  -5   34.89    1.36
 -20   3   5    6.62    0.46
 -20  -3  -5    5.48    0.54
  20   3  -5    6.33    0.52
  20   3  -5    5.73    0.50
  20   3   5    6.38    0.48
 -20   3  -5    6.15    0.43
  20   3   5    5.35    0.45
 -20   4   5   15.85    0.82
  20   4  -5   16.89    0.92
  20   4  -5   14.48    0.89
  20   4   5   15.84    0.84
 -20   4  -5   15.43    0.79
  20   4   5   14.56    0.79
  20   5  -5    0.16    0.22
 -20   5   5    0.19    0.18
  20   5  -5    0.18    0.21
  20   5   5   -0.17    0.20
 -20   5  -5    0.19    0.18
 -20   6   5    3.81    0.44
  20   6  -5    2.35    0.46
  20   6  -5    3.06    0.44
  20   6  -5    2.93    0.47
 -20   6  -5    3.17    0.40
  20   6   5    3.04    0.45
  20   0  -6    1.31    0.26
  20   0   6    1.97    0.27
 -20   0  -6    2.00    0.34
  20   1  -6   20.76    1.03
 -20  -1  -6   21.54    1.18
  20   1   6   21.21    0.96
 -20   1  -6   21.58    1.17
  20   1   6   20.71    1.03
 -20   2   6    0.69    0.18
  20   2  -6    0.92    0.25
 -20  -2  -6    0.61    0.25
  20   2   6    0.70    0.23
  20   2   6    0.67    0.22
  20   3  -6   21.18    1.06
  20   3  -6   19.12    1.05
 -20   3   6   20.46    0.94
  20   3   6   20.14    1.00
  20   3   6   19.05    1.00
 -20   3  -6   19.96    0.90
 -20   4   6    0.02    0.17
  20   4  -6    0.21    0.21
  20   4  -6    0.36    0.23
  20   4   6    0.20    0.22
 -20   4  -6    0.14    0.17
  20   4   6    0.18    0.21
  20   5  -6    2.87    0.46
 -20   5   6    3.55    0.42
  20   5  -6    3.05    0.47
  20   5   6    3.46    0.48
  20   0  -7   13.46    0.79
  20   1  -7    4.61    0.47
  20   1   7    4.37    0.47
  20   1   7    5.09    0.45
  20   2  -7   18.02    1.01
  20   2   7   19.06    1.01
  20   2   7   19.27    0.97
  20   3  -7    0.30    0.20
  20   3  -7    0.05    0.18
  20   3   7    0.11    0.21
  20   3   7    0.14    0.23
  20   4  -7    5.75    0.59
  20   4  -7    5.96    0.62
  20   4   7    6.59    0.58
  20   4   7    6.22    0.59
  20   0   8    1.36    0.32
  20   0  -8    1.11    0.30
  20   1  -8   15.51    0.93
  20   1   8   15.48    0.88
  20   1   8   14.94    0.93
  20   2  -8    0.09    0.18
  20   2   8    0.31    0.23
  20   2   8   -0.25    0.20
  20   3  -8    5.21    0.58
  20   3  -8    5.79    0.59
  20   3   8    6.80    0.62
  20   3   8    5.25    0.57
  20   0   9    9.89    0.78
  20   0  -9   10.40    0.76
  20  -1   9    1.01    0.33
  20   1  -9    1.42    0.36
  20  -1  -9    0.94    0.30
  20   1   9    0.72    0.31
 -21   0   0    0.08    0.09
  21   0   0    0.15    0.12
  21   0   0    0.06    0.07
  21   0   0    0.10    0.07
  21   1   0    8.19    0.49
  21   1   0    7.67    0.39
  21   1   0    7.47    0.45
  21  -1   0    8.09    0.50
 -21  -1   0    7.66    0.46
 -21   1   0    8.02    0.48
 -21   2   0   11.77    0.63
  21   2   0   11.84    0.62
  21   2   0   11.80    0.56
 -21  -2   0   11.55    0.61
  21   3   0    1.98    0.29
 -21  -3   0    2.56    0.26
 -21   3   0    2.13    0.28
  21   3   0    2.35    0.24
  21   3   0    2.33    0.26
  21   4   0   17.35    0.90
  21   4   0   17.02    0.80
 -21   4   0   16.46    0.85
  21   4   0   16.63    0.82
 -21  -4   0   17.59    0.87
  21   5   0    3.50    0.37
  21   5   0    3.53    0.38
 -21   5   0    3.40    0.39
  21   5   0    2.83    0.39
 -21  -5   0    2.92    0.35
  21   6   0   17.11    0.91
  21   6   0   15.14    0.96
  21   6   0   15.00    0.90
 -21  -6   0   16.32    0.92
 -21   6   0   15.13    0.89
  21   7   0    4.25    0.56
  21   7   0    3.57    0.48
 -21   7   0    4.34    0.50
  21   7   0    3.16    0.49
  21   0  -1    0.13    0.08
  21   0   1    0.26    0.13
 -21   0  -1    0.28    0.12
  21   0  -1    0.42    0.12
  21   0   1    0.18    0.07
 -21   1   1    2.56    0.28
  21   1  -1    2.50    0.25
  21  -1   1    3.08    0.23
  21   1  -1    2.77    0.24
  21  -1   1    2.81    0.17
  21   1  -1    2.40    0.26
 -21  -1  -1    2.25    0.27
 -21  -1   1    3.56    0.26
  21   1   1    2.75    0.20
  21   1   1    3.25    0.20
 -21   1  -1    2.50    0.27
  21   1   1    2.53    0.25
  21  -1  -1    2.48    0.27
  21   1   1    3.38    0.34
  21   2  -1    0.51    0.15
 -21  -2  -1    0.78    0.18
  21   2  -1    0.57    0.16
 -21   2   1    0.63    0.17
  21   2   1    0.53    0.13
  21   2   1    0.46    0.16
  21   2   1    0.55    0.13
 -21   2  -1    0.64    0.17
 -21  -2   1    0.54    0.13
  21   3  -1   10.84    0.58
 -21  -3  -1   10.07    0.61
 -21   3   1    9.75    0.59
  21   3  -1   10.87    0.63
  21   3   1   10.06    0.61
 -21   3  -1   10.05    0.59
  21   3   1   10.53    0.53
 -21  -3   1    9.73    0.53
  21   3   1    9.53    0.52
  21   4  -1    8.02    0.54
  21   4  -1    7.47    0.56
 -21  -4  -1    7.94    0.56
  21   4  -1    8.24    0.51
 -21   4   1    8.48    0.55
 -21   4  -1    8.06    0.55
  21   4   1    8.27    0.51
  21   4   1    7.78    0.50
 -21  -4   1    8.65    0.51
  21   4   1    8.79    0.59
  21   5  -1   24.36    1.08
 -21   5   1   22.97    1.12
  21   5  -1   23.03    1.11
 -21  -5  -1   23.93    1.19
 -21   5  -1   22.91    1.12
  21   5   1   24.68    1.09
  21   5   1   22.90    1.17
  21   5   1   24.98    1.11
 -21  -5   1   22.80    1.10
  21   6  -1    0.95    0.33
  21   6  -1    1.09    0.29
 -21  -6  -1    1.13    0.29
 -21   6   1    0.73    0.25
  21   6  -1    0.82    0.28
  21   6   1    0.11    0.25
  21   6   1    0.56    0.25
  21   6   1    1.30    0.31
 -21   6  -1    1.19    0.28
  21   7  -1   17.99    1.05
 -21   7   1   19.54    1.08
  21   7  -1   19.11    1.16
  21   7  -1   19.13    1.11
  21   7   1   18.55    1.07
 -21   7  -1   21.99    1.12
  21   7   1   17.74    1.15
  21   0  -2    0.11    0.09
 -21   0  -2   -0.01    0.09
  21   0   2    0.12    0.09
  21   0   2   -0.02    0.07
  21   0  -2    0.11    0.10
  21  -1   2    9.59    0.42
  21   1  -2    9.20    0.50
 -21  -1  -2    8.45    0.55
 -21   1   2    7.99    0.49
  21   1   2    8.18    0.47
 -21   1  -2    8.41    0.56
 -21   1  -2    9.09    0.52
  21   1   2    8.51    0.36
  21   1   2    8.09    0.40
  21  -1  -2    9.29    0.50
 -21   2   2    2.64    0.29
 -21  -2  -2    2.81    0.32
  21   2  -2    2.97    0.31
  21  -2   2    3.13    0.20
  21   2  -2    3.36    0.30
  21   2   2    2.19    0.27
  21   2   2    2.97    0.25
  21  -2  -2    2.78    0.30
 -21   2  -2    2.72    0.30
  21   2   2    3.23    0.26
 -21  -2   2    2.88    0.21
  21   2   2    2.98    0.23
 -21   3   2    0.29    0.15
  21   3  -2    0.31    0.16
 -21  -3  -2    0.14    0.14
  21   3  -2    0.18    0.13
  21   3   2   -0.09    0.10
 -21  -3   2   -0.04    0.09
  21   3   2    0.26    0.16
  21   3   2    0.04    0.11
  21   3   2    0.13    0.12
 -21   3  -2    0.00    0.12
  21   4  -2   39.32    1.48
  21   4  -2   36.60    1.54
  21   4  -2   37.24    1.59
 -21   4   2   38.13    1.55
 -21  -4  -2   39.15    1.70
  21   4   2   39.24    1.61
 -21   4  -2   37.07    1.53
  21   4   2   37.80    1.47
  21   5  -2    1.13    0.29
  21   5  -2    0.62    0.23
  21   5  -2    0.95    0.24
 -21  -5  -2    0.91    0.25
 -21   5   2    0.87    0.23
  21   5   2    1.39    0.27
  21   5   2    0.82    0.30
 -21   5  -2    1.73    0.29
  21   6  -2    5.72    0.58
 -21   6   2    4.66    0.49
  21   6  -2    5.68    0.52
  21   6  -2    4.52    0.52
  21   6   2    4.28    0.54
 -21   6  -2    4.79    0.48
  21   6   2    5.05    0.51
 -21   7   2    3.33    0.45
  21   7  -2    3.27    0.49
  21   7  -2    3.73    0.50
  21   7  -2    3.07    0.52
  21   7   2    3.39    0.48
 -21   7  -2    3.94    0.48
  21   0  -3    0.04    0.08
 -21   0  -3    0.04    0.12
  21   0  -3    0.06    0.09
  21   0   3    0.04    0.08
  21   0   3    0.05    0.10
 -21  -1  -3    2.23    0.30
  21  -1   3    2.08    0.19
 -21   1   3    2.19    0.26
  21   1  -3    2.37    0.27
 -21   1  -3    2.45    0.27
  21  -1  -3    2.66    0.24
  21   1   3    2.20    0.22
 -21   1  -3    2.10    0.30
  21   1   3    2.19    0.24
 -21  -2  -3    1.83    0.29
  21   2  -3    1.78    0.27
  21   2  -3    1.96    0.26
 -21   2   3    1.83    0.24
  21  -2  -3    1.74    0.24
  21   2   3    2.31    0.24
  21   2   3    1.74    0.26
  21   2   3    1.82    0.22
 -21   2  -3    1.81    0.25
 -21  -3  -3    7.89    0.59
  21   3  -3    8.76    0.59
 -21   3   3    8.89    0.55
  21   3  -3    8.49    0.56
  21   3   3    8.66    0.57
  21   3   3    9.08    0.47
 -21   3  -3    8.38    0.53
  21   3   3    9.02    0.52
 -21  -4  -3    1.78    0.32
  21   4  -3    1.59    0.30
  21   4  -3    1.88    0.31
 -21   4   3    1.21    0.25
 -21   4  -3    1.48    0.26
  21   4   3    1.50    0.26
  21   4   3    1.04    0.27
 -21   5   3   18.07    0.95
 -21  -5  -3   19.57    1.09
  21   5  -3   17.93    1.02
  21   5  -3   19.86    1.03
  21   5  -3   18.58    0.95
  21   5   3   18.04    0.95
 -21   5  -3   18.09    0.94
  21   6  -3    1.83    0.35
  21   6  -3    2.49    0.41
  21   6  -3    2.09    0.42
 -21   6   3    2.56    0.37
  21   6   3    2.48    0.39
 -21   6  -3    2.76    0.37
  21   0  -4   -0.05    0.09
 -21   0  -4    0.18    0.15
  21   1  -4    0.74    0.20
 -21  -1  -4    1.30    0.26
 -21   1   4    0.72    0.17
 -21   1  -4    0.99    0.24
  21   1   4    1.27    0.19
 -21  -2  -4    7.63    0.58
  21   2  -4    7.06    0.51
 -21   2   4    7.97    0.50
  21   2   4    6.94    0.45
 -21   2  -4    7.44    0.47
  21   2   4    7.62    0.48
  21   3  -4    1.98    0.32
 -21   3   4    2.29    0.29
 -21  -3  -4    2.78    0.38
  21   3  -4    2.20    0.32
 -21   3  -4    2.41    0.30
  21   3   4    2.29    0.27
  21   3   4    2.15    0.29
 -21  -4  -4    9.23    0.70
  21   4  -4    8.68    0.63
  21   4  -4    8.74    0.64
 -21   4   4    9.44    0.61
  21   4   4   10.65    0.64
 -21   4  -4   10.31    0.61
  21   5  -4    0.35    0.21
  21   5  -4    0.70    0.26
  21   5  -4    0.48    0.25
 -21   5   4    0.69    0.22
 -21   5  -4    0.39    0.21
  21   5   4    0.18    0.19
  21   6  -4   17.92    0.98
  21   6  -4   16.04    1.00
 -21   6   4   15.84    0.92
  21   6  -4   17.32    1.03
  21   6   4   14.78    0.93
 -21   6  -4   16.68    0.92
  21   0  -5    0.04    0.11
 -21   0  -5    0.12    0.15
  21   1  -5    2.28    0.32
 -21   1   5    2.98    0.29
 -21  -1  -5    2.55    0.37
 -21   1  -5    2.71    0.38
  21   1   5    2.82    0.30
 -21  -2  -5    0.29    0.20
  21   2  -5    0.41    0.18
 -21   2   5    0.38    0.16
 -21   2  -5    0.52    0.17
  21   2   5    0.52    0.19
  21   2   5    0.63    0.20
  21   3  -5    8.08    0.60
 -21   3   5    7.40    0.51
  21   3  -5    7.88    0.58
 -21  -3  -5    8.05    0.64
 -21   3  -5    7.88    0.51
  21   3   5    6.00    0.48
  21   3   5    7.72    0.52
  21   4  -5    2.05    0.35
  21   4  -5    0.98    0.28
 -21   4   5    1.86    0.30
  21   4   5    1.67    0.31
 -21   4  -5    1.91    0.28
  21   4   5    1.66    0.28
 -21   5   5   12.24    0.75
  21   5  -5   11.92    0.82
  21   5  -5   10.84    0.80
 -21   5  -5   12.04    0.72
  21   5   5   12.78    0.80
  21   6  -5    1.44    0.39
 -21   6   5    1.69    0.34
  21   6  -5    1.43    0.40
  21   6  -5    1.88    0.40
  21   6   5    1.08    0.35
 -21   6  -5    2.43    0.36
 -21   0  -6    0.06    0.16
  21   0  -6   -0.16    0.10
 -21  -1  -6    1.65    0.34
  21   1  -6    1.12    0.26
  21   1   6    2.24    0.29
 -21   1  -6    2.15    0.36
  21   1   6    2.07    0.32
 -21   2   6    1.03    0.22
 -21  -2  -6    0.58    0.24
  21   2  -6    0.90    0.25
  21   2   6    0.90    0.25
  21   2   6    1.14    0.25
 -21   3   6    0.61    0.21
  21   3  -6    1.20    0.29
  21   3  -6    0.53    0.24
 -21   3  -6    0.88    0.21
  21   3   6    1.05    0.27
  21   3   6    1.04    0.28
  21   4  -6   13.51    0.86
 -21   4   6   13.35    0.76
  21   4  -6   12.89    0.86
 -21   4  -6   13.31    0.73
  21   4   6   12.75    0.79
  21   4   6   13.49    0.79
 -21   5   6    1.33    0.31
  21   5  -6    0.43    0.26
  21   5  -6    0.80    0.33
  21   5   6    1.06    0.32
  21   0  -7    0.05    0.15
  21   1  -7    1.01    0.28
  21   1   7    1.01    0.26
  21   1   7    1.27    0.31
  21   2  -7    1.44    0.31
  21   2   7    1.51    0.30
  21   2   7    1.68    0.33
  21   3  -7    5.40    0.55
  21   3  -7    5.75    0.58
  21   3   7    6.09    0.56
  21   3   7    6.09    0.55
  21   4  -7    0.04    0.24
  21   4  -7    0.44    0.27
  21   4   7    0.13    0.24
  21   4   7    0.13    0.24
  21   0  -8   -0.02    0.18
  21   0   8   -0.02    0.20
  21   1  -8    0.48    0.24
  21   1   8    0.80    0.29
  21   1   8    0.52    0.27
  21  -1  -8    0.30    0.21
  21   2  -8    1.26    0.33
  21   2   8    0.79    0.30
  21   2   8    1.19    0.34
  21   3  -8    0.21    0.23
  21   3  -8    1.10    0.34
  21   3   8    0.57    0.29
  21   3   8    0.79    0.33
  21   0   9   -0.10    0.23
  21   0  -9    0.00    0.19
  21  -1   9    2.27    0.45
  21   1  -9    2.24    0.40
  21   1   9    2.83    0.47
  21  -1  -9    2.61    0.43
  22   0   0   18.44    0.82
 -22   0   0   19.32    0.91
  22   0   0   21.28    0.95
  22   0   0   20.06    0.76
  22   1   0   30.79    1.24
  22  -1   0   32.09    1.37
 -22  -1   0   31.03    1.32
  22   1   0   31.46    1.15
  22   1   0   34.19    1.37
  22  -1   0   31.28    1.12
 -22   1   0   32.53    1.29
  22   2   0   21.25    0.79
 -22  -2   0   20.78    0.93
 -22   2   0   19.36    0.91
  22   2   0   19.35    0.90
  22   2   0   19.83    0.83
  22   3   0   12.93    0.60
  22   3   0   10.73    0.66
 -22  -3   0   12.02    0.65
  22   3   0   12.88    0.63
 -22   3   0   12.35    0.68
  22   4   0    2.15    0.32
 -22  -4   0    1.97    0.28
  22   4   0    2.27    0.28
  22   4   0    1.68    0.26
 -22   4   0    1.86    0.28
 -22   5   0   15.38    0.84
  22   5   0   13.92    0.86
  22   5   0   14.74    0.78
 -22  -5   0   14.56    0.82
  22   5   0   13.73    0.79
  22   6   0    1.25    0.30
  22   6   0    1.78    0.34
  22   6   0    0.95    0.34
 -22   6   0    2.35    0.36
  22   7   0   -0.04    0.24
  22   7   0    0.25    0.28
 -22   7   0    0.17    0.22
  22   7   0    0.38    0.29
  22   0  -1  100.40    3.33
  22   0   1  101.76    3.36
  22   0  -1  105.48    3.73
 -22   0  -1  100.47    3.79
  22   0   1  103.75    3.22
  22   1  -1   56.08    2.08
  22   1  -1   53.59    1.96
 -22  -1  -1   52.02    2.13
  22   1  -1   54.21    1.88
  22  -1   1   54.54    1.86
 -22   1   1   54.05    1.98
  22  -1   1   53.72    1.75
 -22  -1   1   55.85    2.06
  22   1   1   53.22    1.79
  22  -1  -1   55.74    2.11
  22   1   1   56.13    1.74
  22   1   1   52.57    1.92
 -22   1  -1   53.60    1.98
  22   2  -1   31.81    1.31
  22   2  -1   33.32    1.25
 -22   2   1   30.39    1.29
 -22  -2  -1   32.55    1.39
  22   2   1   32.71    1.30
  22   2   1   32.05    1.18
 -22   2  -1   32.91    1.32
  22   2   1   33.75    1.16
 -22  -2   1   32.16    1.31
 -22   3   1   24.02    1.07
 -22  -3  -1   23.60    1.12
  22   3  -1   24.54    1.03
  22   3  -1   23.52    1.08
 -22   3  -1   24.27    1.08
  22   3   1   23.75    0.98
  22   3   1   24.97    0.98
 -22  -3   1   24.14    1.04
  22   3   1   24.48    1.10
  22   4  -1   13.53    0.75
 -22   4   1   14.44    0.79
 -22  -4  -1   15.13    0.83
  22   4  -1   15.30    0.74
  22   4  -1   13.77    0.82
  22   4   1   16.15    0.76
 -22   4  -1   14.99    0.80
 -22  -4   1   15.14    0.75
  22   4   1   14.66    0.74
  22   4   1   13.66    0.80
 -22   5   1    5.32    0.47
 -22  -5  -1    6.32    0.52
  22   5  -1    5.83    0.55
  22   5  -1    5.33    0.47
  22   5  -1    6.01    0.48
 -22   5  -1    5.43    0.48
  22   5   1    5.72    0.47
  22   5   1    6.35    0.55
  22   5   1    5.73    0.47
  22   6  -1    1.81    0.32
  22   6  -1    1.80    0.35
  22   6  -1    1.04    0.33
 -22  -6  -1    1.16    0.32
 -22   6   1    1.52    0.32
  22   6   1    1.73    0.38
  22   6   1    1.59    0.32
  22   6   1    1.14    0.31
 -22   6  -1    1.56    0.32
  22   7  -1    1.79    0.39
  22   7  -1    1.25    0.41
 -22   7   1    1.33    0.34
  22   7  -1    1.53    0.39
  22   7   1    1.96    0.40
 -22   7  -1    1.64    0.35
  22   7   1    1.42    0.42
  22   0  -2    2.09    0.24
  22   0  -2    2.30    0.23
 -22   0  -2    3.01    0.33
  22  -1   2   26.70    0.97
 -22  -1  -2   26.30    1.21
 -22   1   2   26.04    1.10
  22   1  -2   27.75    1.08
  22   1   2   25.00    0.89
 -22   1  -2   26.37    1.23
  22  -1  -2   27.37    1.13
  22   1   2   25.65    1.05
  22   1   2   25.88    0.94
 -22  -2  -2    8.64    0.58
  22  -2   2    9.13    0.41
  22   2  -2    9.24    0.53
  22   2  -2    8.07    0.54
 -22   2   2    8.98    0.54
  22   2   2    8.80    0.54
  22   2   2    9.22    0.46
  22   2   2    8.98    0.43
 -22   2  -2    8.46    0.54
 -22  -2   2    9.51    0.45
  22   2   2    9.17    0.46
  22   3  -2   34.33    1.37
 -22   3   2   32.08    1.37
  22   3  -2   34.56    1.43
 -22  -3  -2   34.24    1.52
 -22  -3   2   34.93    1.34
 -22   3  -2   35.38    1.40
  22   3   2   34.07    1.27
  22   3   2   29.88    1.36
  22   3   2   35.29    1.29
 -22   4   2    6.74    0.50
 -22  -4  -2    6.42    0.53
  22   4  -2    6.35    0.52
  22   4  -2    6.51    0.46
  22   4  -2    6.72    0.51
  22   4   2    6.66    0.47
 -22   4  -2    6.33    0.49
  22   4   2    6.63    0.55
 -22   5   2    3.49    0.39
  22   5  -2    2.85    0.38
  22   5  -2    2.49    0.38
 -22  -5  -2    3.03    0.41
  22   5  -2    3.07    0.37
 -22   5  -2    3.24    0.37
  22   5   2    3.68    0.45
  22   5   2    3.69    0.40
  22   6  -2    5.48    0.52
  22   6  -2    4.70    0.55
  22   6  -2    5.54    0.57
 -22   6   2    4.97    0.50
  22   6   2    5.28    0.59
  22   6   2    5.05    0.52
 -22   6  -2    4.89    0.49
  22   7  -2    2.53    0.45
  22   7   2    2.23    0.41
 -22   0  -3   25.68    1.26
  22   0  -3   26.10    1.10
  22   0  -3   27.91    1.08
  22   0   3   28.48    1.04
  22   1  -3   17.07    0.81
 -22   1   3   18.03    0.82
  22  -1   3   17.49    0.67
 -22  -1  -3   16.32    0.91
  22   1   3   16.95    0.77
 -22   1  -3   16.74    0.81
 -22   1  -3   17.54    0.93
  22   1   3   17.20    0.71
  22  -1  -3   17.72    0.79
  22   2  -3   29.00    1.19
 -22   2   3   29.32    1.19
  22   2  -3   25.54    1.19
 -22  -2  -3   26.42    1.31
  22   2   3   27.71    1.17
  22   2   3   27.50    1.08
 -22   2  -3   26.04    1.15
  22   2   3   30.58    1.13
  22  -2  -3   29.09    1.21
  22   3  -3   12.67    0.74
 -22   3   3   11.29    0.66
 -22  -3  -3   12.37    0.77
  22   3  -3   12.95    0.71
 -22   3  -3   12.16    0.67
  22   3   3   11.92    0.58
  22   3   3   12.98    0.65
  22   3   3   11.60    0.70
 -22  -4  -3   12.82    0.82
  22   4  -3   12.52    0.75
 -22   4   3   12.14    0.72
  22   4  -3   12.84    0.77
  22   4   3   12.11    0.77
  22   4   3   13.12    0.71
 -22   4  -3   13.01    0.72
  22   5  -3    3.29    0.45
  22   5  -3    3.34    0.43
 -22   5   3    3.31    0.39
 -22  -5  -3    3.24    0.43
  22   5  -3    2.44    0.35
 -22   5  -3    3.20    0.38
  22   5   3    3.31    0.39
  22   5   3    3.16    0.44
  22   6  -3    0.60    0.31
  22   6  -3    1.58    0.36
  22   6  -3    1.25    0.31
 -22   6   3    1.63    0.34
 -22   6  -3    1.91    0.34
  22   6   3    1.48    0.34
 -22   0  -4    1.79    0.30
  22   0  -4    1.03    0.22
 -22   1   4   30.11    1.20
  22   1  -4   28.53    1.23
 -22  -1  -4   29.74    1.41
 -22   1  -4   28.97    1.40
  22   1   4   28.40    1.15
  22   2  -4   22.20    1.03
 -22   2   4   22.68    0.99
 -22  -2  -4   21.15    1.14
  22   2   4   22.03    0.97
  22   2   4   21.13    0.97
  22   2   4   21.29    0.92
 -22   2  -4   21.73    0.97
 -22   3   4   14.77    0.78
  22   3  -4   14.25    0.84
  22   3  -4   14.47    0.82
 -22  -3  -4   15.82    0.93
 -22   3  -4   15.64    0.79
  22   3   4   14.81    0.76
  22   3   4   15.54    0.74
 -22  -4  -4    5.02    0.54
  22   4  -4    4.98    0.49
 -22   4   4    5.30    0.44
  22   4  -4    5.08    0.51
 -22   4  -4    4.64    0.41
  22   4   4    4.80    0.45
  22   5  -4    7.48    0.63
 -22   5   4    9.04    0.61
  22   5  -4    8.16    0.67
  22   5  -4    8.59    0.63
 -22   5  -4    8.28    0.58
  22   5   4    8.10    0.62
  22   6  -4    3.41    0.45
  22   6  -4    2.99    0.48
 -22   6   4    3.33    0.43
  22   6  -4    3.74    0.51
  22   6   4    2.77    0.44
 -22   6  -4    2.70    0.39
 -22   0  -5   14.48    0.89
  22   0  -5   14.26    0.76
 -22   1   5    6.84    0.45
 -22  -1  -5    6.75    0.58
  22   1  -5    6.72    0.50
 -22   1  -5    6.91    0.57
  22   2  -5   20.71    1.02
 -22  -2  -5   21.20    1.16
 -22   2   5   20.96    0.95
  22   2   5   19.30    0.92
  22   2   5   20.86    0.98
 -22   2  -5   20.46    0.93
 -22   3   5   14.83    0.77
  22   3  -5   13.12    0.81
 -22  -3  -5   13.31    0.90
  22   3  -5   14.29    0.84
  22   3   5   14.97    0.78
 -22   3  -5   13.77    0.73
  22   3   5   14.18    0.76
  22   4  -5    9.80    0.69
  22   4  -5    8.51    0.66
 -22   4   5    9.16    0.61
 -22   4  -5    8.35    0.57
  22   4   5    8.81    0.61
  22   5  -5    3.84    0.50
  22   5  -5    3.73    0.49
 -22   5   5    3.24    0.41
  22   5   5    3.94    0.49
 -22   5  -5    3.15    0.38
 -22   0  -6   11.75    0.80
  22   0  -6    9.74    0.64
 -22  -1  -6   13.14    0.87
  22   1  -6   11.88    0.74
 -22   1  -6   12.42    0.85
  22   1   6   12.33    0.75
 -22   2   6    3.11    0.33
  22   2  -6    2.29    0.35
  22   2   6    3.03    0.38
  22   2   6    2.56    0.35
 -22   3   6   14.28    0.77
  22   3  -6   13.94    0.86
  22   3  -6   13.53    0.84
  22   3   6   12.95    0.79
  22   3   6   14.21    0.82
 -22   3  -6   14.03    0.73
  22   4  -6    2.24    0.41
  22   4  -6    3.40    0.46
 -22   4   6    3.59    0.40
  22   4   6    2.55    0.40
 -22   4  -6    4.19    0.40
  22   5  -6    1.08    0.35
 -22   5   6    0.89    0.28
  22   5  -6    0.29    0.29
  22   5   6    1.47    0.37
  22   0  -7   11.88    0.75
  22   1  -7    7.53    0.61
  22   1   7    8.71    0.64
  22   2  -7   11.50    0.78
  22   2   7   13.06    0.81
  22   2   7   12.54    0.77
  22   3  -7    4.38    0.51
  22   3  -7    4.06    0.50
  22   3   7    3.65    0.44
  22   3   7    4.53    0.49
  22   4  -7    2.83    0.46
  22   4  -7    3.85    0.51
  22   4   7    3.30    0.47
  22   4   7    3.82    0.49
  22   0   8    5.09    0.54
  22   0  -8    4.08    0.49
  22   1  -8   10.35    0.73
  22  -1  -8    7.94    0.66
  22   1   8   11.05    0.77
  22   2  -8    2.23    0.40
  22   2   8    2.16    0.40
  22   2   8    2.32    0.41
  22   3  -8    2.04    0.40
  22   3  -8    1.05    0.33
  22   3   8    1.65    0.38
  22   3   8    2.25    0.42
  23   0   0    0.09    0.09
  23   0   0    0.40    0.16
 -23   0   0    0.36    0.14
  23   0   0    0.21    0.09
 -23   1   0    0.10    0.12
 -23  -1   0    0.03    0.09
  23   1   0    0.22    0.10
  23   1   0    0.07    0.10
  23  -1   0    0.16    0.08
  23   1   0    0.23    0.14
  23   2   0    6.04    0.37
  23   2   0    6.07    0.43
  23   2   0    5.56    0.33
 -23  -2   0    5.74    0.41
 -23   2   0    5.43    0.43
 -23  -3   0   10.30    0.60
  23   3   0   11.29    0.56
  23   3   0   10.45    0.57
 -23   3   0   10.20    0.62
  23   3   0   10.62    0.65
  23   4   0    1.50    0.25
 -23  -4   0    1.45    0.25
  23   4   0    1.81    0.32
 -23   4   0    1.82    0.29
  23   4   0    1.93    0.27
  23   5   0   13.97    0.77
  23   5   0   14.42    0.80
 -23  -5   0   13.80    0.79
 -23   5   0   13.69    0.80
  23   5   0   12.73    0.83
 -23   6   0   29.53    1.41
  23   6   0   31.49    1.43
  23   6   0   29.15    1.48
  23   6   0   31.53    1.39
  23   7   0    4.28    0.53
  23   7   0    4.76    0.55
  23   7   0    4.42    0.61
 -23   7   0    4.02    0.51
  23   0  -1    0.38    0.11
 -23   0  -1    0.36    0.14
  23   0  -1    0.53    0.16
 -23  -1  -1    1.71    0.25
  23  -1   1    2.11    0.15
  23   1  -1    1.73    0.23
  23  -1   1    1.77    0.20
  23   1  -1    1.43    0.22
  23   1  -1    1.69    0.20
 -23   1   1    1.64    0.24
  23  -1  -1    1.93    0.25
  23   1   1    2.00    0.24
  23   1   1    2.08    0.18
 -23  -1   1    1.81    0.21
 -23   1  -1    1.60    0.24
  23   2  -1    0.21    0.13
 -23  -2  -1    0.37    0.15
 -23   2   1    0.16    0.14
  23   2  -1    0.15    0.14
  23   2   1    0.26    0.11
 -23  -2   1    0.29    0.12
 -23   2  -1    0.30    0.15
  23   2   1    0.28    0.11
  23   2   1    0.21    0.14
  23   3  -1   14.78    0.81
 -23   3   1   15.13    0.80
 -23  -3  -1   15.76    0.83
  23   3  -1   15.96    0.72
  23   3  -1   15.26    0.76
  23   3   1   15.72    0.83
 -23  -3   1   16.04    0.76
  23   3   1   16.93    0.73
  23   3   1   16.10    0.73
 -23   3  -1   14.95    0.79
  23   4  -1    7.51    0.53
 -23  -4  -1    7.99    0.57
 -23   4   1    9.21    0.59
  23   4  -1    8.05    0.60
  23   4  -1    8.67    0.53
  23   4   1    7.97    0.59
  23   4   1    7.86    0.51
 -23  -4   1    8.01    0.51
  23   4   1    8.67    0.54
 -23   4  -1    9.12    0.59
  23   5  -1    6.00    0.47
  23   5  -1    5.38    0.54
  23   5  -1    4.24    0.45
 -23   5   1    4.45    0.45
 -23  -5  -1    4.60    0.46
 -23   5  -1    4.70    0.46
  23   5   1    5.23    0.54
  23   5   1    5.09    0.45
  23   5   1    5.10    0.45
 -23   6   1    7.46    0.60
  23   6  -1    7.25    0.59
  23   6  -1    7.71    0.68
  23   6  -1    7.12    0.59
 -23  -6  -1    7.41    0.63
  23   6   1    7.10    0.60
  23   6   1    5.98    0.64
  23   6   1    6.62    0.58
 -23   6  -1    7.38    0.59
  23   0  -2    0.21    0.12
  23   0  -2    0.23    0.11
 -23   0  -2    0.10    0.12
  23   0   2    0.11    0.10
 -23   1   2    6.51    0.44
  23  -1   2    5.80    0.34
 -23  -1  -2    6.19    0.46
  23   1  -2    5.99    0.40
  23   1   2    5.51    0.27
  23   1   2    5.69    0.40
 -23   1  -2    5.40    0.45
  23  -1  -2    6.00    0.41
 -23   1  -2    5.93    0.43
 -23   2   2    6.08    0.45
  23  -2   2    6.57    0.34
  23   2  -2    7.13    0.45
 -23  -2  -2    6.26    0.48
  23   2  -2    7.12    0.50
 -23   2  -2    7.19    0.48
  23   2   2    6.01    0.38
  23   2   2    6.37    0.45
 -23  -2   2    6.47    0.37
  23   2   2    6.94    0.39
  23   2   2    6.70    0.36
  23   3  -2    2.60    0.34
 -23   3   2    2.50    0.32
  23   3  -2    2.53    0.30
 -23  -3  -2    2.28    0.32
  23   3   2    2.72    0.27
  23   3   2    2.39    0.33
 -23   3  -2    2.49    0.31
  23   3   2    2.87    0.29
  23   4  -2    8.28    0.53
  23   4  -2    8.62    0.58
 -23   4   2    8.47    0.57
 -23  -4  -2    7.03    0.57
  23   4  -2    8.45    0.61
  23   4   2    7.94    0.60
  23   4   2    9.18    0.56
  23   5  -2    9.47    0.62
  23   5  -2    8.65    0.67
 -23   5   2    9.71    0.66
  23   5  -2    8.97    0.64
 -23  -5  -2    9.67    0.70
  23   5   2    9.60    0.63
  23   5   2    8.87    0.68
 -23   5  -2    9.43    0.64
  23   6  -2   10.70    0.80
 -23   6   2   11.95    0.78
  23   6  -2   10.66    0.73
  23   6  -2   11.39    0.78
  23   6   2   11.75    0.86
 -23   6  -2   10.87    0.74
  23   6   2   11.49    0.76
  23   0   3    0.00    0.10
  23   0  -3   -0.02    0.09
 -23   0  -3    0.21    0.15
 -23  -1  -3    2.54    0.33
  23   1  -3    2.97    0.31
 -23   1   3    2.80    0.30
  23  -1   3    2.61    0.22
 -23   1  -3    2.64    0.29
 -23   1  -3    2.88    0.35
  23   1   3    3.20    0.30
  23   2  -3    1.96    0.27
 -23  -2  -3    1.76    0.29
  23   2  -3    1.41    0.27
 -23   2   3    2.36    0.29
  23   2   3    1.93    0.27
  23   2   3    2.34    0.25
  23   2   3    2.45    0.26
 -23   2  -3    1.65    0.26
 -23   3   3   10.59    0.63
  23   3  -3    9.94    0.65
 -23  -3  -3   10.06    0.68
  23   3  -3    9.84    0.62
  23   3   3   10.82    0.59
  23   3   3    9.97    0.63
 -23   3  -3   10.02    0.61
  23   4  -3    7.53    0.59
  23   4  -3    8.13    0.60
 -23   4   3    7.64    0.55
 -23  -4  -3    8.99    0.66
  23   4   3    8.23    0.56
  23   4   3   10.07    0.66
 -23   4  -3    7.78    0.56
 -23   5   3    5.37    0.50
  23   5  -3    7.49    0.59
  23   5  -3    7.51    0.57
  23   5  -3    7.10    0.62
  23   5   3    6.17    0.61
 -23   5  -3    6.58    0.53
  23   5   3    6.36    0.53
 -23   6   3   10.49    0.73
  23   6  -3    9.46    0.74
  23   6  -3    9.52    0.78
  23   6  -3    9.21    0.70
 -23   6  -3    9.43    0.67
  23   6   3    9.88    0.71
 -23   0  -4   -0.04    0.14
  23   0  -4    0.07    0.11
 -23  -1  -4    2.35    0.34
 -23   1   4    2.30    0.27
  23   1  -4    1.87    0.27
 -23   1  -4    2.54    0.35
  23   1   4    1.81    0.25
 -23  -2  -4   13.26    0.84
  23   2  -4   13.09    0.74
 -23   2   4   13.25    0.72
  23   2   4   14.08    0.71
  23   2   4   14.85    0.75
 -23   2  -4   13.37    0.72
 -23   3   4    7.22    0.51
  23   3  -4    6.80    0.53
 -23  -3  -4    7.27    0.60
  23   3  -4    7.01    0.56
  23   3   4    6.80    0.46
 -23   3  -4    6.98    0.50
  23   3   4    6.99    0.49
  23   4  -4    2.93    0.40
 -23  -4  -4    2.26    0.39
  23   4  -4    2.63    0.38
 -23   4   4    2.16    0.33
 -23   4  -4    2.08    0.30
  23   4   4    2.82    0.36
 -23   5   4    6.01    0.52
  23   5  -4    5.55    0.57
  23   5  -4    6.05    0.60
  23   5  -4    5.65    0.53
 -23   5  -4    5.59    0.49
  23   5   4    5.96    0.56
  23   6  -4   11.08    0.84
 -23   6   4   10.06    0.73
  23   6  -4    9.77    0.74
  23   6  -4    9.99    0.78
  23   6   4   11.57    0.80
 -23   6  -4   10.85    0.73
 -23   0  -5   -0.07    0.15
  23   0  -5    0.06    0.12
 -23   1   5    3.73    0.33
  23   1  -5    2.78    0.35
 -23  -1  -5    2.73    0.40
 -23   1  -5    2.80    0.39
 -23   2   5    0.74    0.20
 -23  -2  -5    1.10    0.29
  23   2  -5    1.04    0.26
 -23   2  -5    0.67    0.19
  23   2   5    0.81    0.22
  23   3  -5    3.47    0.43
  23   3  -5    3.53    0.43
 -23   3   5    2.81    0.34
  23   3   5    3.29    0.38
  23   3   5    3.06    0.35
 -23   3  -5    3.51    0.35
  23   4  -5    7.38    0.61
 -23   4   5    7.82    0.57
  23   4  -5    6.24    0.57
  23   4   5    7.67    0.59
 -23   4  -5    7.48    0.54
  23   5  -5    6.80    0.62
  23   5  -5    6.26    0.62
 -23   5   5    6.53    0.54
  23   5   5    5.67    0.57
 -23   5  -5    6.46    0.53
  23   0  -6   -0.13    0.13
  23   1  -6    1.04    0.26
  23   1   6    1.87    0.32
 -23   2   6    0.91    0.22
  23   2  -6    1.35    0.30
  23   2   6    1.39    0.29
 -23   3   6    1.82    0.31
  23   3  -6    1.83    0.35
  23   3  -6    2.01    0.36
  23   3   6    1.49    0.31
 -23   3  -6    2.22    0.29
  23   3   6    2.40    0.35
  23   4  -6    7.43    0.67
  23   4  -6    8.68    0.69
 -23   4   6    8.50    0.61
  23   4   6    8.38    0.66
 -23   4  -6    8.73    0.59
  23   5  -6    3.49    0.52
 -23   5   6    4.39    0.48
  23   5  -6    3.33    0.51
  23   5   6    4.21    0.53
  23   0  -7    0.22    0.17
  23   1  -7    0.79    0.26
  23   1   7    1.37    0.33
  23   2  -7    2.06    0.37
  23   2   7    2.28    0.38
  23   3  -7    1.96    0.39
  23   3  -7    1.95    0.40
  23   3   7    2.62    0.42
  23   3   7    2.31    0.39
  23   4  -7    0.75    0.33
  23   4  -7    0.86    0.33
  23   4   7    0.77    0.31
  23   0  -8    0.18    0.21
  23   0   8    0.37    0.26
  23   1  -8    0.74    0.27
  23  -1  -8    0.70    0.26
  23   1   8    0.74    0.30
  23   2  -8    0.93    0.31
  23   2   8    0.78    0.31
  24   0   0   36.58    1.46
  24   0   0   31.81    1.17
  24   0   0   31.90    1.27
  24  -1   0   29.70    1.07
  24   1   0   28.16    1.19
 -24  -1   0   29.17    1.27
  24   1   0   31.66    1.32
 -24   1   0   30.28    1.25
  24   1   0   29.46    1.10
 -24   2   0   60.13    2.22
 -24  -2   0   60.78    2.33
  24   2   0   60.26    2.08
  24   2   0   59.88    2.19
 -24   3   0    4.31    0.39
  24   3   0    4.55    0.35
  24   3   0    3.86    0.41
  24   3   0    4.45    0.36
 -24  -3   0    4.23    0.36
 -24   4   0   12.00    0.73
  24   4   0   13.49    0.69
  24   4   0   12.70    0.71
 -24  -4   0   13.57    0.74
  24   4   0   12.75    0.78
  24   5   0    1.88    0.36
 -24   5   0    2.68    0.38
  24   5   0    3.01    0.37
  24   5   0    2.58    0.35
  24   6   0    2.23    0.36
  24   6   0    1.98    0.42
  24   6   0    2.24    0.39
 -24   6   0    2.10    0.37
 -24   0  -1   22.16    1.07
  24   0  -1   22.34    0.90
  24   0   1   22.69    0.80
  24   0  -1   23.50    1.03
  24   0   1   22.23    0.93
  24  -1   1   25.35    1.01
 -24  -1  -1   26.95    1.20
 -24   1   1   23.64    1.11
  24   1  -1   27.14    1.04
  24   1  -1   28.04    1.15
  24   1  -1   25.71    1.10
  24  -1   1   25.20    0.90
 -24  -1   1   26.24    1.12
  24   1   1   24.29    0.94
  24  -1  -1   29.65    1.20
 -24   1  -1   28.78    1.16
  24  -1  -1   27.82    1.02
  24   1   1   24.45    1.07
 -24   2   1    2.79    0.32
  24   2  -1    2.83    0.28
  24   2  -1    3.21    0.34
 -24  -2  -1    2.54    0.30
  24   2   1    2.55    0.31
 -24  -2   1    2.62    0.26
 -24   2  -1    2.72    0.32
  24   2   1    2.88    0.24
 -24   3   1   26.11    1.15
  24   3  -1   25.24    1.17
  24   3  -1   26.51    1.04
  24   3  -1   25.70    1.09
 -24  -3  -1   25.74    1.20
  24   3   1   24.28    1.14
  24   3   1   25.87    1.03
 -24  -3   1   25.59    1.11
 -24   3  -1   24.86    1.14
  24   3   1   26.69    1.05
  24   4  -1    1.04    0.23
  24   4  -1    0.35    0.20
 -24   4   1    0.34    0.19
 -24  -4  -1    1.15    0.26
  24   4  -1    1.15    0.23
 -24   4  -1    1.19    0.26
  24   4   1    0.93    0.22
  24   4   1    1.10    0.27
  24   4   1    1.03    0.23
  24   5  -1   10.41    0.65
 -24  -5  -1   10.95    0.72
  24   5  -1    9.99    0.72
  24   5  -1   11.73    0.72
 -24   5   1    9.52    0.67
  24   5   1    9.06    0.71
 -24   5  -1   10.32    0.69
  24   5   1    9.95    0.64
  24   5   1    9.70    0.65
  24   6  -1    0.96    0.34
  24   6  -1    0.99    0.30
  24   6  -1    1.47    0.32
 -24   6   1    1.25    0.31
  24   6   1    1.41    0.33
 -24   6  -1    1.00    0.30
  24   6   1    1.02    0.29
  24   6   1    1.19    0.34
  24   0  -2   76.98    2.80
 -24   0  -2   75.02    2.94
  24   0  -2   75.99    2.58
  24   0   2   74.37    2.55
  24   1  -2   26.63    1.09
  24  -1   2   26.16    1.00
 -24  -1  -2   26.19    1.23
 -24   1   2   26.49    1.14
  24  -1  -2   27.53    1.16
 -24   1  -2   25.12    1.12
  24   1   2   26.69    1.09
 -24  -2  -2   23.28    1.17
  24   2  -2   24.47    1.12
 -24   2   2   25.30    1.12
  24   2  -2   24.05    1.06
 -24   2  -2   25.30    1.11
  24   2   2   23.54    1.07
  24   2   2   26.73    0.99
 -24  -2   2   26.55    1.02
  24   2   2   24.60    0.93
  24   3  -2    9.85    0.58
 -24  -3  -2    8.51    0.61
 -24   3   2    9.37    0.59
  24   3  -2    8.90    0.61
  24   3   2    8.81    0.59
 -24   3  -2   10.02    0.60
  24   3   2    9.50    0.54
  24   3   2    9.40    0.50
  24   4  -2   19.36    0.89
 -24  -4  -2   17.30    0.98
  24   4  -2   16.99    0.96
  24   4  -2   17.75    0.92
 -24   4   2   18.98    0.95
  24   4   2   17.22    0.97
  24   4   2   18.07    0.88
 -24   4  -2   19.92    0.96
  24   5  -2    0.54    0.24
 -24  -5  -2    0.28    0.23
 -24   5   2    0.21    0.18
  24   5  -2    0.37    0.22
  24   5  -2    0.43    0.23
  24   5   2   -0.10    0.17
 -24   5  -2    0.41    0.21
  24   5   2    0.69    0.29
 -24   6   2    3.29    0.44
  24   6  -2    4.48    0.50
  24   6  -2    4.08    0.54
  24   6  -2    4.45    0.51
  24   6   2    3.41    0.51
  24   6   2    4.51    0.50
 -24   6  -2    3.53    0.44
  24   0  -3   10.73    0.58
  24   0   3    9.44    0.50
 -24   0  -3    9.67    0.66
 -24   1   3   34.78    1.40
  24   1  -3   36.23    1.40
 -24  -1  -3   33.06    1.55
  24   1   3   33.27    1.33
 -24   1  -3   35.88    1.59
  24   2  -3    1.46    0.25
 -24   2   3    1.63    0.27
  24   2  -3    1.26    0.25
 -24  -2  -3    1.60    0.29
 -24   2  -3    1.32    0.24
  24   2   3    2.16    0.25
  24   2   3    2.50    0.31
 -24  -3  -3   11.28    0.74
  24   3  -3   11.00    0.69
 -24   3   3   10.56    0.64
  24   3  -3   10.63    0.65
 -24   3  -3   11.00    0.66
  24   3   3   10.67    0.60
  24   3   3   10.10    0.66
 -24  -4  -3    1.26    0.30
  24   4  -3    1.69    0.32
  24   4  -3    2.46    0.35
 -24   4   3    1.95    0.30
  24   4   3    1.85    0.33
 -24   4  -3    2.30    0.32
  24   4   3    1.83    0.30
  24   5  -3    7.68    0.67
  24   5  -3    7.82    0.64
  24   5  -3    8.27    0.60
 -24   5   3    8.14    0.61
 -24   5  -3    8.83    0.62
  24   5   3    8.10    0.60
  24   5   3    8.98    0.71
  24   6  -3    0.38    0.25
 -24   6   3    0.54    0.24
  24   6  -3    0.49    0.29
  24   6  -3    0.35    0.25
  24   6   3    0.07    0.24
 -24   6  -3    0.63    0.26
  24   0  -4   21.29    1.01
 -24   0  -4   24.27    1.20
 -24   1   4   23.74    1.03
 -24  -1  -4   22.92    1.20
  24   1  -4   22.55    1.05
 -24   1  -4   23.17    1.21
  24   1   4   23.32    0.99
  24   2  -4   26.35    1.20
 -24  -2  -4   26.91    1.36
 -24   2   4   28.20    1.19
  24   2   4   27.38    1.15
 -24   2  -4   27.46    1.18
  24   2   4   26.18    1.16
 -24  -3  -4    2.56    0.39
  24   3  -4    2.93    0.39
  24   3  -4    2.88    0.37
 -24   3   4    3.06    0.35
  24   3   4    3.18    0.32
  24   3   4    2.50    0.32
 -24   3  -4    3.33    0.36
  24   4  -4    9.56    0.69
 -24   4   4    8.34    0.59
  24   4  -4    8.53    0.64
 -24   4  -4    9.27    0.61
  24   4   4    9.10    0.62
  24   5  -4    3.05    0.46
  24   5  -4    2.88    0.41
  24   5  -4    2.97    0.45
 -24   5   4    3.46    0.42
 -24   5  -4    2.80    0.39
  24   5   4    3.91    0.46
  24   6  -4    2.06    0.42
  24   6  -4    1.25    0.34
  24   6  -4    1.95    0.43
 -24   6   4    1.82    0.35
  24   6   4    1.47    0.38
 -24   6  -4    1.21    0.31
 -24   0  -5    5.42    0.52
  24   0  -5    4.91    0.43
 -24  -1  -5   24.25    1.28
  24   1  -5   22.25    1.10
 -24   1  -5   25.01    1.29
 -24   2   5    3.12    0.34
  24   2  -5    3.12    0.39
 -24  -2  -5    3.41    0.45
  24   2   5    2.91    0.36
  24   3  -5   12.46    0.80
  24   3  -5   12.45    0.80
 -24   3   5   13.98    0.76
  24   3   5   13.36    0.74
 -24   3  -5   12.80    0.71
 -24   4   5    2.34    0.34
  24   4  -5    2.23    0.39
  24   4  -5    2.03    0.37
  24   4   5    2.43    0.38
 -24   4  -5    1.95    0.32
  24   5  -5    3.64    0.51
 -24   5   5    3.78    0.46
  24   5  -5    3.30    0.49
 -24   5  -5    3.86    0.43
  24   5   5    3.04    0.44
  24   0  -6   22.63    1.11
  24   1  -6    5.69    0.50
  24   1   6    6.27    0.53
 -24   2   6    7.15    0.50
  24   2  -6    5.79    0.56
  24   2   6    6.20    0.53
  24   3  -6    4.39    0.50
  24   3  -6    4.22    0.50
 -24   3   6    4.70    0.45
  24   3   6    3.99    0.44
 -24   3  -6    4.19    0.40
  24   4  -6    7.86    0.67
  24   4  -6    9.75    0.75
 -24   4   6    8.36    0.62
  24   4   6    9.10    0.68
 -24   4  -6    8.97    0.59
  24   0  -7    5.72    0.55
  24   1  -7   10.65    0.75
  24  -1  -7   11.83    0.77
  24   1   7   12.46    0.80
  24   2  -7    3.34    0.45
  24   2   7    4.53    0.50
  24   3  -7    6.55    0.63
  24   3  -7    6.50    0.64
  24   3   7    6.67    0.61
  24   0  -8    3.64    0.48
  24   0   8    4.49    0.53
  24   1  -8    2.65    0.43
  24  -1  -8    3.03    0.44
  24   1   8    3.32    0.48
  24   2  -8    7.27    0.65
  24   2   8    8.02    0.69
  25   0   0    0.24    0.10
  25   0   0    0.30    0.12
 -25  -1   0    5.45    0.40
  25   1   0    5.40    0.40
  25   1   0    5.44    0.33
  25  -1   0    5.27    0.31
 -25   1   0    4.87    0.41
 -25  -2   0    5.64    0.42
 -25   2   0    5.50    0.44
  25   2   0    6.06    0.38
  25   2   0    5.72    0.44
  25   3   0   18.90    0.96
 -25  -3   0   19.31    0.94
 -25   3   0   20.09    0.97
  25   3   0   19.58    0.87
 -25   4   0    0.03    0.14
  25   4   0    0.24    0.17
  25   4   0    0.12    0.17
  25   4   0    0.02    0.14
 -25  -4   0    0.06    0.14
  25   5   0   14.32    0.91
 -25   5   0   14.04    0.85
  25   5   0   15.25    0.82
  25   5   0   14.87    0.83
  25   6   0    2.44    0.40
  25   6   0    2.25    0.38
 -25   6   0    2.13    0.37
  25   6   0    1.76    0.41
 -25   0  -1    0.07    0.13
  25   0  -1    0.07    0.09
  25   0   1    0.08    0.07
  25   0  -1   -0.03    0.13
  25   0   1   -0.02    0.11
 -25  -1  -1    8.39    0.55
  25   1  -1    7.72    0.51
  25   1  -1    8.16    0.47
  25   1  -1    8.55    0.52
 -25   1   1    8.63    0.55
  25  -1   1    8.64    0.47
  25   1   1    8.19    0.40
 -25  -1   1    9.22    0.51
 -25   1  -1    8.21    0.54
  25  -1  -1    7.89    0.44
  25   1   1    9.12    0.52
  25   2  -1    8.12    0.48
 -25   2   1    7.20    0.52
  25   2  -1    8.23    0.55
 -25  -2  -1    7.75    0.54
  25   2   1    8.19    0.44
 -25  -2   1    9.52    0.51
  25   2   1    7.97    0.53
 -25   2  -1    8.27    0.54
 -25   3   1    1.74    0.28
  25   3  -1    2.42    0.29
  25   3  -1    2.94    0.36
 -25  -3  -1    1.84    0.28
 -25   3  -1    1.85    0.29
  25   3   1    1.71    0.23
 -25  -3   1    2.08    0.25
  25   3   1    2.12    0.31
  25   4  -1    9.32    0.58
  25   4  -1    9.87    0.68
  25   4  -1    9.36    0.61
 -25   4   1    9.94    0.66
 -25  -4  -1    9.90    0.66
  25   4   1   11.02    0.62
 -25   4  -1   10.73    0.67
  25   4   1   11.15    0.62
  25   4   1   10.68    0.70
  25   5  -1    6.02    0.50
  25   5  -1    5.72    0.51
 -25   5   1    6.28    0.53
  25   5  -1    5.65    0.57
 -25  -5  -1    5.14    0.50
  25   5   1    6.00    0.58
 -25   5  -1    5.96    0.52
  25   5   1    6.65    0.52
  25   5   1    6.53    0.53
  25   6  -1   13.92    0.83
 -25   6   1   13.12    0.84
  25   6  -1   13.12    0.91
  25   6  -1   13.10    0.85
  25   6   1   12.82    0.83
 -25   6  -1   13.37    0.85
 -25   0  -2    0.33    0.15
  25   0  -2    0.14    0.11
  25   0   2    0.11    0.11
  25   1  -2   16.95    0.84
  25  -1   2   17.28    0.72
  25   1  -2   16.29    0.78
 -25  -1  -2   16.45    0.90
 -25   1   2   17.33    0.85
 -25   1  -2   17.53    0.85
  25   1   2   16.76    0.79
  25  -1  -2   17.51    0.84
  25   2  -2    1.52    0.23
 -25   2   2    1.21    0.25
 -25  -2  -2    1.16    0.24
  25   2  -2    1.24    0.25
  25   2   2    1.49    0.26
 -25   2  -2    0.79    0.20
  25   2   2    1.30    0.20
  25   3  -2    2.99    0.34
 -25   3   2    3.18    0.36
 -25  -3  -2    4.05    0.40
  25   3  -2    3.34    0.39
  25   3   2    3.76    0.39
 -25   3  -2    3.38    0.37
  25   3   2    4.05    0.32
  25   4  -2    1.39    0.26
  25   4  -2    1.95    0.33
  25   4  -2    1.62    0.29
 -25  -4  -2    1.13    0.28
 -25   4   2    1.27    0.28
  25   4   2    1.59    0.28
 -25   4  -2    1.28    0.27
  25   4   2    1.57    0.32
  25   5  -2   15.85    0.84
 -25   5   2   14.52    0.85
 -25  -5  -2   14.50    0.90
  25   5  -2   13.16    0.82
  25   5  -2   12.95    0.86
  25   5   2   13.81    0.80
  25   5   2   12.62    0.86
 -25   5  -2   14.59    0.85
 -25   6   2    0.30    0.23
  25   6  -2   -0.34    0.22
  25   6  -2    0.46    0.27
  25   6  -2    0.34    0.25
  25   6   2    0.07    0.24
 -25   6  -2   -0.07    0.17
  25   6   2   -0.07    0.27
 -25   0  -3   -0.06    0.11
  25   0  -3    0.10    0.12
  25   0   3    0.05    0.12
  25   1  -3    1.50    0.25
 -25   1   3    1.92    0.27
 -25  -1  -3    1.26    0.26
 -25   1  -3    1.42    0.28
  25   1   3    1.93    0.25
 -25   2   3   10.26    0.62
  25   2  -3   10.04    0.62
 -25  -2  -3    9.87    0.68
  25   2  -3   10.54    0.66
  25   2   3   11.49    0.64
  25   2   3   10.26    0.56
 -25   2  -3    8.98    0.59
 -25  -3  -3    2.92    0.38
 -25   3   3    3.01    0.35
  25   3  -3    3.08    0.38
  25   3  -3    3.28    0.36
  25   3   3    2.54    0.36
 -25   3  -3    2.58    0.34
 -25  -4  -3    9.93    0.71
  25   4  -3    8.69    0.65
 -25   4   3    8.99    0.62
  25   4  -3    9.83    0.65
  25   4   3    7.96    0.64
  25   4   3    8.24    0.58
 -25   4  -3    8.49    0.60
  25   5  -3    5.54    0.51
  25   5  -3    4.90    0.52
  25   5  -3    4.19    0.52
 -25   5   3    4.27    0.47
 -25   5  -3    4.90    0.49
  25   5   3    4.81    0.49
  25   5   3    4.40    0.53
 -25   6   3   14.88    0.92
  25   6  -3   15.64    1.03
  25   6  -3   15.88    0.95
  25   6  -3   16.08    1.00
 -25   6  -3   16.75    0.96
  25   6   3   15.66    0.95
 -25   0  -4    0.09    0.15
  25   0  -4    0.02    0.12
 -25   1   4    0.61    0.19
 -25  -1  -4    0.31    0.21
  25   1  -4    0.44    0.18
  25   1   4    0.21    0.16
 -25   1  -4    0.33    0.20
  25   2  -4    0.24    0.17
  25   2  -4    0.65    0.22
 -25   2   4    0.68    0.20
 -25  -2  -4    0.66    0.25
 -25   2  -4    0.41    0.17
  25   2   4    0.80    0.22
  25   2   4    0.37    0.20
  25   3  -4    6.26    0.53
  25   3  -4    6.82    0.55
 -25  -3  -4    6.78    0.59
 -25   3   4    6.09    0.48
 -25   3  -4    6.08    0.48
 -25   4   4    0.51    0.21
  25   4  -4    0.48    0.24
  25   4  -4    0.57    0.24
 -25   4  -4    0.41    0.21
 -25   5   4   11.76    0.77
  25   5  -4   10.95    0.80
  25   5  -4   10.87    0.75
  25   5  -4   11.29    0.79
  25   5   4   11.76    0.78
 -25   5  -4   11.57    0.74
  25   0  -5   -0.03    0.12
 -25   0  -5    0.07    0.18
 -25  -1  -5    1.02    0.29
  25   1  -5    1.04    0.25
 -25   1  -5    1.06    0.30
  25   2  -5    3.60    0.41
 -25   2   5    4.13    0.39
  25   2   5    3.60    0.40
  25   3  -5    4.44    0.49
  25   3  -5    5.49    0.53
 -25   3   5    4.76    0.44
 -25   3  -5    4.95    0.43
 -25   4   5    8.35    0.62
  25   4  -5    8.27    0.69
  25   4  -5    9.23    0.69
 -25   4  -5    8.76    0.60
  25   5  -5    1.10    0.35
  25   5  -5    1.64    0.39
 -25   5   5    1.31    0.30
 -25   5  -5    1.87    0.34
  25   5   5    1.58    0.37
  25   0  -6   -0.03    0.15
  25   1  -6    4.00    0.45
  25   1   6    4.54    0.47
  25  -1  -6    3.68    0.42
 -25   2   6    0.31    0.19
  25   2  -6    0.44    0.21
  25   2   6    0.39    0.22
 -25   3   6    3.33    0.40
  25   3  -6    4.42    0.50
  25   3  -6    3.68    0.48
 -25   3  -6    4.39    0.42
  25   3   6    3.82    0.44
  25   4  -6    2.73    0.45
  25   4  -6    3.11    0.45
 -25   4   6    2.42    0.37
 -25   4  -6    2.30    0.34
  25   0  -7   -0.04    0.17
  25   1  -7    0.29    0.22
  25   1   7    1.02    0.31
  25  -1  -7    0.43    0.21
  25   2  -7    2.27    0.39
  25   2   7    2.29    0.40
  25   3  -7    0.79    0.32
  25   3  -7    1.12    0.34
  25   3   7    1.52    0.37
  25   0  -8    0.04    0.20
  25   0   8    0.23    0.26
  25   1  -8   -0.09    0.18
  25  -1  -8    0.16    0.21
  25   1   8   -0.11    0.23
  26   0   0   39.52    1.37
  26   0   0   38.17    1.48
 -26   1   0    1.35    0.24
 -26  -1   0    0.43    0.16
  26   1   0    0.16    0.14
  26   1   0    0.33    0.12
  26  -1   0    0.34    0.11
  26   2   0   47.67    1.71
 -26  -2   0   48.23    1.92
  26   2   0   45.13    1.81
 -26   2   0   49.47    1.87
  26   3   0    0.24    0.18
 -26   3   0    0.20    0.15
 -26  -3   0    0.20    0.15
  26   3   0    0.14    0.14
  26   4   0    5.60    0.44
 -26  -4   0    5.36    0.44
 -26   4   0    5.73    0.49
  26   4   0    4.39    0.48
  26   5   0    0.85    0.31
 -26   5   0    0.49    0.25
  26   5   0    0.75    0.26
  26   5   0    0.79    0.25
  26   6   0    1.65    0.36
  26   6   0    1.34    0.38
 -26   6   0    1.98    0.38
  26   6   0    1.74    0.36
  26   0   1    2.58    0.27
  26   0  -1    2.78    0.31
 -26   0  -1    2.52    0.31
  26   0  -1    2.38    0.25
  26  -1   1   51.36    1.80
  26   1  -1   50.63    1.80
 -26   1   1   50.46    1.93
  26   1  -1   49.38    1.89
 -26  -1  -1   50.55    2.06
  26   1   1   48.88    1.86
 -26   1  -1   51.46    1.93
  26  -1  -1   51.10    1.77
  26   1   1   51.47    1.70
 -26  -2  -1    1.78    0.27
  26   2  -1    1.87    0.25
  26   2  -1    1.53    0.27
  26  -2   1    1.65    0.20
 -26   2   1    1.50    0.27
  26   2   1    1.79    0.21
  26   2   1    1.40    0.25
 -26  -2   1    1.79    0.23
 -26   2  -1    1.37    0.25
  26   3  -1   17.58    0.84
 -26  -3  -1   17.44    0.91
  26   3  -1   15.23    0.87
 -26   3   1   16.66    0.89
  26   3   1   17.91    0.79
  26   3   1   17.12    0.91
 -26   3  -1   16.55    0.89
 -26  -3   1   18.43    0.84
 -26   4   1   -0.03    0.15
  26   4  -1    0.24    0.19
  26   4  -1   -0.04    0.13
 -26  -4  -1    0.12    0.17
  26   4   1    0.02    0.16
  26   4   1    0.15    0.19
 -26   4  -1    0.14    0.17
  26   5  -1   13.86    0.82
 -26  -5  -1   12.95    0.82
  26   5  -1   11.67    0.84
  26   5  -1   13.45    0.77
 -26   5   1   12.92    0.81
  26   5   1   12.77    0.86
 -26   5  -1   14.85    0.86
  26   5   1   12.66    0.76
  26   5   1   12.95    0.77
  26   6  -1    0.51    0.28
  26   6  -1    0.24    0.26
 -26   6   1   -0.01    0.20
  26   6  -1    0.05    0.22
 -26   6  -1    0.09    0.23
  26   6   1    0.05    0.25
  26   6   1    0.21    0.25
  26   0   2   74.67    2.60
  26   0  -2   75.65    2.62
 -26   0  -2   79.36    3.02
  26   1  -2    0.81    0.21
 -26   1   2    1.47    0.25
  26  -1   2    0.99    0.17
 -26  -1  -2    1.16    0.25
  26   1  -2    0.93    0.20
  26   1   2    0.84    0.19
 -26   1  -2    1.06    0.23
  26  -1  -2    1.01    0.19
 -26   2   2   26.82    1.18
  26   2  -2   27.57    1.13
 -26  -2  -2   26.95    1.27
  26   2  -2   24.58    1.16
  26   2   2   25.74    1.15
 -26   2  -2   25.63    1.16
  26   3  -2    0.34    0.19
 -26   3   2    0.57    0.21
 -26  -3  -2    0.49    0.22
  26   3  -2    0.22    0.15
 -26   3  -2    0.52    0.19
  26   3   2    0.30    0.20
 -26  -4  -2   12.89    0.80
  26   4  -2   12.25    0.73
  26   4  -2   10.56    0.75
 -26   4   2   12.14    0.74
  26   4   2   11.66    0.77
 -26   4  -2   13.10    0.76
  26   5  -2    3.12    0.45
 -26   5   2    2.59    0.39
  26   5  -2    2.73    0.39
  26   5  -2    2.54    0.38
  26   5   2    2.46    0.37
  26   5   2    2.39    0.41
 -26   5  -2    1.98    0.35
 -26   6   2    4.50    0.51
  26   6  -2    5.13    0.54
  26   6  -2    4.02    0.56
  26   6  -2    3.35    0.48
 -26   6  -2    4.84    0.53
  26   6   2    3.90    0.55
  26   6   2    4.64    0.51
  26   0   3    4.38    0.34
 -26   0  -3    5.31    0.47
  26   0  -3    4.71    0.38
 -26   1   3   36.15    1.44
  26   1  -3   35.42    1.42
 -26  -1  -3   35.13    1.61
  26   1   3   34.60    1.38
  26  -1  -3   34.96    1.39
 -26   1  -3   34.85    1.62
  26   2  -3    1.01    0.23
 -26  -2  -3    0.77    0.24
 -26   2   3    0.78    0.21
  26   2  -3    0.96    0.25
  26   2   3    1.23    0.22
 -26   2  -3    1.16    0.24
  26   2   3    0.93    0.23
 -26   3   3   10.38    0.67
  26   3  -3   10.91    0.68
  26   3  -3   10.78    0.70
 -26  -3  -3   11.60    0.76
  26   3   3   10.56    0.69
 -26   3  -3   11.14    0.68
 -26   4   3    0.47    0.22
  26   4  -3    0.17    0.18
 -26  -4  -3    0.62    0.25
  26   4  -3    0.23    0.19
  26   4   3    0.58    0.26
 -26   4  -3    0.39    0.19
 -26   5   3    8.81    0.65
  26   5  -3    8.62    0.67
  26   5  -3    8.77    0.64
  26   5  -3    7.64    0.69
 -26   5  -3    7.97    0.62
  26   5   3    8.90    0.73
  26   6  -3    0.19    0.28
  26   6  -3    0.31    0.28
 -26   6   3    0.35    0.25
  26   6  -3    0.01    0.26
  26   6   3    0.47    0.30
 -26   6  -3    0.04    0.21
  26   0  -4   21.31    1.00
 -26   0  -4   21.97    1.17
 -26   1   4    0.56    0.19
 -26  -1  -4    0.14    0.18
  26   1  -4    0.26    0.18
  26   1   4    0.22    0.17
 -26   1  -4    0.20    0.19
 -26   2   4   49.15    1.87
  26   2  -4   47.01    1.88
  26   2  -4   44.01    1.89
 -26  -2  -4   50.37    2.15
  26   2   4   48.83    1.84
  26   2   4   46.65    1.84
 -26   2  -4   50.10    1.86
  26   3  -4    1.13    0.28
 -26  -3  -4    1.18    0.32
  26   3  -4    1.35    0.30
 -26   3   4    1.30    0.27
  26   3   4    0.69    0.26
 -26   3  -4    0.92    0.23
  26   4  -4    8.73    0.65
  26   4  -4    8.22    0.66
 -26   4   4    8.17    0.60
 -26   4  -4    8.21    0.60
  26   5  -4    0.28    0.25
 -26   5   4    0.09    0.20
  26   5  -4    0.39    0.26
  26   5  -4    0.43    0.29
 -26   5  -4    0.39    0.21
  26   0  -5    1.60    0.28
 -26   0  -5    0.61    0.26
  26   1  -5   16.92    0.90
  26  -1  -5   17.03    0.89
 -26   2   5    0.61    0.21
  26   2  -5    0.95    0.27
  26   2   5    0.92    0.25
 -26   3   5   14.96    0.82
  26   3  -5   13.71    0.86
  26   3  -5   12.94    0.83
 -26   3  -5   13.23    0.76
 -26   4   5    0.02    0.19
  26   4  -5    0.04    0.20
  26   4  -5    0.10    0.22
 -26   4  -5    0.02    0.19
  26   5  -5    1.06    0.35
 -26   5   5    1.54    0.35
  26   5  -5    1.33    0.36
 -26   5  -5    1.85    0.35
  26   0  -6   36.13    1.56
  26   1  -6    0.28    0.19
  26   1   6    0.26    0.21
  26  -1  -6    0.13    0.17
  26   2  -6   11.30    0.77
 -26   2   6   12.81    0.71
  26   2   6   11.19    0.74
 -26   3   6    1.43    0.30
  26   3  -6    1.07    0.31
  26   3  -6    1.43    0.33
  26   4  -6    6.76    0.66
  26   4  -6    7.51    0.66
 -26   4   6    6.77    0.59
 -26   4  -6    7.95    0.59
  26   0  -7    0.27    0.21
  26   1  -7   11.22    0.77
  26   1   7   11.98    0.80
  26  -1  -7   11.03    0.75
  26   2  -7    0.06    0.23
  26   2   7    0.25    0.26
  26   3  -7    6.81    0.65
  26   3  -7    6.82    0.67
  26   0  -8    7.82    0.66
  26   0   8    7.78    0.69
  27   0   0    0.28    0.11
  27   0   0    0.35    0.15
 -27   1   0    1.66    0.27
 -27  -1   0    1.37    0.23
  27  -1   0    1.65    0.18
  27   1   0    1.34    0.18
  27   1   0    1.29    0.24
 -27   2   0    0.42    0.18
  27   2   0    0.48    0.18
  27   2   0    0.63    0.16
 -27  -2   0    0.43    0.17
  27   3   0   13.00    0.67
 -27   3   0   12.99    0.76
  27   3   0   12.52    0.76
 -27  -3   0   12.55    0.72
 -27   4   0    0.15    0.18
  27   4   0   -0.10    0.14
  27   4   0    0.06    0.16
  27   5   0    9.61    0.75
  27   5   0    9.58    0.66
 -27   5   0    9.05    0.67
 -27   6   0    0.07    0.22
  27   6   0    0.15    0.23
  27   6   0    0.27    0.27
  27   6   0   -0.16    0.22
  27   0  -1   -0.01    0.11
  27   0  -1    0.06    0.10
  27   0   1    0.05    0.11
 -27   0  -1    0.10    0.15
  27   1  -1    5.03    0.41
 -27   1   1    4.19    0.38
 -27  -1  -1    3.86    0.38
  27  -1   1    4.59    0.34
  27   1  -1    3.82    0.32
  27  -1  -1    4.23    0.32
  27   1   1    4.49    0.38
 -27   1  -1    4.26    0.39
 -27  -2  -1    7.49    0.53
  27   2  -1    7.22    0.53
  27   2  -1    8.48    0.49
  27  -2   1    7.42    0.44
 -27   2   1    8.28    0.56
 -27   2  -1    7.42    0.53
  27   2   1    7.55    0.54
 -27  -2   1    7.63    0.48
  27   2   1    7.66    0.43
 -27   3   1    0.03    0.14
  27   3  -1    0.33    0.16
  27   3  -1    0.33    0.20
 -27  -3  -1    0.29    0.19
  27   3   1    0.28    0.16
 -27   3  -1    0.36    0.18
  27   3   1    0.02    0.16
 -27   4   1   20.35    1.03
  27   4  -1   18.97    1.05
  27   4  -1   20.06    0.98
 -27  -4  -1   19.64    1.04
  27   4   1   20.39    0.94
 -27   4  -1   20.15    1.03
  27   4   1   18.39    1.03
  27   5  -1    0.73    0.30
  27   5  -1    0.54    0.26
 -27   5   1    0.42    0.23
  27   5   1    0.47    0.24
  27   5   1    0.26    0.28
 -27   5  -1    0.57    0.25
 -27   6   1   12.03    0.82
  27   6  -1   12.60    0.83
  27   6  -1   10.63    0.85
  27   6  -1   12.29    0.81
 -27   6  -1   10.55    0.79
  27   6   1   11.70    0.88
  27   0  -2    0.25    0.13
  27   0   2    0.27    0.14
 -27   0  -2    0.41    0.17
  27   1  -2    4.59    0.37
  27   1  -2    4.05    0.38
 -27   1   2    4.12    0.40
 -27  -1  -2    4.80    0.44
  27  -1   2    5.22    0.34
  27   1   2    3.89    0.37
  27  -1  -2    4.47    0.35
 -27  -2  -2    0.85    0.23
 -27   2   2    0.71    0.21
  27   2  -2    0.78    0.23
  27   2  -2    0.73    0.20
 -27   2  -2    0.64    0.20
  27   2   2    0.80    0.22
 -27   3   2    3.20    0.38
  27   3  -2    4.33    0.40
 -27  -3  -2    4.86    0.45
  27   3  -2    4.57    0.46
  27   3   2    4.43    0.45
 -27   3  -2    3.66    0.40
  27   4  -2    0.60    0.26
 -27   4   2    0.66    0.24
 -27  -4  -2    0.97    0.28
  27   4  -2    0.86    0.26
  27   4   2    1.06    0.30
 -27   4  -2    1.14    0.27
  27   5  -2    9.14    0.68
  27   5  -2    8.25    0.70
 -27   5   2    8.21    0.65
  27   5   2    8.38    0.71
 -27   5  -2    9.17    0.67
  27   6  -2    0.66    0.35
  27   6  -2    0.33    0.29
 -27   6   2    0.54    0.27
  27   6  -2    0.94    0.33
 -27   6  -2    0.75    0.28
  27   6   2    0.61    0.35
 -27   0  -3   -0.04    0.14
  27   0   3   -0.12    0.12
  27   0  -3   -0.01    0.13
 -27  -1  -3    0.71    0.23
  27   1  -3    1.12    0.23
 -27   1   3    0.46    0.19
  27   1   3    0.81    0.20
  27  -1  -3    0.40    0.17
  27   2  -3    9.10    0.63
 -27  -2  -3    8.83    0.67
 -27   2   3    9.45    0.61
  27   2  -3    8.73    0.58
 -27   2  -3    9.54    0.61
  27   2   3    9.41    0.60
  27   3  -3    0.19    0.19
 -27  -3  -3    0.02    0.19
  27   3  -3    0.03    0.16
 -27   3   3    0.30    0.19
  27   3   3    0.28    0.20
 -27   3  -3    0.29    0.17
  27   4  -3   14.70    0.85
 -27   4   3   14.09    0.83
  27   4  -3   15.43    0.91
 -27   4  -3   14.44    0.83
  27   4   3   13.40    0.85
  27   5  -3    0.34    0.27
 -27   5   3    0.73    0.28
  27   5  -3    0.22    0.25
  27   5   3    0.47    0.28
 -27   5  -3    0.46    0.23
 -27   0  -4   -0.05    0.16
  27   0  -4    0.13    0.14
  27   1  -4    0.15    0.16
 -27  -1  -4    0.34    0.21
  27   1   4    0.40    0.19
 -27   1  -4    0.35    0.23
  27  -1  -4    0.17    0.15
 -27   2   4    1.39    0.26
 -27  -2  -4    0.86    0.28
  27   2  -4    1.27    0.27
  27   2  -4    1.28    0.29
  27   2   4    0.69    0.23
 -27   2  -4    1.30    0.26
  27   2   4    1.24    0.27
  27   3  -4   10.14    0.69
  27   3  -4    8.78    0.66
 -27   3   4    9.08    0.63
  27   3   4    8.92    0.65
 -27   3  -4   10.61    0.65
 -27   4   4    2.32    0.36
  27   4  -4    1.69    0.37
  27   4  -4    1.67    0.34
 -27   4  -4    2.11    0.34
  27   5  -4    7.04    0.64
 -27   5   4    7.21    0.61
  27   5  -4    6.19    0.64
 -27   5  -4    6.97    0.57
  27   0  -5    0.00    0.14
  27   1  -5    0.39    0.20
  27  -1  -5    0.09    0.15
  27   2  -5    2.58    0.39
  27   2  -5    3.10    0.40
 -27   2   5    3.27    0.38
  27   2   5    3.06    0.38
  27   3  -5    0.76    0.28
  27   3  -5    0.11    0.20
 -27   3   5    0.41    0.22
 -27   3  -5    0.58    0.21
  27   4  -5   11.52    0.81
 -27   4   5   11.76    0.76
  27   4  -5   10.56    0.80
 -27   4  -5   10.98    0.71
  27   0  -6    0.36    0.21
  27   1  -6    2.42    0.37
  27  -1  -6    2.02    0.33
  27   1   6    2.46    0.39
  27   2  -6    0.36    0.21
 -27   2   6    0.46    0.21
  27   2   6    0.54    0.25
  27   3  -6    2.49    0.42
 -27   3   6    2.77    0.38
  27   3  -6    2.50    0.42
  27   4  -6    0.18    0.26
  27   4  -6    0.25    0.27
 -27   4   6    0.54    0.28
 -27   4  -6    0.54    0.26
  27   0  -7   -0.08    0.18
  27   1  -7    0.06    0.18
  27  -1  -7    0.28    0.22
  27   1   7   -0.06    0.23
  27   2  -7    1.36    0.34
  27   2   7    1.64    0.36
  28   0   0   13.70    0.60
  28   0   0   13.45    0.69
  28   1   0   16.22    0.82
 -28  -1   0   17.00    0.85
  28  -1   0   15.92    0.76
 -28   1   0   15.92    0.84
  28   1   0   16.11    0.70
  28   2   0   19.66    0.98
 -28  -2   0   21.61    1.01
  28   2   0   20.37    0.88
 -28   2   0   21.27    1.02
 -28   3   0    6.20    0.51
 -28  -3   0    6.45    0.48
  28   3   0    6.31    0.45
  28   3   0    6.02    0.53
 -28   4   0    6.82    0.56
  28   4   0    8.06    0.62
  28   4   0    7.90    0.55
 -28   5   0    2.56    0.39
  28   5   0    2.17    0.35
  28   5   0    1.15    0.36
  28   6   0    0.41    0.26
 -28   6   0    0.19    0.25
  28   6   0   -0.08    0.24
  28   0  -1    4.56    0.33
  28   0   1    4.57    0.37
 -28   0  -1    4.66    0.42
  28   0  -1    4.19    0.38
  28   1  -1   32.83    1.27
 -28   1   1   31.54    1.38
 -28  -1  -1   34.14    1.48
  28  -1   1   33.62    1.28
  28   1  -1   33.52    1.37
  28   1   1   30.63    1.32
  28  -1  -1   33.23    1.24
 -28   2   1    4.80    0.43
 -28  -2  -1    4.87    0.42
  28   2  -1    4.07    0.35
  28  -2   1    4.07    0.32
  28   2  -1    3.87    0.40
  28   2   1    5.16    0.43
 -28   2  -1    4.41    0.43
 -28  -3  -1   19.56    1.01
  28   3  -1   20.34    0.93
 -28   3   1   18.55    0.99
  28   3  -1   19.16    1.01
  28   3   1   18.75    0.99
 -28   3  -1   19.31    1.01
 -28   4   1    1.71    0.32
  28   4  -1    1.76    0.30
  28   4  -1    1.81    0.35
 -28  -4  -1    1.76    0.32
 -28   4  -1    1.52    0.31
  28   4   1    1.12    0.31
 -28   5   1    3.89    0.48
  28   5  -1    4.59    0.55
  28   5  -1    4.40    0.47
  28   5   1    2.43    0.45
 -28   5  -1    4.48    0.49
  28   0   2   48.17    1.75
 -28   0  -2   47.05    2.02
  28   0  -2   47.01    1.74
 -28   1   2   11.18    0.67
  28   1  -2   10.93    0.66
  28  -1   2   10.76    0.56
 -28  -1  -2   11.52    0.72
  28   1  -2   11.71    0.62
  28  -1  -2   11.29    0.60
  28   1   2   10.83    0.62
 -28  -2  -2    9.22    0.64
  28   2  -2    8.45    0.60
  28   2  -2    8.66    0.55
 -28   2   2    9.10    0.60
 -28   2  -2    8.94    0.60
  28   2   2    9.03    0.59
 -28   3   2    2.68    0.36
  28   3  -2    2.71    0.37
 -28  -3  -2    2.17    0.35
  28   3  -2    1.96    0.31
  28   3   2    1.94    0.33
 -28   3  -2    2.28    0.33
 -28  -4  -2   15.75    0.93
  28   4  -2   14.63    0.91
  28   4  -2   14.65    0.85
 -28   4   2   16.43    0.90
  28   4   2   13.58    0.88
 -28   4  -2   15.92    0.89
  28   5  -2    2.15    0.41
 -28   5   2    1.44    0.32
  28   5  -2    1.35    0.33
  28   5   2    1.30    0.37
 -28   5  -2    0.89    0.29
  28   0   3    7.57    0.47
  28   0  -3    8.12    0.53
 -28   0  -3    8.23    0.63
 -28   1   3   16.19    0.83
  28   1  -3   15.43    0.79
 -28  -1  -3   15.49    0.92
  28  -1  -3   14.70    0.76
  28   1   3   15.06    0.77
  28   2  -3    6.10    0.49
  28   2  -3    6.59    0.52
 -28   2   3    6.43    0.49
 -28  -2  -3    7.25    0.58
 -28   2  -3    6.41    0.49
  28   2   3    5.16    0.47
  28   3  -3   14.16    0.78
  28   3  -3   12.84    0.81
 -28   3   3   13.53    0.79
 -28  -3  -3   13.09    0.85
  28   3   3   11.84    0.76
 -28   3  -3   13.03    0.77
 -28   4   3    5.01    0.51
  28   4  -3    5.02    0.50
  28   4  -3    4.90    0.54
  28   4   3    5.23    0.55
 -28   4  -3    5.52    0.51
 -28   5   3    3.94    0.48
  28   5  -3    3.83    0.52
  28   5  -3    3.26    0.46
 -28   5  -3    3.35    0.43
  28   5   3    3.32    0.50
  28   0  -4   14.81    0.78
 -28   0  -4   14.00    0.91
  28   1  -4    5.68    0.48
 -28  -1  -4    6.25    0.57
  28   1   4    5.65    0.44
 -28   1  -4    6.28    0.57
  28  -1  -4    5.74    0.46
 -28   2   4   24.84    1.14
  28   2  -4   22.95    1.16
  28   2  -4   23.73    1.14
 -28   2  -4   25.11    1.13
  28   2   4   22.81    1.10
 -28   3   4    1.31    0.29
  28   3  -4    1.21    0.32
  28   3  -4    1.66    0.32
 -28   3  -4    0.77    0.24
  28   3   4    1.73    0.35
  28   4  -4   10.09    0.76
  28   4  -4    9.02    0.69
 -28   4   4   10.22    0.70
 -28   4  -4    9.39    0.67
 -28   5   4    0.03    0.23
  28   5  -4    0.32    0.26
  28   5  -4    0.58    0.32
 -28   5  -4    0.26    0.22
  28   0  -5    6.26    0.52
  28   1  -5   12.09    0.73
  28  -1  -5   10.05    0.67
  28   2  -5    3.03    0.41
 -28   2   5    2.79    0.36
  28   2  -5    2.07    0.37
  28   2   5    2.79    0.37
  28   3  -5    9.93    0.75
 -28   3   5   12.18    0.75
  28   3  -5   12.30    0.80
 -28   3  -5   11.51    0.71
 -28   4   5    2.79    0.40
  28   4  -5    2.07    0.41
  28   4  -5    3.21    0.46
 -28   4  -5    3.31    0.40
  28   0  -6   12.36    0.78
  28   1  -6    3.12    0.42
  28  -1  -6    3.66    0.42
  28   1   6    3.89    0.46
  28   2  -6    4.06    0.49
  28   2   6    5.67    0.54
  28   3  -6    4.62    0.56
 -28   3   6    5.25    0.51
  28   3  -6    5.34    0.58
  28   0  -7    2.31    0.38
  28   1  -7   12.57    0.82
  28   1   7   11.80    0.82
  28  -1  -7   10.71    0.75
  28   2  -7    2.00    0.41
  28   2   7    1.71    0.40
  29   0   0    0.22    0.15
  29   1   0    0.88    0.22
 -29   1   0    1.32    0.26
 -29  -1   0    1.74    0.26
  29  -1   0    1.48    0.23
 -29   2   0    2.16    0.32
 -29  -2   0    2.28    0.30
  29   2   0    2.46    0.33
  29   2   0    2.83    0.29
  29   3   0    6.77    0.47
  29   3   0    6.88    0.55
 -29   3   0    7.38    0.57
  29   4   0    2.81    0.42
  29   4   0    3.21    0.38
 -29   4   0    3.34    0.41
  29   5   0    8.88    0.63
 -29   5   0    8.20    0.66
  29   5   0    8.23    0.69
  29   0  -1    0.09    0.13
  29   0   1    0.08    0.14
  29   0  -1    0.07    0.11
  29   1  -1    0.53    0.17
 -29  -1  -1    0.50    0.20
 -29   1   1    0.75    0.21
  29  -1   1    0.61    0.16
  29   1  -1    0.65    0.20
  29   1   1    0.69    0.20
  29  -1  -1    0.48    0.15
 -29   2   1    2.01    0.31
 -29  -2  -1    1.87    0.30
  29   2  -1    2.03    0.31
  29   2  -1    2.08    0.27
 -29   2  -1    1.98    0.31
  29   2   1    1.43    0.28
  29   3  -1    4.10    0.39
  29   3  -1    3.68    0.44
 -29  -3  -1    3.94    0.43
 -29   3   1    4.90    0.48
 -29   3  -1    4.16    0.44
  29   3   1    4.14    0.45
  29   4  -1    5.25    0.54
  29   4  -1    4.98    0.46
 -29   4   1    5.17    0.51
  29   4   1    5.20    0.54
 -29   4  -1    4.76    0.49
  29   5  -1    2.72    0.45
 -29   5   1    2.06    0.38
  29   5  -1    2.47    0.38
  29   5   1    1.82    0.41
 -29   5  -1    2.74    0.42
 -29   0  -2    0.09    0.16
  29   0  -2    0.04    0.11
  29   0   2    0.15    0.15
 -29  -1  -2    2.89    0.38
  29   1  -2    3.42    0.33
  29   1  -2    2.50    0.33
 -29   1   2    3.26    0.36
  29  -1  -2    3.15    0.31
  29   1   2    3.18    0.35
 -29   2   2    3.40    0.38
  29   2  -2    3.19    0.35
 -29  -2  -2    3.25    0.39
  29   2  -2    2.98    0.38
 -29   2  -2    3.19    0.38
  29   2   2    3.40    0.38
 -29  -3  -2    2.54    0.37
  29   3  -2    2.83    0.39
 -29   3   2    2.41    0.36
  29   3  -2    3.03    0.35
  29   3   2    2.68    0.37
 -29   3  -2    2.58    0.36
  29   4  -2    3.42    0.42
  29   4  -2    2.97    0.43
 -29   4   2    4.61    0.48
 -29  -4  -2    3.91    0.47
  29   4   2    3.28    0.46
 -29   4  -2    3.98    0.46
  29   5  -2    5.70    0.57
 -29   5   2    6.41    0.57
  29   5  -2    5.08    0.59
 -29   5  -2    5.87    0.57
  29   0  -3    0.09    0.14
 -29   0  -3    0.12    0.17
 -29  -1  -3    0.05    0.18
  29   1  -3    0.34    0.17
  29   1  -3    0.07    0.15
  29   1   3    0.01    0.15
  29  -1  -3    0.12    0.13
  29   2  -3    0.80    0.24
 -29   2   3    1.17    0.26
  29   2  -3    0.87    0.25
 -29  -2  -3    0.95    0.27
 -29   2  -3    1.11    0.26
  29   2   3    1.06    0.26
 -29   3   3    1.68    0.32
 -29  -3  -3    2.93    0.42
  29   3  -3    1.97    0.36
  29   3  -3    2.55    0.36
  29   3   3    2.24    0.37
 -29   3  -3    2.33    0.34
  29   4  -3    6.15    0.54
  29   4  -3    5.34    0.57
 -29   4   3    5.31    0.53
 -29   4  -3    6.05    0.53
  29   4   3    5.86    0.59
  29   5  -3    3.28    0.47
 -29   5   3    2.42    0.40
  29   5  -3    2.88    0.49
 -29   5  -3    2.98    0.43
  29   5   3    4.23    0.54
  29   0  -4   -0.10    0.14
  29   1  -4    0.16    0.17
  29  -1  -4    0.04    0.15
 -29   2   4    1.98    0.32
  29   2  -4    1.75    0.34
  29   2  -4    1.86    0.32
  29   2   4    2.29    0.34
  29   3  -4    7.84    0.66
 -29   3   4    9.43    0.65
  29   3  -4    9.05    0.66
  29   3   4    8.91    0.66
 -29   3  -4    8.80    0.62
 -29   4   4    2.20    0.38
  29   4  -4    1.61    0.35
  29   4  -4    1.43    0.37
 -29   4  -4    2.20    0.36
  29   0  -5   -0.04    0.15
  29   1  -5    0.15    0.18
  29  -1  -5    0.62    0.22
 -29   2   5    2.38    0.35
  29   2  -5    3.39    0.42
  29   2  -5    3.00    0.42
  29   3  -5    3.10    0.44
 -29   3   5    2.66    0.38
  29   3  -5    2.48    0.41
 -29   3  -5    2.38    0.35
  29   4  -5    5.83    0.62
 -29   4   5    6.46    0.58
  29   4  -5    6.28    0.62
 -29   4  -5    5.19    0.49
  29   0  -6    0.03    0.17
  29   1  -6    2.40    0.39
  29  -1  -6    1.52    0.32
  29   1   6    2.46    0.39
  29   2  -6    1.33    0.35
  29   2  -6    0.96    0.31
  29   2   6    1.27    0.32
 -29   3   6    3.70    0.45
  29   3  -6    2.95    0.46
  29   3  -6    3.76    0.51
  29   0  -7   -0.06    0.21
  29   1  -7   -0.20    0.20
  29  -1  -7    0.01    0.20
  29   1   7    0.13    0.25
  30   0   0    2.21    0.29
  30   1   0   19.37    0.97
  30  -1   0   20.71    0.93
 -30  -1   0   22.35    1.05
 -30  -2   0   14.12    0.77
  30   2   0   13.18    0.78
 -30   2   0   13.08    0.79
 -30   3   0   11.15    0.73
  30   3   0   11.06    0.74
  30   4   0    1.62    0.35
 -30   4   0    1.65    0.33
  30   5   0   11.20    0.84
 -30   5   0   13.24    0.85
  30   0  -1   12.46    0.69
  30   0  -1   12.46    0.62
  30   0   1   12.99    0.68
  30   1  -1    8.46    0.49
  30  -1   1    7.93    0.50
  30   1  -1    7.77    0.55
 -30  -1  -1    8.77    0.60
  30   1   1    8.02    0.55
  30   2  -1   10.66    0.70
  30   2  -1   12.08    0.65
 -30  -2  -1   13.51    0.77
 -30   2   1   11.49    0.73
 -30   2  -1   12.91    0.77
  30   2   1   11.66    0.72
 -30  -3  -1    6.17    0.52
  30   3  -1    6.64    0.49
 -30   3   1    6.88    0.56
  30   3  -1    6.35    0.54
 -30   3  -1    6.15    0.53
  30   3   1    6.14    0.55
  30   4  -1    7.66    0.57
 -30   4   1    7.27    0.61
  30   4  -1    6.79    0.62
  30   4   1    7.10    0.62
 -30   4  -1    8.63    0.64
 -30   5   1    2.71    0.42
  30   5  -1    3.41    0.51
  30   5  -1    3.44    0.44
  30   5   1    3.77    0.52
 -30   5  -1    3.61    0.48
 -30   0  -2   17.19    0.97
  30   0   2   15.59    0.79
  30   0  -2   17.61    0.81
 -30  -1  -2   12.81    0.79
  30   1  -2   12.26    0.66
  30   1  -2   10.94    0.69
  30   1   2   12.00    0.68
  30  -1  -2   12.04    0.64
  30   2  -2    2.46    0.35
 -30   2   2    2.98    0.38
  30   2  -2    2.58    0.32
 -30  -2  -2    2.53    0.38
 -30   2  -2    3.02    0.37
  30   2   2    3.55    0.39
  30   3  -2   10.33    0.64
  30   3  -2    8.79    0.67
 -30   3   2    9.46    0.66
 -30  -3  -2    9.16    0.68
  30   3   2    9.07    0.66
[truncated: 14,677 more chars]
