# Supplementary material
Source: MDPI journal article supplement (https://www.mdpi.com/2304-6740/11/10/417)
Supplement: s1 [file s1 › 2298038.cif]

 
data_JA2009_148_0m
 
_audit_creation_method            'SHELXL-2014/7'
_shelx_SHELXL_version_number      '2014/7'
_chemical_name_systematic         ?
_chemical_name_common             ?
_chemical_melting_point           ?
_chemical_formula_moiety          ?
_chemical_formula_sum
 'C14 H10 Ag N3 O S2' 
_chemical_formula_weight          408.24

loop_
 _atom_type_symbol
 _atom_type_description
 _atom_type_scat_dispersion_real
 _atom_type_scat_dispersion_imag
 _atom_type_scat_source
 'C'  'C'   0.0033   0.0016
 'International Tables Vol C Tables 4.2.6.8 and 6.1.1.4'
 'Ag'  'Ag'  -0.8971   1.1015
 'International Tables Vol C Tables 4.2.6.8 and 6.1.1.4'
 'N'  'N'   0.0061   0.0033
 'International Tables Vol C Tables 4.2.6.8 and 6.1.1.4'
 'O'  'O'   0.0106   0.0060
 'International Tables Vol C Tables 4.2.6.8 and 6.1.1.4'
 'S'  'S'   0.1246   0.1234
 'International Tables Vol C Tables 4.2.6.8 and 6.1.1.4'
 'H'  'H'   0.0000   0.0000
 'International Tables Vol C Tables 4.2.6.8 and 6.1.1.4'
 
_space_group_crystal_system       triclinic
_space_group_IT_number            2
_space_group_name_H-M_alt         'P -1'
_space_group_name_Hall            '-P 1'
 
_shelx_space_group_comment
;
The symmetry employed for this shelxl refinement is uniquely defined
by the following loop, which should always be used as a source of
symmetry information in preference to the above space-group names.
They are only intended as comments.
;
 
loop_
 _space_group_symop_operation_xyz
 'x, y, z'
 '-x, -y, -z'
 
_cell_length_a                    6.0975(2)
_cell_length_b                    8.7626(4)
_cell_length_c                    14.6204(6)
_cell_angle_alpha                 95.010(2)
_cell_angle_beta                  100.1270(10)
_cell_angle_gamma                 90.578(2)
_cell_volume                      765.80(5)
_cell_formula_units_Z             2
_cell_measurement_temperature     293(2)
_cell_measurement_reflns_used     6424
_cell_measurement_theta_min       2.43
_cell_measurement_theta_max       28.72
 
_exptl_crystal_description       'needle'
_exptl_crystal_colour            'colourless'
_exptl_crystal_density_meas       ?
_exptl_crystal_density_method     ?
_exptl_crystal_density_diffrn     1.770          
_exptl_crystal_F_000              404
_exptl_transmission_factor_min    ?
_exptl_transmission_factor_max    ?
_exptl_crystal_size_max           0.450
_exptl_crystal_size_mid           0.230
_exptl_crystal_size_min           0.180
_exptl_absorpt_coefficient_mu     1.589
_shelx_estimated_absorpt_T_min    0.535
_shelx_estimated_absorpt_T_max    0.763
_exptl_absorpt_correction_type    multi-scan
_exptl_absorpt_correction_T_min   0.7952  
_exptl_absorpt_correction_T_max   1.000
_exptl_absorpt_process_details    'SADABS (Sheldrick, 2008)' 
_exptl_absorpt_special_details    ?
_diffrn_ambient_temperature       293(2)
_diffrn_radiation_wavelength      0.71073
_diffrn_radiation_type           'MoK\a'
_diffrn_radiation_source         'sealed tube'
_diffrn_radiation_monochromator  'graphite'
_diffrn_measurement_device_type  'Bruker APEX-II CCD'
_diffrn_measurement_method       '\f and \w scans'
_diffrn_detector_area_resol_mean  ?
_diffrn_reflns_number             18713
_diffrn_reflns_av_unetI/netI      0.0283
_diffrn_reflns_av_R_equivalents   0.0318
_diffrn_reflns_limit_h_min        -9
_diffrn_reflns_limit_h_max        9
_diffrn_reflns_limit_k_min        -13
_diffrn_reflns_limit_k_max        13
_diffrn_reflns_limit_l_min        -22
_diffrn_reflns_limit_l_max        22
_diffrn_reflns_theta_min          1.421
_diffrn_reflns_theta_max          33.169
_diffrn_reflns_theta_full         25.242
_diffrn_measured_fraction_theta_max   0.943
_diffrn_measured_fraction_theta_full  0.942
_diffrn_reflns_Laue_measured_fraction_max    0.943
_diffrn_reflns_Laue_measured_fraction_full   0.942
_diffrn_reflns_point_group_measured_fraction_max   0.943
_diffrn_reflns_point_group_measured_fraction_full  0.942
_reflns_number_total              2483
_reflns_number_gt                 2415
_reflns_threshold_expression      'I > 2\s(I)'
_reflns_Friedel_coverage          0.000
_reflns_Friedel_fraction_max      .
_reflns_Friedel_fraction_full     .
 
_reflns_special_details
;
 Reflections were merged by SHELXL according to the crystal
 class for the calculation of statistics and refinement.
 
 _reflns_Friedel_fraction is defined as the number of unique
 Friedel pairs measured divided by the number that would be
 possible theoretically, ignoring centric projections and
 systematic absences.
;
 
_computing_data_collection      'Bruker APEX2'
_computing_cell_refinement      'Bruker SAINT'
_computing_data_reduction       'Bruker SAINT'  
_computing_structure_solution   'SHELXS-97 (Sheldrick, 2008)'
_computing_structure_refinement 'SHELXL-97 (Sheldrick, 2008)'
_computing_molecular_graphics   'Bruker SHELXTL'
_computing_publication_material 'Bruker SHELXTL'
_refine_special_details           ?
_refine_ls_structure_factor_coef  Fsqd
_refine_ls_matrix_type            full
_refine_ls_weighting_scheme       calc
_refine_ls_weighting_details
'w=1/[\s^2^(Fo^2^)+(0.0234P)^2^] where P=(Fo^2^+2Fc^2^)/3'
_atom_sites_solution_primary      ?
_atom_sites_solution_secondary    ?
_atom_sites_solution_hydrogens    geom
_refine_ls_hydrogen_treatment     constr
_refine_ls_extinction_method      none
_refine_ls_extinction_coef        .
_refine_ls_number_reflns          2483
_refine_ls_number_parameters      190
_refine_ls_number_restraints      0
_refine_ls_R_factor_all           0.0182
_refine_ls_R_factor_gt            0.0174
_refine_ls_wR_factor_ref          0.0450
_refine_ls_wR_factor_gt           0.0448
_refine_ls_goodness_of_fit_ref    1.078
_refine_ls_restrained_S_all       1.078
_refine_ls_shift/su_max           0.001
_refine_ls_shift/su_mean          0.000
 
loop_
 _atom_site_label
 _atom_site_type_symbol
 _atom_site_fract_x
 _atom_site_fract_y
 _atom_site_fract_z
 _atom_site_U_iso_or_equiv
 _atom_site_adp_type
 _atom_site_occupancy
 _atom_site_site_symmetry_order  
 _atom_site_calc_flag
 _atom_site_refinement_flags_posn
 _atom_site_refinement_flags_adp
 _atom_site_refinement_flags_occupancy
 _atom_site_disorder_assembly
 _atom_site_disorder_group
Ag1 Ag 0.91718(2) -0.00031(2) 0.10433(2) 0.01912(4) Uani 1 1 d . . . . .
S1 S 1.09390(6) 0.22116(4) 0.03528(3) 0.01717(7) Uani 1 1 d . . . . .
S2 S 1.22732(7) -0.04647(6) 0.24378(3) 0.02212(8) Uani 1 1 d . . . . .
N1 N 0.7247(3) 0.38766(18) -0.04316(11) 0.0240(3) Uani 1 1 d . . . . .
C1 C 0.8760(3) 0.31798(17) -0.01095(11) 0.0173(3) Uani 1 1 d . . . . .
O2 O 1.3628(2) 0.4256(2) 0.34077(11) 0.0304(3) Uani 1 1 d . . . . .
C8 C 1.1796(3) 0.3814(2) 0.35172(11) 0.0196(3) Uani 1 1 d . . . . .
C5 C 0.9790(3) 0.41576(18) 0.28199(11) 0.0171(3) Uani 1 1 d . . . . .
C6 C 0.7959(3) 0.31473(18) 0.25695(11) 0.0182(3) Uani 1 1 d . . . . .
H6 H 0.7943 0.2224 0.2837 0.022 Uiso 1 1 calc R U . . .
C7 C 0.6165(3) 0.3533(2) 0.19182(11) 0.0217(3) Uani 1 1 d . . . . .
H7 H 0.4946 0.2860 0.1735 0.026 Uiso 1 1 calc R U . . .
N3 N 0.6193(3) 0.48814(19) 0.15521(10) 0.0233(3) Uani 1 1 d . . . . .
H3 H 0.5038 0.5127 0.1171 0.028 Uiso 1 1 calc R U . . .
C3 C 0.7940(4) 0.5861(2) 0.17547(12) 0.0270(4) Uani 1 1 d . . . . .
H3A H 0.7904 0.6774 0.1473 0.032 Uiso 1 1 calc R U . . .
C4 C 0.9804(3) 0.5516(2) 0.23826(12) 0.0227(3) Uani 1 1 d . . . . .
H4 H 1.1045 0.6176 0.2512 0.027 Uiso 1 1 calc R U . . .
C9 C 1.1509(3) 0.29720(19) 0.43340(10) 0.0167(2) Uani 1 1 d . . . . .
C10 C 1.3312(3) 0.2165(2) 0.47555(12) 0.0213(3) Uani 1 1 d . . . . .
H10 H 1.4613 0.2122 0.4506 0.026 Uiso 1 1 calc R U . . .
C11 C 1.3176(3) 0.1423(2) 0.55472(13) 0.0242(3) Uani 1 1 d . . . . .
H11 H 1.4376 0.0876 0.5823 0.029 Uiso 1 1 calc R U . . .
C12 C 1.1229(3) 0.1505(2) 0.59271(12) 0.0226(3) Uani 1 1 d . . . . .
H12 H 1.1137 0.1016 0.6459 0.027 Uiso 1 1 calc R U . . .
C13 C 0.9436(3) 0.2309(2) 0.55138(11) 0.0196(3) Uani 1 1 d . . . . .
H13 H 0.8147 0.2362 0.5772 0.023 Uiso 1 1 calc R U . . .
C14 C 0.9545(3) 0.30437(18) 0.47106(11) 0.0166(3) Uani 1 1 d . . . . .
H14 H 0.8331 0.3573 0.4430 0.020 Uiso 1 1 calc R U . . .
C2 C 1.4425(3) -0.03586(18) 0.18994(11) 0.0181(3) Uani 1 1 d . . . . .
N2 N 0.5976(3) -0.0250(2) 0.15444(13) 0.0267(3) Uani 1 1 d . . . . .
 
loop_
 _atom_site_aniso_label
 _atom_site_aniso_U_11
 _atom_site_aniso_U_22
 _atom_site_aniso_U_33
 _atom_site_aniso_U_23
 _atom_site_aniso_U_13
 _atom_site_aniso_U_12
Ag1 0.01440(6) 0.02046(6) 0.02340(7) 0.00475(4) 0.00439(4) 0.00186(4)
S1 0.01686(16) 0.01677(15) 0.01718(16) 0.00394(13) -0.00004(13) -0.00005(12)
S2 0.01636(17) 0.0348(2) 0.01649(17) 0.00847(16) 0.00351(14) 0.00158(15)
N1 0.0267(7) 0.0207(6) 0.0241(7) 0.0037(5) 0.0020(6) 0.0050(5)
C1 0.0228(7) 0.0148(6) 0.0149(6) 0.0010(5) 0.0047(6) 0.0004(5)
O2 0.0181(6) 0.0448(8) 0.0302(7) 0.0101(6) 0.0067(5) -0.0043(5)
C8 0.0176(6) 0.0242(7) 0.0176(6) 0.0028(6) 0.0040(5) 0.0001(5)
C5 0.0194(7) 0.0190(6) 0.0138(6) 0.0020(5) 0.0047(5) 0.0026(5)
C6 0.0208(7) 0.0176(6) 0.0158(6) 0.0023(5) 0.0018(5) 0.0020(5)
C7 0.0217(7) 0.0247(7) 0.0173(7) 0.0009(6) 0.0000(6) 0.0044(6)
N3 0.0296(7) 0.0267(7) 0.0138(5) 0.0034(5) 0.0032(5) 0.0112(6)
C3 0.0421(10) 0.0239(7) 0.0170(7) 0.0072(6) 0.0078(7) 0.0081(7)
C4 0.0301(8) 0.0214(7) 0.0184(7) 0.0043(6) 0.0079(6) -0.0020(6)
C9 0.0138(6) 0.0216(6) 0.0140(6) 0.0016(5) 0.0006(5) -0.0001(5)
C10 0.0128(6) 0.0317(8) 0.0188(7) 0.0041(6) 0.0006(6) 0.0032(6)
C11 0.0183(7) 0.0333(8) 0.0204(7) 0.0065(6) -0.0007(6) 0.0052(6)
C12 0.0236(7) 0.0288(8) 0.0151(6) 0.0061(6) 0.0006(6) 0.0013(6)
C13 0.0163(6) 0.0268(7) 0.0157(6) 0.0027(5) 0.0026(5) 0.0001(5)
C14 0.0139(6) 0.0202(6) 0.0152(6) 0.0012(5) 0.0013(5) 0.0005(5)
C2 0.0147(6) 0.0181(6) 0.0204(6) 0.0017(5) 0.0000(5) -0.0005(5)
N2 0.0167(6) 0.0281(7) 0.0359(8) 0.0022(6) 0.0073(6) -0.0012(5)
 
_geom_special_details
;
 All esds (except the esd in the dihedral angle between two l.s. planes)
 are estimated using the full covariance matrix.  The cell esds are taken
 into account individually in the estimation of esds in distances, angles
 and torsion angles; correlations between esds in cell parameters are only
 used when they are defined by crystal symmetry.  An approximate (isotropic)
 treatment of cell esds is used for estimating esds involving l.s. planes.
;
 
loop_
 _geom_bond_atom_site_label_1
 _geom_bond_atom_site_label_2
 _geom_bond_distance
 _geom_bond_site_symmetry_2
 _geom_bond_publ_flag
Ag1 N2 2.2141(15) . ?
Ag1 S1 2.5747(4) . ?
Ag1 S2 2.5885(5) . ?
Ag1 S1 2.6787(4) 2_755 ?
Ag1 Ag1 3.3784(2) 2_755 ?
S1 C1 1.6581(17) . ?
S1 Ag1 2.6787(4) 2_755 ?
S2 C2 1.6503(15) . ?
N1 C1 1.164(2) . ?
O2 C8 1.220(2) . ?
C8 C9 1.492(2) . ?
C8 C5 1.499(3) . ?
C5 C6 1.394(2) . ?
C5 C4 1.400(2) . ?
C6 C7 1.384(2) . ?
C6 H6 0.9300 . ?
C7 N3 1.340(2) . ?
C7 H7 0.9300 . ?
N3 C3 1.336(3) . ?
N3 H3 0.8600 . ?
C3 C4 1.383(3) . ?
C3 H3A 0.9300 . ?
C4 H4 0.9300 . ?
C9 C10 1.394(2) . ?
C9 C14 1.4028(19) . ?
C10 C11 1.390(2) . ?
C10 H10 0.9300 . ?
C11 C12 1.396(2) . ?
C11 H11 0.9300 . ?
C12 C13 1.384(2) . ?
C12 H12 0.9300 . ?
C13 C14 1.399(2) . ?
C13 H13 0.9300 . ?
C14 H14 0.9300 . ?
C2 N2 1.163(2) 1_655 ?
N2 C2 1.163(2) 1_455 ?
 
loop_
 _geom_angle_atom_site_label_1
 _geom_angle_atom_site_label_2
 _geom_angle_atom_site_label_3
 _geom_angle
 _geom_angle_site_symmetry_1
 _geom_angle_site_symmetry_3
 _geom_angle_publ_flag
N2 Ag1 S1 132.44(5) . . ?
N2 Ag1 S2 106.09(5) . . ?
S1 Ag1 S2 100.984(14) . . ?
N2 Ag1 S1 105.54(5) . 2_755 ?
S1 Ag1 S1 99.981(12) . 2_755 ?
S2 Ag1 S1 111.090(14) . 2_755 ?
N2 Ag1 Ag1 136.61(5) . 2_755 ?
S1 Ag1 Ag1 51.341(9) . 2_755 ?
S2 Ag1 Ag1 115.500(10) . 2_755 ?
S1 Ag1 Ag1 48.640(8) 2_755 2_755 ?
C1 S1 Ag1 103.48(5) . . ?
C1 S1 Ag1 98.36(6) . 2_755 ?
Ag1 S1 Ag1 80.019(12) . 2_755 ?
C2 S2 Ag1 97.93(6) . . ?
N1 C1 S1 179.12(17) . . ?
O2 C8 C9 121.60(16) . . ?
O2 C8 C5 118.76(15) . . ?
C9 C8 C5 119.64(13) . . ?
C6 C5 C4 119.18(16) . . ?
C6 C5 C8 122.28(14) . . ?
C4 C5 C8 118.50(15) . . ?
C7 C6 C5 119.31(15) . . ?
C7 C6 H6 120.3 . . ?
C5 C6 H6 120.3 . . ?
N3 C7 C6 119.63(17) . . ?
N3 C7 H7 120.2 . . ?
C6 C7 H7 120.2 . . ?
C3 N3 C7 122.81(16) . . ?
C3 N3 H3 118.6 . . ?
C7 N3 H3 118.6 . . ?
N3 C3 C4 120.00(15) . . ?
N3 C3 H3A 120.0 . . ?
C4 C3 H3A 120.0 . . ?
C3 C4 C5 118.92(17) . . ?
C3 C4 H4 120.5 . . ?
C5 C4 H4 120.5 . . ?
C10 C9 C14 119.97(14) . . ?
C10 C9 C8 117.94(13) . . ?
C14 C9 C8 122.00(14) . . ?
C11 C10 C9 120.40(14) . . ?
C11 C10 H10 119.8 . . ?
C9 C10 H10 119.8 . . ?
C10 C11 C12 119.68(16) . . ?
C10 C11 H11 120.2 . . ?
C12 C11 H11 120.2 . . ?
C13 C12 C11 120.20(15) . . ?
C13 C12 H12 119.9 . . ?
C11 C12 H12 119.9 . . ?
C12 C13 C14 120.57(14) . . ?
C12 C13 H13 119.7 . . ?
C14 C13 H13 119.7 . . ?
C13 C14 C9 119.18(15) . . ?
C13 C14 H14 120.4 . . ?
C9 C14 H14 120.4 . . ?
N2 C2 S2 177.72(17) 1_655 . ?
C2 N2 Ag1 172.98(16) 1_455 . ?
 
loop_
 _geom_torsion_atom_site_label_1
 _geom_torsion_atom_site_label_2
 _geom_torsion_atom_site_label_3
 _geom_torsion_atom_site_label_4
 _geom_torsion
 _geom_torsion_site_symmetry_1
 _geom_torsion_site_symmetry_2
 _geom_torsion_site_symmetry_3
 _geom_torsion_site_symmetry_4
 _geom_torsion_publ_flag
O2 C8 C5 C6 145.55(18) . . . . ?
C9 C8 C5 C6 -35.6(2) . . . . ?
O2 C8 C5 C4 -32.1(2) . . . . ?
C9 C8 C5 C4 146.78(16) . . . . ?
C4 C5 C6 C7 -2.2(2) . . . . ?
C8 C5 C6 C7 -179.76(15) . . . . ?
C5 C6 C7 N3 -1.3(2) . . . . ?
C6 C7 N3 C3 3.2(2) . . . . ?
C7 N3 C3 C4 -1.5(2) . . . . ?
N3 C3 C4 C5 -2.1(3) . . . . ?
C6 C5 C4 C3 3.8(2) . . . . ?
C8 C5 C4 C3 -178.48(14) . . . . ?
O2 C8 C9 C10 -25.4(3) . . . . ?
C5 C8 C9 C10 155.76(16) . . . . ?
O2 C8 C9 C14 151.04(18) . . . . ?
C5 C8 C9 C14 -27.8(2) . . . . ?
C14 C9 C10 C11 0.2(3) . . . . ?
C8 C9 C10 C11 176.75(17) . . . . ?
C9 C10 C11 C12 -0.7(3) . . . . ?
C10 C11 C12 C13 0.5(3) . . . . ?
C11 C12 C13 C14 0.3(3) . . . . ?
C12 C13 C14 C9 -0.8(3) . . . . ?
C10 C9 C14 C13 0.6(2) . . . . ?
C8 C9 C14 C13 -175.84(16) . . . . ?
 
_refine_diff_density_max    0.271
_refine_diff_density_min   -0.184
_refine_diff_density_rms    0.046

_shelx_res_file
;

    JA2009_148_0m.res created by SHELXL-2014/7


TITL p1 in P1                    New: P-1
CELL  0.71073    6.0975    8.7626   14.6204    95.010   100.127    90.578
ZERR  2           0.0002    0.0004    0.0006     0.002     0.001     0.002
LATT 1
SFAC C  Ag N  O  S  H
UNIT 28 2 6 2 4 20
LIST 4 ! automatically inserted. Change 6 to 4 for CHECKCIF!!
L.S. 20
ACTA
BOND 0.5 $H
FMAP 2
PLAN 5
CONF
SIZE 0.45 0.23 0.18
WGHT    0.023400
FVAR       0.26218
MOLE 1
AG1   2    0.917183   -0.000313    0.104331    11.00000    0.01440    0.02046 =
         0.02340    0.00475    0.00439    0.00186
S1    5    1.093900    0.221161    0.035284    11.00000    0.01686    0.01677 =
         0.01718    0.00394   -0.00004   -0.00005
S2    5    1.227318   -0.046466    0.243783    11.00000    0.01636    0.03485 =
         0.01649    0.00847    0.00351    0.00158
N1    3    0.724675    0.387661   -0.043155    11.00000    0.02675    0.02069 =
         0.02407    0.00374    0.00196    0.00505
C1    1    0.875980    0.317980   -0.010949    11.00000    0.02276    0.01475 =
         0.01495    0.00100    0.00474    0.00037
O2    4    1.362767    0.425625    0.340771    11.00000    0.01806    0.04482 =
         0.03019    0.01009    0.00671   -0.00426
C8    1    1.179553    0.381410    0.351724    11.00000    0.01762    0.02422 =
         0.01756    0.00280    0.00397    0.00013
C5    1    0.979032    0.415760    0.281986    11.00000    0.01943    0.01899 =
         0.01376    0.00203    0.00472    0.00260
C6    1    0.795903    0.314732    0.256951    11.00000    0.02080    0.01762 =
         0.01577    0.00229    0.00179    0.00205
AFIX  43
H6    6    0.794344    0.222383    0.283744    11.00000   -1.20000
AFIX   0
C7    1    0.616486    0.353317    0.191815    11.00000    0.02168    0.02468 =
         0.01729    0.00091   -0.00001    0.00443
AFIX  43
H7    6    0.494611    0.286047    0.173549    11.00000   -1.20000
AFIX   0
N3    3    0.619341    0.488136    0.155214    11.00000    0.02959    0.02669 =
         0.01381    0.00338    0.00323    0.01118
AFIX  43
H3    6    0.503792    0.512664    0.117056    11.00000   -1.20000
AFIX   0
C3    1    0.794039    0.586091    0.175465    11.00000    0.04213    0.02386 =
         0.01701    0.00723    0.00784    0.00813
AFIX  43
H3A   6    0.790357    0.677438    0.147340    11.00000   -1.20000
AFIX   0
C4    1    0.980359    0.551639    0.238259    11.00000    0.03008    0.02137 =
         0.01845    0.00432    0.00792   -0.00198
AFIX  43
H4    6    1.104495    0.617641    0.251227    11.00000   -1.20000
AFIX   0
C9    1    1.150873    0.297200    0.433397    11.00000    0.01384    0.02165 =
         0.01399    0.00159    0.00062   -0.00015
C10   1    1.331167    0.216478    0.475548    11.00000    0.01281    0.03175 =
         0.01883    0.00407    0.00063    0.00324
AFIX  43
H10   6    1.461326    0.212180    0.450562    11.00000   -1.20000
AFIX   0
C11   1    1.317615    0.142341    0.554723    11.00000    0.01825    0.03329 =
         0.02037    0.00650   -0.00074    0.00519
AFIX  43
H11   6    1.437649    0.087607    0.582251    11.00000   -1.20000
AFIX   0
C12   1    1.122925    0.150451    0.592714    11.00000    0.02359    0.02882 =
         0.01510    0.00607    0.00063    0.00135
AFIX  43
H12   6    1.113716    0.101635    0.645947    11.00000   -1.20000
AFIX   0
C13   1    0.943571    0.230939    0.551377    11.00000    0.01626    0.02677 =
         0.01573    0.00268    0.00262    0.00005
AFIX  43
H13   6    0.814678    0.236231    0.577234    11.00000   -1.20000
AFIX   0
C14   1    0.954532    0.304369    0.471062    11.00000    0.01394    0.02020 =
         0.01523    0.00117    0.00134    0.00047
AFIX  43
H14   6    0.833146    0.357298    0.442972    11.00000   -1.20000
AFIX   0
C2    1    1.442497   -0.035859    0.189941    11.00000    0.01467    0.01809 =
         0.02039    0.00173    0.00002   -0.00054
N2    3    0.597587   -0.024998    0.154439    11.00000    0.01675    0.02814 =
         0.03593    0.00218    0.00734   -0.00121
HKLF 4

REM  p1 in P1                    New: P-1
REM R1 =  0.0174 for    2415 Fo > 4sig(Fo)  and  0.0182 for all    2483 data
REM    190 parameters refined using      0 restraints

END

WGHT      0.0234      0.0000

REM Highest difference peak  0.271,  deepest hole -0.184,  1-sigma level  0.046
Q1    1   0.8997  0.0273  0.0594  11.00000  0.05    0.27
Q2    1   0.9395 -0.0448  0.1517  11.00000  0.05    0.26
Q3    1   0.9365  0.2669  0.5091  11.00000  0.05    0.25
Q4    1   1.2203  0.1385  0.5733  11.00000  0.05    0.24
Q5    1   1.3145  0.1801  0.5170  11.00000  0.05    0.24
;
_shelx_res_checksum   16130

_shelx_hkl_file
;
   1   0   0  886.94   58.58
   1   0   0  902.57   61.79
   1   0   0  937.38   62.02
   1   0   0  879.92   61.61
   1   0   0  896.70   61.57
   1   0   0  885.44   62.53
   1   0   0  887.07   62.40
   1   0   0  862.67   61.36
   1   0   0  893.69   61.31
  -1   0   0  866.05   62.20
   1   0   0  963.72   62.43
   1   0   0  911.08   62.55
   1   0   0  925.92   61.08
   1   0   0  914.68   61.10
   1   0   0  930.41   64.42
   1   0   0  904.94   60.15
  -1   0   0  881.91   58.68
  -1   0   0  886.41   62.28
  -1   0   0  884.40   61.67
  -1   0   0  908.12   61.67
  -1   0   0  927.72   62.55
  -1   0   0  957.06   62.78
  -1   0   0  888.04   60.27
  -1   0   0  895.55   63.03
  -1   0   0  859.61   61.08
  -1   0   0  913.35   61.07
  -1   0   0  918.62   62.68
  -1   0   0  958.19   62.55
   2   0   0   38.81    2.59
  -2   0   0   38.61    2.70
   2   0   0   38.68    2.89
   2   0   0   39.46    2.65
  -2   0   0   41.78    2.74
  -2   0   0   37.87    2.72
  -2   0   0   37.00    2.66
  -2   0   0   36.94    2.66
   2   0   0   43.47    2.77
   2   0   0   37.50    2.74
  -2   0   0   37.31    2.89
  -2   0   0   38.98    2.64
  -2   0   0   38.23    2.80
  -2   0   0   36.62    2.59
  -2   0   0   37.61    2.69
  -2   0   0   37.24    2.73
  -2   0   0   37.79    2.73
   2   0   0   38.45    2.70
   2   0   0   37.89    2.72
   2   0   0   39.53    2.73
   2   0   0   37.80    2.74
   2   0   0   38.38    2.73
   2   0   0   39.16    2.67
   2   0   0   40.30    2.66
  -2   0   0   39.10    2.72
  -2   0   0   41.60    2.74
  -2   0   0   37.84    2.68
   3   0   0    0.49    0.14
   3   0   0    0.59    0.19
   3   0   0    0.43    0.14
   3   0   0    0.41    0.12
  -3   0   0    0.52    0.12
   3   0   0    0.35    0.11
  -3   0   0    0.79    0.15
  -3   0   0    0.56    0.15
  -3   0   0    0.49    0.20
  -3   0   0    0.52    0.19
  -3   0   0    0.50    0.12
  -3   0   0    0.37    0.15
  -3   0   0    0.48    0.15
  -3   0   0    0.56    0.09
  -3   0   0    0.36    0.14
  -3   0   0    0.66    0.17
   3   0   0    0.59    0.16
   3   0   0    0.38    0.14
   3   0   0    0.58    0.15
   3   0   0    0.34    0.13
   3   0   0    0.41    0.13
   3   0   0    0.58    0.16
  -4   0   0  106.64    7.43
  -4   0   0  105.89    7.40
  -4   0   0  103.34    7.61
  -4   0   0  103.58    7.06
  -4   0   0  112.68    7.42
  -4   0   0  110.43    7.35
  -4   0   0  106.61    8.53
  -4   0   0   98.19    7.83
   4   0   0  107.99    7.41
   4   0   0  103.61    7.40
  -4   0   0  110.25    7.47
   4   0   0  104.33    7.49
   4   0   0  106.53    7.32
   4   0   0  100.03    7.47
   4   0   0  111.82    7.86
   4   0   0  111.48    7.24
  -4   0   0  105.15    7.35
  -5   0   0   56.07    4.45
  -5   0   0   56.07    4.11
  -5   0   0   56.49    4.63
   5   0   0   57.08    4.30
   5   0   0   62.31    4.40
  -5   0   0   64.04    4.18
   5   0   0   56.24    4.32
   5   0   0   62.78    4.26
   5   0   0   63.72    4.26
  -5   0   0   60.59    4.30
  -5   0   0   59.90    4.28
  -5   0   0   59.94    5.02
  -5   0   0   58.95    4.38
  -5   0   0   61.29    4.35
   5   0   0   58.21    4.28
   6   0   0  148.69   10.01
  -6   0   0  145.28   11.52
  -6   0   0  151.90    9.98
  -6   0   0  142.75    9.54
  -6   0   0  136.76   10.60
  -6   0   0  135.50   10.26
   6   0   0  132.58   10.07
  -6   0   0  141.24   10.06
  -6   0   0  149.53   10.03
   6   0   0  141.15   10.13
  -7   0   0   87.43    7.41
   7   0   0   89.97    6.41
   7   0   0   82.87    6.48
  -7   0   0   92.03    6.95
  -7   0   0   87.46    6.61
  -7   0   0   90.80    6.14
  -7   0   0   87.36    6.51
   7   0   0   85.06    6.44
  -7   0   0   92.39    6.43
  -8   0   0    7.65    1.04
   8   0   0    6.98    0.94
  -8   0   0    7.22    1.18
   8   0   0    7.52    0.98
  -8   0   0    7.64    1.07
   8   0   0    6.66    0.90
   9   0   0    2.38    0.61
   9   0   0    2.40    0.63
  -9   0   0    3.25    0.90
   0  -1   0  315.49   21.70
   0   1   0  305.77   20.20
   0   1   0  300.45   24.03
   0   1   0  280.21   21.51
   0  -1   0  314.85   20.23
   0  -1   0  284.94   21.13
   0   1   0  305.22   21.23
   0  -1   0  306.18   21.18
   0   1   0  315.60   21.29
   0  -1   0  288.26   23.52
   0   1   0  309.92   21.77
  -1  -1   0  104.34    7.24
  -1  -1   0  102.73    7.15
   1   1   0  102.59    7.32
  -1  -1   0  112.39    7.33
   1   1   0  101.73    7.16
   1   1   0  107.30    7.15
  -1  -1   0   98.70    7.04
   1   1   0  105.20    6.89
  -1  -1   0  109.86    7.32
  -1  -1   0  103.29    7.32
  -1  -1   0  106.50    7.16
  -1  -1   0  103.82    7.58
  -1  -1   0  108.01    7.42
  -1  -1   0  105.87    7.26
   1   1   0  107.81    7.17
   1   1   0  105.41    7.24
   1   1   0  107.77    7.32
   1   1   0  108.21    7.25
   1   1   0  103.79    7.04
   1   1   0  108.06    7.31
  -2  -1   0   30.69    2.11
  -2  -1   0   29.05    2.03
  -2  -1   0   30.74    2.08
  -2  -1   0   30.20    2.14
  -2  -1   0   29.15    2.11
   2   1   0   31.59    2.16
   2   1   0   29.70    2.07
   2   1   0   28.76    2.09
  -2  -1   0   29.04    2.14
  -2  -1   0   29.51    2.15
   2   1   0   29.28    2.09
   2   1   0   30.48    2.08
  -2  -1   0   28.72    2.07
  -2  -1   0   29.90    2.20
   2   1   0   29.24    2.14
   2   1   0   28.17    2.13
  -2  -1   0   29.43    2.07
  -2  -1   0   29.71    2.13
  -2  -1   0   28.01    2.10
  -2  -1   0   28.08    2.24
   2   1   0   28.51    2.03
   2   1   0   31.03    2.16
   2   1   0   29.18    2.14
   2   1   0   30.74    2.14
  -4  -1   0   47.45    3.38
  -4  -1   0   48.99    3.41
  -4  -1   0   47.91    3.45
   4   1   0   49.88    3.36
   4   1   0   47.67    3.40
  -4  -1   0   46.93    3.39
  -4  -1   0   46.00    3.54
   4   1   0   45.61    3.43
  -4  -1   0   46.71    3.34
  -4  -1   0   47.72    3.30
  -4  -1   0   41.79    3.22
   4   1   0   48.83    3.65
  -4  -1   0   45.23    3.25
  -4  -1   0   48.88    3.42
   4   1   0   48.06    3.48
  -4  -1   0   45.34    3.26
  -4  -1   0   44.27    3.64
  -4  -1   0   51.45    3.34
  -4  -1   0   48.16    3.49
   4   1   0   43.80    3.42
  -6   1   0  275.07   18.61
  -6   1   0  267.40   17.72
   6  -1   0  287.84   18.89
  -6   1   0  262.96   19.64
   6  -1   0  275.12   18.63
   6  -1   0  251.33   18.78
  -6   1   0  262.76   19.05
  -6   1   0  264.16   21.36
  -6   1   0  258.99   18.64
  -6   1   0  286.88   18.46
  -6   1   0  280.64   18.49
  -7  -1   0   43.22    3.73
  -7  -1   0   43.59    3.26
   8  -1   0   31.62    2.73
  -8   1   0   34.03    2.65
  -8   1   0   33.48    2.87
   8  -1   0   33.61    2.74
  -8   1   0   34.32    3.32
  -8   1   0   33.68    2.86
   8  -1   0   33.60    2.82
   0  -2   0  449.47   31.05
   0  -2   0  428.96   34.42
   0   2   0  425.19   30.21
   0   2   0  457.19   34.58
   0   2   0  449.98   30.37
   0   2   0  430.34   30.34
   0  -2   0  421.53   30.19
   0   2   0  449.38   28.91
   0  -2   0  452.75   30.34
   0  -2   0  441.53   30.36
   0  -2   0  453.94   32.56
   0  -2   0  431.08   32.65
   0   2   0  493.85   30.38
   0  -2   0  441.97   28.88
   2  -2   0   41.42    2.93
   2   2   0   41.95    2.88
   2   2   0   41.53    2.95
  -2   2   0   41.18    3.45
  -2  -2   0   42.87    3.03
  -2  -2   0   43.81    2.98
   2   2   0   42.13    2.92
  -2  -2   0   43.93    3.03
  -2   2   0   41.50    3.00
  -2   2   0   39.88    2.79
  -2  -2   0   42.71    2.95
   2  -2   0   41.92    3.38
   2  -2   0   39.93    3.15
   2   2   0   44.43    3.04
   2   2   0   44.12    2.94
   2   2   0   42.06    2.99
   2   2   0   42.76    3.03
  -2  -2   0   40.77    3.15
   2   2   0   46.62    3.03
  -2  -2   0   42.83    3.01
  -2  -2   0   42.78    3.04
  -2  -2   0   42.74    3.01
  -2   2   0   40.19    2.93
  -2  -2   0   42.07    2.94
  -2   2   0   38.80    3.14
   2   2   0   43.09    3.03
   2  -2   0   43.81    2.94
  -2   2   0   40.31    2.93
  -4  -2   0   42.38    3.44
   4   2   0   43.41    3.17
   4   2   0   46.36    3.27
  -4  -2   0   47.29    3.14
   4   2   0   43.36    3.27
  -4  -2   0   45.59    3.26
   4   2   0   46.78    3.18
  -4  -2   0   42.80    3.09
  -4  -2   0   42.02    3.35
  -4  -2   0   44.00    3.20
   4   2   0   42.96    3.26
  -4  -2   0   39.21    3.07
   4   2   0   42.90    3.24
  -4  -2   0   43.97    3.23
   4   2   0   42.34    3.20
  -4  -2   0   46.94    3.24
  -4  -2   0   45.61    3.32
  -4  -2   0   43.24    3.13
  -5  -2   0    1.22    0.29
  -5  -2   0    1.13    0.27
  -5  -2   0    1.23    0.35
   5   2   0    1.05    0.29
   5   2   0    0.93    0.27
  -5  -2   0    1.16    0.36
  -5  -2   0    0.76    0.28
   5   2   0    1.12    0.34
  -5  -2   0    1.48    0.34
  -5  -2   0    1.52    0.33
   5   2   0    1.40    0.36
  -5  -2   0    2.01    0.32
   5   2   0    1.17    0.30
   5   2   0    1.20    0.30
  -5  -2   0    1.21    0.37
  -5  -2   0    1.21    0.23
  -5  -2   0    1.54    0.22
  -6   2   0  141.71   11.35
  -6   2   0  136.89    9.31
  -6   2   0  135.52    9.81
  -6   2   0  139.98    9.78
  -6   2   0  147.62    9.71
   6  -2   0  134.60    9.85
  -6   2   0  136.50   10.42
  -6   2   0  136.84   10.00
  -6   2   0  142.78    9.72
   6  -2   0  149.07    9.77
   6  -2   0  137.50    9.89
  -7   2   0   48.94    4.49
   7  -2   0   52.36    3.88
   7  -2   0   47.19    3.77
  -7   2   0   48.97    3.60
   7  -2   0   51.42    3.75
  -7   2   0   49.43    3.80
  -7   2   0   50.29    3.86
  -7   2   0   52.59    3.91
  -8   2   0    1.22    0.60
   9  -2   0   -0.05    0.37
  -9   2   0    0.01    0.34
   9   2   0    0.22    0.42
  -9   2   0   -0.03    0.39
  -9   2   0    0.13    0.58
   0   3   0  696.39   53.42
   0  -3   0  721.23   46.86
   0  -3   0  669.18   48.01
   0  -3   0  699.22   47.82
   0  -3   0  729.57   44.65
   0   3   0  699.12   46.90
   0   3   0  671.06   46.87
   0  -3   0  638.06   45.87
   0   3   0  643.32   46.50
   0  -3   0  695.65   46.88
   0  -3   0  681.91   47.95
   0   3   0  717.77   46.61
   0   3   0  689.57   44.64
   0  -3   0  717.14   48.02
  -1  -3   0  332.17   21.73
  -1  -3   0  327.60   22.84
   1   3   0  334.61   22.67
  -1  -3   0  326.43   22.92
   1   3   0  338.88   22.63
  -1  -3   0  313.88   22.81
  -1  -3   0  306.87   23.12
   1   3   0  339.53   23.09
  -1  -3   0  339.80   22.60
   1   3   0  338.42   23.12
   1   3   0  341.96   22.94
  -1  -3   0  357.51   22.62
   1   3   0  367.95   23.11
   1   3   0  330.06   22.85
   1   3   0  322.13   22.22
  -1  -3   0  349.87   23.12
  -1  -3   0  359.52   23.12
  -1  -3   0  320.58   22.24
  -1  -3   0  329.80   23.38
   1   3   0  334.15   22.85
  -1  -3   0  345.06   23.13
   1   3   0  336.84   21.76
   1   3   0  332.67   22.69
   1   3   0  344.46   23.12
   1   3   0  329.96   22.63
  -2  -3   0   35.86    2.57
   2   3   0   35.58    2.45
  -2  -3   0   35.95    2.48
   2   3   0   31.94    2.52
   2   3   0   33.52    2.44
  -2  -3   0   34.24    2.55
   2   3   0   35.41    2.51
  -2  -3   0   35.69    2.63
   2   3   0   37.60    2.45
  -2  -3   0   33.05    2.45
   2   3   0   35.04    2.53
   2   3   0   34.93    2.43
  -2  -3   0   34.53    2.52
   2   3   0   33.03    2.54
   2   3   0   35.71    2.50
  -2  -3   0   34.26    2.66
  -2  -3   0   34.92    2.54
  -3  -3   0   35.96    2.73
  -3  -3   0   38.56    2.75
   3   3   0   34.06    2.71
  -3  -3   0   38.37    2.79
  -3  -3   0   35.84    2.82
  -3  -3   0   37.20    2.66
  -3  -3   0   38.88    2.67
   3   3   0   37.51    2.70
   3   3   0   36.49    2.76
  -3  -3   0   33.81    2.62
   3   3   0   38.73    2.66
  -3  -3   0   37.83    2.76
  -3  -3   0   36.00    2.71
   3   3   0   38.84    2.64
   3   3   0   36.42    2.72
   3   3   0   38.11    2.76
  -3  -3   0   37.00    2.88
   3   3   0   35.26    2.64
   3   3   0   34.81    2.68
  -3  -3   0   39.13    2.71
  -3  -3   0   35.89    2.59
  -4  -3   0    4.04    0.53
   4   3   0    5.09    0.53
  -4  -3   0    4.98    0.60
   4   3   0    3.92    0.51
   4   3   0    3.64    0.51
  -4  -3   0    4.71    0.55
   4   3   0    4.45    0.58
  -4  -3   0    5.14    0.63
  -4  -3   0    4.60    0.53
   4   3   0    5.29    0.58
  -4  -3   0    4.86    0.59
   4   3   0    4.27    0.53
  -4  -3   0    4.55    0.49
  -4  -3   0    4.56    0.62
  -4  -3   0    5.34    0.57
  -4  -3   0    4.84    0.57
   4   3   0    4.48    0.60
  -4  -3   0    4.84    0.62
  -4  -3   0    4.78    0.54
  -4  -3   0    4.18    0.60
   4   3   0    5.02    0.63
  -6   3   0   62.80    4.52
  -6   3   0   62.47    4.98
  -6   3   0   58.47    4.55
  -6   3   0   61.46    4.32
   6  -3   0   64.00    4.59
   6  -3   0   61.85    4.55
  -6   3   0   66.06    4.53
  -6   3   0   61.15    5.39
  -6   3   0   65.41    4.65
  -6   3   0   64.00    4.55
  -9   3   0    0.28    0.57
  -9   3   0    0.19    0.35
   0  -4   0  422.23   29.15
   0  -4   0  434.02   30.36
   0   4   0  436.72   29.65
   0   4   0  421.10   29.64
   0   4   0  444.55   29.93
   0  -4   0  441.42   30.60
   0  -4   0  453.82   30.31
   0  -4   0  427.04   29.89
   0   4   0  431.15   34.09
   0  -4   0  466.13   30.39
   0   4   0  452.15   28.50
   0   4   0  433.18   29.91
   0  -4   0  465.08   30.33
  -1  -4   0  716.04   47.35
  -1  -4   0  721.62   47.32
  -1  -4   0  697.99   46.29
   1   4   0  732.74   47.39
   1   4   0  685.76   46.32
  -1  -4   0  656.45   47.34
   1   4   0  639.85   45.47
  -1  -4   0  700.55   46.26
  -1  -4   0  672.40   46.71
   1   4   0  697.44   44.52
   1   4   0  672.74   46.31
  -1  -4   0  714.23   44.48
   1   4   0  687.55   46.75
  -1  -4   0  695.78   46.70
  -1  -4   0  671.26   47.81
  -1  -4   0  732.24   47.32
  -1  -4   0  647.20   45.51
   1   4   0  687.51   47.36
   1   4   0  657.50   46.72
  -1  -4   0  701.71   46.93
  -2  -4   0  228.46   16.32
  -2  -4   0  253.17   15.97
  -2  -4   0  227.14   16.53
  -2  -4   0  225.41   15.72
   2   4   0  233.68   15.99
  -2  -4   0  240.02   16.20
   2   4   0  230.61   16.14
  -2  -4   0  242.41   15.36
  -2  -4   0  227.99   16.34
  -2  -4   0  236.94   15.94
   2   4   0  231.22   16.30
   2   4   0  244.93   16.18
  -2  -4   0  236.93   16.16
   2   4   0  225.71   15.90
   2   4   0  237.70   16.00
   2   4   0  239.14   16.30
   2   4   0  247.02   16.17
   2   4   0  237.38   15.40
  -3  -4   0    0.66    0.22
  -3  -4   0    0.40    0.21
   3   4   0    0.29    0.21
  -3   4   0    0.36    0.22
  -3   4   0    0.44    0.20
   3   4   0    0.17    0.19
   3   4   0    0.52    0.19
  -3   4   0    0.27    0.09
   3  -4   0    0.48    0.22
   3  -4   0    0.33    0.17
  -3  -4   0    0.26    0.19
  -3   4   0    0.13    0.07
   3   4   0    0.69    0.17
   3   4   0    0.34    0.18
  -3   4   0    0.17    0.08
   3   4   0    0.35    0.22
   3   4   0    0.31    0.15
   3   4   0    0.45    0.16
  -3  -4   0    0.47    0.21
  -3  -4   0    0.34    0.17
  -3  -4   0    0.22    0.18
   3   4   0    0.38    0.20
   3   4   0    0.37    0.18
  -3  -4   0    0.79    0.19
   3   4   0    0.32    0.18
  -3  -4   0    0.53    0.22
  -3  -4   0    0.30    0.17
  -4  -4   0   40.45    2.77
  -4  -4   0   37.99    2.75
  -4  -4   0   36.39    2.83
   4   4   0   33.86    2.78
   4   4   0   38.00    2.73
   4   4   0   37.05    2.79
  -4  -4   0   35.30    2.96
  -4  -4   0   36.46    2.94
   4   4   0   39.07    2.70
   4   4   0   37.08    2.87
   4   4   0   34.58    2.68
  -4  -4   0   35.76    2.80
  -4  -4   0   35.51    2.78
   4   4   0   36.30    2.76
  -4  -4   0   38.22    2.79
   4   4   0   37.26    2.79
  -4  -4   0   34.80    2.69
  -4  -4   0   36.97    2.86
   4   4   0   37.50    2.85
  -5  -4   0   50.02    4.01
  -5  -4   0   50.71    3.96
  -5  -4   0   50.85    3.60
  -5  -4   0   50.93    3.85
  -5  -4   0   51.16    3.80
   5   4   0   51.63    3.77
   5   4   0   49.66    3.77
  -5  -4   0   51.77    3.68
  -5  -4   0   49.94    3.72
  -5  -4   0   48.15    3.76
   5   4   0   48.43    3.64
  -5  -4   0   46.27    3.57
   5   4   0   50.19    3.73
   6   4   0   83.30    6.15
   6   4   0   83.13    6.27
  -6  -4   0   81.49    6.02
   6   4   0   82.57    6.34
  -6  -4   0   92.61    6.16
  -6  -4   0   86.76    6.23
  -6  -4   0   92.85    6.37
   6   4   0   86.97    6.34
  -6  -4   0   87.21    6.58
  -6  -4   0   85.69    6.72
  -6  -4   0   88.64    6.33
  -7   4   0   47.16    3.57
  -7   4   0   47.18    4.35
   7  -4   0   49.71    3.62
  -7   4   0   49.81    3.56
  -7   4   0   49.46    3.59
  -7   4   0   44.75    3.35
  -7   4   0   48.54    3.55
  -7   4   0   43.58    3.56
   0   5   0  477.02   31.64
   0  -5   0  493.75   32.31
   0  -5   0  458.14   31.08
   0  -5   0  470.10   32.65
   0   5   0  470.63   31.94
   0   5   0  467.26   31.93
   0   5   0  472.57   36.40
   0  -5   0  441.29   32.32
   0   5   0  471.49   30.41
   0   5   0  456.40   31.63
   0  -5   0  486.02   32.31
   0  -5   0  479.03   32.35
  -1   5   0  155.75   14.62
  -1   5   0  171.26   14.52
   1   5   0  193.55   12.70
  -1  -5   0  195.76   12.96
  -1  -5   0  188.92   13.13
   1   5   0  191.33   12.84
  -1  -5   0  197.18   12.84
  -1  -5   0  207.71   12.97
   1  -5   0  184.49   13.03
  -1  -5   0  197.31   12.64
  -1  -5   0  186.21   12.47
  -1   5   0  171.47   12.14
  -1   5   0  161.87   12.73
   1   5   0  201.73   12.25
   1   5   0  187.46   12.84
   1   5   0  189.53   12.40
  -1  -5   0  199.10   12.82
  -1  -5   0  201.64   12.65
   1   5   0  196.33   12.70
  -1   5   0  169.68   12.75
  -1  -5   0  182.50   12.95
  -1  -5   0  206.79   12.96
   1  -5   0  162.72   13.39
  -2  -5   0   51.98    3.76
   2   5   0   54.23    3.83
   2   5   0   54.61    3.69
  -2  -5   0   53.21    3.85
  -2  -5   0   53.86    3.77
   2   5   0   53.28    3.82
  -2  -5   0   54.90    3.66
   2   5   0   56.32    3.73
   2   5   0   49.62    3.66
  -2  -5   0   53.11    3.98
  -2  -5   0   54.03    3.91
   2   5   0   53.89    3.75
   2   5   0   52.50    3.90
   2   5   0   52.67    3.82
   2   5   0   54.27    3.68
  -2  -5   0   53.79    3.88
   2   5   0   56.01    3.91
  -2  -5   0   52.61    3.88
   2   5   0   55.64    3.83
   2   5   0   52.94    3.76
  -3  -5   0   10.69    1.00
   3   5   0   11.72    0.91
   3   5   0   10.19    1.03
   3   5   0   12.13    1.03
   3   5   0    9.89    0.84
  -3  -5   0    9.19    0.94
  -3  -5   0    9.50    0.95
  -3  -5   0    9.80    1.03
   3   5   0   10.09    0.92
  -3  -5   0   10.48    0.91
  -3  -5   0   10.19    1.00
  -3  -5   0   10.91    1.05
   3   5   0   11.43    0.87
  -3  -5   0    9.47    0.93
   3   5   0   10.67    0.93
   4   5   0   59.76    4.54
   4   5   0   65.47    4.81
  -4  -5   0   66.26    4.80
   4   5   0   73.37    4.59
  -4  -5   0   68.00    4.95
   4   5   0   67.31    4.74
  -4  -5   0   64.12    4.98
  -4  -5   0   64.42    4.73
  -4  -5   0   61.05    4.58
   4   5   0   66.69    4.78
   4   5   0   61.50    4.71
  -4  -5   0   65.94    4.64
  -4  -5   0   65.52    4.80
   4   5   0   60.37    4.63
  -4  -5   0   62.32    4.75
  -5   5   0  140.71    9.20
  -5   5   0  140.36    9.20
  -5   5   0  126.56    8.96
  -5   5   0  118.86   10.59
   5  -5   0  141.93    9.14
  -5   5   0  131.41    8.96
  -5   5   0  131.26    9.03
  -5   5   0  130.22    9.76
  -5   5   0  125.97    8.59
  -5   5   0  122.79    9.04
   5  -5   0  132.08    9.10
  -6   5   0   95.44    5.78
  -6  -5   0   72.58    5.80
   6   5   0   70.03    5.95
  -6   5   0   93.55    6.95
  -6   5   0   96.19    5.48
  -6  -5   0   68.77    6.17
  -6  -5   0   70.36    5.98
  -7   5   0   60.89    4.50
  -7   5   0   64.02    4.31
  -7   5   0   66.69    4.51
  -7   5   0   57.30    4.22
   7  -5   0   60.58    4.55
  -7   5   0   63.42    4.52
  -7   5   0   67.81    4.52
   7  -5   0   59.04    4.51
  -7   5   0   56.17    5.40
  -8   5   0    8.64    1.03
   8   5   0   10.33    1.22
   8   5   0   10.54    1.26
   8  -5   0    8.89    1.04
  -8   5   0    9.07    0.99
  -8   5   0    9.25    1.40
   8  -5   0    8.03    0.97
  -8   5   0    8.52    0.98
  -8   5   0    8.78    0.91
   8   5   0   10.08    1.13
   0  -6   0  128.43    8.84
   0   6   0  123.92    8.89
   0  -6   0  134.54    8.94
   0  -6   0  124.67    8.94
   0  -6   0  135.72    8.95
   0   6   0  131.74    8.48
   0   6   0  130.17    8.79
   0   6   0  128.48   10.16
   0   6   0  128.09    8.78
   0  -6   0  127.08    9.08
   0  -6   0  120.27    8.61
   0  -6   0  135.63    8.96
   0   6   0  127.98    8.89
   1   6   0   90.20    6.35
   1   6   0   90.17    6.05
   1   6   0   88.80    6.36
  -1  -6   0   91.35    6.37
  -1  -6   0   95.22    6.38
   1   6   0   88.81    6.26
  -1  -6   0   84.67    6.36
  -1  -6   0   91.13    6.30
  -1  -6   0   85.27    6.13
  -1  -6   0   91.15    6.49
  -1  -6   0   93.52    6.20
   1   6   0   90.82    7.19
   1   6   0   93.54    6.27
   3   6   0   39.15    2.81
   3   6   0   36.24    2.67
   3   6   0   34.69    2.51
  -3  -6   0   35.09    2.73
   3   6   0   36.14    2.82
  -3  -6   0   35.73    2.64
   3   6   0   36.93    2.67
  -3  -6   0   34.28    2.85
  -3  -6   0   37.20    2.79
  -3  -6   0   33.44    2.72
   3   6   0   33.85    2.71
   3   6   0   35.72    2.60
  -3  -6   0   33.65    2.75
   3   6   0   36.15    2.52
  -3  -6   0   34.84    2.66
  -3  -6   0   36.06    2.89
   3   6   0   38.35    2.70
   4   6   0   68.01    5.02
  -4  -6   0   73.10    5.29
   4   6   0   71.86    5.03
   4   6   0   66.60    4.82
  -4  -6   0   69.02    4.95
  -4  -6   0   66.31    4.91
   4   6   0   73.42    5.18
  -4  -6   0   64.71    5.07
   4   6   0   64.75    4.91
  -4  -6   0   69.92    5.06
  -4  -6   0   70.15    5.14
  -4  -6   0   72.02    5.35
   5   6   0   17.90    1.50
  -5  -6   0   18.09    1.66
   5   6   0   19.88    1.64
  -5  -6   0   19.88    1.75
  -5  -6   0   17.13    1.65
  -5  -6   0   18.52    1.82
  -5  -6   0   20.36    1.70
   5   6   0   17.26    1.55
   5   6   0   18.34    1.63
  -5  -6   0   19.02    1.83
  -5  -6   0   19.24    1.60
   6   6   0   27.78    2.37
  -6  -6   0   32.55    2.53
   6   6   0   29.48    2.46
  -6  -6   0   31.69    2.51
  -6  -6   0   30.86    2.73
   6   6   0   28.00    2.32
  -6  -6   0   30.40    2.54
  -6  -6   0   31.60    2.78
   6   6   0   29.13    2.49
  -6  -6   0   31.13    2.57
  -6  -6   0   27.82    2.33
  -7   6   0   22.17    1.65
  -7   6   0   20.04    1.70
  -7   6   0   18.28    2.20
  -7   6   0   19.66    1.63
  -7   6   0   20.98    1.69
  -7   6   0   21.16    1.56
  -7   6   0   19.73    1.57
   7  -6   0   19.48    1.65
  -8   6   0    8.89    0.90
  -8   6   0    8.45    0.98
  -8   6   0    8.77    0.89
  -8   6   0    8.03    1.36
  -8   6   0    9.20    0.87
   8  -6   0    7.85    0.92
   0   7   0   85.01    6.52
   0  -7   0   78.75    5.48
   0  -7   0   81.53    5.68
   0  -7   0   80.76    5.68
   0   7   0   82.06    5.42
   0  -7   0   88.84    5.70
   0  -7   0   75.45    5.76
   0   7   0   81.16    5.69
   0   7   0   79.21    5.59
   0   7   0   77.75    5.66
   0   7   0   76.97    5.58
   0  -7   0   82.35    5.60
  -2  -7   0   55.27    4.26
  -2  -7   0   54.13    4.17
   2   7   0   62.21    4.04
  -2  -7   0   57.56    4.03
   2   7   0   56.89    4.11
  -2  -7   0   54.59    4.11
  -2  -7   0   52.35    4.02
   2   7   0   58.49    4.13
   2   7   0   59.33    4.23
  -2  -7   0   55.72    4.16
   2   7   0   57.76    4.18
  -3  -7   0    0.16    0.22
  -3  -7   0    0.16    0.22
  -3  -7   0   -0.06    0.16
   3   7   0   -0.04    0.23
   3   7   0   -0.05    0.18
  -3  -7   0    0.06    0.23
  -3  -7   0   -0.01    0.18
  -3  -7   0    0.36    0.28
   3   7   0   -0.15    0.16
   3   7   0    0.11    0.24
  -3  -7   0   -0.03    0.16
   3   7   0   -0.18    0.22
  -4  -7   0   23.61    2.06
  -4  -7   0   24.30    1.97
  -4  -7   0   22.94    2.06
   4   7   0   26.30    1.99
  -4  -7   0   24.64    2.20
  -4  -7   0   25.23    2.06
   4   7   0   25.20    2.19
   4   7   0   22.81    1.78
  -4  -7   0   24.51    2.20
   4   7   0   26.37    1.98
   4   7   0   25.05    1.90
  -4  -7   0   24.81    2.12
   5   7   0    8.90    0.87
   5   7   0    9.51    0.93
  -5  -7   0    9.01    1.16
  -5  -7   0   11.68    1.27
  -5  -7   0    9.37    1.07
   5   7   0    9.34    1.01
  -5  -7   0   10.08    1.14
  -5  -7   0    9.73    1.01
  -5  -7   0    9.31    1.09
  -5  -7   0    9.27    1.07
   5   7   0    9.52    0.99
  -7   7   0    5.11    0.53
  -7  -7   0    6.58    1.11
  -7   7   0    5.07    0.64
  -7   7   0    5.20    0.63
  -7  -7   0    6.73    0.89
   7   7   0    6.18    0.78
  -7  -7   0    6.22    0.93
  -7   7   0    4.88    0.51
  -7   7   0    5.24    0.51
  -7   7   0    5.07    0.53
  -7   7   0    5.02    1.04
   0  -8   0   45.80    3.33
   0   8   0   46.78    3.41
   0   8   0   50.37    3.99
   0   8   0   48.54    3.50
   0  -8   0   46.04    3.43
   0   8   0   48.02    3.46
   0  -8   0   49.22    3.44
   0  -8   0   45.96    3.49
   0   8   0   47.78    3.42
   0   8   0   47.99    3.33
  -1   8   0   25.37    2.16
   2   8   0   49.94    3.52
  -2  -8   0   50.89    3.51
  -2  -8   0   45.37    3.63
  -2  -8   0   47.10    3.52
   2   8   0   48.15    3.68
   2   8   0   49.51    3.61
   2   8   0   50.19    4.11
   2   8   0   47.54    3.63
  -2  -8   0   46.64    3.71
   2   8   0   48.79    3.59
  -2  -8   0   45.59    3.60
  -2  -8   0   49.06    3.59
  -3  -8   0    1.07    0.38
  -3   8   0    1.57    0.46
   3   8   0    0.66    0.35
  -3  -8   0    1.23    0.32
  -3  -8   0    1.05    0.36
   3   8   0    0.92    0.36
  -3  -8   0    0.82    0.31
  -3  -8   0    1.23    0.36
  -3  -8   0    1.20    0.34
  -4  -8   0    9.08    1.11
  -4  -8   0    9.48    1.07
  -4  -8   0    8.76    1.02
  -4  -8   0    9.70    1.15
  -4  -8   0    9.35    1.05
  -4  -8   0    9.01    0.95
  -4  -8   0    8.77    1.01
  -5  -8   0   14.11    1.43
  -5  -8   0   14.01    1.53
  -5  -8   0   12.58    1.36
   5   8   0   13.65    1.18
  -5  -8   0   13.29    1.50
  -5  -8   0   12.43    1.39
   5   8   0   13.19    1.02
  -5  -8   0   12.91    1.29
  -5  -8   0   13.49    1.40
   6   8   0   34.54    2.54
  -6   8   0   29.96    2.31
  -6   8   0   29.40    2.31
  -6   8   0   26.18    3.06
  -6  -8   0   37.18    2.91
  -6  -8   0   34.30    2.81
  -6  -8   0   35.27    3.02
  -6  -8   0   31.82    2.71
  -7   8   0   13.01    1.73
  -7   8   0   13.69    1.16
   7   8   0   14.15    1.36
  -7   8   0   12.52    1.15
  -7  -8   0   13.10    1.46
  -7  -8   0   12.41    1.52
   0   9   0   79.92    5.43
   0  -9   0   77.31    5.49
   0  -9   0   75.13    5.68
   0   9   0   78.11    5.61
   0  -9   0   84.90    5.70
   0   9   0   81.20    5.63
   0   9   0   78.18    5.70
   0   9   0   78.79    5.67
   0   9   0   84.62    6.50
   1   9   0   98.87    6.95
  -1  -9   0   99.52    6.86
  -1  -9   0   94.49    6.69
  -1  -9   0  100.91    6.94
  -1  -9   0   97.36    6.94
   1   9   0   98.91    6.84
   1   9   0   98.53    6.90
   1   9   0  104.14    6.63
   1   9   0   99.91    6.85
   1  -9   0   78.74    6.75
  -2  -9   0   29.66    2.47
  -2  -9   0   30.04    2.40
  -2  -9   0   29.88    2.43
   2   9   0   31.35    2.49
   2   9   0   31.71    2.55
   2   9   0   34.09    2.85
  -2  -9   0   29.16    2.44
  -3  -9   0    0.48    0.31
  -3  -9   0    0.52    0.33
   3   9   0    0.83    0.42
  -3  -9   0    0.63    0.29
  -3  -9   0    0.69    0.31
   3   9   0    0.98    0.41
  -4  -9   0   41.62    3.43
   4   9   0   43.29    3.81
  -4  -9   0   44.74    3.58
  -4  -9   0   43.40    3.27
  -4  -9   0   38.93    3.35
  -4  -9   0   41.65    3.37
  -5  -9   0   44.05    3.67
  -5  -9   0   41.92    3.81
  -5  -9   0   45.62    3.55
  -5   9   0   50.27    4.30
  -5  -9   0   45.47    3.72
  -5  -9   0   48.08    3.79
  -6   9   0   36.08    2.45
  -6  -9   0   26.35    2.91
  -6   9   0   36.64    2.47
  -6   9   0   35.35    3.43
  -7   9   0   15.66    1.99
   0  10   0   46.20    3.40
   0 -10   0   45.51    3.30
   0  10   0   45.34    3.27
   0 -10   0   43.69    3.39
   0  10   0   44.53    3.42
   0  10   0   46.70    3.40
   0 -10   0   48.33    3.41
   0  10   0   45.52    3.38
  -1 -10   0   27.91    2.29
  -1 -10   0   27.38    2.35
  -1 -10   0   30.14    2.36
   1  10   0   29.42    2.37
   1  10   0   32.04    2.77
   1  10   0   30.18    2.37
   1  10   0   30.62    2.32
   1  10   0   29.00    2.40
   1  10   0   28.55    2.37
  -2  10   0    8.85    0.77
  -2  10   0    9.13    0.73
   2 -10   0    8.83    0.73
  -2  10   0    8.33    0.76
  -2  10   0    8.18    0.71
  -3 -10   0    3.67    0.65
   3  10   0    3.91    0.75
   3  10   0    3.53    0.71
  -3 -10   0    3.29    0.61
  -3  10   0    2.40    0.30
  -3  10   0    2.10    0.29
  -3 -10   0    3.38    0.58
  -3 -10   0    4.50    0.78
  -4 -10   0   26.66    2.44
  -4 -10   0   28.67    2.53
  -4 -10   0   28.54    2.48
   4  10   0   29.59    2.82
  -5 -10   0   15.59    1.65
  -5 -10   0   13.89    1.62
  -5 -10   0   15.25    1.70
   5  10   0   17.47    1.93
  -6  10   0   19.01    2.22
   0  11   0    0.13    0.23
   0  11   0    0.20    0.26
   0 -11   0    0.27    0.23
   0  11   0    0.07    0.23
   0 -11   0   -0.02    0.22
   0  11   0    0.09    0.22
  -1  11   0    9.14    0.87
   1 -11   0    7.61    0.82
  -1  11   0    8.12    0.80
   1 -11   0    8.39    0.82
  -1  11   0    8.67    0.85
  -1  11   0    8.21    0.83
   1 -11   0    9.29    0.85
  -1  11   0    8.11    0.85
  -4 -11   0    2.30    0.57
  -4 -11   0    1.56    0.58
  -4 -11   0    1.51    0.58
   4  11   0    2.37    0.78
  -5 -11   0    3.57    0.81
   5  11   0    3.97    1.00
   0  12   0    5.48    0.74
   0 -12   0    6.34    0.78
   0  12   0    6.30    0.78
   0 -12   0    5.32    0.76
   0  12   0    6.17    0.81
   1  12   0    9.68    1.22
  -1  12   0   13.62    1.20
  -1  12   0   13.07    1.12
  -1  12   0   13.60    1.20
   1  12   0   10.23    1.24
  -1  12   0   13.70    1.13
  -1 -12   0   10.37    1.23
  -1  12   0   13.43    1.10
   1 -12   0   12.16    1.15
  -1 -12   0   10.16    1.21
  -2  12   0    4.98    0.62
  -2  12   0    5.02    0.63
  -2  12   0    5.20    0.51
  -2  12   0    5.06    0.48
  -3 -12   0    2.63    0.69
  -3 -12   0    2.55    0.65
  -4  12   0    6.29    0.57
   0 -13   0   27.75    2.37
   0  13   0   28.26    2.38
   0 -13   0   28.26    2.36
  -1  13   0   21.82    1.90
  -1  13   0   22.80    1.81
   1 -13   0   21.71    1.91
  -2  13   0    1.16    0.37
  -2  13   0    0.80    0.31
   0   0   1  331.06   26.06
   0   0  -1  339.66   23.03
   0   0   1  310.25   22.91
   1   0  -1   90.05    6.39
   1   0  -1   97.24    6.61
  -1   0   1   97.20    6.48
  -1   0   1   88.41    6.60
  -1   0   1   93.83    6.31
  -1   0   1   93.83    6.40
   1   0  -1   90.16    6.45
  -1   0   1   92.67    6.46
   1   0  -1   94.16    6.54
  -1   0   1   95.81    6.53
  -1   0   1   91.14    6.55
  -1   0   1   91.41    6.15
  -1   0   1  101.04    6.55
   1   0  -1   94.02    6.39
   1   0  -1   96.24    6.48
   1   0  -1   96.16    6.53
   1   0  -1  100.74    7.38
   1   0  -1   92.19    6.29
   1   0  -1   93.75    6.77
  -1   0   1   92.98    7.38
   1   0  -1   93.31    6.53
  -1   0   1   89.55    6.45
   1   0  -1   93.85    6.54
   1   0  -1  101.57    6.47
   1   0  -1   93.91    6.15
   1   0  -1   97.17    6.39
   1   0  -1   89.23    6.45
  -1   0   1   93.10    6.55
  -1   0   1   93.73    6.40
  -1   0   1   94.22    6.47
  -1   0   1   98.02    6.51
  -3   0   1  336.59   22.09
   3   0  -1  344.96   22.69
  -3   0   1  324.49   21.62
   3   0  -1  324.13   22.46
   3   0  -1  334.53   22.43
   3   0  -1  319.04   22.67
   3   0  -1  337.69   22.99
  -3   0   1  336.07   22.70
  -3   0   1  334.82   22.96
  -3   0   1  336.07   22.49
  -3   0   1  344.01   22.88
  -3   0   1  317.90   22.70
   3   0  -1  352.30   22.98
   3   0  -1  344.05   22.11
   3   0  -1  340.29   22.77
   3   0  -1  335.36   23.80
  -3   0   1  303.93   23.78
   3   0  -1  341.93   22.97
  -3   0   1  349.17   22.97
  -3   0   1  316.72   23.22
  -3   0   1  334.28   22.49
   3   0  -1  335.29   21.60
   3   0  -1  317.46   22.96
  -3   0   1  341.95   25.96
  -5   0  -1   63.04    5.25
   5   0   1   64.78    4.45
  -5   0  -1   56.26    4.80
   5   0   1   59.04    4.55
  -5   0  -1   61.01    4.48
   5   0   1   66.69    4.44
  -5   0  -1   65.45    4.36
   5   0   1   60.75    4.49
  -5   0  -1   64.94    4.59
  -5   0  -1   65.48    4.53
  -5   0  -1   60.03    4.64
  -5   0  -1   60.91    4.29
  -5   0  -1   62.71    4.45
   5   0   1   60.35    4.52
   5   0   1   61.84    4.48
  -6   0   1  183.30   11.05
  -6   0  -1  134.58   12.72
   6   0   1  143.69   10.96
  -6   0  -1  135.03   11.06
  -6   0  -1  133.74   10.52
  -6   0  -1  135.23   10.98
   6   0  -1  173.22   11.26
   6   0   1  135.12   11.22
   6   0   1  134.85   11.06
  -6   0   1  176.64   11.82
  -6   0   1  167.71   11.41
   6   0  -1  167.61   11.22
  -6   0   1  185.46   11.09
   6   0  -1  179.42   11.12
  -6   0  -1  133.15   11.35
  -6   0   1  181.98   12.79
  -6   0   1  180.27   10.63
  -6   0   1  182.14   11.22
  -7   0  -1   44.82    3.32
  -7   0  -1   44.97    3.85
   7   0   1   43.00    3.47
   7   0   1   48.19    3.47
  -7   0  -1   47.29    3.53
   7   0   1   43.36    3.51
  -7   0  -1   41.94    3.53
  -7   0  -1   44.45    3.61
  -7   0  -1   44.88    4.10
   8   0   1    2.85    0.63
  -8   0  -1    2.77    0.79
   8   0   1    2.34    0.54
   8   0   1    2.05    0.52
  -8   0  -1    2.75    0.65
  -9   0   1   18.34    2.12
   9   0  -1   17.87    1.76
   9   0  -1   16.39    1.70
   0  -1  -1  144.48   10.44
   0  -1  -1  144.71   10.61
   0   1   1  147.26   10.48
   0  -1  -1  144.43   10.24
   0  -1  -1  148.48   10.35
   0   1   1  142.86   10.16
   0  -1  -1  154.81   10.43
   0  -1  -1  150.42   11.63
   0  -1  -1  149.41   10.18
   0  -1  -1  156.72   10.48
   0  -1  -1  152.29   10.60
   0   1   1  149.04   10.49
   0  -1  -1  152.31   10.42
   0  -1  -1  151.86    9.76
   0   1   1  151.00   10.17
   0   1   1  155.11   10.28
   0   1   1  147.77   10.10
   0  -1  -1  148.44   10.24
   0   1   1  145.34   11.65
   0  -1  -1  132.02   10.13
   0  -1  -1  142.55   10.04
   0   1   1  155.53    9.78
   0  -1  -1  159.18   10.44
   0   1   1  158.02   10.52
   0  -1  -1  149.58   10.44
  -1  -1  -1  493.32   33.11
  -1  -1  -1  475.87   33.55
  -1  -1  -1  481.42   33.08
  -1  -1  -1  522.76   33.52
   1   1  -1  502.00   33.11
   1   1  -1  488.14   33.12
  -1  -1  -1  498.82   33.82
   1   1  -1  488.90   35.06
   1   1  -1  471.74   32.54
   1   1  -1  486.82   33.87
   1   1  -1  542.78   33.85
  -1  -1  -1  504.58   33.11
   1   1  -1  520.14   33.53
   1   1  -1  463.72   31.80
   1   1  -1  522.53   34.18
  -1  -1  -1  489.60   33.12
   1   1  -1  470.11   33.12
  -1  -1  -1  476.99   33.38
  -1  -1  -1  470.09   33.84
   1   1   1  485.21   33.10
  -1  -1   1  485.94   33.10
   1   1   1  477.58   31.80
  -1  -1   1  489.82   33.42
  -1  -1   1  465.25   33.85
  -1  -1   1  457.75   33.54
  -1  -1   1  509.21   33.83
   1   1   1  471.02   33.85
   1   1   1  513.97   33.83
   1   1   1  474.03   32.53
  -1  -1   1  499.48   33.14
  -1  -1   1  513.54   33.52
   1   1   1  533.36   33.53
  -1  -1   1  479.51   35.09
  -1  -1   1  496.49   33.12
  -1  -1   1  499.53   33.83
   1   1   1  510.27   33.82
   1   1   1  527.53   33.10
   1   1   1  482.25   33.12
  -1  -1   1  488.90   33.10
   1   1   1  485.51   33.40
  -1  -1   1  468.21   32.56
  -2   1   1  110.50    8.73
  -2  -1  -1  106.35    8.02
  -2   1   1  106.88    7.52
  -2   1   1  106.37    7.78
  -2  -1  -1  105.02    7.27
  -2  -1  -1  125.85    7.75
  -2   1   1  110.32    7.53
  -2  -1  -1  109.83    7.72
  -2   1   1  102.22    7.24
  -2   1   1  103.35    8.01
  -2  -1  -1  112.86    7.55
  -2   1   1  103.77    7.60
  -2  -1  -1  108.22    7.44
  -2   1   1  106.34    7.61
  -2  -1  -1  115.37    7.67
  -2  -1  -1  102.99    7.52
  -2  -1  -1  113.67    7.74
   2  -1  -1  116.84    7.70
   2   1   1  112.04    7.73
   2   1   1  113.99    7.66
   2  -1  -1  113.58    7.71
   2  -1  -1  113.00    8.70
   2   1   1  117.69    7.57
   2   1   1  111.43    7.28
   2   1   1  110.55    7.56
   2   1   1  111.05    7.65
   2  -1  -1  113.58    7.69
   2  -1  -1  114.53    7.41
   2  -1  -1  105.30    7.69
   2   1   1  111.98    7.45
   2  -1  -1  108.50    8.01
   2  -1  -1  107.91    7.59
   2  -1  -1  110.47    7.60
   2   1   1  109.68    7.74
   2   1   1  116.39    7.72
   2  -1  -1  110.69    7.78
   2   1   1  113.98    7.53
   2   1   1  116.20    7.65
   2   1   1  122.26    7.76
   3   1  -1  396.57   24.06
   3   1  -1  348.77   23.75
   3   1  -1  374.59   23.85
   3  -1   1  324.01   24.88
   3  -1   1  327.89   23.99
   3  -1   1  317.37   23.69
   3   1  -1  382.73   23.15
   3   1  -1  382.53   23.53
   3  -1   1  354.97   24.02
   3   1  -1  391.13   24.91
   3  -1   1  326.02   23.44
   3   1  -1  347.78   24.05
   3  -1   1  315.83   24.00
   3  -1   1  324.95   23.47
   3   1  -1  385.75   23.50
   3  -1   1  332.31   23.78
   3   1  -1  374.59   23.77
   3   1  -1  372.53   22.62
   3  -1   1  336.38   23.10
   3  -1   1  342.85   24.04
  -3  -1   1  368.64   22.64
  -3  -1   1  361.16   24.91
  -3  -1   1  361.71   24.34
  -3   1  -1  309.64   22.57
  -3  -1   1  356.73   23.82
  -3  -1   1  384.55   24.07
  -3   1  -1  321.26   23.49
  -3  -1   1  349.79   24.03
  -3  -1   1  375.69   23.14
  -3  -1   1  383.51   23.57
  -3  -1   1  354.78   23.78
  -3   1  -1  294.56   24.86
  -3  -1   1  345.96   23.47
  -3   1  -1  333.18   24.28
  -3  -1   1  372.23   23.55
  -3   1  -1  323.99   27.16
  -3   1  -1  324.29   23.71
  -3   1  -1  318.64   23.50
  -3   1  -1  308.48   23.71
  -4   1   1  111.12    8.17
  -4   1   1  112.69    7.99
  -4   1   1  112.71    9.18
  -4   1   1  110.35    8.45
  -4   1   1  115.15    7.90
  -4   1   1  113.76    7.90
  -4   1   1  111.16    7.60
  -4   1   1  110.08    7.99
   4  -1  -1  116.37    7.96
   4  -1  -1  122.45    7.87
   4  -1  -1  119.14    8.47
   4  -1  -1  112.44    8.04
   4  -1  -1  121.47    7.77
   4  -1  -1  112.70    8.05
   4  -1  -1  111.70    7.94
   4  -1  -1  127.36    8.09
   5   1  -1   80.57    5.95
   5   1  -1   80.29    5.86
   5   1  -1   77.24    5.91
   5   1  -1   88.52    5.77
   5   1  -1   81.75    5.80
   5   1  -1   78.74    5.87
  -5  -1   1   85.29    5.84
  -5  -1   1   85.34    5.93
  -5  -1   1   76.01    6.23
  -5  -1   1   82.47    5.85
  -5  -1   1   79.92    6.07
  -5  -1   1   85.98    5.72
  -5  -1   1   82.38    5.66
  -5  -1   1   82.28    5.63
  -5  -1   1   83.91    5.85
  -5  -1   1   89.45    5.89
  -5  -1   1   78.73    5.93
  -5  -1   1   86.39    6.77
   6  -1   1   56.66    4.33
   6  -1   1   58.38    4.39
   6  -1   1   61.21    4.31
  -6   1  -1   57.04    4.31
  -6   1  -1   56.86    5.08
  -6   1  -1   57.73    4.40
  -6   1  -1   58.45    4.13
  -6   1  -1   63.66    4.32
  -6   1  -1   57.58    4.71
  -6   1  -1   57.95    4.47
  -6   1  -1   62.18    4.37
  -7   1   1   22.46    2.15
  -7  -1  -1   31.13    2.69
  -7   1   1   24.13    2.51
  -7  -1  -1   29.66    2.37
  -7   1   1   23.28    2.37
  -7   1   1   25.34    2.15
  -7   1   1   23.62    2.02
  -7   1   1   24.12    2.19
   7  -1  -1   21.83    2.10
   7  -1  -1   22.34    2.07
   7   1   1   28.97    2.28
   7   1   1   28.28    2.20
   7  -1  -1   24.28    2.07
   7   1   1   29.12    2.18
  -8   1   1    6.50    0.96
  -8  -1  -1    7.98    1.08
  -8   1   1    6.65    1.14
  -8   1   1    5.36    0.82
  -8   1   1    6.49    0.94
  -8  -1  -1    9.29    1.29
   8   1   1    8.66    0.99
   8   1   1    9.13    1.02
   8  -1  -1    6.07    0.87
   8  -1  -1    6.93    0.94
   8  -1  -1    6.09    0.88
   8   1   1    9.05    1.07
   9   1  -1   17.10    1.69
   9   1  -1   15.67    1.67
   1   2  -1   43.04    2.92
  -1  -2  -1   40.72    2.80
   1   2  -1   39.22    2.85
  -1  -2  -1   40.23    2.81
   1   2  -1   41.30    2.80
  -1  -2  -1   40.09    2.87
   1   2  -1   41.94    2.82
  -1  -2  -1   41.32    2.79
   1   2  -1   42.48    2.86
  -1  -2  -1   39.01    2.83
   1   2  -1   38.23    2.74
  -1  -2  -1   39.47    2.70
  -1  -2  -1   41.16    2.87
   1   2  -1   41.11    2.71
   1   2  -1   42.51    2.85
  -1  -2  -1   40.46    2.86
   1   2  -1   39.40    2.84
   1   2  -1   43.37    2.85
  -1  -2  -1   41.83    2.87
   1   2  -1   42.18    2.83
  -1  -2  -1   38.81    2.86
  -1  -2  -1   39.99    2.84
   1   2  -1   39.08    2.77
  -1  -2  -1   37.65    2.76
  -1  -2   1   39.09    2.85
  -1  -2   1   43.32    2.86
  -1  -2   1   40.79    2.84
  -1  -2   1   39.59    2.75
   1   2   1   39.13    2.85
   1   2   1   40.21    2.85
  -1  -2   1   40.41    2.70
   1   2   1   40.26    2.87
  -1  -2   1   39.06    2.79
  -1  -2   1   40.11    2.83
   1   2   1   38.97    2.78
   1   2   1   39.94    2.83
   1   2   1   40.58    2.81
   1   2   1   40.34    2.71
   1   2   1   40.92    2.78
  -1  -2   1   41.13    2.92
  -1  -2   1   41.34    2.85
  -1  -2   1   41.75    2.85
  -1  -2   1   40.32    2.78
   1   2   1   39.28    2.85
   1   2   1   37.67    2.75
   1   2   1   43.47    2.86
  -1  -2   1   39.19    2.77
   1   2   1   40.01    2.82
  -1  -2   1   38.85    2.85
  -2  -2  -1  145.86   10.11
  -2  -2  -1  146.95    9.59
  -2  -2  -1  140.03   10.56
  -2  -2  -1  147.37   10.21
  -2  -2  -1  149.50    9.96
  -2  -2  -1  138.54    9.93
  -2  -2  -1  142.23   10.06
   2   2   1  148.76   10.20
   2   2   1  147.18   10.18
   2   2   1  145.63    9.60
   2   2   1  148.00   10.10
   2   2   1  154.48    9.94
   2   2   1  147.65    9.81
   2   2   1  140.76    9.95
   2   2   1  138.86   10.08
   2   2   1  163.69   10.19
   2   2   1  147.92   10.08
   3   2  -1  211.35   14.84
   3   2  -1  202.27   15.76
   3   2  -1  216.05   15.62
   3   2  -1  208.93   15.59
  -3  -2  -1  257.35   15.23
  -3  -2  -1  248.11   15.41
   3   2  -1  219.61   16.32
  -3  -2  -1  249.75   16.40
  -3  -2  -1  256.31   15.62
  -3  -2  -1  252.95   15.49
  -3  -2  -1  255.60   15.67
   3   2  -1  207.43   15.37
   3   2  -1  207.79   15.42
   3   2  -1  220.33   15.18
   3   2  -1  209.39   15.59
  -3  -2  -1  255.07   15.81
  -3  -2  -1  248.61   15.66
   3   2  -1  206.24   15.76
  -3  -2  -1  249.24   14.88
   3   2  -1  210.22   15.40
   3   2   1  260.20   15.64
  -3  -2   1  224.66   15.44
  -3  -2   1  213.56   15.17
   3   2   1  252.50   15.47
  -3  -2   1  210.28   15.60
  -3  -2   1  211.90   16.33
  -3  -2   1  220.82   15.40
   3   2   1  250.62   15.64
  -3  -2   1  216.65   15.98
  -3  -2   1  213.87   15.63
   3   2   1  252.81   15.80
  -3  -2   1  204.39   15.37
  -3  -2   1  209.35   15.76
  -3  -2   1  218.75   14.85
  -3  -2   1  213.64   15.59
  -3  -2   1  216.37   15.78
  -3  -2   1  228.19   15.46
   3   2   1  248.07   15.66
   4   2  -1  143.86    9.46
   4   2  -1  131.68    9.42
   4   2  -1  143.38    9.20
   4   2  -1  141.85    9.90
   4   2  -1  133.37    9.29
   4   2  -1  134.32    9.51
   4   2  -1  131.46    9.52
   4   2  -1  131.49    9.42
  -4  -2   1  135.76    9.50
  -4  -2   1  128.93    9.68
  -4  -2   1  128.10    9.21
  -4  -2   1  132.12    9.46
  -4  -2   1  131.98    9.39
  -4  -2   1  140.77    9.53
  -4  -2   1  133.25    9.91
  -4  -2   1  139.73    9.36
  -4  -2   1  137.82    9.16
  -4  -2   1  139.23    9.26
  -4  -2   1  135.68    8.99
   5  -2   1   38.51    2.80
   5  -2   1   36.52    2.83
   5  -2   1   37.99    2.87
   5  -2   1   40.48    2.80
   5  -2   1   42.06    2.83
  -5   2  -1   36.91    3.15
  -5   2  -1   36.39    3.40
  -5   2  -1   43.63    2.97
  -5   2  -1   37.17    2.93
  -5   2  -1   38.04    2.81
  -5   2  -1   37.45    2.83
  -5   2  -1   38.52    2.86
  -5   2  -1   37.12    2.71
  -5   2  -1   37.95    2.90
  -6   2   1   22.24    1.88
  -6  -2  -1   27.49    2.04
  -6   2   1   23.08    1.96
  -6   2   1   21.75    2.20
  -6   2   1   22.66    2.02
  -6   2   1   25.18    2.02
  -6  -2  -1   27.38    2.35
  -6   2   1   23.95    1.99
  -6  -2  -1   26.50    2.20
  -6  -2  -1   27.04    1.87
  -6  -2  -1   26.34    2.25
  -6   2   1   23.00    2.38
  -6  -2  -1   27.62    2.01
  -6   2   1   21.64    2.00
  -6  -2  -1   29.02    2.51
   6  -2  -1   25.00    2.02
   6   2   1   27.17    2.15
   6  -2  -1   22.30    1.91
   6   2   1   24.68    2.04
   6  -2  -1   22.35    1.95
   6   2   1   24.45    2.05
   6   2   1   27.31    2.07
  -7   2   1   32.08    2.37
  -7   2   1   29.17    2.37
  -7   2   1   30.12    2.80
  -7   2   1   30.54    2.23
  -7  -2  -1   24.44    2.47
  -7   2   1   28.77    2.35
  -7   2   1   29.36    2.64
  -7  -2  -1   26.46    2.77
   7  -2  -1   31.20    2.30
   7   2   1   25.30    2.39
   7   2   1   25.37    2.34
   7   2   1   28.05    2.34
   7  -2  -1   28.68    2.32
   7   2   1   26.65    2.35
   7  -2  -1   27.92    2.28
   8   2  -1    9.43    1.12
   8   2  -1    9.33    1.15
   8   2  -1   10.74    1.21
  -8  -2   1   11.13    1.43
  -8  -2   1    9.20    1.23
   9   2   1   17.19    1.78
   1   3  -1   95.84    6.82
   1   3  -1  103.13    6.94
   1   3  -1   99.76    6.91
   1   3  -1   95.56    6.79
   1   3  -1  100.30    6.91
   1   3  -1  105.26    7.07
   1   3  -1  108.23    6.94
   1   3  -1   97.91    6.86
   1   3  -1   94.82    6.87
   1   3  -1   93.85    6.67
   1   3  -1  110.04    6.96
   1   3  -1   96.83    6.94
   1   3  -1  104.50    6.80
   1   3  -1  100.18    6.58
   1   3  -1   98.38    6.82
  -1  -3   1  100.91    6.97
  -1  -3   1  102.15    6.89
  -1  -3   1  100.13    6.79
  -1  -3   1   97.03    6.56
  -1  -3   1   94.60    6.70
  -1  -3   1   98.23    7.06
  -1  -3   1   97.77    6.96
  -1  -3   1  100.87    6.90
  -1  -3   1  100.12    6.79
  -1  -3   1  105.23    6.97
  -1  -3   1  101.57    6.96
  -1  -3   1   99.69    6.90
  -2  -3  -1   96.70    6.89
  -2   3   1  106.98    6.64
  -2   3   1  108.03    7.94
  -2   3   1   99.86    8.00
  -2  -3  -1   90.39    6.81
  -2  -3  -1  100.17    7.03
  -2   3   1  105.58    7.35
  -2   3   1  104.46    6.97
  -2   3   1   99.33    6.96
  -2  -3  -1  101.40    7.21
  -2  -3  -1   99.14    7.00
  -2  -3  -1  100.14    7.10
  -2  -3  -1  102.71    6.92
  -2   3   1  110.17    7.21
  -2  -3  -1   95.23    7.02
  -2  -3  -1  100.37    7.08
   2   3   1   96.32    6.93
   2   3   1   97.94    6.81
   2   3   1  102.49    6.70
   2   3   1  108.54    6.89
   2   3   1   97.14    7.03
   2   3   1   93.77    7.06
   2  -3  -1  104.55    7.35
   2   3   1   93.94    6.88
   2   3   1   94.86    6.98
   2  -3  -1  112.40    7.93
   2   3   1  103.35    7.07
  -3  -3  -1  141.74   11.06
  -3  -3  -1  147.42   10.54
  -3  -3  -1  139.08   10.38
  -3  -3  -1  157.11   10.44
  -3  -3  -1  141.76   10.65
  -3  -3  -1  142.61   10.83
  -3  -3  -1  150.26   10.69
  -3  -3  -1  146.17   10.03
   3  -3   1  169.46   11.09
  -3  -3  -1  154.46   10.47
   3  -3   1  172.38   11.95
  -3  -3  -1  142.82   10.57
  -3  -3  -1  144.34   10.27
  -3  -3  -1  148.35   10.59
  -3   3  -1  161.23   12.11
  -3   3  -1  164.85   10.46
   3   3   1  150.92   10.27
   3   3   1  146.56   10.44
  -3   3  -1  154.63   10.34
  -3   3  -1  161.68    9.94
  -3   3  -1  170.87   10.37
  -3   3  -1  171.63   10.70
  -3   3  -1  153.24   11.06
   3   3   1  141.32   10.39
   3   3   1  144.07   10.67
   3   3   1  142.36   10.55
  -3   3  -1  166.11   10.44
   3   3   1  142.58   10.64
   3   3   1  146.45   10.57
   3   3   1  160.53   10.39
  -4  -3  -1   84.37    6.38
  -4  -3  -1   83.60    6.21
  -4  -3  -1   87.94    5.89
  -4  -3  -1   88.94    6.20
  -4  -3  -1   83.85    6.16
  -4  -3  -1   89.43    6.26
  -4  -3  -1   84.82    6.03
  -4  -3  -1   82.59    6.51
  -4  -3  -1   88.68    6.07
  -4  -3  -1   87.88    6.14
  -4  -3  -1   85.17    6.01
   4   3   1   82.69    6.21
   4   3   1   85.10    6.25
   4   3   1   92.21    6.22
   4   3   1   85.07    6.07
   4   3   1   86.82    6.24
   4   3   1   94.46    6.06
   4   3   1   93.17    6.05
   4   3   1   86.31    6.17
   5  -3   1   58.04    4.30
   5  -3   1   64.21    4.36
   5   3  -1   55.27    4.36
   5   3  -1   57.17    4.44
   5  -3   1   63.59    4.19
   5  -3   1   63.28    4.21
   5  -3   1   62.99    4.25
   5   3  -1   59.17    4.32
   5   3  -1   59.08    4.45
  -5   3  -1   55.91    4.67
  -5  -3   1   64.17    4.30
  -5   3  -1   57.75    5.12
  -5   3  -1   58.00    4.33
  -5   3  -1   58.01    4.26
  -5  -3   1   63.93    4.49
  -5  -3   1   58.94    4.36
  -5   3  -1   60.16    4.40
  -5   3  -1   56.94    4.08
  -5  -3   1   60.11    4.71
  -5  -3   1   62.39    4.46
  -5   3  -1   61.14    4.26
  -5  -3   1   58.98    4.23
  -5   3  -1   67.50    4.42
  -5  -3   1   56.65    4.22
  -5  -3   1   60.39    4.51
  -5  -3   1   57.64    4.59
  -5  -3   1   64.40    4.43
  -5  -3   1   59.00    4.42
  -5   3  -1   58.90    4.30
  -5  -3   1   62.25    4.31
  -6  -3  -1   56.11    4.50
  -6  -3  -1   56.21    4.11
  -6  -3  -1   51.89    3.85
  -6  -3  -1   61.97    4.20
  -6  -3  -1   53.49    4.35
  -6  -3  -1   53.27    4.00
   6   3   1   52.05    4.18
   6   3   1   55.03    4.08
   6   3   1   54.65    4.13
   6   3   1   55.98    4.17
   7  -3   1   16.42    1.47
   7  -3   1   15.31    1.41
  -7   3  -1   15.96    1.48
  -7   3  -1   17.84    1.51
  -7   3  -1   14.93    1.44
  -7   3  -1   14.86    1.33
  -7   3  -1   16.35    1.88
   8  -3   1   12.76    1.31
   8  -3   1   12.32    1.37
  -8   3  -1   12.53    1.72
  -8   3  -1   13.88    1.41
  -8   3  -1   13.78    1.28
  -8   3  -1   13.03    1.37
  -8   3  -1   14.23    1.35
  -9   3   1   48.48    3.51
  -9   3   1   47.44    4.45
   9  -3  -1   45.30    3.71
   0  -4  -1  495.94   33.98
   0  -4  -1  463.90   33.48
   0   4   1  478.72   33.51
   0  -4  -1  465.50   32.64
   0   4   1  480.28   31.90
   0  -4  -1  506.04   33.99
   0   4   1  481.25   38.20
   0  -4  -1  533.20   34.26
   0   4   1  478.10   33.21
   0   4   1  480.17   33.50
   0  -4  -1  519.52   31.89
   0  -4  -1  495.95   33.93
   0   4   1  518.62   33.24
   0  -4  -1  509.44   33.94
   0  -4  -1  501.47   34.29
  -1  -4  -1  163.32   11.02
   1   4  -1  166.21   10.89
   1   4  -1  160.52   11.02
  -1  -4  -1  171.58   11.14
  -1  -4  -1  150.32   11.12
   1   4  -1  160.76   11.06
   1   4  -1  160.86   11.08
  -1  -4  -1  156.62   11.28
  -1  -4  -1  163.25   10.86
  -1  -4  -1  149.08   10.70
   1   4  -1  160.67   11.01
  -1  -4  -1  169.56   11.13
   1   4  -1  159.00   10.89
  -1  -4  -1  161.04   11.03
  -1  -4  -1  156.15   10.86
  -1  -4  -1  157.25   10.98
  -1  -4  -1  151.40   11.11
   1   4  -1  165.26   10.50
   1   4  -1  157.83   10.65
  -1  -4   1  151.21   10.69
  -1  -4   1  162.69   10.46
   1   4   1  155.59   11.02
  -1  -4   1  165.05   11.12
   1   4   1  159.39   10.49
   1   4   1  159.41   11.08
  -1  -4   1  166.51   11.11
   1   4   1  156.66   10.90
  -1  -4   1  157.11   11.26
  -1  -4   1  160.49   10.99
  -1  -4   1  175.43   11.12
  -1  -4   1  164.62   10.84
   1   4   1  153.55   10.89
   1   4   1  150.53   10.65
  -1  -4   1  168.50   10.85
  -1  -4   1  163.03   11.02
  -1  -4   1  163.73   11.12
  -1  -4   1  166.55   10.99
   1   4   1  156.19   11.01
   2   4  -1  119.70    7.73
   2   4  -1  120.77    8.02
   2   4  -1  113.18    7.91
   2   4  -1  114.07    8.04
   2   4  -1  115.06    8.00
   2   4  -1  117.73    8.11
   2   4  -1  125.49    8.15
   2   4  -1  119.92    8.13
   2   4  -1  114.29    8.13
  -2  -4   1  115.82    8.30
  -2  -4   1  112.21    7.94
  -2  -4   1  114.53    7.68
  -2  -4   1  116.98    8.10
  -2  -4   1  118.73    8.11
  -2  -4   1  121.79    7.97
  -2  -4   1  109.78    8.16
  -2  -4   1  112.46    8.16
   3   4  -1   70.27    4.98
  -3  -4  -1   88.46    5.49
  -3  -4  -1   89.56    5.23
  -3  -4  -1   89.22    5.08
   3   4  -1   67.70    5.08
   3   4  -1   66.73    5.14
   3   4  -1   66.75    4.94
   3   4  -1   64.58    5.14
   3   4  -1   65.65    5.06
   3   4  -1   66.70    5.13
   3   4  -1   65.11    4.89
  -3  -4   1   65.31    5.16
  -3  -4   1   69.22    5.13
  -3  -4   1   68.13    5.05
  -3  -4   1   67.11    5.28
  -3  -4   1   66.60    4.98
  -3  -4   1   65.55    5.35
  -3  -4   1   67.19    5.15
  -3  -4   1   64.52    5.00
   3   4   1   88.05    5.13
  -3  -4   1   64.87    5.11
   3   4   1   85.86    5.20
   3   4   1   85.71    5.04
  -5   4   1   73.46    4.84
  -5   4   1   67.63    5.67
  -5   4   1   72.71    4.73
  -5   4   1   71.08    5.24
  -5   4   1   75.60    4.79
   5  -4   1   63.13    4.80
  -5   4   1   71.29    4.72
  -5   4   1   68.67    4.77
  -5   4   1   71.34    4.55
   5  -4   1   59.45    4.75
  -5   4  -1   59.24    4.51
   5  -4  -1   72.67    4.77
  -5   4  -1   58.94    4.69
  -5   4  -1   64.16    4.84
   5  -4  -1   76.09    4.80
   5  -4  -1   80.56    4.66
  -5   4  -1   58.04    4.76
  -5   4  -1   57.66    4.70
  -5   4  -1   61.53    4.74
  -6   4   1   71.36    4.38
  -6   4   1   73.18    5.09
  -6   4   1   72.33    4.55
  -6   4   1   70.71    4.36
   6   4  -1   51.89    4.67
  -6   4   1   66.85    4.58
  -6   4   1   67.05    5.46
   6   4  -1   52.27    4.63
  -6  -4   1   57.97    4.57
   6  -4  -1   73.29    4.61
  -6  -4   1   54.11    4.61
   6  -4  -1   73.06    4.59
  -6  -4   1   53.85    4.97
  -6  -4   1   57.47    4.72
  -6  -4   1   52.95    4.66
  -7   4   1    9.77    1.02
  -7   4   1    9.80    1.03
  -7   4   1    9.73    0.95
   7   4  -1   11.43    1.18
   7   4  -1   11.09    1.21
  -7   4   1    9.59    1.03
   7   4  -1   11.33    1.19
  -7   4   1    9.42    1.32
  -7   4   1    9.42    0.99
   7   4  -1   11.47    1.14
  -7   4   1    8.94    1.01
  -7   4   1    9.17    0.99
   7  -4  -1    9.61    1.00
  -7  -4   1   10.99    1.05
  -7  -4   1   12.32    0.92
  -7  -4   1   11.44    1.34
  -7  -4   1   13.45    1.42
   7  -4  -1    9.47    1.04
   8  -4   1   17.56    1.57
   8  -4   1   14.75    1.41
   8   4   1   13.41    1.55
  -8   4  -1   15.08    1.90
  -8   4  -1   16.52    1.42
   8   4   1   11.78    1.45
   8   4   1   12.39    1.55
  -8   4  -1   16.63    1.38
  -8   4  -1   15.39    1.46
  -8   4  -1   15.53    1.49
  -1  -5  -1   97.85    6.77
  -1  -5  -1  102.50    6.71
  -1  -5  -1   98.84    6.52
  -1  -5  -1  101.47    6.76
  -1  -5  -1  103.17    6.89
  -1  -5   1   74.25    6.54
   1   5   1   99.51    6.64
  -1  -5   1   76.92    6.72
   1   5   1  102.38    7.65
   1   5   1  100.97    6.74
   1   5   1   99.13    6.63
   1   5   1  100.62    6.43
  -2  -5  -1   43.27    3.19
  -2  -5  -1   43.14    3.09
  -2  -5  -1   44.98    3.22
  -2  -5  -1   43.50    3.29
  -2  -5  -1   40.60    3.08
  -2  -5  -1   41.60    3.20
  -2  -5  -1   44.07    3.00
  -2  -5  -1   43.71    3.17
   2   5   1   42.33    2.99
   2   5   1   44.43    3.04
   2   5   1   45.31    3.17
   2   5   1   42.33    3.13
   2   5   1   46.41    3.09
   2   5   1   46.14    3.15
   2   5   1   46.40    3.24
   2   5   1   41.71    2.99
   2   5   1   42.49    3.19
   2   5   1   42.59    3.08
   2   5   1   40.82    3.13
   3   5  -1   73.62    5.12
   3   5  -1   80.27    5.32
   3   5  -1   68.42    5.20
   3   5  -1   71.84    5.24
   3   5  -1   78.91    5.11
   3   5  -1   74.50    5.36
   3   5  -1   75.06    5.30
  -3  -5   1   72.72    5.30
  -3  -5   1   75.07    5.55
  -3  -5   1   74.18    5.48
  -3  -5   1   71.24    5.35
  -3  -5   1   79.83    5.37
  -3  -5   1   72.44    5.18
  -3  -5   1   72.89    5.17
  -3  -5   1   77.03    5.05
  -3  -5   1   69.71    5.33
  -5   5   1   53.95    3.58
  -5   5   1   49.88    3.40
  -5   5   1   47.96    3.38
  -5   5   1   46.75    3.55
  -5   5   1   53.11    4.06
  -5   5   1   52.01    3.57
  -5   5   1   46.74    4.33
  -5   5   1   47.31    3.53
  -5   5   1   50.00    3.56
   5  -5  -1   50.58    3.55
   5  -5  -1   53.59    3.57
  -6  -5  -1   73.92    5.41
  -6  -5  -1   65.58    4.84
  -6  -5  -1   70.96    5.07
   6  -5   1   69.01    4.92
   6  -5   1   63.21    4.85
  -6  -5  -1   70.21    5.13
  -6  -5  -1   75.05    5.54
  -6  -5  -1   79.15    5.22
  -6   5  -1   68.09    4.86
  -6   5  -1   66.30    4.81
  -6   5  -1   63.70    4.59
  -6   5  -1   69.32    4.85
   6   5   1   65.29    5.00
  -6   5  -1   64.26    4.86
  -6   5  -1   61.51    5.84
  -6   5  -1   64.40    4.83
   6   5   1   69.89    4.95
  -6   5  -1   61.14    5.33
   6   5   1   70.17    5.15
   6   5   1   74.93    5.14
  -7   5   1   23.86    2.08
  -7   5   1   24.41    2.09
  -7   5   1   23.13    1.95
  -7  -5  -1   27.26    2.20
  -7   5   1   24.15    2.00
   7  -5   1   32.26    2.16
  -7  -5  -1   29.06    2.60
  -7   5   1   24.91    2.06
  -7   5   1   22.35    2.60
  -7   5   1   24.59    2.10
   7   5   1   29.21    2.40
   7  -5  -1   25.62    2.14
   7  -5  -1   22.82    2.06
   7   5   1   26.98    2.26
  -7   5  -1   30.92    2.82
   7   5   1   30.35    2.37
  -7   5  -1   32.01    2.20
   8   5   1   12.08    1.34
   8   5   1   11.59    1.41
   8   5   1   10.13    1.19
   0  -6  -1  166.73   12.38
   0   6   1  177.22   12.00
   0   6   1  176.05   12.14
   0   6   1  169.70   12.11
   0   6   1  172.51   13.86
   0   6   1  168.62   11.98
   0  -6  -1  192.42   11.93
   0  -6  -1  165.98   12.22
   0  -6  -1  185.96   12.24
   0  -6  -1  184.49   12.23
   0   6   1  173.54   11.55
   0  -6  -1  167.52   11.77
   0  -6  -1  180.94   11.95
   0  -6  -1  187.36   12.11
   0  -6  -1  181.84   12.24
  -1  -6  -1   77.67    5.33
  -1  -6  -1   72.54    5.19
  -1  -6  -1   78.56    5.24
  -1  -6  -1   77.26    5.38
  -1  -6  -1   72.08    5.47
  -1  -6  -1   71.35    5.38
   1   6   1   74.75    5.39
   1   6   1   80.45    5.15
   1   6   1   76.83    5.30
   1   6   1   76.10    6.10
   1   6   1   76.51    5.30
   1   6   1   76.37    5.37
   3   6  -1   83.75    5.91
   3   6  -1   76.73    5.56
   3   6  -1   84.25    5.80
   3   6  -1   79.59    5.69
   3   6  -1   81.15    5.61
   3   6  -1   84.48    5.58
   3   6  -1   77.36    5.77
   3   6  -1   86.26    5.91
   3   6  -1   82.76    5.80
  -3  -6   1   83.41    5.88
  -3  -6   1   79.81    5.69
  -3  -6   1   80.82    6.10
  -3  -6   1   78.82    5.89
  -3  -6   1   83.55    5.72
  -3  -6   1   83.23    6.03
  -3  -6   1   75.39    5.87
  -3  -6   1   80.00    5.84
  -3  -6   1   86.89    5.56
  -4   6   1   29.22    2.78
  -4   6   1   31.35    2.04
  -5   6   1   16.67    1.21
  -5   6   1   16.61    1.81
  -5   6   1   16.38    1.21
  -5   6   1   17.62    1.30
  -5   6   1   17.57    1.28
  -5   6   1   16.79    1.28
  -5   6   1   17.67    1.28
   6  -6   1   11.14    1.03
  -6  -6  -1   14.70    1.43
   6  -6   1   12.40    1.09
  -6  -6  -1   13.48    1.20
  -6  -6  -1   14.40    1.38
  -6  -6  -1   14.74    1.36
  -6  -6  -1   13.51    1.53
   6   6   1   14.33    1.32
  -6   6  -1   12.25    1.09
  -6   6  -1   10.87    1.04
  -6   6  -1   13.23    1.47
   6   6   1   13.97    1.25
   6   6   1   14.46    1.36
   6   6   1   13.11    1.20
  -6   6  -1   11.85    1.01
  -6   6  -1   11.95    1.00
  -6   6  -1   12.25    1.04
  -6   6  -1   12.34    1.07
  -6   6  -1   10.69    1.48
  -7   6   1   18.07    1.42
  -7   6   1   17.60    1.39
  -7   6   1   17.50    1.47
  -7   6   1   17.60    2.06
  -7   6   1   18.89    1.55
  -7   6   1   18.26    1.54
  -7   6   1   20.27    1.51
   7  -6  -1   17.40    1.50
   8   6   1   10.88    1.23
   8   6   1   11.99    1.43
  -2   7   1   56.46    3.95
  -2   7   1   55.63    3.94
  -2   7   1   57.77    3.77
  -2   7   1   57.60    4.58
  -4  -7  -1   23.74    2.12
  -4  -7  -1   21.99    1.86
  -4  -7  -1   21.44    1.95
  -4  -7  -1   21.82    1.96
  -4  -7  -1   21.54    2.07
  -4  -7  -1   23.14    1.95
  -4  -7  -1   23.98    2.03
   4   7   1   23.06    1.79
   4   7   1   21.44    1.68
   4   7   1   24.06    2.10
   4   7   1   24.16    1.89
   4   7   1   24.69    1.90
  -5   7   1   25.67    2.61
  -5   7   1   28.05    1.93
  -5   7   1   26.32    1.91
  -6   7   1   18.13    1.25
  -6   7   1   19.14    1.22
  -6   7   1   19.15    1.37
  -6  -7  -1   19.28    1.72
   6   7  -1   14.89    1.55
  -6  -7  -1   18.95    1.90
  -6   7   1   19.01    1.36
  -6  -7  -1   18.93    1.68
  -6   7   1   18.17    1.95
  -6   7   1   19.19    1.22
  -6  -7  -1   18.95    1.77
   6   7  -1   13.39    1.42
   6   7  -1   13.98    1.40
  -6  -7   1   14.89    1.74
  -6  -7   1   13.39    1.44
  -6  -7   1   15.21    1.62
  -6  -7   1   14.80    1.64
  -6  -7   1   13.88    1.59
  -6  -7   1   14.11    1.73
   6   7   1   19.05    1.54
  -6  -7   1   13.62    1.53
  -7   7   1    3.87    0.45
  -7   7   1    4.14    0.57
   7   7  -1    6.06    0.74
  -7   7   1    3.95    0.56
  -7   7   1    4.22    0.46
  -7   7   1    4.51    0.45
  -7   7   1    3.96    0.46
  -7   7   1    3.84    0.91
  -7  -7   1    6.97    1.11
  -8   7   1    1.81    0.44
  -8   7   1    1.70    0.35
  -8   7   1    2.23    0.79
  -8   7   1    2.23    0.48
   1   8  -1   31.20    2.30
   1   8  -1   31.05    2.35
   1   8  -1   33.00    2.70
   1   8  -1   30.30    2.35
   1   8  -1   30.27    2.41
   1   8  -1   32.67    2.42
  -1  -8   1   29.28    2.40
  -1  -8   1   31.34    2.35
  -1  -8   1   30.38    2.29
  -1  -8   1   30.84    2.33
  -1  -8   1   28.72    2.34
   2   8  -1   43.20    3.56
   2   8  -1   44.14    4.04
   2   8  -1   45.04    3.63
  -2  -8  -1   55.61    3.58
   2   8  -1   41.99    3.55
  -2  -8  -1   58.37    3.82
   2   8  -1   45.02    3.48
  -2  -8  -1   59.21    3.70
  -2  -8  -1   56.21    3.71
   2   8  -1   41.33    3.63
  -2  -8   1   44.63    3.48
  -2  -8   1   44.53    3.58
   2   8   1   59.78    3.81
   2   8   1   58.82    3.73
  -2  -8   1   41.10    3.59
  -2  -8   1   40.99    3.47
  -3  -8  -1   36.00    2.91
  -3  -8  -1   38.34    2.98
  -3  -8  -1   39.17    3.18
  -3  -8  -1   40.99    3.07
  -3   8   1   46.62    3.56
  -3  -8  -1   36.67    3.05
  -3  -8  -1   38.94    3.10
   3   8   1   43.41    3.22
   3   8   1   40.20    3.08
   3   8   1   39.27    3.46
  -3   8  -1   31.68    3.42
  -4  -8   1   12.97    1.30
  -4  -8   1   12.60    1.30
  -4  -8   1   14.02    1.37
  -4  -8   1   14.60    1.44
  -4  -8   1   13.16    1.42
  -4  -8   1   12.86    1.23
  -4  -8   1   13.27    1.33
  -5   8  -1   11.57    1.51
  -5   8  -1   12.72    0.93
  -6   8   1   29.99    2.17
  -6   8   1   29.54    2.17
  -6   8   1   28.74    2.95
  -7   8  -1   19.57    2.36
  -7   8  -1   21.07    1.68
  -7   8  -1   22.20    1.73
   3   9  -1   18.86    1.65
   3   9  -1   19.49    1.81
   3   9  -1   18.26    1.68
  -3   9   1   15.05    1.23
  -3   9   1   14.35    1.22
  -3  -9   1   18.81    1.69
  -3  -9   1   17.74    1.61
  -3  -9   1   16.98    1.54
  -3  -9   1   19.73    1.62
  -3  -9   1   16.78    1.57
  -4   9  -1   18.97    2.05
  -6   9  -1   19.35    1.56
  -6  -9   1   24.30    2.08
  -6  -9   1   25.96    2.22
  -6  -9   1   24.32    2.14
  -6   9  -1   19.90    2.35
  -6   9  -1   18.96    1.58
  -7   9   1    6.12    1.20
  -7   9   1    5.96    0.64
  -7   9   1    6.33    0.66
   0  10  -1   29.01    2.26
   0  10  -1   28.02    2.16
   0  10  -1   28.65    2.25
   0 -10   1   29.91    2.24
   0  10  -1   27.30    2.26
   0  10  -1   28.86    2.25
   0 -10   1   29.45    2.19
  -1 -10  -1   23.52    2.04
  -1 -10  -1   25.21    2.03
  -1 -10  -1   24.36    1.98
   1  10   1   27.05    2.45
   1  10   1   23.49    2.03
   1  10   1   23.47    2.08
   1  10   1   25.59    2.02
   2  10  -1   11.99    1.14
  -2 -10  -1    7.69    0.99
   2  10  -1   12.33    1.29
  -2 -10  -1    7.30    0.96
   2  10  -1   11.76    1.17
   2  10   1    6.89    1.01
  -2 -10   1   10.88    1.09
  -2 -10   1   11.60    1.07
  -2 -10   1   10.83    1.06
   2  10   1    8.27    1.08
   2  10   1    8.62    1.22
   3  10  -1   11.11    1.27
   3  10  -1   11.10    1.34
  -3 -10   1   10.04    1.16
  -3 -10   1    9.88    1.12
  -3 -10   1   10.81    1.18
  -6 -10   1   20.18    2.09
  -6 -10   1   20.04    1.99
   0  11   1    7.49    0.84
   0 -11  -1    7.91    0.82
   0  11   1    7.13    0.82
   0  11   1    7.73    0.86
   0  11   1    7.17    0.85
   0 -11  -1    6.51    0.82
   0  11   1    7.77    0.87
  -1 -11  -1   14.94    1.38
  -1 -11  -1   13.60    1.38
   1  11   1   13.91    1.43
   1  11   1   16.01    1.47
  -3 -11  -1   14.44    1.54
  -3 -11  -1   16.39    1.59
  -3 -11  -1   13.23    1.47
   3  11  -1   13.80    1.58
   3  11   1   14.56    1.79
  -3 -11   1   15.84    1.55
  -3 -11   1   15.27    1.54
  -3 -11   1   14.05    1.47
  -5 -11   1   18.19    1.90
  -5 -11   1   17.10    1.83
   0 -12   1    7.93    0.89
   0  12  -1    7.48    0.88
   0  12  -1    7.68    0.86
   0 -12   1    8.44    0.91
   0  12  -1    7.66    0.91
  -2  12   1    4.32    0.48
  -2  12   1    5.18    0.53
  -2  12   1    4.72    0.61
  -2  12   1    5.19    0.62
  -3 -12  -1    8.72    1.16
  -3 -12  -1    7.91    1.13
  -4  12   1   14.38    1.11
  -4  12   1   13.85    1.11
   0  13   1    8.74    1.10
   0 -13  -1    7.74    1.09
   0 -13  -1    8.29    1.07
   0 -13   1   11.30    1.17
   0 -13   1   11.56    1.14
   0  13  -1   11.93    1.20
   1  13  -1    5.51    0.90
  -1 -13   1    5.32    0.86
  -1 -13   1    4.95    0.80
  -2  13  -1    6.36    0.74
  -2  13  -1    5.39    0.71
   0   0   2   22.67    1.56
   0   0  -2   22.31    1.63
   0   0   2   22.22    1.63
   0   0   2   21.63    1.59
   0   0   2   21.77    1.59
   0   0  -2   23.53    1.61
   0   0  -2   22.06    1.60
   0   0  -2   22.95    1.59
   0   0   2   23.20    1.60
   0   0  -2   22.84    1.82
   0   0   2   22.45    1.56
   0   0   2   21.10    1.56
   0   0  -2   22.46    1.58
   0   0  -2   21.30    1.56
   0   0   2   23.00    1.61
   0   0   2   21.69    1.51
   0   0   2   22.98    1.61
   0   0   2   23.05    1.82
   0   0   2   23.17    1.58
   0   0  -2   22.91    1.57
  -3   0   2  293.78   20.35
  -3   0   2  276.05   20.34
   3   0   2  335.31   21.16
   3   0  -2  265.01   20.35
  -3   0  -2  323.79   19.99
  -3   0   2  272.42   19.93
   3   0  -2  290.41   20.36
   3   0   2  319.01   19.96
  -3   0  -2  330.17   20.19
  -3   0   2  271.26   22.97
   3   0  -2  278.90   20.11
  -3   0   2  289.97   20.22
   3   0   2  328.00   19.91
   3   0   2  330.81   20.22
  -3   0  -2  334.59   19.96
  -3   0   2  287.62   20.14
  -3   0  -2  315.08   20.15
   3   0   2  322.93   20.16
   3   0  -2  276.26   20.18
  -3   0   2  256.65   19.15
   3   0  -2  293.48   20.36
   3   0   2  310.52   20.39
   3   0  -2  277.04   19.58
  -3   0  -2  316.21   20.20
  -3   0  -2  331.28   20.39
  -3   0  -2  323.21   19.19
  -3   0   2  262.35   20.57
   3   0  -2  265.22   19.13
   3   0   2  324.45   20.43
  -3   0   2  268.01   19.56
   3   0  -2  278.80   20.58
  -3   0   2  282.68   19.94
   3   0  -2  279.76   21.09
   3   0  -2  266.47   19.87
   3   0  -2  268.23   20.09
  -3   0  -2  306.14   21.16
  -3   0   2  274.79   20.13
   3   0   2  335.18   20.39
  -3   0  -2  323.00   20.37
   3   0  -2  268.52   20.36
  -3   0   2  261.74   21.08
  -5   0   2  256.96   20.08
  -5   0   2  257.67   17.60
  -5   0   2  276.23   17.64
  -5   0   2  256.65   16.76
   5   0  -2  251.40   17.53
   5   0  -2  268.68   17.13
  -5   0   2  244.16   18.47
   5   0  -2  262.69   17.37
  -5   0   2  238.59   17.97
  -5   0   2  253.19   17.41
   5   0  -2  247.07   17.76
   5   0  -2  253.14   17.78
  -5   0   2  256.82   17.62
   5   0  -2  251.53   17.59
  -5   0   2  261.26   17.43
  -7   0   2    8.13    1.17
  -7   0  -2   10.44    1.38
  -7   0   2    9.04    1.07
  -7   0   2    8.21    0.99
  -7   0   2    8.14    1.06
   7   0  -2    8.48    1.00
   7   0  -2    9.09    1.03
  -7   0   2    9.05    1.10
   7   0   2    9.67    1.03
  -7   0  -2   11.96    1.08
  -7   0  -2   11.27    1.20
   7   0  -2    8.90    1.00
  -7   0   2    8.32    1.21
   7   0   2   11.55    1.08
   7   0   2   11.57    1.17
  -7   0  -2   11.75    1.21
   9   0  -2   12.37    1.38
   9   0  -2   12.27    1.38
   0  -1   2   26.96    1.82
   0   1  -2   26.62    2.09
   0   1  -2   27.81    1.88
   0  -1   2   27.07    1.84
   0   1  -2   26.17    1.86
   0  -1   2   26.49    1.80
   0  -1   2   27.11    1.81
   0  -1   2   24.34    1.87
   0   1  -2   25.39    1.81
   0  -1   2   27.06    1.81
   0   1  -2   23.99    1.81
   0   1  -2   26.38    1.85
   0   1  -2   25.86    1.84
   0  -1   2   26.02    1.86
   0   1  -2   26.04    1.84
   0   1  -2   25.28    1.83
   0  -1   2   25.01    1.84
   0   1  -2   25.64    1.83
   0  -1   2   25.35    1.85
   0  -1   2   26.91    1.81
   0  -1   2   24.75    2.08
   0  -1   2   25.94    1.74
   0   1  -2   26.31    1.83
   0  -1   2   26.49    1.83
   0   1  -2   26.73    1.75
   0  -1   2   25.87    1.83
   0   1  -2   26.94    1.88
   0   1  -2   26.80    2.10
   0  -1   2   26.90    1.83
   0   1  -2   26.21    1.84
  -1   1   2  153.53   12.59
  -1   1   2  161.87   11.31
  -1   1   2  159.99   11.06
  -1   1   2  160.23   10.97
  -1   1   2  161.01   12.59
  -1   1   2  164.85   11.06
  -1   1   2  162.34   10.53
  -1   1   2  159.18   10.97
   1  -1  -2  169.14   12.57
   1  -1  -2  169.48   11.26
   1  -1  -2  161.06   11.04
   1  -1  -2  173.92   11.28
   1  -1  -2  153.89   12.57
   1  -1  -2  162.32   11.28
   1  -1  -2  156.29   11.55
   1  -1  -2  167.02   11.31
   1  -1  -2  163.44   11.29
   1  -1  -2  160.33   10.52
   1  -1  -2  154.84   11.04
   1  -1  -2  162.62   10.82
  -2  -1  -2  396.69   27.70
  -2  -1  -2  408.90   27.99
  -2  -1  -2  414.73   26.64
  -2  -1  -2  384.18   29.30
  -2  -1  -2  422.43   27.71
  -2  -1  -2  404.35   28.10
  -2  -1  -2  396.41   27.73
  -2  -1  -2  434.58   28.35
  -2  -1  -2  412.91   28.36
  -2  -1  -2  399.14   27.26
  -2  -1  -2  423.80   28.62
  -2  -1  -2  409.96   28.34
   2   1   2  420.00   27.27
   2   1   2  384.08   28.34
   2   1   2  449.14   28.33
   2   1   2  442.27   28.36
   2   1   2  394.98   27.97
   2   1   2  409.80   27.73
   2   1   2  440.15   27.70
   2   1   2  382.93   28.33
   2   1   2  407.13   26.64
   2   1   2  421.10   27.73
   2   1   2  415.09   28.10
  -3  -1  -2  246.24   16.33
  -3  -1  -2  236.78   16.79
  -3  -1  -2  236.72   16.80
  -3  -1  -2  242.58   16.63
  -3  -1  -2  266.89   17.18
  -3  -1  -2  257.78   16.99
  -3  -1  -2  242.28   16.54
  -3  -1  -2  247.71   15.96
  -3  -1  -2  235.41   16.94
  -3  -1  -2  250.72   16.60
   3   1   2  244.47   16.35
   3   1   2  236.31   16.60
   3   1   2  234.98   16.96
   3   1   2  262.96   16.57
   3   1   2  237.66   16.81
   3   1   2  249.41   16.79
   3   1   2  235.03   16.99
   3   1   2  250.95   15.98
  -4   1   2  277.50   22.03
  -4   1   2  271.58   19.06
  -4   1   2  272.92   19.26
  -4   1   2  277.83   19.08
   4  -1  -2  277.46   19.28
   4  -1  -2  286.71   18.74
   4  -1  -2  301.81   19.49
   4  -1  -2  290.76   19.50
   4  -1  -2  280.28   19.02
   4  -1  -2  282.24   20.26
  -5  -1  -2   56.02    4.02
  -5  -1  -2   56.58    4.02
  -5  -1  -2   55.97    4.14
  -5  -1  -2   54.98    4.19
  -5  -1  -2   59.49    4.17
  -5  -1  -2   60.73    4.19
  -5  -1  -2   58.32    4.30
  -5  -1  -2   57.42    4.24
   5   1   2   57.28    4.17
   5   1   2   57.80    4.29
   5   1   2   60.99    4.18
   5   1   2   55.61    4.18
  -6   1   2    7.65    0.85
   6  -1   2    6.07    0.73
  -6  -1  -2    8.94    1.13
  -6  -1  -2    9.24    0.87
  -6  -1  -2    8.66    1.06
  -6   1   2    7.08    0.79
   6  -1   2    5.56    0.75
  -6   1   2    6.49    0.81
  -6   1   2    7.26    0.94
  -6   1   2    6.57    0.76
   6  -1   2    5.71    0.73
  -6   1   2    6.27    0.93
  -6  -1  -2    9.18    0.93
  -6   1   2    6.59    0.81
  -6  -1  -2    8.93    0.98
  -6  -1  -2    8.20    0.94
  -6   1   2    7.15    0.80
   6   1   2    8.55    0.93
  -6   1  -2    5.41    0.70
  -6   1  -2    5.67    0.99
  -6   1  -2    6.32    0.82
  -6   1  -2    5.80    0.81
   6   1   2    7.56    0.81
  -6   1  -2    6.57    0.76
   6   1   2    8.38    0.84
   6  -1  -2    6.50    0.76
   6  -1  -2    6.42    0.75
  -6   1  -2    5.71    0.76
  -6   1  -2    5.96    0.91
  -6   1  -2    6.58    0.80
   6  -1  -2    7.23    0.75
   6   1   2    8.38    0.86
   7   1  -2   10.87    1.15
   7   1  -2   12.13    1.18
   7   1  -2   10.78    1.17
   7   1  -2   10.77    1.15
  -7  -1   2   10.91    1.14
  -7  -1   2   12.26    1.39
  -7  -1   2   11.47    1.36
  -7  -1   2   11.66    1.26
  -7  -1   2   11.51    1.28
   8   1  -2   33.96    2.87
   8   1  -2   34.05    2.92
   8   1  -2   35.43    2.92
  -8  -1   2   34.52    3.02
  -8  -1   2   38.00    3.38
   9  -1   2   42.52    3.33
   9   1  -2   39.33    3.32
   9   1  -2   36.81    3.23
  -9   1  -2   40.29    3.99
  -1   2   2  199.23   14.34
  -1   2   2  209.12   14.03
  -1   2   2  205.02   15.94
  -1   2   2  201.63   14.01
  -1   2   2  207.02   14.09
  -1   2   2  199.65   13.33
  -1   2   2  199.24   14.05
   1  -2  -2  195.84   13.34
   1  -2  -2  210.34   14.31
   1  -2  -2  205.84   14.01
   1  -2  -2  218.91   14.05
   1  -2  -2  206.94   15.93
   1  -2  -2  208.40   14.65
  -2  -2  -2  170.12   11.67
  -2  -2  -2  168.98   12.40
  -2  -2  -2  167.39   11.24
  -2  -2  -2  168.27   11.66
  -2  -2  -2  168.59   11.95
  -2  -2  -2  177.61   11.52
  -2  -2  -2  175.13   11.72
  -2  -2  -2  168.67   11.85
  -2  -2  -2  175.51   11.69
  -2  -2  -2  170.22   11.81
  -2  -2  -2  186.00   12.11
   2   2   2  175.64   11.71
   2   2   2  189.19   11.68
   2   2   2  166.57   11.68
   2   2   2  171.65   11.97
   2   2   2  185.18   11.84
  -2   2  -2  137.38   11.73
   2   2   2  175.33   11.85
   2   2   2  178.03   11.27
   2   2   2  169.03   11.83
   2   2   2  176.55   11.52
  -3  -2  -2  370.78   26.15
   3   2  -2  372.53   26.47
  -3  -2  -2  378.27   25.89
  -3   2   2  423.03   25.89
  -3   2   2  405.21   25.86
  -3  -2  -2  344.93   24.88
  -3   2   2  406.30   24.87
   3   2  -2  406.03   25.47
  -3  -2  -2  364.29   26.49
  -3  -2  -2  343.23   27.40
  -3  -2  -2  367.94   26.26
   3   2  -2  379.01   26.15
  -3   2   2  423.74   29.90
  -3  -2  -2  358.67   25.92
   3   2  -2  391.56   24.91
   3   2  -2  378.18   25.87
   3   2  -2  377.83   25.90
  -3  -2  -2  363.22   25.89
  -3  -2  -2  364.75   25.48
  -3  -2  -2  341.86   25.84
  -3   2   2  401.96   26.11
   3   2  -2  365.90   26.14
   3   2  -2  395.42   27.36
  -3   2   2  383.86   27.39
  -3  -2  -2  350.15   26.47
   3   2  -2  378.38   26.24
   3   2  -2  363.00   26.47
  -3   2   2  418.28   26.72
   3   2  -2  397.97   25.86
  -3   2   2  410.23   26.11
  -3   2   2  400.75   24.86
   3   2   2  342.39   26.49
  -3  -2   2  390.26   26.25
  -3  -2   2  388.65   26.49
   3  -2  -2  426.55   26.48
  -3  -2   2  370.98   26.17
  -3  -2   2  374.74   26.77
   3   2   2  367.42   26.15
   3   2   2  359.08   26.17
  -3  -2   2  392.85   25.92
   3  -2  -2  441.00   26.45
   3  -2  -2  429.35   25.43
   3   2   2  370.25   25.92
   3   2   2  343.13   26.46
   3  -2  -2  424.46   27.43
   3  -2  -2  435.08   26.69
  -3  -2   2  402.53   25.93
  -3  -2   2  389.87   24.92
  -3  -2   2  381.23   25.86
   3   2   2  358.09   26.25
   3   2   2  390.09   25.87
   3   2   2  385.04   25.50
  -3  -2   2  379.66   26.48
  -3  -2   2  394.31   26.17
  -3  -2   2  345.26   25.83
   3  -2  -2  425.50   26.49
  -3  -2   2  374.87   27.38
  -3  -2   2  366.70   25.46
  -4  -2  -2  103.13    7.44
  -4  -2  -2   95.60    7.40
  -4  -2  -2   97.48    7.64
  -4  -2  -2  103.68    7.68
  -4   2   2  105.83    7.42
  -4  -2  -2   95.44    7.81
   4  -2   2  130.05    7.61
  -4  -2  -2   98.06    7.57
  -4  -2  -2   99.39    7.23
  -4   2   2  112.61    7.45
  -4   2   2  101.14    7.98
  -4   2   2  105.60    7.52
  -4   2   2  105.50    7.17
  -4  -2  -2  100.14    7.64
  -4   2   2  109.98    8.68
  -4  -2  -2   99.61    7.53
  -4   2   2  102.20    7.67
  -4  -2  -2   99.42    7.38
  -4   2   2  109.60    7.53
  -4   2  -2  131.44    7.21
   4  -2  -2  114.88    7.49
   4  -2  -2  105.45    7.56
  -4   2  -2  131.19    8.85
  -4   2  -2  126.94    8.08
   4  -2  -2  109.50    7.57
   4   2   2  100.51    7.59
   4  -2  -2  117.50    7.37
   4   2   2  110.38    7.45
   4   2   2  100.34    7.62
   4  -2  -2  122.74    7.60
   4  -2  -2  114.26    7.58
   4   2   2   97.06    7.65
   4  -2  -2  111.43    8.02
  -4   2  -2  128.81    7.60
   4   2   2  102.84    7.72
   4  -2  -2  114.02    7.31
   4   2   2   99.44    7.49
   5  -2   2   11.17    1.03
  -5   2   2   13.64    1.28
  -5   2   2   15.80    1.15
   5  -2   2   11.26    1.07
  -5   2   2   14.72    1.37
  -5   2   2   14.45    1.12
  -5   2   2   15.41    1.09
  -5   2   2   15.57    1.11
   5  -2   2   11.67    1.03
   5  -2   2   10.18    1.07
  -5   2  -2   10.27    1.06
  -5   2  -2   10.81    1.01
  -5   2  -2   10.06    1.07
   5  -2  -2   14.57    1.07
  -5   2  -2   10.33    1.03
  -5   2  -2   10.64    1.24
   5  -2  -2   15.54    1.05
  -5   2  -2   10.12    1.09
  -5   2  -2   12.19    1.14
  -5   2  -2   11.25    1.07
  -5   2  -2   10.10    1.33
   6  -2   2    4.08    0.58
   6  -2   2    4.28    0.55
   6  -2   2    3.89    0.54
  -6   2  -2    4.03    0.60
  -6   2  -2    4.29    0.57
  -6   2  -2    4.37    0.81
  -6   2  -2    4.36    0.61
  -6   2  -2    3.62    0.55
  -6   2  -2    4.39    0.58
  -6   2  -2    4.00    0.52
  -6   2  -2    3.81    0.70
   7  -2   2   28.40    2.27
   7  -2   2   27.23    2.19
  -7   2   2   26.04    2.08
  -7   2   2   23.95    2.18
  -7   2   2   24.39    2.19
  -7   2   2   25.51    2.12
  -7   2   2   27.43    2.21
  -7   2   2   25.01    2.58
  -7   2   2   24.84    2.46
  -7   2  -2   29.28    2.78
  -7   2  -2   29.18    2.30
  -7   2  -2   28.52    2.30
   7  -2  -2   23.96    2.14
  -7   2  -2   29.74    2.27
   7  -2  -2   24.43    2.17
   7  -2  -2   26.72    2.15
  -7   2  -2   27.69    2.09
  -8  -2  -2   20.65    2.29
  -8  -2  -2   19.26    2.02
   8   2   2   19.44    1.87
   8   2   2   19.77    1.94
   8   2   2   19.59    1.87
   9   2  -2   12.15    1.45
  -9   2   2   14.72    1.39
  -9   2   2   13.42    1.71
   9   2  -2   11.45    1.42
  -9   2   2   12.90    1.46
   9  -2  -2   14.03    1.43
   1  -3   2  198.46   15.16
   1  -3   2  232.27   15.50
  -1   3  -2  215.33   14.84
  -1   3  -2  222.65   16.94
  -1   3  -2  226.87   15.50
  -1   3  -2  211.73   14.83
  -1   3  -2  211.95   14.14
   2   3  -2  101.09    7.07
   2   3  -2  103.42    7.13
   2   3  -2   97.65    7.20
   2   3  -2  103.17    6.87
   2   3  -2  107.21    7.07
   2   3  -2  102.66    7.26
   2   3  -2  104.71    6.99
   2   3  -2  109.79    7.40
   2   3  -2  103.63    7.19
   2   3  -2  105.52    7.27
  -2  -3   2   99.91    7.20
  -2  -3   2  102.47    7.39
  -2  -3   2  106.87    7.22
  -2  -3   2   99.51    7.27
  -2  -3   2  102.15    7.27
  -2  -3   2  105.25    7.09
  -2  -3   2  106.30    7.22
  -2  -3   2  109.64    7.10
  -2  -3   2  105.40    7.52
  -2  -3   2  102.55    7.01
  -3   3   2  270.62   18.04
  -3   3   2  256.67   18.17
  -3   3   2  256.42   19.13
  -3   3   2  273.67   18.59
  -3   3   2  258.20   17.31
  -3   3   2  256.52   18.01
  -3   3   2  254.69   20.84
  -3   3   2  269.56   17.31
  -3   3   2  257.24   18.16
   3  -3  -2  286.98   17.87
   3  -3  -2  292.74   18.58
   3  -3  -2  270.67   19.16
   4   3  -2   80.43    6.12
  -4  -3  -2   84.54    6.17
  -4  -3  -2   87.55    5.99
  -4  -3  -2   95.66    6.05
   4   3  -2   83.30    5.97
  -4  -3  -2   83.72    6.48
  -4  -3  -2   93.62    6.23
  -4  -3  -2   90.29    6.16
   4   3  -2   76.61    5.97
   4   3  -2   78.50    6.14
   4   3  -2   83.53    5.84
  -4  -3  -2   89.73    6.00
  -4  -3  -2   89.88    6.15
   4   3  -2   87.80    6.15
   4   3  -2   80.51    6.14
  -4  -3  -2   92.64    6.13
   4   3  -2   86.36    5.95
   4   3  -2   78.08    6.07
  -4  -3  -2   91.74    5.86
  -4  -3  -2   85.86    6.35
  -4  -3  -2   90.28    6.22
  -4  -3   2   85.27    6.00
   4   3   2   98.67    6.03
  -4  -3   2   83.88    6.17
   4   3   2   89.57    6.04
   4   3   2   97.08    6.19
   4   3   2   86.75    6.21
  -4  -3   2   82.22    6.16
  -4  -3   2   78.64    5.92
  -4  -3   2   87.98    6.18
  -4  -3   2   82.36    6.41
   4   3   2   86.98    6.17
  -4  -3   2   80.01    6.29
   4   3   2   92.34    6.21
  -4  -3   2   87.95    6.16
  -4  -3   2   86.45    6.06
  -4  -3   2   73.03    5.92
  -4  -3   2   88.81    6.06
  -4  -3   2   84.17    5.84
   4   3   2   92.63    5.91
  -4  -3   2   80.43    6.08
   4   3   2   88.28    6.12
   6  -3   2    6.98    0.78
   6  -3   2    7.15    0.75
  -6   3  -2    8.91    0.82
  -6   3  -2    6.54    0.71
  -6   3  -2    7.85    0.82
  -6   3  -2    6.16    0.95
  -6   3  -2    7.28    0.80
  -6   3  -2    7.55    0.83
  -6   3  -2    7.36    0.80
  -6   3  -2    7.07    1.09
  -7   3   2   21.22    1.73
  -7   3   2   21.16    1.79
  -7   3   2   19.29    2.13
  -7  -3  -2   20.28    2.06
   7   3  -2   26.44    1.94
  -7   3   2   19.63    1.76
  -7   3   2   18.79    1.77
  -7   3   2   19.50    1.76
  -7   3   2   19.25    1.66
  -7  -3  -2   22.78    2.32
   7   3  -2   24.28    1.96
   7   3   2   20.77    1.90
   7  -3  -2   19.99    1.76
   7  -3  -2   20.61    1.76
   7   3   2   20.13    1.85
   7   3   2   21.81    1.97
   7   3   2   20.95    1.88
   8   3  -2   15.95    1.53
   8   3  -2   16.24    1.52
   8  -3   2   14.04    1.51
   8  -3   2   12.60    1.39
   8   3  -2   16.75    1.58
   8   3  -2   16.06    1.56
  -8   3  -2   13.31    1.47
  -8   3  -2   13.58    1.83
  -8  -3   2   16.58    1.73
  -8   3  -2   14.07    1.36
  -8   3  -2   13.15    1.46
  -8   3  -2   14.20    1.45
  -9   3   2   21.71    2.44
  -9   3   2   23.42    1.92
   9  -3  -2   20.85    1.99
  -1  -4  -2  273.01   17.46
  -1  -4  -2  266.23   17.06
  -1  -4  -2  252.21   17.44
  -1  -4  -2  258.25   17.30
  -1  -4  -2  245.76   17.24
  -1  -4  -2  282.25   17.47
  -1  -4  -2  262.63   17.05
  -1  -4  -2  242.22   17.45
  -1  -4  -2  233.69   16.77
   1   4   2  247.35   16.42
   1   4   2  248.25   17.25
   1   4   2  255.34   17.25
   1   4   2  249.86   16.74
   1   4   2  244.47   17.40
   1   4   2  238.53   19.64
   1   4   2  252.86   17.08
   1   4   2  252.28   17.07
   1   4   2  241.26   17.28
   2  -4   2  171.02   11.93
   2  -4   2  171.61   12.87
  -2   4  -2  163.09   11.92
  -2   4  -2  168.84   11.36
  -2   4  -2  157.41   10.80
  -2   4  -2  164.12   11.35
  -2   4  -2  163.37   13.06
  -3  -4  -2  270.42   18.58
  -3  -4  -2  255.25   18.35
  -3  -4  -2  281.90   18.66
  -3  -4  -2  269.54   18.86
  -3  -4  -2  259.22   19.51
  -3  -4  -2  261.40   18.12
  -3  -4  -2  271.92   18.68
  -3  -4  -2  265.91   18.82
  -3  -4  -2  273.31   19.09
   3   4   2  275.06   18.45
   3   4   2  257.92   18.60
   3   4   2  272.49   18.66
   3   4   2  288.99   18.64
   3   4   2  285.90   18.46
   3   4   2  283.10   17.77
   3   4   2  282.56   18.12
   3   4   2  254.10   18.34
   3   4   2  262.19   18.80
   3   4   2  287.88   18.34
   3   4   2  267.32   18.79
  -4  -4  -2   90.37    5.77
   4   4  -2   68.24    5.53
  -4  -4  -2   82.20    5.63
  -4  -4  -2   81.52    5.67
  -4  -4  -2   84.83    5.86
  -4  -4  -2   80.99    5.48
  -4  -4  -2   83.16    5.35
  -4  -4  -2   90.30    5.67
   4   4  -2   76.93    5.45
   4   4  -2   76.22    5.62
   4   4  -2   71.13    5.60
   4   4  -2   65.07    5.57
  -4  -4  -2   87.59    5.53
   4   4  -2   73.14    5.35
  -4  -4  -2   91.66    5.57
  -4  -4  -2   83.71    5.71
   4   4  -2   66.72    5.42
  -4  -4  -2   85.33    6.00
   4   4  -2   72.73    5.62
  -4  -4   2   69.51    5.61
  -4  -4   2   74.91    5.34
   4   4   2   86.19    5.67
   4   4   2   82.39    5.68
  -4  -4   2   73.07    5.58
   4   4   2   81.80    5.58
  -4  -4   2   76.32    5.62
  -4  -4   2   70.07    5.44
   4   4   2   81.53    5.50
  -4  -4   2   74.01    5.48
   4   4   2   88.88    5.69
  -4  -4   2   78.09    5.66
   4   4   2   88.34    5.73
  -4  -4   2   71.09    5.84
  -4  -4   2   69.50    5.75
  -4  -4   2   67.53    5.40
  -4  -4   2   74.72    5.65
  -5   4   2   55.81    5.14
  -5   4   2   60.90    4.70
  -5   4   2   60.98    4.81
  -5   4   2   60.00    4.52
   5   4  -2   76.19    4.83
  -5   4   2   59.35    4.74
   5   4  -2   76.13    5.00
  -5   4   2   56.48    4.51
   5   4  -2   77.35    4.93
  -5  -4   2   79.69    4.96
  -5  -4   2   79.87    5.21
  -5  -4   2   73.36    4.77
   5  -4  -2   61.91    4.76
   5  -4  -2   60.33    4.59
  -5  -4   2   79.96    5.29
   6   4  -2   10.96    1.18
   6   4  -2   11.28    1.11
   6   4  -2   11.58    1.17
   6   4  -2   11.43    1.16
  -6  -4   2   11.66    1.14
  -6  -4   2   13.27    1.35
  -6  -4   2   11.23    1.29
  -6  -4   2   12.83    1.24
  -6  -4   2   12.33    1.34
  -6  -4   2   12.45    1.19
  -6  -4   2   11.23    1.16
  -6  -4   2   10.99    1.01
  -7  -4  -2   22.99    1.74
  -7  -4  -2   25.28    1.95
  -7  -4  -2   24.39    2.34
   7   4   2   23.52    2.15
   7   4   2   20.34    2.01
   7   4   2   24.89    2.07
   7   4   2   23.40    2.10
   8   4  -2    9.97    1.21
   8   4  -2   10.14    1.20
   8   4  -2   10.56    1.26
  -8  -4   2   10.36    1.38
   2   5  -2  152.71   10.91
   2   5  -2  160.86   11.03
   2   5  -2  161.08   11.16
   2   5  -2  159.65   10.91
   2   5  -2  166.34   10.77
   2   5  -2  155.75   11.18
   2   5  -2  154.61   11.16
   2   5  -2  153.10   11.02
   2   5  -2  152.55   11.05
   2   5  -2  167.18   10.64
   2   5  -2  157.44   11.05
   2   5  -2  166.70   11.20
  -2  -5   2  150.00   11.24
  -2   5  -2  177.82   11.10
  -2  -5   2  147.36   10.82
  -2   5  -2  188.58   11.13
  -2   5  -2  182.56   10.59
  -2  -5   2  157.01   11.13
  -2   5  -2  181.77   12.80
  -2  -5   2  153.94   11.14
  -2  -5   2  160.24   10.97
  -2  -5   2  149.78   11.39
  -2  -5   2  164.20   10.60
  -2  -5   2  153.61   11.25
   3   5  -2   96.68    7.09
  -3   5   2  107.27    8.23
   3   5  -2  101.11    7.12
  -3   5   2  110.57    6.68
  -3   5   2  102.27    7.00
   3   5  -2  100.86    6.87
  -3   5   2  104.58    7.00
   3   5  -2  102.00    7.19
   3   5  -2  104.88    7.20
   3   5  -2  102.35    7.22
   3   5  -2   99.07    6.98
  -3  -5   2  106.63    7.51
  -3  -5   2   95.31    6.98
  -3  -5   2  100.90    7.04
  -3  -5   2   95.25    7.24
  -3  -5   2   96.17    7.37
  -3  -5   2  105.95    6.85
   3  -5  -2  113.57    7.59
  -3  -5   2   98.42    7.17
  -3  -5   2  103.10    7.21
  -3  -5   2   94.55    7.23
   4   5  -2   64.01    4.24
   4   5  -2   58.07    4.23
   4   5  -2   60.33    4.37
   4   5  -2   60.16    4.39
   4   5  -2   61.10    4.40
   4   5  -2   63.06    4.48
   4   5  -2   60.70    4.34
   4   5  -2   58.50    4.44
  -4  -5   2   61.60    4.48
  -4  -5   2   59.48    4.29
  -4  -5   2   56.81    4.55
  -4  -5   2   59.37    4.46
  -4  -5   2   56.79    4.27
  -4  -5   2   59.85    4.44
  -4  -5   2   59.26    4.40
  -4  -5   2   60.89    4.61
  -5   5   2   29.29    2.34
  -5   5   2   31.79    2.24
  -5   5   2   30.86    2.32
  -5   5   2   31.44    2.25
  -5   5   2   32.69    2.37
  -5   5   2   34.29    2.79
  -5   5   2   33.38    2.35
  -5   5   2   31.19    2.94
  -5   5   2   34.19    2.34
  -5   5   2   34.34    2.34
   5  -5  -2   31.00    2.32
   5  -5  -2   33.06    2.33
   8   5  -2   18.88    1.84
   8   5  -2   18.05    1.84
   8   5  -2   17.71    1.77
   2   6  -2   72.01    4.82
   2   6  -2   69.82    4.77
   2   6  -2   74.22    4.77
   2   6  -2   67.08    4.88
   2   6  -2   70.06    4.60
   2   6  -2   63.26    4.78
   2   6  -2   71.68    4.67
   2   6  -2   70.53    4.90
  -2  -6   2   66.06    4.71
  -2  -6   2   63.05    4.86
  -2  -6   2   65.17    4.82
  -2  -6   2   65.27    4.97
  -2  -6   2   69.98    4.85
  -2  -6   2   64.15    4.70
  -2  -6   2   63.58    4.86
   3   6  -2  162.48   10.28
   3   6  -2  156.47   10.60
   3   6  -2  155.03   10.63
   3   6  -2  158.85   10.60
   3   6  -2  143.69   10.27
   3   6  -2  154.40   10.50
   3   6  -2  144.14   10.44
   3   6  -2  152.17   10.48
   3   6  -2  155.41   10.12
   3   6  -2  153.13   10.63
  -3  -6   2  150.80   10.59
  -3  -6   2  151.07   10.40
  -3  -6   2  151.45   10.86
  -3  -6   2  140.23   10.66
  -3  -6   2  147.36   10.58
  -3  -6   2  143.01   10.29
  -3  -6   2  146.81   10.69
  -3  -6   2  159.85   10.07
  -3  -6   2  156.48   11.04
  -4   6   2   34.64    2.56
  -4  -6  -2   41.63    2.92
  -4   6   2   35.15    3.38
  -4  -6  -2   41.64    3.25
  -4   6   2   35.59    2.55
  -4  -6  -2   36.55    3.12
  -4  -6  -2   39.25    3.00
  -4  -6  -2   41.73    3.08
  -4  -6  -2   41.68    2.98
  -4   6   2   35.04    2.68
  -4   6   2   36.35    2.68
  -4   6   2   34.15    2.65
  -4  -6  -2   38.64    3.02
   4   6   2   42.22    2.95
   4   6   2   42.18    2.90
   4   6   2   38.19    2.78
   4   6   2   42.86    3.16
   4   6   2   39.93    2.96
   5  -6   2   22.57    1.66
   5  -6   2   22.30    1.61
  -5   6  -2   22.75    2.06
  -5   6  -2   22.38    1.66
  -5   6  -2   21.03    1.62
  -5   6  -2   22.90    1.64
  -5   6  -2   20.72    2.22
  -5   6  -2   21.58    1.55
  -5   6  -2   21.87    1.65
   6   6  -2    1.69    0.46
  -6   6   2    0.50    0.22
  -6  -6  -2    0.07    0.23
  -6  -6  -2    1.22    0.51
   6   6  -2    1.58    0.38
  -6   6   2    0.64    0.21
   6   6  -2    1.95    0.49
  -6   6   2    0.55    0.24
  -6   6   2    0.33    0.22
  -6  -6  -2    0.14    0.30
   6   6  -2    1.55    0.39
  -6  -6  -2    0.42    0.35
  -6  -6  -2    0.04    0.38
   6  -6   2    0.72    0.26
  -6   6   2    0.66    0.42
   6  -6   2    0.86    0.23
  -6   6   2    0.62    0.25
  -6   6   2    0.44    0.22
  -6  -6   2    1.69    0.37
  -6  -6   2    2.11    0.57
  -6   6  -2    0.89    0.22
   6  -6  -2    0.62    0.24
   6   6   2    0.07    0.31
  -6   6  -2    0.85    0.24
   6   6   2    0.19    0.34
  -6  -6   2    1.56    0.50
  -6   6  -2    0.71    0.20
  -6  -6   2    1.86    0.52
  -6  -6   2    1.36    0.41
  -6   6  -2    0.87    0.45
  -6  -6   2    1.84    0.54
  -6   6  -2    0.75    0.47
   6  -6  -2    0.38    0.24
  -6  -6   2    2.10    0.49
   6   6   2    0.09    0.25
  -6   6  -2    0.88    0.24
   7   6  -2   14.47    1.51
   7   6  -2   14.67    1.42
   7   6  -2   13.99    1.50
  -7  -6   2   15.02    1.47
  -7  -6   2   15.14    1.71
   8  -6   2   32.39    2.72
   8   6  -2   39.86    2.93
  -8  -6   2   42.15    2.88
  -8   6  -2   33.90    2.65
  -8   6  -2   33.83    2.59
  -8   6  -2   31.30    2.50
  -8   6  -2   29.80    3.41
  -8   6  -2   33.84    2.77
   0  -7   2    0.52    0.14
   0  -7   2    0.89    0.18
   0   7  -2    0.19    0.14
   0   7  -2    0.37    0.17
   0   7  -2    0.05    0.18
   0  -7   2    0.19    0.14
   0  -7   2    0.54    0.16
  -2   7   2   97.77    7.66
  -2   7   2   94.17    6.63
  -2   7   2   93.88    6.56
  -2  -7  -2   92.87    6.87
  -2   7   2   92.25    6.55
  -2  -7  -2   98.81    6.93
  -2  -7  -2  102.28    6.86
  -2  -7  -2   93.55    7.01
  -2  -7  -2   89.77    6.64
  -2   7   2   93.63    6.31
  -2  -7  -2  101.06    6.72
  -2   7   2   93.29    6.63
   2   7   2  103.52    6.61
   2   7   2   95.00    6.90
   2   7   2   96.09    7.80
   2   7   2  101.47    6.87
   2   7   2   95.21    6.78
   2   7   2   99.49    6.79
  -3  -7  -2  119.17    8.63
  -3  -7  -2  109.09    8.71
  -3  -7  -2  108.19    8.55
  -3  -7  -2  122.71    8.54
  -3  -7  -2  118.77    8.32
  -3  -7  -2  122.20    8.36
   3   7   2  118.23    9.67
   3   7   2  124.48    8.62
   3   7   2  127.22    8.29
   3   7   2  126.70    8.49
   3   7   2  124.36    8.45
   5   7  -2   17.16    1.48
   5   7  -2   18.70    1.60
   5   7  -2   17.96    1.56
   5   7  -2   18.21    1.44
  -5  -7   2   17.91    1.80
  -5  -7   2   18.34    1.67
  -5  -7   2   19.16    1.78
  -5  -7   2   17.93    1.58
  -5  -7   2   17.43    1.67
  -5  -7   2   18.54    1.72
  -5  -7   2   16.55    1.63
  -6   7   2    0.68    0.45
   6   7  -2    0.17    0.25
   6   7  -2    0.05    0.32
   6   7  -2    0.19    0.30
  -6  -7   2    0.44    0.42
  -6  -7   2    0.29    0.31
  -6   7  -2    0.97    0.21
  -6   7  -2    0.82    0.21
  -6   7  -2    0.76    0.23
  -6   7  -2    0.87    0.18
  -6   7  -2    0.97    0.48
  -6  -7   2    0.65    0.44
  -6  -7   2    0.58    0.45
  -6   7  -2    0.82    0.19
  -6  -7   2    0.77    0.44
  -6  -7   2    0.27    0.26
  -6   7  -2    0.79    0.21
  -6  -7   2    0.36    0.35
  -7   7   2    6.28    0.71
  -7   7   2    6.43    0.72
  -7   7   2    6.34    0.61
  -7   7   2    7.38    0.64
  -7   7   2    6.12    0.61
  -7   7   2    6.86    1.15
  -7   7   2    6.41    0.59
   7   7  -2    6.90    0.85
  -7  -7   2    6.61    0.93
  -7  -7   2    6.55    1.12
  -7  -7   2    6.78    0.97
  -8   7   2    8.11    1.38
  -8   7   2    8.41    0.94
  -8   7   2    9.23    0.82
  -8   7   2    9.13    0.96
   1  -8   2   35.52    2.55
   1  -8   2   36.02    2.81
   1  -8   2   37.74    2.55
   1  -8   2   37.40    2.48
  -1   8  -2   35.44    2.47
  -1   8  -2   36.14    2.56
  -1   8  -2   34.42    2.59
  -1   8  -2   34.58    2.59
  -1   8  -2   34.59    2.54
  -2  -8  -2   50.65    3.85
  -2  -8  -2   52.33    3.64
  -2  -8  -2   46.41    3.61
  -2   8   2   48.43    3.49
  -2   8   2   50.30    4.09
  -2  -8  -2   47.93    3.76
  -2   8   2   49.02    3.50
  -2  -8  -2   53.17    3.73
  -2  -8  -2   47.66    3.72
  -2   8   2   49.30    3.34
  -2   8   2   49.05    3.46
  -2   8   2   46.47    3.44
   2   8   2   50.13    3.80
   2   8   2   50.26    3.71
   2   8   2   48.82    3.73
   2   8   2   53.80    3.65
   2  -8  -2   47.78    3.35
   2   8   2   52.74    4.29
   3   8  -2   26.48    2.19
   3   8  -2   28.00    2.28
  -3  -8   2   27.24    2.28
  -3  -8   2   27.56    2.27
  -3  -8   2   26.49    2.14
  -3  -8   2   25.60    2.15
  -3  -8   2   24.32    2.16
  -3  -8   2   24.83    2.18
  -3  -8   2   28.29    2.11
  -4  -8  -2   49.40    3.89
  -4  -8  -2   51.98    3.84
  -4  -8  -2   52.19    4.18
  -4  -8  -2   49.80    4.08
  -4  -8  -2   52.34    3.99
  -4  -8  -2   50.27    3.78
  -4  -8  -2   47.58    3.90
   4   8   2   48.94    4.40
  -5  -8  -2    6.68    0.83
  -5  -8  -2    6.51    0.91
  -5  -8  -2    7.27    0.99
  -5  -8  -2    6.25    0.93
  -5  -8  -2    7.22    1.05
  -5  -8  -2    6.77    0.90
   5   8   2    7.33    0.77
   5   8   2    6.73    0.59
   6   8  -2    4.39    0.65
  -6  -8  -2    7.58    1.07
  -6  -8  -2    6.51    0.94
  -6  -8  -2    6.93    1.14
  -6  -8  -2    6.12    0.91
  -6  -8   2    3.37    0.75
   6   8   2    6.70    0.80
  -6  -8   2    4.45    0.86
  -6  -8   2    4.38    0.83
  -6  -8   2    4.54    0.94
  -7   8  -2    6.81    0.73
  -7   8  -2    7.03    1.24
  -7   8  -2    6.32    0.73
  -1  -9  -2   19.00    1.72
  -1  -9  -2   18.72    1.66
  -1  -9  -2   22.94    1.75
  -1  -9  -2   20.13    1.72
   1   9   2   20.33    1.79
   1   9   2   21.36    1.76
   1   9   2   20.74    2.08
   1   9   2   22.80    1.75
   1   9   2   20.84    1.74
  -2   9   2   14.60    1.18
  -2   9   2   14.38    1.16
  -2   9   2   14.40    1.12
  -2   9   2   15.43    1.18
  -2   9   2   15.62    1.44
  -2   9   2   14.13    1.16
   2   9  -2   15.57    1.39
   2   9  -2   15.50    1.38
   2   9  -2   13.78    1.39
   2   9  -2   16.06    1.44
   2   9  -2   17.48    1.56
   2  -9  -2   14.73    1.12
  -2  -9   2   14.10    1.32
   2  -9  -2   15.00    1.17
  -2  -9   2   13.80    1.34
  -2  -9   2   14.32    1.34
  -2  -9   2   15.79    1.36
   2  -9  -2   13.74    1.11
   3   9  -2   48.59    3.69
   3   9  -2   46.22    3.73
  -3   9   2   54.70    3.34
  -3   9   2   53.89    3.33
  -3  -9   2   40.38    3.63
  -3  -9   2   48.60    3.81
  -3  -9   2   46.52    3.65
  -3  -9   2   41.78    3.66
  -3  -9   2   45.05    3.57
  -6  -9   2    6.38    1.04
  -6   9  -2    5.52    0.56
  -6   9  -2    5.31    0.52
  -6  -9   2    5.35    0.87
  -6   9  -2    5.45    1.07
  -6  -9   2    5.51    0.94
  -7   9   2    1.25    0.68
  -7   9   2    1.30    0.31
  -7   9   2    1.22    0.30
   0  10   2   23.46    1.80
   0 -10  -2   23.17    1.76
   0 -10  -2   22.05    1.77
   0  10  -2   18.77    1.72
   0  10   2   22.58    1.84
   0 -10   2   20.30    1.72
   0 -10   2   19.72    1.70
   0  10   2   24.66    2.13
   0  10  -2   18.95    1.72
   0  10   2   22.36    1.78
   0  10   2   23.40    1.79
   0 -10   2   19.70    1.66
   0  10  -2   20.32    1.67
   0  10  -2   19.55    1.72
   0  10  -2   20.93    1.73
   0  10   2   22.43    1.75
   0 -10  -2   21.04    1.70
  -2  10   2   12.28    1.00
  -2  10   2   12.44    0.96
  -2  10   2   11.82    1.00
  -2  10   2   11.82    1.01
  -2  10   2   11.60    0.99
   2 -10  -2   11.31    0.98
   2 -10  -2   12.48    0.99
  -3 -10  -2   24.87    2.27
  -3  10   2   24.80    1.87
  -3 -10  -2   23.86    2.21
  -3 -10  -2   26.16    2.24
  -3  10   2   21.95    1.85
  -3  10  -2   26.38    1.82
   3  10   2   25.50    2.35
   3  10   2   27.13    2.62
  -3  10  -2   28.83    1.85
  -4  10   2   10.18    0.77
  -4  10   2    9.10    0.76
  -6  10   2    4.16    0.43
   0  11  -2    1.31    0.34
   0  11   2    2.17    0.44
   0 -11  -2    2.00    0.42
   0  11   2    1.73    0.42
   0  11  -2    0.71    0.31
   0  11  -2    0.68    0.32
   0 -11   2    0.97    0.32
   0  11   2    1.97    0.44
   0  11  -2    1.03    0.34
   0  11   2    1.94    0.45
   0 -11   2    1.05    0.34
   0 -11  -2    1.69    0.41
   0  11   2    1.59    0.41
   0  11  -2    0.71    0.32
   1 -11   2    8.37    0.91
  -1  11   2   11.64    1.02
   1 -11   2    9.01    0.92
  -1  11   2   11.37    1.01
   1 -11   2    8.48    0.89
  -1  11   2   11.62    0.98
  -1  11   2   11.57    1.00
  -1  11   2   11.45    1.02
  -1  11  -2    8.10    0.88
  -1  11  -2    8.69    0.93
  -1  11  -2    8.20    0.92
   1 -11  -2   11.71    0.99
   1 -11  -2   11.17    1.00
   2 -11   2   25.17    2.22
  -2  11   2   33.14    2.32
  -2  11   2   32.87    2.23
  -2  11   2   34.41    2.38
  -2  11   2   33.32    2.37
   2 -11  -2   33.38    2.38
   2 -11  -2   34.50    2.32
  -2  11  -2   24.53    2.28
   3  11  -2   46.14    3.47
  -3  11   2   38.54    2.94
  -3  11   2   39.22    2.93
  -3 -11   2   41.10    3.32
  -3  11  -2   39.95    2.92
  -3 -11   2   40.70    3.34
  -3  11  -2   38.85    2.90
  -3 -11   2   46.35    3.38
  -4  11   2    8.56    0.71
  -4  11   2    7.96    0.70
   0  12  -2   -0.17    0.29
   0  12   2    1.64    0.43
   0  12  -2    0.45    0.30
   0  12  -2    0.47    0.28
   0  12  -2    0.31    0.30
   0 -12   2    0.34    0.28
   0 -12   2    0.29    0.28
  -1  12   2    9.10    0.99
  -1  12   2   10.15    1.01
  -1  12   2    9.23    1.03
  -1  12   2    9.82    1.04
  -1 -12  -2   12.95    1.22
  -1 -12  -2   12.54    1.24
  -1  12   2    9.22    0.96
   1 -12  -2    9.86    1.03
   1  12   2   13.22    1.29
   1 -12  -2    9.33    1.03
   2  12  -2   10.57    1.25
  -2  12   2   10.29    1.02
  -2  12   2   10.31    1.01
  -2  12   2   10.39    0.90
  -2  12   2   10.83    0.92
  -2  12   2   10.13    0.87
  -2 -12   2   10.45    1.18
  -2 -12   2   10.44    1.20
  -3 -12  -2   13.49    1.47
  -3 -12  -2   13.44    1.49
  -3  12  -2   11.82    1.03
  -3  12  -2   11.46    1.02
  -4  12   2   18.64    1.41
  -4  12   2   17.72    1.39
   0  13  -2   11.99    1.28
   0 -13   2   11.59    1.25
   0 -13   2   11.93    1.23
   1  13  -2    2.77    0.63
   1 -13   2    1.80    0.49
   1  13  -2    3.01    0.61
  -1 -13   2    2.85    0.61
  -1  13  -2    2.23    0.46
  -1  13  -2    1.81    0.49
  -1 -13   2    2.83    0.66
  -1  13  -2    2.25    0.51
  -2  13   2    9.10    0.99
  -2  13   2    7.49    0.94
  -2  13  -2   10.86    1.00
  -2  13  -2   10.31    0.97
   0   0   3  166.39   12.31
   0   0  -3  174.83   12.31
   0   0   3  180.17   12.61
   0   0   3  176.37   12.49
   0   0  -3  190.70   12.73
   0   0   3  179.86   12.59
   0   0   3  186.00   14.20
   0   0  -3  179.22   12.31
   0   0   3  182.87   12.31
   0   0  -3  175.48   12.60
   0   0   3  177.95   11.84
   0   0   3  187.21   12.32
   0   0   3  176.18   12.60
   0   0  -3  180.96   12.47
   0   0   3  178.58   12.73
   0   0   3  184.18   12.32
   0   0  -3  184.72   14.17
   0   0  -3  200.21   12.61
   0   0   3  195.25   12.47
   0   0  -3  186.57   12.31
   0   0  -3  185.86   12.44
   3   0  -3  182.80   12.00
   3   0  -3  191.81   12.30
   3   0  -3  174.67   12.13
   3   0  -3  184.12   12.16
  -3   0   3  171.86   12.03
  -3   0   3  168.16   12.15
   3   0  -3  179.27   11.82
  -3   0   3  168.49   12.15
   3   0  -3  179.57   12.18
  -3   0   3  189.30   12.27
  -3   0   3  176.25   11.80
   3   0  -3  185.72   12.78
   3   0  -3  169.30   12.28
  -3   0   3  176.99   12.03
   3   0  -3  170.67   12.28
   3   0  -3  178.38   11.98
   3   0  -3  179.94   12.28
  -3   0   3  176.81   12.26
  -3   0   3  169.81   11.57
  -3   0   3  175.31   11.57
  -3   0   3  181.67   13.86
  -3   0   3  184.37   12.15
  -3   0   3  162.43   12.41
  -4   0  -3   55.98    3.64
   4   0  -3   46.92    3.67
  -4   0  -3   49.45    3.96
  -4   0   3   50.91    3.70
  -4   0  -3   53.55    3.62
  -4   0   3   49.30    3.51
  -4   0  -3   53.01    3.69
   4   0  -3   50.12    3.58
   4   0  -3   48.00    3.63
   4   0   3   56.79    3.66
  -4   0   3   50.65    3.62
   4   0   3   55.47    3.96
  -4   0   3   49.33    3.50
  -4   0   3   48.07    3.89
   4   0  -3   50.45    3.56
   4   0   3   51.79    3.69
   4   0   3   50.62    3.70
  -4   0   3   48.26    3.67
  -4   0   3   50.09    3.63
  -4   0   3   51.52    4.17
   4   0  -3   49.44    3.63
   4   0  -3   47.34    3.67
  -4   0  -3   51.38    3.62
  -4   0  -3   51.95    3.74
  -4   0  -3   51.03    3.66
  -4   0   3   49.03    3.49
  -4   0   3   49.42    3.60
   4   0   3   51.41    3.74
   4   0   3   51.27    3.63
   4   0  -3   52.38    3.91
  -4   0   3   46.48    3.74
  -4   0   3   52.81    3.61
   4   0   3   51.86    3.66
  -4   0  -3   51.29    3.50
  -5   0   3   57.98    4.37
  -5   0   3   62.64    4.32
   5   0  -3   61.73    4.23
  -5   0   3   59.69    4.16
  -5   0   3   56.61    4.44
  -5   0   3   62.02    4.39
  -5   0   3   60.96    4.31
  -5   0   3   59.75    4.17
   5   0  -3   59.48    4.31
   5   0  -3   62.71    4.26
   5   0  -3   58.91    4.31
   5   0  -3   56.96    4.35
  -5   0   3   62.33    4.96
  -5   0   3   60.71    4.65
   5   0  -3   55.71    4.34
  -6   0   3    5.14    0.70
  -6   0   3    4.78    0.66
   6   0  -3    4.55    0.63
  -6   0   3    4.83    0.65
   6   0  -3    4.49    0.63
  -6   0   3    5.57    0.72
  -6   0   3    4.57    0.72
  -6   0   3    5.16    0.78
   6   0  -3    4.94    0.63
   6   0  -3    4.37    0.63
  -6   0   3    6.02    0.79
   6   0  -3    4.80    0.69
  -6   0   3    4.98    0.66
  -6   0   3    4.80    0.67
  -8   0   3   81.53    6.23
  -8   0   3   80.99    6.16
   8   0  -3   84.31    6.07
  -8   0   3   84.04    6.94
  -8   0   3   85.85    5.84
   8   0  -3   78.19    6.09
   8   0  -3   79.33    6.11
   9   0  -3   23.31    2.20
   9   0  -3   24.94    2.22
   0   1  -3  211.65   14.66
   0  -1  -3  229.05   14.96
   0  -1  -3  233.93   14.83
   0  -1   3  204.50   14.61
   0  -1   3  196.39   14.46
   0   1  -3  210.50   16.67
   0   1   3  230.65   14.83
   0  -1   3  205.29   16.68
   0  -1  -3  207.27   14.82
   0  -1   3  190.67   14.66
   0   1   3  220.33   14.98
   0   1   3  223.58   16.70
   0   1   3  215.31   14.49
   0   1   3  237.56   14.67
   0   1  -3  204.60   14.80
   0  -1   3  201.22   14.81
   0  -1  -3  217.38   13.92
   0  -1   3  201.52   14.95
   0  -1  -3  212.96   14.48
   0   1   3  217.26   14.49
   0  -1  -3  224.74   14.67
   0  -1   3  209.72   13.91
   0  -1  -3  238.68   14.69
   0  -1   3  216.80   14.78
   0  -1   3  201.37   14.59
   0  -1   3  207.16   14.80
   0   1  -3  207.75   14.78
   0   1   3  212.81   14.68
   0   1   3  227.16   14.81
   0   1  -3  205.12   14.61
   0   1   3  213.48   14.62
   0   1   3  244.05   14.81
   0   1  -3  201.94   14.67
   0   1  -3  204.38   14.61
   0  -1  -3  234.20   14.63
   0   1  -3  198.21   14.46
   0  -1   3  208.66   14.47
   0   1   3  217.15   14.82
   0  -1   3  212.19   14.46
   0  -1  -3  238.54   14.49
   0  -1  -3  235.36   14.49
   0  -1   3  225.17   14.65
   0   1  -3  206.21   14.94
   0   1  -3  200.33   14.81
   0   1  -3  202.29   13.91
   0   1   3  216.40   13.93
   0  -1   3  205.09   14.80
   0   1  -3  190.26   14.46
   0  -1  -3  201.90   14.46
   0  -1  -3  235.14   14.81
   0  -1   3  190.56   14.46
   0  -1  -3  231.25   14.63
   0   1  -3  210.03   14.51
   0   1   3  233.00   14.26
   0  -1  -3  225.64   16.67
   1  -1   3  469.05   34.94
   1   1  -3  538.89   36.86
   1   1  -3  515.18   34.63
   1  -1   3  499.40   36.60
   1   1  -3  555.70   39.84
   1   1  -3  545.95   35.40
   1  -1   3  477.26   35.78
   1  -1   3  534.85   33.30
   1  -1   3  509.75   35.46
   1  -1   3  500.61   35.41
   1  -1   3  484.49   34.72
   1  -1   3  521.17   35.42
   1   1  -3  538.18   34.97
   1   1  -3  552.56   35.76
   1   1  -3  526.42   33.30
   1   1  -3  555.34   35.42
   1   1  -3  539.83   35.09
   1   1  -3  531.44   35.44
   1  -1   3  510.86   34.71
   1  -1   3  500.35   35.15
   1   1  -3  511.95   35.43
   1   1  -3  524.90   34.05
   1   1  -3  536.62   34.97
   1   1  -3  536.26   34.66
   1   1  -3  543.41   35.14
   1   1  -3  530.91   34.66
   1  -1   3  515.99   35.10
   1  -1   3  514.26   34.98
  -1  -1   3  523.87   34.65
  -1  -1   3  517.39   33.28
  -1  -1   3  524.60   35.78
  -1  -1   3  506.74   34.06
  -1   1  -3  482.56   34.98
  -1   1  -3  455.24   33.28
  -1   1  -3  514.88   34.66
  -1   1  -3  506.60   35.58
  -1   1  -3  488.99   35.50
  -1  -1   3  522.83   35.43
  -1  -1   3  517.58   35.13
  -1   1  -3  520.32   35.52
  -1  -1   3  520.79   36.88
  -1  -1   3  571.85   35.41
  -1  -1   3  540.24   35.41
  -1  -1   3  508.96   34.64
  -1   1  -3  458.25   34.65
  -1   1  -3  457.38   34.94
  -1  -1   3  529.10   34.96
  -1   1  -3  493.89   35.76
  -1   1  -3  469.26   36.61
  -1  -1   3  512.37   34.96
  -1  -1   3  527.16   34.63
   2  -1   3  311.93   21.34
   2  -1   3  328.92   21.10
   2  -1   3  314.99   19.84
  -2   1   3  277.17   23.78
   2  -1   3  315.52   20.84
  -2   1   3  286.37   21.32
  -2   1   3  281.97   20.83
  -2   1   3  292.59   20.65
  -2   1   3  285.92   23.78
  -2   1   3  289.65   20.83
  -2   1   3  285.56   20.64
   2  -1   3  310.78   20.65
  -2   1   3  304.46   20.44
   2  -1   3  334.11   21.87
   2  -1   3  310.65   21.15
   2  -1   3  317.36   21.12
  -2   1   3  279.34   21.83
   2  -1   3  336.69   20.93
   2  -1   3  331.16   20.63
  -2   1   3  286.27   19.83
   2  -1   3  332.93   21.14
   2  -1  -3  305.89   21.09
  -2   1  -3  340.08   20.87
   2  -1  -3  294.83   21.11
  -2   1  -3  320.81   21.21
   2  -1  -3  297.12   21.10
   2  -1  -3  296.71   23.75
   2  -1  -3  292.95   20.93
  -2   1  -3  335.29   19.88
  -2   1  -3  320.57   20.69
  -2   1  -3  308.12   21.87
   2  -1  -3  315.63   20.68
  -2   1  -3  328.37   21.29
   2  -1  -3  294.98   21.84
  -2   1  -3  312.53   20.65
   2  -1  -3  297.25   21.30
   2  -1  -3  296.66   20.83
   2  -1  -3  297.89   20.29
   2  -1  -3  296.14   21.12
   2  -1  -3  300.49   20.82
   3  -1   3  192.55   13.57
   3  -1   3  203.74   13.61
   3  -1   3  218.99   13.81
   3  -1   3  211.12   13.41
   3  -1   3  216.11   13.74
   3  -1   3  189.90   13.43
   3  -1   3  202.94   13.26
   3  -1   3  199.61   13.79
   3  -1   3  187.34   13.73
   3  -1   3  205.03   14.30
  -3   1  -3  183.90   14.29
  -3   1  -3  191.59   13.44
  -3   1  -3  183.47   13.59
  -3   1  -3  197.34   13.48
  -3   1  -3  205.45   13.60
  -3   1  -3  187.99   12.92
  -4  -1  -3   84.91    6.18
   4   1  -3   84.62    6.08
   4   1  -3   92.19    6.44
  -4  -1  -3   83.85    6.13
  -4  -1  -3   86.30    6.16
  -4  -1  -3   85.50    6.05
   4   1  -3   84.82    6.16
  -4  -1  -3   81.45    5.81
  -4  -1  -3   83.71    5.91
  -4  -1  -3   78.34    5.90
  -4  -1  -3   79.66    6.49
  -4  -1  -3   86.80    6.10
   4   1  -3   82.21    6.09
   4   1  -3   87.74    6.01
   4   1  -3   89.63    5.95
   4  -1   3  104.62    6.17
  -4  -1  -3   87.24    6.13
  -4  -1  -3   87.54    6.05
   4   1  -3   80.79    6.14
  -4  -1   3   79.41    6.40
  -4  -1   3   86.64    5.85
  -4   1  -3   98.96    6.55
   4   1   3   83.89    6.17
  -4  -1   3   86.73    5.92
  -4  -1   3   88.04    6.15
  -4  -1   3   87.95    6.12
   4   1   3   85.29    6.12
  -4  -1   3   81.89    5.90
   4   1   3   82.12    6.05
  -4  -1   3   88.84    6.05
  -4  -1   3   88.72    5.92
  -4   1  -3  101.89    5.82
  -4  -1   3   88.79    6.92
   4   1   3   86.98    6.16
   4   1   3   81.90    6.21
   4   1   3   91.16    6.02
  -4  -1   3   91.91    6.04
  -4  -1   3   90.52    6.14
  -4  -1   3   85.63    6.14
  -4  -1   3   81.31    6.26
  -4  -1   3   83.41    6.03
  -4  -1   3   89.72    6.07
   5   1  -3   48.60    3.84
   5   1  -3   50.16    3.82
   5   1  -3   55.62    3.77
   5   1  -3   51.78    3.82
   5   1  -3   54.58    3.77
   5   1  -3   50.31    3.85
  -5  -1   3   48.59    3.95
  -5  -1   3   50.81    3.69
  -5  -1   3   53.48    3.90
  -5  -1   3   52.74    3.67
  -5  -1   3   53.52    3.79
  -5  -1   3   49.86    4.08
  -5  -1   3   52.43    3.67
  -5  -1   3   53.64    3.82
  -5  -1   3   52.41    4.33
  -5  -1   3   51.16    3.89
  -5  -1   3   55.59    3.80
  -5  -1   3   55.11    3.83
  -6   1   3   14.71    1.29
  -6   1   3   12.32    1.18
  -6   1   3   13.82    1.23
  -6   1   3   13.04    1.39
  -6  -1  -3   17.27    1.46
  -6   1   3   12.06    1.22
  -6   1   3   12.59    1.42
  -6   1   3   13.05    1.19
  -6   1   3   12.61    1.24
  -6   1   3   13.91    1.24
   6  -1  -3   12.69    1.17
   6  -1  -3   11.98    1.17
   6  -1  -3   13.28    1.22
  -7   1   3   23.77    1.87
  -7   1   3   24.09    2.12
   7  -1   3   16.37    1.77
  -7   1   3   22.84    2.05
  -7   1   3   22.93    1.85
  -7   1   3   25.06    1.78
   7  -1   3   16.15    1.68
  -7   1  -3   17.17    2.14
  -7   1  -3   17.10    1.82
   7  -1  -3   22.32    1.77
  -7   1  -3   17.20    1.83
  -7   1  -3   16.40    1.75
  -7   1  -3   17.51    1.67
   7  -1  -3   22.94    1.79
  -8   1   3   41.82    3.37
  -8   1   3   41.43    3.80
  -8   1   3   40.83    3.34
  -8   1   3   43.64    3.17
   8  -1  -3   40.39    3.27
   8  -1  -3   38.94    3.26
   8  -1  -3   40.85    3.23
   0   2  -3  151.29   10.78
   0  -2   3  148.10   12.08
   0  -2   3  168.44   12.06
   0  -2   3  150.85   10.70
   0   2  -3  158.24   10.72
   0  -2   3  159.42   10.47
   0  -2   3  153.92   10.04
   0  -2   3  162.34   10.67
   0   2  -3  151.42   10.45
   0   2  -3  153.70   10.55
   0  -2   3  151.35   10.59
   0  -2   3  164.69   10.57
   0   2  -3  153.66   10.05
   0   2  -3  150.87   10.55
   0  -2   3  153.35   10.69
   0  -2   3  152.55   10.69
   0   2  -3  147.90   10.45
   0  -2   3  158.36   11.47
   0  -2   3  154.53   10.47
   0  -2   3  151.73   10.54
   0  -2   3  151.84   10.54
   0  -2   3  151.74   10.79
   0   2  -3  157.14   10.72
   0   2  -3  155.05   12.06
   0   2  -3  152.63   12.06
   1   2  -3  799.92   51.27
   1   2  -3  751.07   50.83
   1   2  -3  796.58   49.69
   1   2  -3  771.54   50.13
   1   2  -3  799.34   50.77
   1   2  -3  720.50   49.74
   1   2  -3  770.67   47.73
   1   2  -3  761.86   50.31
   1   2  -3  739.96   49.68
   1   2  -3  759.41   50.37
   1   2  -3  771.88   47.75
   1   2  -3  760.74   50.74
   1   2  -3  791.07   50.81
   1   2  -3  757.42   48.81
  -1  -2   3  772.18   50.12
  -1  -2   3  735.84   50.79
   1  -2  -3  594.00   57.04
  -1  -2   3  702.40   47.69
  -1  -2   3  712.59   50.09
  -1  -2   3  803.83   49.70
  -1  -2   3  802.43   49.66
   1  -2  -3  610.17   50.82
   1  -2  -3  604.26   50.08
  -1  -2   3  723.41   51.27
  -1  -2   3  801.43   47.75
  -1  -2   3  758.66   50.81
  -1  -2   3  691.96   48.81
   1  -2  -3  588.38   47.69
  -1  -2   3  754.38   49.65
  -1  -2   3  786.64   53.12
   2  -2   3  284.18   20.54
   2  -2   3  287.51   20.35
   2  -2   3  294.74   20.37
   2  -2   3  300.82   20.33
   2  -2   3  305.67   21.07
   2  -2   3  292.74   20.07
   2  -2   3  307.71   20.34
  -2   2  -3  311.21   20.56
  -2   2  -3  301.61   20.11
  -2   2  -3  294.78   20.09
  -2   2  -3  295.10   23.05
  -2   2  -3  302.69   19.14
  -2   2  -3  283.60   21.07
  -2   2  -3  282.88   19.91
  -2   2  -3  286.29   19.89
  -3   2   3  130.63   10.18
  -3   2   3  124.96    9.37
  -3   2   3  131.67    8.77
  -3   2   3  128.38    8.44
  -3   2   3  128.36    8.87
  -3   2   3  130.27    8.87
  -4  -2  -3   85.30    6.40
  -4  -2  -3   93.23    6.31
  -4  -2  -3   88.07    6.28
  -4  -2  -3   91.17    6.53
  -4  -2  -3   99.24    6.55
  -4  -2  -3   92.65    6.29
  -4  -2  -3   92.58    6.37
  -4  -2  -3   87.38    6.48
  -4  -2  -3   87.78    6.13
  -4  -2  -3   89.97    6.68
  -4  -2  -3   89.69    6.42
  -4  -2  -3   83.59    6.82
   4   2   3   95.53    6.52
   4   2   3  100.80    6.36
   4   2   3   91.16    6.51
   4   2   3   91.70    6.56
   4   2   3   91.30    6.46
  -5  -2  -3   42.41    3.08
  -5  -2  -3   43.49    3.18
  -5  -2  -3   40.09    3.33
  -5  -2  -3   43.36    2.97
  -5  -2  -3   41.85    3.03
  -5  -2  -3   39.41    3.43
  -5  -2  -3   42.17    3.19
  -5  -2  -3   41.60    3.14
  -5  -2  -3   39.92    2.94
  -5  -2  -3   41.91    3.27
   5   2   3   43.73    3.15
   5   2   3   42.80    3.27
   5   2   3   41.51    3.16
   5   2   3   40.47    3.17
  -6   2   3   34.56    2.73
  -6   2   3   37.25    2.76
   6   2  -3   32.17    2.76
  -6   2   3   37.00    2.63
   6   2  -3   32.83    2.77
  -6   2   3   35.85    3.01
   6   2  -3   32.91    2.74
  -6   2   3   37.83    2.73
  -6   2   3   39.15    2.74
   6   2  -3   36.28    2.72
  -6   2   3   35.22    2.77
  -6   2   3   35.85    3.20
  -6   2   3   34.38    2.61
   6  -2  -3   35.40    2.71
   6  -2  -3   37.75    2.69
   6  -2  -3   36.28    2.74
  -6  -2   3   34.46    2.99
  -6  -2   3   35.17    2.87
  -6  -2   3   34.79    2.59
  -6  -2   3   38.08    2.74
  -6  -2   3   33.94    2.69
  -6  -2   3   35.56    2.71
  -6  -2   3   36.08    3.12
  -6  -2   3   31.71    2.87
   7   2  -3   48.02    3.77
   7   2  -3   48.72    3.74
   7   2  -3   49.59    3.67
   7   2  -3   44.88    3.75
  -7  -2   3   49.18    4.06
  -7  -2   3   46.55    3.90
  -7  -2   3   52.36    4.24
  -8   2   3   49.25    3.23
   8  -2   3   38.90    3.29
  -8   2   3   47.72    3.41
  -8   2   3   50.08    3.42
   8  -2   3   42.50    3.47
  -8   2   3   46.14    3.90
  -8  -2  -3   35.24    3.96
  -8   2   3   48.92    3.39
   8  -2  -3   48.91    3.38
   8   2   3   34.53    3.42
  -8   2  -3   39.59    3.41
   8   2   3   35.65    3.36
  -8   2  -3   39.30    3.17
   8  -2  -3   44.23    3.32
   8   2   3   33.23    3.29
  -8   2  -3   37.28    4.00
  -8   2  -3   37.91    3.37
  -9   2   3   12.26    1.44
  -9   2   3   14.38    1.38
  -9   2   3   13.19    1.68
   9  -2  -3   12.21    1.38
   0  -3   3   96.56    5.63
   0   3   3   71.07    5.43
   0  -3  -3   76.49    5.62
   0  -3  -3   72.59    6.43
   0   3  -3   86.58    5.35
   0   3   3   71.84    5.57
   0  -3  -3   74.64    5.76
   0  -3  -3   77.24    5.53
   0   3  -3   90.55    5.56
   0  -3  -3   73.86    5.70
   0  -3   3   91.14    5.88
   0  -3  -3   72.35    5.47
   0   3   3   75.02    5.57
   0   3  -3   92.36    5.63
   0   3   3   77.30    5.64
   0  -3  -3   75.66    5.68
   0  -3  -3   72.74    5.34
   0   3   3   69.67    6.45
   0  -3   3   94.85    5.68
   0  -3  -3   74.46    5.68
   0   3   3   72.76    5.64
   0  -3   3   94.43    5.70
   0   3   3   77.24    5.65
   0  -3  -3   71.33    5.61
   0   3  -3   94.46    5.76
   0   3  -3   93.22    6.43
   0   3  -3   87.77    5.62
   0   3   3   76.32    5.77
   0   3   3   77.61    5.37
   0  -3   3   92.30    5.61
   0  -3   3   90.69    5.75
   0   3  -3   92.61    6.42
   0   3  -3   94.39    5.57
   0   3   3   77.80    5.64
   0  -3  -3   72.56    5.54
   1   3  -3  212.23   14.14
   1   3  -3  196.94   13.67
   1   3  -3  213.96   13.84
   1   3  -3  203.51   13.15
   1   3  -3  199.85   13.66
   1   3  -3  187.57   13.14
   1   3  -3  195.90   13.67
   1   3  -3  216.03   13.96
  -1   3   3  158.85   14.08
   1   3  -3  200.66   13.95
   1   3  -3  198.85   13.81
   1   3  -3  206.60   13.82
   1   3  -3  196.73   13.40
   1   3  -3  202.19   13.93
   1   3  -3  197.36   13.81
   1   3  -3  212.90   13.66
   1   3  -3  219.54   13.95
  -1  -3   3  193.20   14.11
  -1  -3   3  218.53   13.65
  -1  -3   3  200.37   13.15
  -1  -3   3  209.00   13.64
  -1  -3   3  212.45   13.96
  -1  -3   3  199.53   13.79
  -1  -3   3  196.43   13.43
  -1  -3   3  207.54   13.81
  -1  -3   3  205.72   15.71
  -1  -3   3  190.75   13.84
  -1  -3   3  193.64   13.96
  -1  -3   3  201.18   13.97
  -1  -3   3  216.98   13.97
  -1  -3   3  209.70   14.46
  -1  -3   3  196.75   13.12
   2   3  -3  327.82   21.45
   2   3  -3  322.29   21.81
   2   3  -3  329.98   22.33
   2   3  -3  331.51   21.79
   2   3  -3  313.61   21.85
   2   3  -3  322.96   22.32
   2   3  -3  315.69   22.06
  -2  -3   3  325.50   21.83
  -2  -3   3  322.48   22.14
  -2  -3   3  331.84   23.06
  -2  -3   3  333.07   22.07
  -2  -3   3  309.93   22.32
  -2  -3   3  331.24   21.49
  -2  -3   3  323.34   22.58
  -2  -3   3  316.38   22.34
  -3   3   3  138.99   11.23
  -3   3   3  136.58   11.22
   3   3  -3  178.52   11.39
  -3   3   3  149.88   11.49
   3   3  -3  171.21   11.19
  -3   3   3  140.81   10.69
   3   3  -3  176.22   11.48
   3   3  -3  185.62   11.50
  -3   3   3  138.94   12.91
   3   3  -3  180.09   11.38
  -3   3   3  147.26   11.13
  -3   3   3  153.34   11.14
  -3   3   3  143.58   11.88
   3  -3  -3  158.54   11.40
   3  -3  -3  157.45   10.93
  -3  -3   3  175.35   11.07
   3  -3  -3  158.36   11.49
  -3  -3   3  178.36   11.40
   3  -3  -3  152.18   11.91
  -3  -3   3  178.49   11.40
  -3  -3   3  175.76   11.66
  -3  -3   3  177.44   11.50
   3  -3  -3  160.88   11.39
  -3  -3   3  182.19   11.25
  -3  -3   3  177.37   11.20
  -3  -3   3  181.15   11.89
  -3  -3   3  186.85   11.52
  -3  -3   3  186.05   11.41
   3  -3  -3  153.30   11.43
  -4  -3  -3  126.71    8.97
  -4  -3  -3  117.62    8.43
  -4  -3  -3  115.37    8.69
  -4  -3  -3  125.78    8.84
  -4  -3  -3  124.58    9.19
  -4  -3  -3  129.36    8.68
  -4  -3  -3  125.44    8.90
  -4  -3  -3  131.88    9.03
  -4  -3  -3  121.87    8.97
  -4  -3  -3  122.98    9.39
  -4  -3  -3  129.88    8.91
  -4  -3  -3  135.50    8.78
   4   3   3  126.64    9.03
   4   3   3  139.01    8.76
   4   3   3  127.19    8.98
   4   3   3  127.46    8.96
   4   3   3  128.12    8.79
   4   3   3  137.56    8.56
   4   3   3  120.22    8.87
  -5  -3  -3   84.77    6.14
  -5  -3  -3   76.42    5.87
  -5  -3  -3   79.52    6.33
  -5  -3  -3   82.91    6.04
  -5  -3  -3   93.32    6.00
  -5  -3  -3   85.91    6.24
  -5  -3  -3   95.00    6.23
  -5  -3  -3   82.88    6.52
  -5  -3  -3   85.72    5.82
   5   3   3   85.20    6.04
   5   3   3   85.33    6.10
   5   3   3   87.96    6.18
   5   3   3   79.41    6.18
  -6   3   3   23.34    1.86
  -6   3   3   22.91    2.12
  -6   3   3   24.23    1.87
  -6   3   3   22.84    1.88
  -6   3   3   24.24    1.89
  -6   3   3   23.72    1.80
  -6   3   3   22.65    1.87
  -6   3   3   21.74    2.22
  -6   3   3   23.36    1.80
   6  -3  -3   22.43    1.84
   6  -3  -3   22.90    1.85
   7   3  -3   14.60    1.45
   7   3  -3   14.52    1.50
   7   3  -3   15.36    1.44
   7   3  -3   15.64    1.52
  -7  -3   3   16.67    1.67
  -7  -3   3   16.85    1.73
  -7  -3   3   15.73    1.28
  -8   3   3   57.37    4.16
  -8   3   3   58.70    4.86
  -8   3   3   56.69    3.93
  -8   3   3   59.37    4.15
   8   3  -3   51.68    4.24
   8   3  -3   49.35    4.21
   8   3  -3   45.23    4.10
  -8   3   3   60.04    4.19
   8   3  -3   50.58    4.09
   8  -3  -3   54.65    4.13
   8  -3  -3   54.70    4.12
  -8  -3   3   48.26    4.34
  -9   3   3   27.24    2.80
  -9   3   3   29.07    2.25
  -9   3   3   27.03    2.37
   9  -3  -3   23.73    2.29
   0   4  -3   82.44    5.48
   0   4  -3   76.74    5.27
   0  -4   3   79.42    5.33
   0  -4   3   74.13    5.45
   0  -4   3   80.28    5.38
   0   4  -3   72.72    6.10
   0   4  -3   73.70    5.09
   0  -4   3   76.80    5.32
   0   4  -3   76.94    5.35
   0  -4   3   83.83    5.39
   0  -4   3   77.66    5.39
   0   4  -3   74.98    5.34
   0  -4   3   76.77    5.56
   0   4  -3   73.25    5.28
   0  -4   3   73.00    5.17
   0  -4   3   82.98    5.38
   0   4  -3   77.60    5.09
   1   4  -3   50.31    3.36
   1   4  -3   49.11    3.46
   1   4  -3   50.54    3.54
   1   4  -3   51.02    3.49
   1   4  -3   48.92    3.52
   1   4  -3   51.87    3.37
   1   4  -3   48.53    3.47
  -1  -4   3   49.90    3.50
  -1  -4   3   48.64    3.59
  -1  -4   3   47.47    3.39
  -1  -4   3   50.42    3.52
  -1  -4   3   48.64    3.52
  -1  -4   3   48.60    3.53
  -1  -4   3   48.87    3.42
  -1  -4   3   51.29    3.50
  -2  -4  -3   91.49    6.29
  -2   4   3   83.38    7.25
  -2   4   3   90.86    6.27
  -2  -4  -3   95.64    6.08
  -2  -4  -3   96.00    6.32
  -2   4   3   93.01    7.24
  -2   4   3   90.71    6.27
  -2  -4  -3   89.95    6.45
  -2  -4  -3   88.72    6.42
  -2   4   3   90.98    6.20
  -2   4   3   92.39    5.97
  -2  -4  -3   92.20    6.41
  -2  -4  -3   89.35    6.48
  -2  -4  -3   85.53    6.22
  -2   4   3  102.52    6.43
   2  -4  -3   96.30    6.39
   2   4   3   86.12    6.10
   2   4   3   88.88    6.43
   2   4   3   90.13    6.33
   2  -4  -3   91.01    6.70
   2   4   3   89.79    6.42
   2   4   3   94.11    6.43
   2   4   3   87.94    6.35
   2   4   3   92.40    6.20
   2   4   3   93.31    6.24
   2   4   3   84.04    6.22
   3   4  -3   47.56    3.49
   3   4  -3   50.18    3.53
   3   4  -3   51.95    3.42
   3   4  -3   49.36    3.40
   3   4  -3   47.07    3.41
   3   4  -3   48.74    3.53
   3   4  -3   48.45    3.57
   3   4  -3   49.83    3.41
   3   4  -3   45.67    3.47
  -3  -4   3   46.13    3.63
  -3  -4   3   43.69    3.49
  -3  -4   3   52.86    3.59
  -3  -4   3   50.62    3.40
  -3  -4   3   47.36    3.43
  -3  -4   3   47.90    3.66
  -3  -4   3   46.94    3.55
  -3  -4   3   47.44    3.55
  -3  -4   3   50.87    3.40
  -3  -4   3   46.82    3.55
  -3  -4   3   50.06    3.47
  -3  -4   3   49.13    3.45
  -4  -4  -3   17.59    1.63
  -4  -4  -3   19.70    1.63
  -4  -4  -3   17.04    1.46
  -4  -4  -3   18.59    1.57
  -4  -4  -3   19.50    1.55
  -4  -4  -3   17.39    1.55
  -4  -4  -3   18.59    1.56
  -4  -4  -3   18.42    1.49
  -4  -4  -3   18.68    1.70
  -4  -4  -3   17.50    1.72
  -4  -4  -3   20.35    1.63
   4   4   3   18.34    1.64
   4   4   3   21.20    1.51
   4   4   3   18.36    1.59
   4   4   3   18.15    1.54
   4   4   3   16.26    1.48
   4   4   3   17.48    1.49
   5   4  -3   31.23    2.43
   5   4  -3   32.64    2.56
   5   4  -3   33.57    2.56
   5   4  -3   30.47    2.49
  -5  -4   3   33.41    2.72
  -5  -4   3   32.24    2.41
  -5  -4   3   32.89    2.69
  -5  -4   3   29.88    2.52
  -5  -4   3   33.75    2.59
  -5  -4   3   33.43    2.51
  -6  -4  -3    6.54    0.78
  -6  -4  -3    8.38    1.10
  -6  -4  -3    6.60    0.96
  -6  -4  -3    6.86    0.84
  -6  -4  -3    7.06    0.91
  -6  -4  -3    6.84    0.69
   6   4   3    6.54    0.89
   6   4   3    6.24    0.83
   6   4   3    6.99    0.83
   6   4   3    5.88    0.79
  -7  -4  -3   14.46    1.67
  -7  -4  -3   15.09    1.31
  -7  -4  -3   14.15    1.12
   7   4   3   12.12    1.37
   7   4   3   15.33    1.47
   7   4   3   15.46    1.46
   7   4   3   14.60    1.51
  -8  -4  -3    7.52    1.37
   8   4   3    7.85    1.06
   8   4   3    7.37    0.98
   8   4   3    8.70    1.17
   0  -5   3   65.13    4.61
   0  -5   3   67.35    4.61
   0  -5   3   69.35    4.61
   0  -5   3   65.21    4.79
   0  -5   3   70.38    4.61
   0   5  -3   67.52    5.18
   0   5  -3   63.54    4.53
   0   5  -3   63.46    4.60
   0  -5   3   68.06    4.56
   0   5  -3   63.50    5.27
   0  -5   3   62.29    4.43
   0   5  -3   68.19    4.71
   0  -5   3   64.17    4.68
   0   5  -3   65.35    4.38
   0   5  -3   66.02    4.61
   0   5  -3   64.30    4.52
  -1   5   3   42.38    2.67
  -1   5   3   41.21    2.62
  -1   5   3   39.87    3.14
   1  -5   3   34.20    2.65
  -1   5   3   39.17    2.60
  -1   5   3   40.29    2.66
   1  -5   3   35.68    2.78
  -1   5   3   41.83    2.54
   1  -5  -3   39.76    2.54
  -1   5  -3   32.27    2.60
  -1   5  -3   32.69    2.60
  -1   5  -3   32.19    2.55
  -1   5  -3   31.74    3.07
  -1   5  -3   31.75    2.47
  -1   5  -3   33.02    2.56
   1  -5  -3   39.11    2.61
   1  -5  -3   40.87    2.62
   1  -5  -3   40.56    2.63
  -2  -5  -3   95.12    6.84
  -2  -5  -3   94.70    6.65
  -2  -5  -3   97.84    6.83
  -2  -5  -3   97.71    6.71
  -2  -5  -3  106.28    6.50
  -2  -5  -3   91.51    6.86
  -2  -5  -3   96.68    6.91
   2   5   3   96.46    6.53
   2   5   3   95.16    6.74
   2   5   3   99.10    6.87
   2   5   3   96.16    6.82
   2   5   3   96.91    6.75
   2   5   3  100.13    6.83
   2   5   3   99.89    6.77
   2   5   3   93.72    7.76
   2   5   3   98.33    6.61
   2   5   3   88.97    6.57
   2   5   3   99.20    6.59
  -3  -5  -3   61.58    4.63
  -3  -5  -3   60.77    4.48
  -3  -5  -3   62.01    4.67
  -3  -5  -3   61.37    4.50
  -3  -5  -3   65.19    4.37
  -3  -5  -3   62.65    4.60
  -3  -5  -3   66.86    4.68
  -3  -5  -3   62.19    4.77
   3   5   3   59.47    4.58
   3   5   3   68.02    4.44
   3   5   3   65.01    4.59
   3   5   3   61.70    4.66
   3   5   3   63.13    4.53
   3   5   3   57.72    4.40
   3   5   3   68.56    4.60
   3   5   3   67.25    4.47
   4   5  -3   19.05    1.53
   4   5  -3   18.07    1.55
   4   5  -3   18.13    1.64
   4   5  -3   18.21    1.55
   4   5  -3   19.99    1.69
   4   5  -3   19.69    1.48
   4   5  -3   18.41    1.47
  -4  -5   3   18.54    1.61
  -4  -5   3   18.15    1.63
  -4  -5   3   19.85    1.57
  -4  -5   3   19.09    1.58
  -4  -5   3   17.30    1.57
  -4  -5   3   19.27    1.66
  -4  -5   3   18.55    1.58
  -4  -5   3   17.56    1.66
  -4  -5   3   18.67    1.51
  -5  -5  -3    8.34    0.98
  -5  -5  -3    8.26    1.05
  -5  -5  -3    8.03    0.85
  -5  -5  -3    8.75    1.01
  -5  -5  -3    8.90    0.96
  -5  -5  -3    8.60    1.09
  -5  -5  -3    9.10    0.97
   5   5   3    8.56    0.93
   5   5   3    8.13    0.87
   5   5   3    7.92    0.93
   5   5   3    8.74    0.89
  -6   5   3    5.43    0.53
  -6   5   3    5.84    0.90
   6   5  -3    3.70    0.66
  -6   5   3    4.72    0.56
  -6   5   3    5.58    0.60
  -6   5   3    5.53    0.59
   6   5  -3    4.06    0.65
  -6   5   3    6.65    0.91
  -6   5   3    5.16    0.54
  -6   5   3    5.19    0.59
   6   5  -3    3.80    0.67
  -6   5   3    5.27    0.56
  -6  -5   3    3.43    0.73
  -6  -5   3    4.06    0.73
  -6  -5   3    4.60    0.71
  -6  -5   3    3.97    0.57
   6  -5  -3    5.85    0.59
   6  -5  -3    5.41    0.57
  -6  -5   3    4.24    0.68
  -6  -5   3    5.07    0.80
  -6  -5   3    3.65    0.65
   7  -5   3    8.79    1.02
   7   5  -3   10.63    1.17
   7   5  -3   11.43    1.09
   7   5  -3   11.58    1.19
   7   5  -3   11.31    1.14
   7  -5   3    8.77    0.97
  -7   5  -3    8.44    0.91
  -7  -5   3   11.17    0.96
  -7   5  -3    8.86    1.42
  -7   5  -3   10.02    1.00
  -7  -5   3   12.15    1.13
  -7   5  -3    8.39    1.00
  -7   5  -3    9.14    0.97
  -7   5  -3    9.02    1.00
  -7  -5   3   11.12    1.33
  -8   5   3   11.29    1.08
  -8   5   3   10.68    1.46
   8  -5   3    8.24    1.04
  -8   5   3   11.50    1.12
  -8   5   3   10.97    1.06
  -8   5   3   10.90    1.01
  -8   5   3   10.29    1.01
   8  -5  -3   11.19    1.10
  -8   5  -3    8.28    1.49
   8  -5  -3   10.64    1.08
  -8   5  -3    7.97    1.08
  -1   6   3   56.05    3.62
  -1   6   3   56.61    4.32
  -1   6   3   56.74    3.50
   1  -6   3   46.18    3.84
  -1   6   3   57.70    3.69
  -1   6   3   55.69    3.63
   1  -6   3   45.57    3.68
  -1   6   3   57.61    3.69
  -1   6  -3   48.77    3.69
  -1   6  -3   45.50    3.56
   1  -6  -3   56.44    3.69
   1  -6  -3   55.59    3.54
  -1   6  -3   43.21    3.62
   1  -6  -3   54.71    3.65
  -1   6  -3   43.47    3.55
  -4  -6  -3  130.79    9.27
  -4  -6  -3  132.71    9.58
  -4  -6  -3  124.73    9.43
  -4  -6  -3  133.01    9.98
  -4  -6  -3  123.94    9.51
  -4  -6  -3  130.04    9.74
  -4  -6  -3  135.20    9.23
   4   6   3  130.15    9.47
  -4   6  -3  162.94   10.93
   4   6   3  140.51    9.48
   4   6   3  135.43    9.35
   4   6   3  124.04    9.14
  -5  -6  -3   33.53    2.87
  -5  -6  -3   32.39    2.77
  -5  -6  -3   29.72    2.65
  -5  -6  -3   33.38    2.82
  -5  -6  -3   29.23    2.78
  -5  -6  -3   29.58    2.92
  -5  -6  -3   32.72    3.05
   5  -6   3   40.58    2.61
  -5   6  -3   39.28    2.55
  -5   6  -3   38.83    2.58
   5   6   3   31.71    2.74
   5   6   3   28.89    2.59
   5   6   3   32.77    2.79
  -5   6  -3   41.48    2.55
  -5   6  -3   38.19    3.34
   5   6   3   30.27    2.67
  -5   6  -3   40.86    2.58
  -5   6  -3   40.83    3.04
  -5   6  -3   35.93    2.41
  -6   6   3   17.02    1.32
  -6   6   3   17.21    1.32
  -6   6   3   17.22    1.90
  -6   6   3   18.11    1.40
  -6   6   3   16.78    1.37
  -6   6   3   16.93    1.40
  -6   6   3   16.88    1.39
   6  -6  -3   18.11    1.41
   6  -6  -3   19.20    1.42
   7  -6   3    7.71    0.92
  -7  -6  -3    5.35    1.10
   7   6  -3    9.33    1.07
   7   6  -3    8.79    1.00
   7   6  -3    9.30    1.10
   7  -6   3    7.52    0.86
  -7   6  -3    8.78    0.89
  -7  -6   3    9.29    1.03
  -7   6  -3    8.25    0.87
  -7   6  -3    6.93    0.75
  -7   6  -3    7.45    0.87
  -7   6  -3    8.25    0.82
  -7   6  -3    7.89    1.31
  -7  -6   3   10.14    1.11
  -7  -6   3    9.77    1.26
  -8   6   3   10.36    1.00
  -8   6   3   11.54    1.52
  -8   6   3    9.60    0.96
  -8   6   3   11.05    1.09
  -8   6   3   10.36    0.94
   8  -6  -3    9.28    1.03
   2   7  -3   93.27    5.98
  -2  -7  -3   72.77    5.91
   2   7  -3   93.80    5.89
  -2  -7   3   88.84    5.75
   2   7   3   67.18    5.64
  -2  -7   3   89.73    5.96
   2   7   3   67.60    5.83
  -2  -7   3   89.10    5.96
  -3  -7  -3  157.04   10.79
  -3  -7  -3  156.81   10.46
  -3   7   3  126.77    9.83
  -3  -7  -3  158.29   10.68
  -3   7   3  125.28   11.89
  -3  -7  -3  154.37   10.74
  -3  -7  -3  157.85   10.39
  -3   7   3  127.52   10.32
  -3  -7  -3  153.82   10.94
   3   7   3  152.67   12.11
   3   7   3  162.27   10.60
   3   7   3  164.44   10.76
   3   7   3  161.98   10.41
  -3   7  -3  163.72   12.17
  -4  -7  -3   43.50    3.67
  -4  -7  -3   44.89    3.82
  -4  -7  -3   50.69    4.00
  -4  -7  -3   46.28    3.74
  -4  -7  -3   46.57    3.57
  -4  -7  -3   48.27    3.68
  -4  -7  -3   50.55    3.64
   4   7   3   48.41    3.36
   4   7   3   50.71    3.53
  -5  -7  -3   15.62    1.49
  -5  -7  -3   14.70    1.42
  -5  -7  -3   12.52    1.38
  -5  -7  -3   15.09    1.64
  -5  -7  -3   14.01    1.44
  -5  -7  -3   12.33    1.50
  -5  -7  -3   12.42    1.26
   5   7   3   13.65    1.17
   5   7   3   13.81    1.26
   6   7  -3   19.40    1.74
   6   7  -3   17.99    1.60
   6   7  -3   19.18    1.59
  -6  -7   3   18.26    1.79
  -6  -7   3   17.59    1.73
  -6  -7   3   19.99    1.94
  -6  -7   3   17.88    1.62
  -6  -7   3   19.13    1.96
  -6  -7   3   20.22    1.83
  -6  -7   3   19.55    1.86
   7   7  -3   12.50    1.27
  -7  -7   3   12.48    1.38
  -7  -7   3   14.26    1.65
  -7  -7   3   14.35    1.49
  -8   7   3   36.74    3.52
  -8   7   3   33.41    2.44
  -8   7   3   33.35    2.67
  -8   7   3   35.52    2.72
   0  -8   3   21.31    1.61
   0   8  -3   22.25    1.77
   0   8  -3   20.22    1.64
   0   8  -3   19.55    1.58
   0  -8   3   19.93    1.54
   0  -8   3   21.94    1.73
   0  -8   3   21.22    1.60
   0   8  -3   20.56    1.65
   0   8  -3   19.69    1.60
   0   8  -3   20.69    1.57
   1   8  -3   25.29    2.17
  -1  -8  -3   24.22    2.06
   1   8  -3   23.32    1.99
  -1  -8  -3   25.33    1.99
   1   8  -3   24.27    1.95
  -1   8   3   26.05    1.89
   1   8  -3   23.16    1.94
   1   8  -3   24.16    1.91
  -1  -8  -3   25.90    2.04
   1   8  -3   22.25    1.97
  -1   8   3   26.68    1.94
  -1   8   3   27.06    1.93
  -1   8   3   26.58    1.84
  -1   8   3   27.19    1.90
  -1  -8  -3   26.19    2.00
  -1  -8  -3   25.08    1.95
  -1   8   3   26.91    2.31
  -1  -8   3   21.91    1.97
  -1  -8   3   23.25    1.92
   1  -8  -3   28.12    1.93
   1  -8  -3   26.12    1.89
   1   8   3   27.16    1.99
  -1  -8   3   23.75    1.95
  -1  -8   3   22.27    1.93
   1   8   3   25.14    2.07
  -1  -8   3   20.98    1.86
   1   8   3   24.80    1.99
   1  -8  -3   25.83    1.84
   1   8   3   26.14    2.01
   1   8   3   25.53    2.38
  -2   8   3   69.12    4.91
  -2   8   3   68.63    5.16
  -2   8   3   71.18    5.17
  -2   8   3   70.60    5.11
  -2   8   3   73.99    6.02
  -2   8   3   68.44    5.10
   2   8  -3   81.76    5.43
   2  -8  -3   70.84    5.17
  -2  -8   3   80.70    5.41
  -2  -8   3   82.26    5.24
   2  -8  -3   70.52    4.99
  -2  -8   3   81.38    5.41
   2  -8  -3   69.82    5.16
  -2  -8   3   81.87    5.49
  -3  -8  -3   92.98    6.21
  -3  -8  -3   86.08    6.51
  -3   8   3   93.94    5.72
  -3   8   3   91.41    5.99
  -3   8   3   95.40    6.01
  -3  -8  -3   94.83    6.38
  -3  -8  -3   86.78    6.18
  -3   8   3   91.11    5.95
  -3   8   3   92.66    5.95
   3   8  -3   78.94    6.30
  -3  -8  -3   82.61    6.35
  -3  -8  -3   91.73    6.44
  -3   8   3   94.85    7.04
   3   8  -3   80.11    6.22
   3   8   3   92.32    7.25
  -3  -8   3   76.23    6.23
  -3  -8   3   81.70    6.47
  -3  -8   3   72.10    6.27
  -3  -8   3   80.44    6.11
  -3  -8   3   76.37    6.07
   3   8   3   96.53    6.49
  -3  -8   3   80.96    6.43
  -4   8   3   24.73    1.80
  -4   8   3   26.28    1.82
   5   8  -3   11.09    0.89
   5   8  -3   11.80    1.03
  -5  -8   3   12.61    1.32
  -5  -8   3   10.81    1.27
  -5  -8   3   10.36    1.21
  -5  -8   3   12.15    1.28
  -5  -8   3   10.99    1.35
  -5  -8   3   12.00    1.18
  -5  -8   3   10.80    1.24
  -6   8   3    4.98    0.51
  -6   8   3    4.55    0.48
  -6  -8  -3    2.66    0.81
  -6   8   3    4.34    0.91
   6   8   3    2.98    0.83
   0   9  -3    1.06    0.30
   0   9  -3    1.49    0.33
   0  -9   3    1.15    0.28
   0  -9   3    1.33    0.29
   0   9  -3    1.42    0.32
   0   9   3    1.24    0.34
   0   9   3    1.27    0.33
   0  -9  -3    1.05    0.29
   0  -9  -3    1.02    0.28
   0   9   3    1.10    0.29
   0   9  -3    1.48    0.32
   0   9   3    1.14    0.32
   0  -9   3    1.23    0.29
   0   9  -3    1.48    0.34
   0   9   3    1.06    0.31
   0  -9  -3    0.98    0.29
   0   9   3    1.30    0.50
  -1  -9  -3    2.11    0.43
  -1  -9  -3    2.14    0.41
  -1  -9  -3    2.70    0.45
  -1  -9  -3    2.27    0.45
   1   9   3    1.93    0.46
   1   9   3    2.06    0.43
   1   9   3    2.26    0.44
   1   9   3    2.81    0.50
   1   9   3    2.02    0.62
  -2  -9  -3    7.75    0.96
  -2  -9  -3    8.93    0.98
  -2   9   3    9.04    1.01
  -2   9   3    8.13    0.77
  -2   9   3    8.42    0.74
  -2   9   3    9.04    0.79
  -2   9   3    8.24    0.76
  -2  -9  -3    8.15    0.94
  -2   9   3    9.28    0.78
  -2  -9  -3    8.28    0.94
   2  -9  -3    8.61    0.73
   2   9   3    8.62    1.03
   2  -9  -3    9.41    0.79
   2   9   3    8.54    1.18
   2   9   3    8.72    0.99
   2  -9  -3    8.03    0.72
  -3   9   3   29.26    2.07
  -3   9   3   28.30    1.98
  -3   9   3   28.14    2.10
  -3   9   3   27.37    2.05
  -3   9   3   28.90    2.10
   3  -9  -3   27.37    2.01
  -3  -9   3   36.52    2.50
  -4   9  -3   21.92    2.30
  -6  -9  -3   -0.33    0.48
  -6  -9  -3    0.18    0.41
  -6  -9   3    1.72    0.62
  -6   9  -3    0.40    0.20
  -6  -9   3    1.48    0.61
  -6   9  -3    0.80    0.22
  -6  -9   3    1.76    0.58
  -6   9  -3    0.54    0.49
  -6  -9   3    1.50    0.53
  -7   9   3    6.32    0.66
   0  10   3    3.76    0.58
   0 -10  -3    4.01    0.58
   0  10   3    3.74    0.59
   0  10   3    3.73    0.59
   0 -10  -3    3.87    0.56
   0 -10  -3    3.55    0.54
   0  10   3    3.46    0.55
   0  10   3    4.19    0.78
   0  10   3    3.55    0.57
   1 -10   3    3.92    0.51
   1 -10   3    4.91    0.54
   1 -10   3    4.86    0.52
   1  10  -3    4.94    0.66
  -1  10   3    5.83    0.60
  -1  10   3    5.62    0.61
   1  10  -3    3.57    0.60
   1  10  -3    4.29    0.64
  -1 -10  -3    2.82    0.55
  -1  10   3    5.96    0.63
  -1 -10  -3    2.83    0.57
  -1  10   3    5.93    0.61
   1  10  -3    3.77    0.58
   1  10  -3    3.14    0.57
   1  10   3    3.30    0.83
   1  10   3    2.86    0.58
  -1  10  -3    4.38    0.55
  -1 -10   3    4.39    0.60
   1 -10  -3    5.58    0.58
  -1  10  -3    4.48    0.55
  -1 -10   3    3.82    0.56
  -1  10  -3    4.84    0.57
   1 -10  -3    5.66    0.59
   1  10   3    3.47    0.64
  -1 -10   3    3.87    0.57
  -1  10  -3    4.19    0.51
   2 -10   3   13.40    1.02
  -2  10   3   12.43    1.10
  -2  10   3   12.45    1.10
  -2  10   3   13.20    1.12
  -2  10   3   12.88    1.12
  -2  10   3   13.07    1.06
   2 -10  -3   12.52    1.07
  -2  10  -3   13.54    1.04
  -2  10  -3   13.71    1.07
  -2  10  -3   13.69    1.03
   2 -10  -3   13.28    1.12
  -2  10  -3   13.85    1.10
   2 -10  -3   13.01    1.10
   3  10  -3   72.82    5.04
   3  10  -3   74.06    5.53
  -3  10  -3   59.70    4.48
  -3 -10   3   64.05    4.93
  -3  10  -3   59.48    4.49
  -3 -10   3   69.62    4.92
  -3  10  -3   59.37    5.58
  -3 -10   3   65.33    4.96
  -4 -10  -3   19.71    1.95
  -4 -10  -3   20.13    1.92
  -4 -10  -3   18.24    1.88
   4  10   3   20.94    2.26
  -5 -10  -3    8.86    1.21
  -5 -10  -3   10.28    1.31
  -5  10  -3   12.04    1.56
  -5 -10   3   10.05    1.25
   5  10   3   10.83    1.58
  -5 -10   3   10.02    1.17
  -5 -10   3    9.16    1.26
  -5 -10   3    9.04    1.21
  -6  10   3    0.73    0.21
  -6  10   3    0.74    0.21
  -6 -10   3    0.16    0.40
  -6 -10   3    0.30    0.54
  -6  10  -3    0.17    0.15
  -6  10  -3   -0.06    0.48
  -6  10  -3    0.10    0.16
   1  11  -3   26.43    2.12
   1  11  -3   24.29    2.07
  -1 -11   3   23.82    2.04
  -1 -11   3   23.05    2.03
  -2  11   3   41.13    2.72
  -2  11   3   40.95    2.84
   2 -11   3   32.00    2.69
  -2  11   3   44.25    2.87
  -2  11   3   42.30    2.90
  -2  11   3   41.49    2.88
   2 -11  -3   42.20    2.91
  -2  11  -3   32.24    2.77
  -2  11  -3   31.06    2.78
   3  11  -3   46.35    3.69
  -3 -11   3   43.22    3.62
  -3 -11   3   47.03    3.65
  -3  11  -3   44.81    3.20
  -3  11  -3   43.65    3.18
  -3 -11   3   46.40    3.61
  -4 -11  -3   41.85    3.60
  -4 -11  -3   40.49    3.50
   4  11   3   45.19    4.14
   0 -12   3    4.59    0.67
   0 -12   3    4.12    0.64
   0  12  -3    5.24    0.67
   0  12  -3    4.57    0.69
   0  12  -3    5.50    0.73
  -1  12   3   13.56    1.36
   1  12  -3   16.78    1.47
  -1  12   3   13.11    1.31
  -1  12   3   12.91    1.26
  -1  12   3   14.13    1.33
   1  12  -3   18.16    1.55
  -1  12   3   13.57    1.35
   1 -12  -3   13.98    1.36
  -1 -12   3   18.14    1.50
   1 -12  -3   14.34    1.34
  -2  12   3   21.25    1.64
  -2  12   3   22.80    1.72
  -2  12   3   20.67    1.69
  -2 -12  -3   20.90    2.05
  -2 -12  -3   22.74    2.04
  -2  12   3   22.12    1.80
   2  12   3   22.40    2.15
  -3  12   3   29.74    2.06
  -3  12   3   29.49    2.04
  -3 -12  -3   30.37    2.50
  -3  12  -3   21.92    1.94
  -3  12  -3   21.88    1.94
  -4  12   3   15.69    1.29
  -4  12   3   15.87    1.27
   0 -13  -3    3.79    0.70
   0  13   3    3.39    0.68
   0  13  -3    3.17    0.62
   0 -13   3    3.00    0.60
   0 -13   3    2.65    0.57
   1  13  -3    5.73    0.88
  -1 -13   3    5.44    0.82
  -1 -13   3    4.64    0.81
  -2  13  -3    0.06    0.27
  -2  13  -3    0.06    0.25
   0   0  -4   12.43    1.02
   0   0   4   12.23    1.00
   0   0  -4   13.55    1.02
   0   0   4   12.91    1.05
   0   0  -4   12.94    1.00
   0   0   4   13.59    1.03
   0   0  -4   13.53    1.02
   0   0   4   13.40    1.01
   0   0   4   12.85    1.02
   0   0   4   14.35    1.03
   0   0   4   12.86    0.99
   0   0  -4   11.98    0.99
   0   0  -4   13.68    1.00
   0   0   4   13.57    1.18
   0   0  -4   14.43    1.02
   0   0   4   14.64    1.00
   0   0   4   13.33    1.03
   0   0  -4   13.64    1.17
   0   0   4   12.84    1.02
   0   0  -4   13.51    0.97
   0   0   4   14.00    0.98
   0   0  -4   13.05    1.02
   0   0   4   13.18    1.04
   0   0  -4   13.30    1.06
   0   0  -4   12.56    0.98
  -1   0   4   31.33    2.12
  -1   0   4   28.69    2.05
  -1   0   4   28.75    2.17
  -1   0   4   29.27    2.43
   1   0  -4   30.15    2.08
   1   0  -4   30.87    2.19
   1   0  -4   31.20    2.22
  -1   0   4   28.91    2.12
   1   0  -4   31.25    2.10
   1   0  -4   29.45    2.13
   1   0  -4   29.37    2.12
  -1   0   4   29.90    2.08
  -1   0   4   30.77    2.13
   1   0  -4   29.80    2.13
   1   0  -4   28.17    2.05
  -1   0   4   29.28    2.08
   1   0  -4   30.39    2.15
  -1   0   4   29.68    2.11
   1   0  -4   29.87    2.08
   1   0  -4   29.55    2.13
  -1   0   4   29.72    2.13
   1   0  -4   28.68    2.13
   1   0  -4   29.77    2.09
  -1   0   4   30.68    2.02
  -1   0   4   28.80    2.06
   1   0  -4   29.54    2.15
   1   0  -4   30.94    2.44
   3   0   4   13.43    1.02
   3   0   4   12.54    0.99
   3   0   4   12.08    1.01
  -3   0   4   10.96    0.95
  -3   0  -4   11.11    0.81
   3   0  -4   11.26    0.95
  -3   0   4   10.96    0.93
  -3   0  -4   12.52    0.93
   3   0   4   12.42    0.96
  -3   0  -4   12.39    0.95
   3   0  -4   10.73    0.93
  -3   0  -4   12.38    0.88
  -3   0   4   11.41    0.91
  -3   0  -4   12.03    1.09
  -3   0   4   11.35    0.86
   3   0  -4   10.83    0.92
   3   0  -4   11.32    0.94
   3   0  -4   11.11    0.88
  -3   0   4   10.62    0.90
   3   0  -4   11.14    0.89
  -3   0  -4   13.14    1.01
   3   0  -4   10.83    1.01
  -3   0  -4   12.41    1.01
  -3   0   4   10.07    0.81
   3   0  -4   10.84    0.90
  -3   0   4   11.36    0.91
  -3   0   4   10.70    1.01
  -3   0  -4   12.04    0.94
  -3   0   4   11.10    0.81
  -3   0  -4   12.93    0.88
   3   0   4   11.81    0.96
  -3   0   4   11.17    0.86
   3   0  -4   11.65    0.93
  -3   0   4   10.71    0.91
  -3   0   4   10.72    0.91
  -3   0   4   10.29    0.94
  -3   0   4   10.56    1.00
  -3   0  -4   12.08    0.94
  -3   0  -4   11.81    0.99
  -3   0   4   11.16    0.88
   3   0  -4   10.67    0.93
  -3   0   4   10.42    0.96
  -3   0  -4   11.40    0.81
   3   0   4   12.49    0.97
  -4   0   4   80.08    5.50
  -4   0   4   73.59    5.53
  -4   0   4   77.32    6.26
  -4   0   4   77.06    5.46
   4   0  -4   84.76    5.88
   4   0  -4   81.91    5.43
   4   0  -4   82.40    5.38
  -4   0   4   73.36    5.27
  -4   0   4   77.70    5.28
  -4   0   4   83.43    5.50
   4   0  -4   77.74    5.51
  -4   0   4   73.81    5.81
   4   0  -4   75.80    5.56
   4   0  -4   74.83    5.55
  -4   0   4   74.34    5.64
  -4   0   4   81.58    5.32
  -4   0   4   78.20    5.46
   4   0  -4   76.28    5.49
  -4   0   4   82.82    5.57
  -6   0   4   35.12    2.71
   6   0  -4   32.03    2.77
  -6   0   4   36.64    2.79
  -6   0   4   38.55    2.90
   6   0  -4   34.46    2.79
  -6   0   4   37.68    2.73
   6   0  -4   40.03    2.77
  -6   0   4   33.35    3.00
  -6   0   4   36.49    3.16
  -6   0   4   34.19    2.86
   6   0  -4   36.41    2.76
   6   0  -4   39.11    2.75
  -6   0   4   36.11    2.85
   7   0  -4    5.16    0.72
  -7   0   4    5.80    0.78
   7   0  -4    5.19    0.72
   7   0  -4    5.25    0.72
  -7   0   4    6.13    0.79
  -7   0   4    6.02    0.80
  -7   0   4    5.61    0.84
  -7   0   4    5.70    0.87
  -7   0   4    4.96    0.78
   9   0  -4   18.81    1.87
   9   0  -4   19.51    1.87
   1   1  -4  344.72   23.14
   1   1  -4  338.72   23.37
   1   1  -4  325.62   23.67
   1   1  -4  368.84   23.68
   1   1  -4  324.18   22.74
   1   1  -4  327.46   23.36
   1   1  -4  347.47   23.66
   1   1  -4  332.29   22.25
   1   1  -4  357.10   26.62
   1   1  -4  340.46   23.15
   1   1  -4  357.46   23.17
   1   1  -4  351.92   23.48
   1   1  -4  344.03   24.56
   1   1  -4  343.32   23.68
   1   1  -4  329.76   23.14
   1   1  -4  354.23   23.91
  -1  -1   4  367.65   23.67
  -1  -1   4  337.10   23.91
  -1  -1   4  341.90   23.68
  -1  -1   4  340.68   23.37
  -1  -1   4  325.96   23.14
  -1  -1   4  347.03   23.69
  -1  -1   4  319.23   23.14
  -1  -1   4  381.03   23.68
  -1  -1   4  366.04   23.17
  -1  -1   4  349.12   23.15
  -1  -1   4  360.22   22.26
  -1  -1   4  321.29   23.47
  -1  -1   4  333.21   26.64
  -1  -1   4  345.49   23.37
   2   1  -4  243.58   16.71
   2   1  -4  245.35   15.82
   2   1  -4  230.84   15.79
   2   1  -4  228.31   16.17
   2   1  -4  237.65   15.97
   2   1  -4  237.31   16.03
   2   1  -4  229.11   15.97
   2   1  -4  243.82   16.17
   2   1  -4  245.25   18.21
   2   1  -4  230.85   15.78
  -2  -1   4  222.46   15.78
  -2  -1   4  228.62   16.16
  -2  -1   4  241.81   15.79
  -2  -1   4  238.56   15.98
  -2  -1   4  232.20   16.17
  -2  -1   4  219.88   16.33
  -2  -1   4  228.54   18.25
  -2  -1   4  232.89   15.81
  -2  -1   4  231.99   15.55
  -2  -1   4  234.88   16.02
  -2  -1   4  231.98   16.70
  -2  -1   4  236.13   15.21
   3  -1   4   38.44    3.22
  -3   1   4   47.30    3.30
  -3   1   4   47.71    3.75
  -3   1   4   49.18    3.15
  -3   1   4   50.40    3.15
   3  -1   4   39.29    3.50
   3  -1   4   41.28    3.30
  -3   1   4   47.66    3.24
  -3   1   4   49.30    3.31
  -3   1   4   49.61    3.38
  -3   1   4   45.89    3.49
   3  -1   4   42.83    3.37
  -3   1   4   49.94    3.25
   3  -1   4   37.78    3.28
   3  -1  -4   52.35    3.21
  -3   1  -4   40.85    3.31
  -3   1  -4   42.01    3.40
  -3   1  -4   37.56    3.22
   3  -1  -4   52.81    3.33
   3  -1  -4   48.61    3.31
   3  -1  -4   51.74    3.28
   3  -1  -4   51.86    3.20
   3  -1  -4   51.09    3.21
   3  -1  -4   49.14    3.31
   3  -1  -4   51.17    3.28
  -3   1  -4   37.88    3.26
   3  -1  -4   51.38    3.54
  -3   1  -4   38.21    3.13
  -4  -1  -4   51.41    4.03
  -4  -1  -4   56.05    3.75
  -4   1   4   49.17    3.64
  -4  -1  -4   53.21    3.75
  -4   1   4   46.49    3.67
  -4  -1  -4   50.07    3.53
  -4   1   4   45.48    3.74
  -4  -1  -4   54.25    3.84
  -4   1   4   47.25    3.69
  -4   1   4   46.50    4.18
  -4  -1  -4   56.81    3.61
  -4  -1  -4   54.19    3.67
  -4  -1  -4   56.55    3.77
  -4  -1  -4   53.37    3.56
  -4   1   4   47.99    3.51
  -4   1   4   46.83    3.91
  -4  -1  -4   54.48    3.69
  -4   1   4   45.57    3.50
  -4   1   4   49.00    3.63
   4  -1  -4   52.79    3.60
   4   1   4   55.94    3.76
   4   1   4   51.22    3.77
   4  -1  -4   47.84    3.68
   4   1   4   52.23    3.72
   4  -1  -4   51.55    3.66
   4   1   4   55.39    3.81
   4  -1  -4   50.10    3.57
   4  -1  -4   48.26    3.69
   4  -1  -4   50.75    3.95
   4   1   4   52.92    3.82
   4   1   4   60.68    3.77
   4  -1  -4   51.03    3.65
  -5   1   4   55.04    4.30
  -5   1   4   58.89    4.18
  -5   1   4   55.71    4.51
  -5   1   4   57.80    4.82
  -5   1   4   56.50    4.05
  -5   1   4   61.87    4.29
  -5   1   4   60.20    4.05
  -5   1   4   59.22    4.19
  -5   1   4   55.34    4.23
   5  -1  -4   64.24    4.15
   5  -1  -4   55.21    4.23
   5  -1  -4   60.83    4.11
   5  -1  -4   59.50    4.19
   5  -1  -4   56.36    4.23
   6   1  -4   25.18    2.16
  -6   1   4   27.84    2.14
  -6   1   4   27.12    2.08
   6   1  -4   27.88    2.12
  -6   1   4   25.90    2.17
   6   1  -4   27.33    2.16
  -6   1   4   26.44    2.45
  -6   1   4   28.36    2.22
  -6   1   4   25.74    2.19
  -6   1   4   26.80    2.37
  -6   1   4   26.94    2.09
  -6   1   4   27.61    2.16
   6   1  -4   25.13    2.16
  -6  -1   4   24.89    2.22
   6  -1  -4   27.49    2.12
  -6  -1   4   28.08    2.43
  -6  -1   4   26.43    2.23
   6  -1  -4   23.95    2.11
   6  -1  -4   26.22    2.13
  -6  -1   4   27.85    2.14
  -6  -1   4   28.47    2.40
  -7  -1  -4    7.58    1.11
   7   1  -4    9.47    1.02
   7   1  -4   10.42    1.03
   7   1  -4    9.85    1.04
  -7  -1  -4    8.24    1.34
   7   1  -4    9.67    1.05
   7   1   4    8.14    1.04
  -7  -1   4   10.19    1.23
  -7  -1   4    9.87    1.11
  -7  -1   4   10.68    1.15
  -7  -1   4   10.62    1.10
  -7  -1   4   11.18    1.20
   7   1   4    7.69    1.02
   7   1   4    8.87    1.14
   0   2   4  910.71   58.88
   0   2   4  899.77   59.90
   0  -2  -4  872.61   61.27
   0   2   4  968.70   61.23
   0   2   4  851.88   61.25
   0   2   4  837.16   60.42
   0   2   4  941.02   60.70
   0   2   4  861.84   68.90
   0   2   4  864.03   60.05
   0  -2  -4  903.81   60.72
   0  -2  -4  955.42   60.45
   0  -2  -4  843.05   59.89
   0   2   4  806.47   60.75
   0  -2  -4  923.83   59.88
   0  -2  -4  917.03   59.90
   0  -2  -4  942.24   61.81
   0  -2  -4  887.10   58.89
   0   2   4  848.63   61.25
   0   2   4  856.33   60.00
   0   2   4  891.80   57.55
   0  -2  -4  859.45   60.40
   0   2   4  819.54   59.89
   0  -2  -4  897.12   68.84
   0   2   4  950.70   61.88
   0   2   4  900.38   61.21
   0  -2  -4  903.00   61.27
   0   2   4  901.00   60.43
   0  -2  -4  861.29   57.53
   0  -2  -4 1000.00   61.24
  -1  -2  -4  158.47   11.01
  -1  -2  -4  162.40   10.92
  -1  -2  -4  171.09   11.09
  -1  -2  -4  160.28   11.18
  -1  -2  -4  161.08   11.15
  -1  -2  -4  164.71   10.90
  -1  -2  -4  154.48   10.74
  -1  -2  -4  167.88   10.91
   1   2   4  147.33   10.88
   1   2   4  147.96   12.55
   1   2   4  163.57   11.31
   1   2   4  157.57   11.15
   1   2   4  163.32   10.89
   1   2   4  155.82   11.05
   1   2   4  164.23   10.92
   1   2   4  164.79   10.51
   1   2   4  169.43   11.06
   1   2   4  168.59   10.75
   1   2   4  151.13   11.14
   2   2  -4  609.35   38.96
   2   2  -4  618.30   37.92
   2   2  -4  605.02   39.47
   2   2  -4  638.63   40.78
   2   2  -4  616.49   38.59
   2   2  -4  636.93   38.98
  -2   2   4  495.18   37.04
   2   2  -4  599.81   39.12
   2   2  -4  632.89   38.57
   2   2  -4  600.46   39.46
   2   2  -4  616.01   38.61
   2  -2  -4  513.54   39.13
  -2  -2   4  624.02   38.60
  -2  -2   4  589.51   37.94
  -2  -2   4  621.34   38.97
   2  -2  -4  489.49   44.33
  -2  -2   4  605.54   39.14
  -2  -2   4  637.28   38.58
   2  -2  -4  476.85   37.02
   2  -2  -4  480.80   37.87
   2  -2  -4  522.72   39.40
   2  -2  -4  488.76   39.44
  -2  -2   4  612.82   39.48
  -2  -2   4  585.24   39.86
  -2  -2   4  618.54   40.80
   2  -2  -4  492.51   38.88
  -2  -2   4  601.56   38.58
  -2  -2   4  607.56   39.48
  -2  -2   4  616.39   37.10
   2  -2  -4  475.38   39.41
   2  -2  -4  474.45   39.76
   2  -2  -4  500.23   39.41
  -2  -2   4  647.45   38.99
  -3   2   4   80.12    6.70
   3  -2   4   84.08    5.73
   3  -2   4   80.66    5.82
  -3   2   4   81.82    5.55
  -3   2   4   82.74    5.84
   3  -2   4   81.73    5.74
  -3   2   4   85.00    5.78
  -3   2   4   83.58    5.77
  -3   2   4   86.81    6.22
   3  -2   4   83.70    5.89
   3  -2   4   86.44    5.95
   3  -2   4   79.35    5.94
  -3   2   4   82.05    5.84
   3  -2   4   84.47    6.22
   3  -2   4   79.88    5.90
  -3   2   4   85.37    5.98
   3  -2  -4   87.68    5.67
  -3   2  -4   83.86    6.01
   3  -2  -4   92.65    5.72
   3  -2  -4   93.06    5.89
   3  -2  -4   91.41    6.26
   3  -2  -4   91.42    5.72
   3  -2  -4   89.28    5.82
  -3   2  -4   75.00    6.81
  -3   2  -4   83.12    5.87
   3  -2  -4   90.13    5.83
  -3   2  -4   81.09    5.59
  -3   2  -4   78.90    5.77
   3  -2  -4   85.26    5.89
   3  -2  -4   87.14    5.90
  -3   2  -4   75.65    6.21
   3  -2  -4   85.60    5.88
  -3   2  -4   78.38    5.81
  -4   2   4   73.02    5.21
  -4   2   4   70.21    5.27
  -4   2   4   73.24    5.02
  -4   2   4   71.23    5.28
  -4   2   4   70.16    5.62
  -4   2   4   76.03    5.22
  -4   2   4   75.69    5.40
  -4   2   4   70.21    6.05
  -4   2   4   68.63    5.02
   4  -2  -4   77.71    5.26
   4  -2  -4   75.50    5.31
   4  -2  -4   81.49    5.16
   4  -2  -4   81.92    5.34
   4  -2  -4   78.48    5.68
   4  -2  -4   79.83    5.31
   4  -2  -4   74.63    5.31
   4  -2  -4   78.99    5.13
   5  -2   4  115.84    7.88
   5  -2   4  120.31    7.77
   5  -2   4  114.05    8.03
   5  -2   4  108.85    7.95
  -5   2  -4  103.30    8.39
  -5   2  -4  112.53    7.79
  -5   2  -4  113.95    8.12
  -5   2  -4  112.95    7.52
  -5   2  -4  106.74    9.21
  -5   2  -4  109.35    7.85
  -5   2  -4  107.16    7.93
  -5   2  -4  124.10    7.94
   6   2  -4   69.33    5.17
   6   2  -4   70.64    5.23
   6   2  -4   68.99    5.07
   6   2  -4   66.72    5.21
  -6  -2   4   70.96    5.00
  -6  -2   4   67.64    4.83
  -6  -2   4   76.68    5.17
  -6  -2   4   65.13    5.33
  -6  -2   4   70.96    5.27
  -6  -2   4   74.75    5.17
  -6  -2   4   73.79    5.83
  -6  -2   4   71.98    5.52
  -6  -2   4   75.63    5.05
  -7   2   4   88.10    6.41
  -7   2   4   92.31    5.93
   7   2  -4   69.64    5.91
  -7   2   4   90.45    5.70
   7   2  -4   66.47    5.95
  -7   2   4   85.77    5.96
   7   2  -4   68.79    5.97
  -7   2   4   89.95    6.06
  -7   2   4   88.59    6.83
   7   2  -4   70.28    5.81
  -7  -2   4   74.35    6.67
   7  -2  -4   87.35    5.97
   7  -2  -4   83.27    5.95
  -7  -2   4   74.31    6.34
   7  -2  -4   94.41    5.94
   9   2  -4   20.81    1.91
   9   2  -4   20.27    1.84
  -9   2   4   16.75    1.64
  -9   2   4   16.57    1.75
   9  -2  -4   15.11    1.67
   1   3  -4  169.81   11.32
   1   3  -4  164.64   11.32
   1   3  -4  154.09   11.19
   1   3  -4  169.42   11.43
   1   3  -4  174.65   12.86
   1   3  -4  160.10   11.31
   1   3  -4  174.08   11.42
   1   3  -4  159.95   10.78
   1   3  -4  151.94   11.16
   1   3  -4  167.39   11.31
   1   3  -4  162.24   11.43
   1   3  -4  164.34   11.15
   1   3  -4  164.53   11.19
   1   3  -4  171.52   11.59
   1   3  -4  156.40   10.98
  -1  -3   4  160.15   11.57
  -1  -3   4  159.98   11.30
  -1  -3   4  163.17   11.91
  -1  -3   4  173.22   11.44
  -1  -3   4  160.15   11.44
  -1  -3   4  172.09   11.18
  -1  -3   4  163.29   11.44
  -1  -3   4  179.99   12.87
  -1  -3   4  179.20   11.45
  -1  -3   4  151.88   10.99
  -1  -3   4  159.48   11.34
  -1  -3   4  172.87   11.18
  -1  -3   4  165.42   10.78
  -1  -3   4  166.16   11.32
  -1  -3   4  164.23   10.75
  -3   3   4   99.88    7.89
   3   3  -4  129.11    8.03
  -3   3   4   99.36    8.15
  -3   3   4   99.94    7.59
  -3   3   4   96.71    9.18
   3   3  -4  131.31    8.18
   3   3  -4  124.91    8.18
   3   3  -4  129.74    8.10
   3   3  -4  130.37    7.97
  -3  -3   4  119.97    7.94
   3  -3  -4   99.83    8.47
   3  -3  -4  107.71    8.06
  -3  -3   4  135.40    8.02
   3  -3  -4  103.52    7.74
   3  -3  -4  103.92    8.03
  -3  -3   4  133.58    8.15
  -3  -3   4  122.36    8.18
   3  -3  -4  104.75    8.04
  -3  -3   4  117.78    8.17
   3  -3  -4  105.85    8.06
  -3  -3   4  130.07    8.45
  -3  -3   4  125.60    8.12
  -3  -3   4  126.14    7.89
  -4  -3  -4   80.58    6.48
  -4  -3  -4   83.03    6.15
  -4  -3  -4   84.10    6.10
  -4  -3  -4   76.94    5.93
  -4  -3  -4   91.52    6.17
  -4  -3  -4   85.75    5.83
  -4  -3  -4   90.31    6.00
  -4  -3  -4   91.77    6.23
  -4  -3  -4   86.11    5.97
  -4  -3  -4   84.56    6.20
   4   3   4   99.12    6.02
   4   3   4   77.06    6.05
   4   3   4   86.11    6.03
   4   3   4   83.79    6.22
   4   3   4   85.12    6.18
   4   3   4   83.25    6.13
   5  -3   4  171.22   10.13
   5   3  -4  127.94   10.06
   5  -3   4  165.84   10.03
   5   3  -4  129.74    9.97
   5   3  -4  127.63   10.06
   5   3  -4  128.84    9.80
  -5  -3   4  131.27   10.45
  -5  -3   4  129.11   10.26
  -5  -3   4  133.39    9.95
  -5  -3   4  138.48   11.25
  -5  -3   4  136.64   10.07
  -5  -3   4  143.22    9.58
  -5  -3   4  128.73    9.69
  -5  -3   4  136.50   10.08
  -5   3  -4  160.11   11.64
  -5   3  -4  161.57   10.00
  -5  -3   4  133.89   10.03
  -5   3  -4  161.26   10.64
  -5   3  -4  170.59    9.93
  -5  -3   4  141.74   10.07
   6  -3   4   41.24    3.27
   6  -3   4   41.14    3.19
  -6   3  -4   41.89    3.29
  -6   3  -4   40.92    3.24
  -6   3  -4   38.30    3.86
  -6   3  -4   48.16    3.27
  -6   3  -4   40.07    3.19
  -6   3  -4   43.06    3.07
  -6   3  -4   43.65    3.60
  -6   3  -4   44.52    3.17
   7   3  -4   29.64    2.21
   7  -3   4   20.20    2.07
   7   3  -4   28.64    2.19
   7   3  -4   30.53    2.13
   7   3  -4   28.45    2.16
   7  -3   4   20.66    2.00
  -7   3  -4   20.50    2.54
  -7   3  -4   21.87    2.09
  -7   3  -4   22.64    2.08
  -7   3  -4   22.04    1.95
  -7  -3   4   28.41    2.32
  -7   3  -4   22.62    2.12
   8   3  -4   27.20    2.43
   8   3  -4   29.54    2.53
   8   3  -4   29.17    2.52
  -8  -3   4   29.08    2.65
   9   3  -4   13.39    1.41
   9   3  -4   11.89    1.32
  -9   3   4   11.09    1.20
  -9   3   4   10.41    1.50
   9  -3  -4    8.92    1.18
  -1  -4  -4  187.61   14.41
  -1   4   4  221.17   14.61
   1   4  -4  238.85   14.81
  -1   4   4  220.49   16.91
  -1  -4  -4  183.74   14.61
  -1  -4  -4  192.38   14.99
   1   4  -4  229.00   14.79
  -1  -4  -4  195.99   14.06
  -1   4   4  229.81   14.77
  -1  -4  -4  202.61   14.85
   1   4  -4  244.62   14.94
  -1   4   4  229.25   14.77
  -1  -4  -4  209.99   14.64
   1   4  -4  241.15   14.11
  -1  -4  -4  193.59   14.97
   1   4  -4  230.12   14.65
  -1  -4  -4  195.12   14.80
  -1   4   4  225.46   14.06
  -1   4   4  233.48   15.12
   1   4  -4  233.86   14.64
   1  -4  -4  241.20   14.92
   1   4   4  203.77   14.76
   1   4   4  192.41   14.78
   1  -4  -4  237.96   14.80
   1  -4  -4  241.12   14.94
   1   4   4  186.24   16.88
   1  -4  -4  221.60   15.11
   1   4   4  204.67   14.11
   1   4   4  184.41   14.56
   1   4   4  197.20   14.93
  -1  -4   4  228.08   15.12
  -1  -4   4  236.13   14.96
  -1  -4   4  245.56   14.78
   1   4   4  195.68   14.36
   1   4   4  181.22   14.56
   1   4   4  188.12   14.80
   1   4   4  193.78   14.65
   1  -4  -4  228.74   14.37
   1   4   4  209.94   14.97
   1  -4  -4  229.91   14.90
  -1  -4   4  238.84   14.97
  -1  -4   4  228.03   14.38
  -1  -4   4  244.07   14.84
   1   4   4  204.66   14.67
   1   4   4  217.61   14.83
   1  -4  -4  225.54   14.92
   2   4  -4  107.06    7.12
   2   4  -4   97.81    7.02
   2   4  -4   94.98    7.10
   2   4  -4  100.50    7.21
   2   4  -4   97.90    7.19
   2   4  -4  109.42    6.88
   2   4  -4  103.07    7.22
   2   4  -4  108.49    7.24
   2   4  -4  103.87    7.14
  -2  -4   4  100.02    7.36
  -2  -4   4  103.60    8.05
  -2  -4   4  108.41    7.08
  -2  -4   4  102.24    7.27
  -2  -4   4  110.69    6.88
  -2  -4   4  105.77    7.45
  -2  -4   4  100.42    7.26
  -2  -4   4  104.89    7.08
  -2  -4   4  103.89    7.20
  -2  -4   4   98.67    6.98
  -2  -4   4  103.71    7.19
  -3   4   4   25.60    1.94
  -3   4   4   25.61    1.94
  -3   4   4   26.56    1.85
  -3   4   4   26.43    1.91
  -3   4   4   25.00    2.35
  -3   4   4   25.95    1.90
  -3   4   4   25.78    2.34
  -3   4   4   27.24    1.99
   3  -4  -4   27.25    2.23
   3  -4  -4   27.34    1.85
   3  -4  -4   27.35    1.90
   3  -4  -4   29.72    1.92
   3  -4  -4   28.46    1.91
  -4  -4  -4   17.73    1.45
  -4  -4  -4   16.11    1.48
  -4  -4  -4   16.99    1.53
  -4  -4  -4   16.91    1.49
  -4  -4  -4   17.58    1.64
  -4  -4  -4   16.49    1.65
  -4  -4  -4   17.81    1.49
  -4  -4  -4   18.59    1.61
  -4  -4  -4   16.85    1.40
  -4  -4  -4   18.25    1.48
   4   4   4   16.42    1.50
   4   4   4   16.07    1.45
   4   4   4   17.11    1.43
   4   4   4   17.79    1.59
   4   4   4   19.26    1.43
   4   4   4   15.31    1.41
   5  -4   4   45.68    3.93
  -5  -4  -4   50.02    3.88
  -5  -4  -4   50.34    4.00
  -5  -4  -4   55.35    4.00
   5   4  -4   59.96    4.01
  -5  -4  -4   48.10    4.22
  -5  -4  -4   50.90    4.05
  -5  -4  -4   56.85    4.15
   5   4  -4   62.51    4.08
   5   4  -4   59.42    4.06
   5   4  -4   58.68    3.90
  -5  -4  -4   51.91    4.37
  -5  -4   4   60.88    4.07
   5   4   4   51.05    4.11
  -5   4  -4   43.86    4.19
  -5   4  -4   47.11    3.80
  -5  -4   4   61.07    4.25
  -5  -4   4   59.03    3.88
  -5  -4   4   59.53    3.94
   5   4   4   46.36    3.95
  -5   4  -4   46.50    3.86
  -5  -4   4   63.44    4.28
   5   4   4   51.21    3.95
   5   4   4   50.68    4.03
  -5   4  -4   47.17    3.94
  -5  -4   4   61.12    4.03
  -5  -4   4   60.37    4.14
  -6   4   4   30.88    2.52
  -6  -4  -4   42.03    3.08
  -6   4   4   31.52    2.42
  -6   4   4   33.30    2.58
  -6   4   4   31.70    2.56
  -6   4   4   31.62    2.91
  -6   4   4   30.16    3.04
  -6   4   4   32.19    2.45
  -6   4   4   30.51    2.51
  -6   4   4   29.16    2.52
  -6  -4  -4   38.07    2.53
   6   4   4   37.68    2.72
   6   4   4   42.15    2.94
   6  -4  -4   32.70    2.55
   6   4   4   40.17    2.81
   6  -4  -4   32.66    2.55
  -7   4   4   15.92    1.39
  -7   4   4   18.44    1.53
  -7   4   4   17.43    1.46
  -7   4   4   16.48    1.42
  -7   4   4   15.43    1.45
  -7   4   4   17.47    1.51
  -7   4   4   17.87    1.50
  -7   4   4   16.69    1.84
   7  -4  -4   16.23    1.46
   7  -4  -4   15.96    1.45
  -1  -5  -4   78.43    5.52
  -1  -5  -4   84.86    5.34
  -1  -5  -4   78.12    5.48
  -1  -5  -4   80.98    5.67
   1   5  -4   67.29    5.70
  -1  -5  -4   86.80    5.65
  -1  -5  -4   82.66    5.64
  -1  -5  -4   80.98    5.70
   1   5   4   82.20    5.39
   1   5   4   82.24    5.58
   1   5   4   84.73    5.59
   1   5   4   78.63    5.64
   1   5   4   83.05    5.59
  -1  -5   4   67.53    5.60
   1   5   4   81.53    6.47
   1   5   4   82.15    5.39
   1   5   4   85.80    5.66
   1   5   4   76.94    5.55
  -1  -5   4   70.83    5.61
  -2  -5  -4   38.58    3.02
  -2   5   4   40.26    2.89
  -2  -5  -4   40.69    3.03
  -2   5   4   44.22    2.92
  -2  -5  -4   41.58    3.15
  -2  -5  -4   39.94    3.11
  -2  -5  -4   40.49    3.15
  -2   5   4   41.72    2.83
  -2   5   4   46.51    3.04
  -2  -5  -4   44.03    2.96
  -2   5   4   39.06    2.95
  -2   5   4   43.15    3.51
  -2   5   4   40.77    2.97
  -2  -5  -4   41.65    3.11
   2  -5  -4   45.94    2.94
   2   5   4   37.90    2.90
   2   5   4   40.05    3.02
   2  -5  -4   43.34    2.83
   2   5   4   42.24    3.17
   2   5   4   39.59    2.99
   2   5   4   46.12    3.12
   2  -5  -4   42.68    3.30
   2   5   4   39.02    3.05
   2  -5  -4   43.64    2.93
   2   5   4   40.13    3.56
   2   5   4   43.22    2.94
   2  -5  -4   42.13    2.84
   3   5  -4   62.99    4.01
   3   5  -4   58.52    4.05
   3   5  -4   55.14    4.15
   3   5  -4   58.70    4.11
   3   5  -4   59.01    4.11
   3   5  -4   53.80    3.94
   3   5  -4   53.81    4.07
  -3  -5   4   54.88    4.11
  -3  -5   4   58.62    4.16
  -3  -5   4   58.98    3.97
  -3  -5   4   54.56    4.16
  -3  -5   4   55.76    4.24
  -3  -5   4   58.57    4.04
  -3  -5   4   56.26    4.02
  -3  -5   4   53.10    4.14
  -3  -5   4   56.38    4.26
  -4  -5  -4   37.19    2.98
  -4  -5  -4   38.94    2.94
  -4  -5  -4   38.07    3.14
  -4  -5  -4   38.88    3.03
  -4  -5  -4   38.74    3.23
  -4  -5  -4   39.44    3.00
  -4  -5  -4   39.29    2.88
   4   5   4   36.05    2.82
   4   5   4   37.83    2.97
   4   5   4   38.98    2.91
   4   5   4   38.62    2.94
   5  -5   4   33.86    2.58
   5  -5   4   33.80    2.50
  -5   5  -4   32.51    2.53
  -5   5  -4   34.26    2.48
  -5   5  -4   33.79    2.53
  -5   5  -4   33.88    2.50
  -5   5  -4   37.57    2.56
  -5   5  -4   33.46    2.86
  -5   5  -4   33.49    3.21
  -5   5  -4   31.90    2.38
   6   5  -4   21.33    1.82
  -6   5   4   21.15    1.68
  -6   5   4   22.61    1.76
   6   5  -4   22.16    1.94
  -6   5   4   22.55    1.75
  -6   5   4   22.84    1.67
   6   5  -4   21.17    1.92
  -6   5   4   24.22    1.74
   6   5  -4   20.82    1.87
  -6   5   4   21.35    1.74
  -6   5   4   23.66    2.18
  -6   5   4   22.18    2.24
  -6   5   4   23.13    1.79
   6  -5  -4   23.48    1.76
  -6  -5   4   21.49    1.97
  -6  -5   4   23.57    2.11
   6  -5  -4   22.57    1.76
  -6  -5   4   20.52    1.77
  -6  -5   4   22.71    1.92
  -6  -5   4   21.51    1.94
  -6  -5   4   20.85    2.07
  -6  -5   4   22.97    1.94
  -7  -5  -4   20.54    1.67
   7  -5   4   17.31    1.54
   7  -5   4   17.95    1.64
  -7  -5  -4   18.90    2.03
  -7   5  -4   19.36    1.56
  -7   5  -4   16.62    1.58
   7   5   4   17.15    1.64
  -7   5  -4   16.18    1.56
   7   5   4   18.77    1.81
  -7   5  -4   16.19    2.08
   7   5   4   18.16    1.74
  -7   5  -4   16.18    1.44
  -7   5  -4   17.64    1.54
   8   5  -4   15.20    1.58
   8   5  -4   14.26    1.50
   8   5  -4   14.26    1.59
   0   6  -4   72.77    5.97
   0   6  -4   72.65    5.15
   0  -6   4   78.10    5.24
   0   6  -4   74.79    5.82
   0  -6   4   82.00    5.06
   0  -6   4   72.96    5.23
   0   6  -4   73.30    5.13
   0  -6   4   70.35    5.29
   0   6  -4   73.38    5.23
   0  -6   4   73.08    5.17
   0  -6   4   70.33    5.39
   0  -6   4   71.61    5.03
   0   6  -4   76.96    5.34
   0  -6   4   80.53    5.24
   0   6  -4   71.19    5.21
   0  -6   4   73.56    5.22
   0   6  -4   76.91    5.85
  -1  -6  -4   49.21    4.12
   1   6  -4   63.26    4.07
   1   6  -4   63.50    4.14
  -1  -6  -4   55.07    4.12
  -1  -6  -4   48.59    3.99
  -1  -6  -4   52.98    4.03
   1   6  -4   63.18    4.13
   1   6  -4   62.88    4.04
  -1  -6  -4   51.55    4.16
  -1  -6   4   65.58    3.98
  -1  -6   4   64.15    4.08
  -1  -6   4   64.38    4.11
   1   6   4   53.20    4.08
   1   6   4   52.05    3.94
   1   6   4   50.47    4.06
  -1  -6   4   59.56    4.17
  -1  -6   4   60.42    3.96
  -1  -6   4   63.09    4.12
   1   6   4   54.15    4.14
   1   6   4   49.85    4.13
   1   6   4   50.99    4.75
   2   6  -4  155.12   10.52
   2   6  -4  131.10   10.22
   2   6  -4  141.75   10.21
  -2   6   4  169.03   11.69
  -2   6   4  170.41   10.15
   2   6  -4  141.71   10.12
   2   6  -4  145.80   10.20
   2   6  -4  142.99   10.27
   2   6  -4  135.92   10.11
   2   6  -4  140.03    9.75
  -2   6   4  166.96   10.01
   2   6  -4  130.60    9.81
  -2  -6   4  127.50   10.42
   2  -6  -4  168.69    9.80
  -2  -6   4  135.67   10.18
  -2  -6   4  138.85   10.59
  -2  -6   4  126.61   10.30
  -2  -6   4  132.24   10.31
  -2  -6   4  138.73   10.05
   2  -6  -4  170.95    9.83
   2  -6  -4  167.35   10.19
   2  -6  -4  174.29   10.22
  -2  -6   4  131.88   10.21
  -4   6   4   20.44    1.95
  -4   6   4   22.53    1.48
  -4  -6  -4   17.92    1.83
   4   6  -4   16.19    1.47
   4   6  -4   18.96    1.61
   4   6  -4   16.88    1.69
  -4   6   4   22.90    1.45
  -4  -6  -4   22.17    1.77
  -4  -6  -4   18.57    1.71
   4   6  -4   18.45    1.61
  -4  -6  -4   18.23    1.71
  -4   6   4   22.69    1.48
  -4  -6  -4   19.98    1.93
   4   6  -4   17.07    1.54
  -4   6   4   22.90    1.47
  -4  -6  -4   20.89    1.79
  -4   6   4   21.97    1.40
  -4  -6  -4   18.98    1.64
   4   6   4   18.78    1.53
  -4  -6   4   17.82    1.68
  -4  -6   4   17.16    1.65
  -4  -6   4   17.58    1.66
  -4  -6   4   19.29    1.60
   4   6   4   19.15    1.67
  -4  -6   4   17.71    1.75
   4   6   4   19.79    1.63
   4   6   4   19.92    1.68
  -4  -6   4   17.13    1.62
  -4  -6   4   19.73    1.71
   5   6  -4   33.76    2.70
   5   6  -4   35.58    2.84
   5   6  -4   36.36    2.86
   5  -6   4   40.34    2.75
   5   6  -4   34.18    2.78
   5  -6   4   38.68    2.66
  -5   6  -4   38.06    2.70
  -5   6  -4   38.79    2.67
  -5  -6   4   35.37    2.88
  -5  -6   4   34.85    2.93
  -5   6  -4   39.59    2.65
  -5  -6   4   37.29    3.02
  -5   6  -4   36.61    2.68
  -5  -6   4   35.66    2.92
  -5  -6   4   35.10    3.04
  -5  -6   4   32.04    2.72
  -5   6  -4   36.92    2.55
  -5   6  -4   37.20    3.08
  -5   6  -4   35.28    3.42
  -5  -6   4   36.24    2.84
   6   6  -4   59.11    4.39
  -6   6   4   54.80    4.11
  -6  -6  -4   67.46    4.49
  -6   6   4   53.72    3.92
   6   6  -4   55.40    4.29
  -6   6   4   54.23    4.10
  -6   6   4   50.13    4.06
  -6  -6  -4   68.40    4.58
  -6  -6  -4   66.41    4.84
   6   6  -4   55.92    4.19
  -6   6   4   54.19    5.01
  -6   6   4   53.01    3.90
   6   6  -4   58.40    4.39
  -6   6   4   52.07    4.08
   6  -6  -4   57.31    4.17
   6  -6  -4   55.94    4.15
   6   6   4   65.85    4.41
  -6  -6   4   59.87    4.64
  -6  -6   4   59.42    4.50
  -6  -6   4   55.31    4.41
  -6  -6   4   61.03    4.36
   6   6   4   68.55    4.57
  -6  -6   4   55.46    4.35
  -6  -6   4   53.88    4.19
  -6  -6   4   56.58    4.61
   7   6  -4   31.97    2.63
   7   6  -4   30.92    2.54
   7   6  -4   29.63    2.59
  -7  -6   4   29.21    2.53
  -7  -6   4   29.88    2.78
  -7  -6   4   31.82    2.66
   8   6  -4   22.18    2.16
   8   6  -4   23.63    2.28
  -8   6   4   24.10    2.63
  -8   6   4   25.55    1.90
  -8   6   4   25.20    1.91
  -8   6   4   25.43    2.05
  -8   6   4   26.85    2.01
  -8  -6   4   22.26    2.11
   8  -6  -4   25.16    2.07
   0   7  -4  172.97   12.36
   0  -7   4  183.82   12.60
   0  -7   4  171.75   12.72
   0   7  -4  195.43   14.17
   0  -7   4  172.68   12.11
   0  -7   4  177.87   12.59
   0   7  -4  174.56   12.49
   0   7  -4  200.01   12.80
   0  -7   4  173.16   13.01
   0  -7   4  201.01   12.27
   0  -7   4  181.52   12.48
   0  -7   4  199.20   12.62
   0   7  -4  169.18   12.33
   0   7  -4  170.63   12.47
  -1   7   4  107.66    7.93
   1   7  -4  111.96    7.62
   1   7  -4  106.56    7.88
   1   7  -4  127.76    8.23
  -1   7   4  106.95    7.55
   1  -7   4  132.43    8.07
   1   7  -4  110.29    7.91
   1   7  -4  116.71    8.04
  -1   7   4  104.09    9.15
  -1   7   4  102.76    7.84
  -1   7   4  102.80    7.93
   1  -7   4  134.68    7.68
  -1   7   4  106.83    7.85
   1   7  -4  107.06    7.99
   1  -7  -4  106.77    7.99
  -1   7  -4  126.97    7.81
  -1   7  -4  132.43    7.84
   1  -7  -4  104.30    7.69
  -1   7  -4  131.07    9.21
  -1  -7   4  103.76    7.73
  -1  -7   4  114.08    7.98
  -1   7  -4  128.49    7.91
  -1   7  -4  135.73    7.95
   1  -7  -4  110.45    7.73
  -1  -7   4  105.57    8.12
  -1  -7   4  107.21    8.04
   1  -7  -4  110.15    8.02
  -1  -7   4  107.19    8.03
  -1  -7   4  114.98    7.82
  -2   7   4   88.91    5.31
   2   7  -4   73.69    5.24
  -2   7   4   87.24    5.10
   2   7  -4   72.67    5.42
  -2   7   4   84.48    5.35
   2   7  -4   67.85    5.48
   2   7  -4   69.12    5.40
  -2   7   4   89.71    5.31
   2   7  -4   66.71    5.47
  -2  -7   4   67.82    5.29
  -2  -7   4   71.50    5.33
  -2  -7   4   64.56    5.47
  -2  -7   4   70.15    5.61
   2  -7  -4   89.10    5.18
  -2  -7   4   66.33    5.42
   2  -7  -4   88.41    5.36
   3   7  -4   37.51    2.79
  -3   7   4   31.26    2.35
   3   7  -4   36.72    2.70
  -3   7   4   30.37    2.47
  -3   7   4   28.83    2.45
  -3  -7  -4   36.15    2.71
  -3   7   4   29.41    2.97
  -3  -7  -4   35.45    2.76
   3   7  -4   37.92    2.78
  -3  -7  -4   33.04    2.86
   3   7  -4   37.56    2.58
  -3  -7  -4   34.97    2.76
  -3  -7  -4   36.59    2.67
  -3  -7  -4   34.21    2.79
  -3  -7   4   34.30    2.71
   3   7   4   38.79    2.50
   3   7   4   37.99    2.90
  -3  -7   4   37.03    2.75
   3   7   4   36.86    2.63
  -3  -7   4   33.55    2.76
   3   7   4   35.59    3.18
  -3  -7   4   36.81    2.70
  -3  -7   4   33.55    2.61
  -3  -7   4   35.85    2.59
  -3  -7   4   33.66    2.69
   3  -7  -4   30.27    2.35
  -4  -7  -4   30.20    2.60
  -4  -7  -4   28.41    2.23
  -4  -7  -4   26.00    2.31
  -4  -7  -4   29.77    2.34
  -4  -7  -4   26.53    2.30
  -4  -7  -4   26.28    2.44
  -4  -7  -4   27.53    2.37
   4   7   4   27.03    2.01
   4   7   4   26.24    2.63
   4   7   4   27.69    2.15
  -5  -7  -4   52.35    3.91
  -5  -7  -4   57.29    4.18
  -5  -7  -4   51.22    4.08
   5   7  -4   47.62    3.91
  -5  -7  -4   54.79    4.09
   5   7  -4   43.44    3.86
  -5  -7  -4   59.61    4.09
  -5  -7  -4   50.06    4.25
   5  -7   4   59.03    3.72
  -5   7  -4   55.18    3.67
  -5  -7   4   42.42    4.08
  -5   7  -4   57.75    3.73
  -5  -7   4   43.22    3.84
  -5   7  -4   55.04    4.69
  -5   7  -4   58.68    3.67
  -5  -7   4   43.43    3.98
  -5  -7   4   42.42    3.97
   5   7   4   52.39    3.74
  -5   7  -4   59.13    3.71
  -5  -7   4   45.04    4.09
   5   7   4   54.43    4.67
  -5   7  -4   54.79    3.51
   5   7   4   54.69    3.91
   6   7  -4   63.58    4.46
  -6   7   4   53.41    4.10
  -6   7   4   56.25    4.09
  -6   7   4   54.40    3.90
  -6   7   4   55.15    4.09
  -6   7   4   54.43    5.11
   6   7  -4   59.17    4.31
   6   7  -4   60.98    4.22
  -6   7   4   55.47    4.13
  -6   7   4   53.35    3.90
  -6  -7   4   60.41    4.31
  -6  -7   4   59.23    4.53
  -6  -7   4   59.88    4.48
  -6  -7   4   65.44    4.63
  -6  -7   4   61.28    4.72
  -6  -7   4   65.52    4.49
  -7   7   4   71.51    4.86
  -7   7   4   68.92    4.55
  -7   7   4   66.74    4.75
  -7   7   4   69.67    5.97
  -7   7   4   68.70    4.54
  -7   7   4   71.04    4.76
  -7   7   4   67.95    4.82
  -7  -7   4   53.88    5.12
  -8   7   4   25.22    2.07
  -8   7   4   26.18    2.79
  -8   7   4   25.06    1.87
   0   8   4  133.59    9.02
   0   8  -4  121.42    8.93
   0   8   4  130.17    8.60
   0   8  -4  124.89    8.84
   0  -8   4  124.91    9.31
   0  -8  -4  136.74    9.00
   0  -8   4  129.45    9.00
   0  -8  -4  127.90    9.07
   0   8  -4  130.34    8.98
   0  -8   4  126.33    8.66
   0   8   4  135.83   10.42
   0   8  -4  125.90    8.86
   0   8   4  127.30    9.03
   0   8   4  125.29    8.89
   0  -8  -4  126.63    8.75
   0  -8  -4  130.46    9.09
   0  -8   4  127.56    9.01
   0   8   4  134.37    8.93
  -1   8   4   68.90    5.16
  -1   8   4   69.71    5.12
   1   8  -4   77.80    5.02
   1   8  -4   83.21    5.85
  -1   8   4   68.01    5.17
   1   8  -4   76.51    5.28
  -1   8   4   74.34    5.14
  -1   8   4   68.86    6.00
   1   8  -4   73.18    5.25
   1   8  -4   77.27    5.19
  -1   8   4   68.48    4.92
   1   8  -4   76.04    5.20
  -1  -8   4   78.38    5.22
   1  -8  -4   69.33    5.19
   1  -8  -4   67.83    5.00
  -1  -8   4   72.46    5.30
  -1  -8   4   73.67    5.25
  -1  -8   4   71.61    5.05
  -1  -8   4   72.10    5.24
   1  -8  -4   71.39    5.21
   2   8  -4   40.59    3.34
  -2   8   4   52.45    3.24
   2   8  -4   42.31    3.36
   2   8  -4   39.42    3.38
   2   8  -4   41.86    3.41
  -2   8   4   50.20    3.22
  -2   8   4   48.71    3.24
  -2   8   4   53.51    3.90
   2   8  -4   42.84    3.26
  -2  -8   4   37.99    3.35
   2  -8  -4   50.32    3.23
  -2  -8   4   38.03    3.24
  -2  -8   4   39.58    3.33
   2  -8  -4   50.86    3.14
  -2  -8   4   42.24    3.26
  -2  -8   4   37.32    3.40
   2  -8  -4   52.74    3.27
  -3   8   4   26.19    1.84
  -3   8   4   25.05    1.83
  -3  -8  -4   24.37    2.04
  -3  -8  -4   24.96    2.14
  -3   8   4   27.26    1.76
  -3  -8  -4   21.89    2.19
  -3  -8  -4   22.61    2.11
  -3  -8  -4   25.76    2.11
  -3  -8  -4   23.43    2.15
  -3   8   4   25.63    1.84
  -3   8   4   26.70    2.32
  -3   8   4   27.19    1.85
   3   8   4   23.85    2.45
  -3   8  -4   24.03    1.79
  -3   8  -4   24.92    1.79
   3   8   4   25.26    2.26
  -3   8  -4   23.03    2.40
  -3   8  -4   24.96    1.80
   3  -8  -4   26.14    1.77
   5   8  -4   18.90    1.48
   5   8  -4   18.06    1.34
  -5  -8   4   18.62    1.78
  -5  -8   4   17.50    1.75
  -5  -8   4   18.70    1.74
  -5  -8   4   17.93    1.83
  -5  -8   4   18.38    1.62
  -5  -8   4   17.93    1.72
  -6  -8  -4   15.45    1.65
  -6  -8  -4   12.24    1.64
  -6  -8  -4   13.81    1.48
  -6  -8  -4   13.50    1.54
   6   8   4   14.37    1.35
   6   8   4   12.96    1.73
   7   8  -4   18.79    1.82
  -7   8  -4   23.10    1.57
  -7   8  -4   23.15    1.85
  -7   8  -4   20.08    2.48
  -7  -8   4   20.89    2.11
  -7   8  -4   25.12    1.81
   0   9  -4   14.33    1.25
   0   9  -4   14.27    1.24
   0  -9   4   14.46    1.17
   0  -9   4   14.08    1.19
   0   9  -4   13.99    1.21
   0   9  -4   14.46    1.24
   0  -9   4   14.46    1.21
  -1   9   4   27.05    2.36
  -1   9   4   25.00    1.93
  -1   9   4   25.82    1.87
   1   9  -4   23.70    1.90
   1   9  -4   24.16    1.97
  -1   9   4   25.89    1.92
   1   9  -4   22.77    1.98
  -1   9   4   25.82    1.97
   1   9  -4   22.48    1.95
  -1   9   4   24.92    1.93
   1   9  -4   25.30    2.03
  -1  -9   4   22.93    1.89
   1  -9  -4   25.12    1.93
  -1  -9   4   22.92    1.94
   1  -9  -4   25.67    1.88
   1  -9  -4   25.64    1.93
  -1  -9   4   22.38    1.95
  -1  -9   4   22.55    1.94
  -2   9   4    6.73    0.68
   2   9  -4    6.78    0.84
  -2   9   4    6.63    0.64
   2   9  -4    6.90    0.86
  -2   9   4    6.63    0.68
   2   9  -4    7.16    0.85
   2   9  -4    8.02    0.84
   2   9  -4    6.72    0.83
  -2   9   4    7.33    0.92
  -2   9   4    6.62    0.67
  -2   9   4    7.36    0.70
  -2  -9   4    6.97    0.80
   2  -9  -4    7.05    0.70
  -2  -9   4    6.29    0.77
  -2  -9   4    6.72    0.78
  -2  -9   4    6.14    0.75
   2  -9  -4    7.05    0.66
   2  -9  -4    6.65    0.64
  -3  -9  -4    1.17    0.42
  -3  -9  -4    1.32    0.42
  -3   9  -4    2.36    0.28
  -3   9  -4    2.30    0.60
   3   9   4    0.87    0.55
  -3   9  -4    2.28    0.30
  -4   9  -4    7.96    0.71
  -4  -9   4    8.18    1.02
  -4   9  -4    8.57    1.23
  -4   9  -4    9.18    0.74
  -4  -9   4   10.05    1.02
  -4  -9   4    8.83    1.06
  -4  -9   4    8.98    1.07
  -5   9   4    5.98    0.61
  -5   9   4    5.44    0.58
  -5   9  -4    6.97    1.10
  -5   9  -4    7.58    0.61
  -5   9  -4    6.86    0.64
  -6  -9  -4   14.02    1.62
  -6  -9  -4   12.87    1.45
  -6  -9   4   12.53    1.48
  -6  -9   4   12.09    1.40
  -6  -9   4   11.30    1.39
   1  10  -4   22.55    1.81
   1  10  -4   20.89    1.81
   1  10  -4   20.69    1.79
   1  10  -4   19.61    1.77
   1  10  -4   21.65    1.73
  -1 -10   4   20.32    1.76
  -1 -10   4   21.36    1.73
  -1 -10   4   20.78    1.76
   2 -10   4    5.71    0.54
   2 -10   4    4.89    0.53
  -2  10  -4    4.83    0.53
  -2  10  -4    5.32    0.55
  -2  10  -4    5.12    0.50
  -2  10  -4    5.67    0.53
  -3  10   4    8.26    0.69
  -3  10   4    7.98    0.69
  -3  10   4    8.32    0.68
  -3  10   4    8.07    0.75
   3  10  -4    8.26    1.06
  -3  10   4    8.07    0.76
   3 -10  -4    7.76    0.72
  -3 -10   4    7.52    0.96
  -3 -10   4    8.00    0.98
  -3 -10   4    7.29    0.96
  -4 -10  -4    5.74    0.93
  -4 -10  -4    6.10    0.91
  -4 -10  -4    6.23    0.96
   4  10   4    6.23    1.20
  -5 -10  -4    3.58    0.78
  -5 -10   4    3.71    0.75
  -5  10  -4    2.08    0.35
  -5 -10   4    3.78    0.78
  -5  10  -4    2.35    0.35
  -5  10  -4    1.87    0.70
  -5 -10   4    3.57    0.75
  -6  10   4   18.76    1.32
  -6  10   4   17.63    1.28
  -6 -10   4   12.68    1.72
  -6 -10   4   12.64    1.63
   0  11  -4   83.87    5.81
   0 -11   4   81.74    5.86
   0  11  -4   74.91    5.77
   0 -11   4   76.25    5.84
   0  11  -4   85.43    5.85
   0  11  -4   82.73    5.81
  -1  11   4   46.37    3.58
  -1  11   4   49.46    3.59
  -1  11   4   47.73    3.56
  -1  11   4   47.97    3.57
  -1  11   4   46.53    3.42
   1 -11  -4   49.79    3.59
   1 -11  -4   44.82    3.58
   2  11  -4   18.70    1.74
   2  11  -4   18.45    1.73
  -2 -11   4   19.23    1.72
  -2 -11   4   16.91    1.66
  -3 -11  -4   12.40    1.34
   3  11  -4    9.63    1.25
  -3 -11  -4   12.98    1.38
  -3 -11  -4   12.01    1.35
  -3 -11   4    9.33    1.19
  -3 -11   4    9.94    1.23
  -3 -11   4    8.88    1.17
   3  11   4   14.38    1.74
  -4 -11  -4   14.41    1.85
  -4  11  -4   20.08    1.44
   4  11   4   16.97    2.29
  -4  11  -4   20.36    1.45
  -4  11  -4   23.02    2.29
  -5  11  -4   12.91    1.04
  -5 -11   4   11.16    1.48
  -5 -11   4    9.86    1.46
  -5  11  -4   16.10    1.11
  -5  11  -4   16.76    1.95
   0  12  -4   48.44    3.50
   0 -12   4   43.29    3.47
   0  12  -4   46.52    3.50
   0 -12   4   44.31    3.49
   0  12  -4   45.84    3.45
   1 -12   4   13.20    1.25
  -1  12  -4   13.50    1.26
  -1  12  -4   13.54    1.18
  -1  12  -4   13.87    1.22
  -1  12  -4   15.05    1.31
  -2  12   4    7.59    0.85
  -2  12   4    7.60    0.78
  -2  12   4    7.85    0.80
  -2  12   4    8.39    0.89
  -2  12   4    8.07    0.78
   2 -12  -4    7.12    0.86
  -4 -12   4    0.00    0.42
   0 -13   4    8.24    1.00
   0  13  -4    8.57    1.03
   0 -13   4    8.72    1.02
   1 -13   4    9.38    1.02
   1  13  -4   10.50    1.17
  -1 -13   4   10.25    1.14
  -1  13  -4    8.84    1.00
  -1 -13   4    8.35    1.08
  -2  13  -4    1.41    0.40
  -2  13  -4    1.67    0.40
   0   0  -5   60.42    4.25
   0   0  -5   61.79    4.33
   0   0   5   63.85    4.26
   0   0   5   63.47    4.95
   0   0   5   68.02    4.38
   0   0  -5   58.77    4.26
   0   0  -5   59.02    4.31
   0   0   5   63.86    4.28
   0   0  -5   62.08    4.93
   0   0   5   60.48    4.33
   0   0  -5   62.33    4.33
   0   0   5   59.93    4.24
   0   0  -5   62.52    4.37
   0   0  -5   61.90    4.37
   0   0  -5   61.28    4.36
   0   0   5   58.91    4.43
   0   0   5   58.18    4.32
   0   0  -5   62.28    4.44
   0   0   5   66.65    4.38
   0   0  -5   62.27    4.24
   0   0   5   61.91    4.12
   0   0   5   58.74    4.31
   0   0   5   62.41    4.38
   0   0   5   60.66    4.37
   4   0  -5   20.96    1.47
  -4   0   5   19.43    1.48
  -4   0   5   21.18    1.47
  -4   0   5   19.44    1.42
  -4   0   5   16.94    1.53
   4   0  -5   20.37    1.48
  -4   0   5   18.77    1.48
   4   0  -5   18.61    1.50
  -4   0   5   18.84    1.46
   4   0  -5   18.47    1.50
  -4   0   5   19.13    1.55
  -4   0   5   18.77    1.45
   4   0  -5   18.62    1.51
   4   0  -5   18.94    1.50
   4   0  -5   20.54    1.68
  -4   0   5   17.88    1.62
  -4   0   5   19.00    1.54
  -4   0   5   18.42    1.65
  -4   0   5   17.59    1.49
  -5   0   5  158.65   10.14
   5   0  -5  164.58   10.33
  -5   0   5  146.80   12.01
  -5   0   5  151.88   10.14
   5   0  -5  152.99   10.61
   5   0  -5  154.25   10.45
  -5   0   5  157.65   10.54
  -5   0   5  161.13   10.68
  -5   0   5  146.71   10.48
   5   0  -5  149.23   10.56
   5   0  -5  149.82   10.71
  -5   0   5  146.03   11.15
  -5   0   5  140.29   10.83
   5   0  -5  150.73   10.70
  -5   0   5  146.71   10.62
  -5   0   5  162.31   10.60
   6   0  -5   43.96    3.22
  -6   0   5   43.35    3.63
   6   0  -5   41.14    3.24
  -6   0   5   42.90    3.14
  -6   0   5   42.23    3.49
  -6   0   5   40.63    3.32
  -6   0   5   45.87    3.34
  -6   0  -5   33.91    3.09
  -6   0   5   43.52    3.21
  -6   0   5   45.95    3.16
   6   0  -5   46.31    3.18
  -6   0   5   42.27    3.28
   6   0  -5   42.12    3.25
   9   0  -5    0.05    0.36
   9   0  -5    0.30    0.42
   0  -1   5  201.52   12.56
   0   1  -5  197.74   13.20
   0  -1   5  189.77   13.23
   0  -1   5  203.50   13.33
   0  -1   5  185.92   13.04
   0   1  -5  187.21   13.33
   0   1  -5  190.48   13.32
   0   1  -5  190.91   13.32
   0  -1   5  198.76   13.04
   0  -1   5  186.75   13.01
   0  -1   5  193.06   13.36
   0  -1   5  197.40   13.17
   0   1  -5  189.74   13.02
   0  -1   5  183.52   13.33
   0   1  -5  194.69   13.05
   0   1  -5  201.01   13.32
   0   1  -5  196.87   13.48
   0  -1   5  188.89   15.00
   0   1  -5  185.45   12.99
   0  -1   5  193.56   13.49
   0   1  -5  198.38   13.21
   0   1  -5  201.86   15.01
   0  -1   5  199.37   13.35
   0   1  -5  182.19   12.54
   0  -1   5  192.35   13.18
   0   1  -5  182.53   13.16
   1  -1   5  253.66   15.07
  -1   1   5  191.10   14.61
   1  -1   5  248.23   15.28
  -1   1   5  195.68   14.86
   1  -1   5  245.77   15.07
   1  -1   5  251.86   15.46
   1  -1   5  251.74   14.90
  -1   1   5  197.11   15.21
  -1   1   5  209.62   15.21
   1  -1   5  255.21   17.18
   1  -1   5  249.04   15.10
  -1   1   5  196.75   15.02
  -1   1   5  200.11   15.06
  -1   1   5  215.01   15.06
  -1   1   5  198.74   17.16
  -1   1   5  205.86   15.19
  -1   1   5  192.16   15.38
   1  -1   5  252.50   15.25
  -1   1   5  208.31   14.31
  -1   1   5  198.99   15.19
  -1   1   5  191.42   15.02
   1  -1  -5  203.68   15.09
   1  -1  -5  192.00   14.61
  -1   1  -5  248.23   14.36
   1  -1  -5  202.10   14.86
   1  -1  -5  200.68   15.38
   1  -1  -5  198.49   15.19
   1  -1  -5  197.18   15.02
  -1   1  -5  250.78   15.77
   1  -1  -5  192.80   14.85
   1  -1  -5  198.84   15.03
   1  -1  -5  207.32   15.23
  -1   1  -5  253.00   14.91
  -1   1  -5  247.55   14.93
  -1   1  -5  248.93   15.23
  -1   1  -5  257.59   14.91
  -1   1  -5  260.34   15.23
   1  -1  -5  204.93   14.88
   1  -1  -5  190.10   15.22
  -1   1  -5  258.74   15.08
  -1   1  -5  242.26   14.89
   1  -1  -5  201.23   14.31
   3   1  -5   11.23    0.96
   3   1  -5    9.66    0.88
   3   1  -5   11.61    0.88
   3   1  -5   10.32    0.84
   3   1  -5   10.31    0.84
   3   1  -5   10.59    0.89
   3   1  -5   10.46    0.89
   3   1  -5   10.32    0.89
  -3  -1   5   10.45    0.90
  -3  -1   5   10.35    0.87
  -3  -1   5    9.59    0.92
  -3  -1   5   10.63    0.88
  -3  -1   5   11.08    0.87
  -3  -1   5   10.94    0.83
  -3  -1   5   10.13    0.88
  -3  -1   5    9.77    0.81
  -3  -1   5   10.92    0.86
  -3  -1   5   10.06    0.87
  -3  -1   5   10.54    0.93
  -3  -1   5   10.81    0.89
  -3  -1   5    9.66    0.90
  -4  -1  -5   64.15    4.53
  -4  -1  -5   68.02    4.64
  -4  -1  -5   62.77    4.39
  -4  -1  -5   62.99    4.51
  -4  -1  -5   57.14    4.36
  -4  -1  -5   71.64    4.68
  -4  -1  -5   62.81    4.58
  -4  -1  -5   61.30    4.58
  -4  -1  -5   62.07    4.67
  -4  -1  -5   60.47    4.91
  -4  -1  -5   68.63    4.43
   4   1   5   57.09    4.65
   4   1   5   65.00    4.60
   4   1   5   68.18    4.58
   4   1   5   65.46    4.66
   4   1   5   63.48    4.63
   4   1   5   63.29    4.58
   5   1  -5   92.11    6.07
   5   1  -5   80.51    6.25
   5   1  -5   85.43    6.26
   5   1  -5   87.60    6.10
   5   1  -5   83.52    6.19
   5   1  -5   88.25    6.21
  -5  -1   5   84.41    5.97
  -5  -1   5   85.36    6.14
  -5  -1   5   92.25    6.22
  -5  -1   5   92.14    6.08
  -5  -1   5   90.17    6.00
  -5  -1   5   94.01    6.22
  -5  -1   5   86.90    6.20
  -5  -1   5   88.07    6.98
  -5  -1   5   93.88    6.32
  -5  -1   5   77.94    6.35
  -5  -1   5   83.55    6.54
  -5  -1   5   90.72    5.98
  -5  -1   5   82.83    6.24
  -6   1   5  172.76   12.65
   6   1  -5  129.66   11.06
  -6   1   5  178.04   11.18
  -6   1   5  168.81   11.74
  -6   1   5  171.13   11.14
  -6   1   5  166.30   10.61
  -6   1   5  172.40   11.00
  -6   1   5  162.65   11.33
   6   1  -5  134.92   10.90
   6  -1  -5  171.38   11.22
   6  -1  -5  170.01   11.21
  -6  -1   5  135.54   10.59
  -6  -1   5  133.38   12.51
  -7   1   5   36.34    3.20
   7  -1   5   39.48    2.91
  -7   1   5   36.63    2.90
  -7   1   5   35.65    2.80
  -7   1   5   34.16    2.84
   7  -1   5   36.78    2.98
  -7   1   5   35.41    3.08
   7  -1   5   35.42    2.87
  -7   1   5   35.93    2.74
  -7   1  -5   38.76    3.05
   7  -1  -5   33.75    2.81
  -7  -1   5   27.15    2.68
   7  -1  -5   35.51    2.83
   7  -1  -5   36.40    2.80
  -7   1  -5   36.74    3.55
  -7   1  -5   36.46    3.01
   9   1  -5    1.90    0.60
   9   1  -5    1.98    0.62
   0  -2  -5  338.83   20.66
   0  -2   5  294.66   21.75
   0   2   5  339.28   21.70
   0  -2  -5  362.20   21.71
   0  -2   5  312.46   20.62
   0  -2   5  290.16   21.64
   0   2   5  329.33   21.95
   0   2  -5  292.36   21.49
   0  -2  -5  331.42   21.98
   0  -2   5  292.95   24.66
   0  -2  -5  335.65   22.00
   0  -2   5  294.43   21.42
   0   2  -5  289.29   20.62
   0  -2   5  292.92   21.93
   0   2  -5  298.85   21.93
   0   2   5  338.06   21.11
   0   2  -5  314.72   21.91
   0  -2   5  301.23   21.64
   0  -2  -5  337.55   22.20
   0   2  -5  296.36   21.73
   0   2  -5  310.62   21.91
   0   2  -5  301.03   21.91
   0   2   5  360.31   21.75
   0  -2   5  291.07   21.95
   0   2   5  341.43   21.97
   0  -2   5  320.87   21.92
   0   2   5  343.49   21.94
   0   2  -5  315.92   22.16
   0   2  -5  291.98   21.64
   0  -2  -5  345.08   21.70
   0  -2   5  300.17   22.16
   0  -2  -5  325.60   21.47
   0   2   5  321.57   21.49
   0  -2   5  304.68   21.44
   0   2  -5  295.65   21.70
   0   2  -5  307.76   21.53
   0   2  -5  314.33   24.66
   0  -2  -5  356.00   21.48
   0   2   5  351.42   21.50
   0  -2  -5  342.73   21.78
   0   2  -5  303.46   21.66
   0   2   5  344.34   20.67
   0   2   5  330.72   24.79
   0   2  -5  277.59   21.45
   0  -2   5  309.02   21.94
   0   2   5  315.28   21.75
   0   2   5  322.73   21.45
   0   2   5  341.09   22.23
   0   2  -5  298.49   21.45
   0   2   5  331.14   21.70
   0   2  -5  303.20   22.92
   0  -2  -5  364.42   21.98
  -1  -2  -5  383.91   27.28
   1   2  -5  414.14   27.89
  -1  -2  -5  404.30   27.32
  -1  -2  -5  397.84   27.94
   1   2  -5  466.40   31.77
   1   2  -5  413.76   29.35
  -1  -2  -5  392.23   28.19
  -1  -2  -5  381.84   27.67
   1   2  -5  416.53   27.64
   1   2  -5  397.68   26.21
   1   2  -5  393.63   27.52
   1   2  -5  441.85   27.89
   1   2  -5  397.43   27.27
  -1  -2  -5  378.05   27.90
  -1  -2  -5  410.95   27.29
   1   2  -5  434.56   31.34
   1   2  -5  423.33   27.29
   1   2  -5  406.92   27.89
  -1  -2  -5  374.25   27.52
   1   2  -5  419.83   28.16
   1   2  -5  428.83   27.25
   1   2  -5  403.77   26.80
  -1  -2   5  394.34   27.25
   1   2   5  378.38   27.91
   1   2   5  401.93   27.58
   1   2   5  404.36   27.28
  -1  -2   5  413.46   31.38
   1   2   5  365.39   31.40
   1   2   5  416.05   26.26
  -1  -2   5  426.09   27.53
  -1  -2   5  422.83   27.26
  -1  -2   5  414.39   27.53
   1   2   5  379.89   27.67
   1   2   5  387.21   27.30
  -1  -2   5  398.51   27.89
  -1  -2   5  424.05   27.88
   1   2   5  403.72   26.85
  -1  -2   5  400.54   26.81
  -1  -2   5  438.41   26.22
  -1  -2   5  400.44   27.25
  -1  -2   5  400.11   27.66
   1   2   5  358.60   27.27
  -1  -2   5  408.12   27.90
  -1  -2   5  438.65   27.88
   1   2   5  396.15   28.22
  -1  -2   5  391.12   28.16
   2   2  -5   94.38    6.63
   2   2  -5   94.48    6.49
   2   2  -5   96.21    6.36
   2   2  -5   98.00    6.81
   2   2  -5   92.41    6.45
   2   2  -5   93.15    6.56
   2   2  -5  103.57    6.76
   2   2  -5   88.12    6.60
   2   2  -5   99.06    6.59
   2   2  -5   92.09    6.26
  -2  -2   5   99.07    6.59
  -2  -2   5   92.88    6.63
  -2  -2   5   98.11    6.48
  -2  -2   5   91.53    6.45
  -2  -2   5   92.64    6.24
  -2  -2   5   93.07    6.58
  -2  -2   5   92.77    6.38
  -2  -2   5   95.89    6.46
  -2  -2   5   92.05    6.80
  -2  -2   5   90.82    6.72
  -2  -2   5   93.84    6.56
   3   2  -5   20.41    1.60
   3   2  -5   20.78    1.56
   3   2  -5   21.15    1.61
   3   2  -5   20.60    1.57
   3   2  -5   20.20    1.53
   3   2  -5   19.85    1.56
   3   2  -5   19.82    1.49
   3   2  -5   18.79    1.52
  -3  -2   5   19.79    1.55
  -3  -2   5   19.95    1.59
  -3  -2   5   19.03    1.60
  -3  -2   5   20.84    1.55
  -3  -2   5   18.36    1.46
  -3  -2   5   20.00    1.58
  -3  -2   5   20.57    1.57
  -3  -2   5   19.23    1.50
  -3  -2   5   19.66    1.62
  -3  -2   5   19.57    1.52
  -3  -2   5   20.11    1.60
   4  -2   5   82.47    5.92
  -4   2   5   81.04    5.91
  -4   2   5   81.54    6.77
  -4   2   5   80.39    5.83
  -4   2   5   82.26    5.65
   4  -2   5   82.01    6.07
  -4   2   5   81.70    5.93
  -4   2   5   85.58    6.06
  -4   2   5   81.89    5.62
  -4   2   5   86.49    5.86
  -4   2   5   84.15    6.31
   4  -2   5   82.12    5.86
   4  -2   5   79.31    5.98
   4  -2   5   86.88    5.86
   4  -2  -5   89.50    5.97
  -4   2  -5   76.09    6.33
   4  -2  -5   91.24    5.93
   4  -2  -5   93.83    5.81
   4  -2  -5   93.24    6.00
  -4   2  -5   79.34    5.85
  -4   2  -5   80.87    5.92
  -4   2  -5   82.82    5.68
  -4   2  -5   76.96    6.95
  -4   2  -5   91.65    6.14
   4  -2  -5   85.85    5.97
   4  -2  -5   89.90    5.75
   4  -2  -5   93.59    5.97
  -4   2  -5   85.22    5.97
   4  -2  -5   90.26    6.36
  -4   2  -5   75.15    5.96
  -5   2   5  180.44   13.06
  -5   2   5  172.38   12.56
   5   2  -5  191.75   13.41
  -5   2   5  169.42   13.16
  -5   2   5  184.13   13.21
   5   2  -5  194.32   13.07
  -5   2   5  172.99   15.05
   5   2  -5  199.20   13.27
  -5   2   5  175.05   13.03
  -5   2   5  178.33   12.54
  -5   2   5  177.53   13.46
   5   2  -5  202.44   13.30
  -5   2   5  171.48   13.89
  -5  -2   5  196.43   13.32
  -5  -2   5  210.72   15.00
   5  -2  -5  192.45   13.00
  -5  -2   5  199.45   12.99
  -5  -2   5  203.72   12.89
  -5  -2   5  202.34   13.22
  -5  -2   5  208.11   12.71
  -5  -2   5  208.38   13.40
  -5  -2   5  203.73   13.93
   5  -2  -5  173.61   13.30
  -5  -2   5  206.35   13.39
   5  -2  -5  174.78   13.31
   5  -2  -5  199.86   13.23
  -5  -2   5  200.60   12.70
  -5  -2   5  181.11   13.57
  -5  -2   5  209.15   13.16
  -5  -2   5  196.89   12.97
   5  -2  -5  194.17   12.83
  -6   2   5  123.69    8.68
  -6   2   5  125.88    9.34
  -6   2   5  121.12    8.38
  -6   2   5  127.22    8.37
  -6   2   5  132.12    8.83
  -6   2   5  127.78    8.71
  -6   2   5  126.25    8.96
  -6   2   5  119.26    8.77
  -6   2   5  120.28   10.02
   6  -2  -5  122.13    8.84
   6  -2  -5  123.05    8.83
   6  -2  -5  129.19    8.77
   7  -2   5   27.82    2.22
   7  -2   5   24.95    2.18
   7  -2   5   26.03    2.31
  -7   2  -5   24.90    2.26
  -7   2  -5   24.37    2.75
  -7   2  -5   24.50    2.28
  -7   2  -5   28.17    2.35
  -7   2  -5   27.87    2.16
  -8  -2  -5    2.59    0.90
   8  -2   5    4.80    0.83
   8   2   5    2.27    0.60
   8   2   5    2.60    0.61
  -8   2  -5    4.47    1.04
  -8   2  -5    3.97    0.78
   9   2  -5    0.92    0.51
  -9   2   5    1.12    0.45
   9   2  -5    0.93    0.51
  -9   2   5    0.78    0.51
   9  -2  -5    0.92    0.44
   1   3  -5  246.09   17.51
   1   3  -5  257.67   18.12
   1   3  -5  265.19   17.55
  -1  -3  -5  266.72   17.84
   1   3  -5  251.98   17.71
   1   3  -5  261.62   17.55
   1   3  -5  257.66   17.73
   1   3  -5  257.74   20.20
   1   3  -5  259.71   17.49
   1   3  -5  268.54   17.92
   1   3  -5  255.71   17.92
  -1  -3  -5  243.96   17.54
   1   3  -5  268.46   17.75
  -1  -3  -5  258.65   16.88
   1   3  -5  273.42   17.91
   1   3  -5  267.39   17.76
   1   3  -5  246.48   16.87
  -1  -3  -5  257.94   17.97
   1   3  -5  263.86   20.13
  -1  -3  -5  282.48   17.59
  -1  -3  -5  260.91   17.76
   1   3   5  250.81   17.52
  -1  -3   5  256.78   17.51
   1   3   5  248.69   20.25
   1   3   5  252.17   17.95
   1   3   5  258.60   17.81
  -1  -3   5  267.95   17.93
  -1  -3   5  243.19   17.93
   1   3   5  260.70   16.91
  -1  -3   5  264.48   17.70
   1   3   5  247.60   18.18
  -1  -3   5  254.04   17.24
  -1  -3   5  269.39   17.53
   1   3   5  275.18   17.80
  -1  -3   5  249.23   18.11
  -1  -3   5  254.03   17.93
  -1  -3   5  270.17   17.73
   1   3   5  261.45   17.27
   1   3   5  259.14   17.59
  -1  -3   5  266.08   16.86
  -1  -3   5  269.94   17.81
  -2  -3  -5  131.12    8.96
  -2  -3  -5  124.36    8.99
  -2  -3  -5  124.85    8.78
  -2  -3  -5  119.94    8.92
  -2  -3  -5  122.96    8.68
  -2  -3  -5  132.57    8.91
   2   3   5  127.36    8.94
   2   3   5  120.64    8.77
   2   3   5  133.55    8.52
   2   3   5  123.63    8.90
   2   3   5  130.88    8.68
   2   3   5  137.04    8.78
   2   3   5  141.48    8.97
   2   3   5  128.44    8.99
   2   3   5  128.58    8.83
   2   3   5  122.83    9.00
   2   3   5  130.06    8.83
  -3  -3  -5    8.12    0.75
  -3  -3  -5    8.12    0.76
  -3  -3  -5    7.13    0.75
  -3  -3  -5    6.15    0.66
  -3  -3  -5    6.84    0.74
  -3  -3  -5    7.91    0.81
  -3  -3  -5    7.43    0.74
  -3  -3  -5    6.41    0.82
  -3  -3  -5    7.15    0.78
   3   3   5    7.08    0.79
   3   3   5    8.30    0.73
   3   3   5    6.99    0.75
   3   3   5    7.72    0.73
   3   3   5    7.02    0.76
   3   3   5    8.53    0.85
   3   3   5    7.09    0.71
   3   3   5    7.08    0.73
   4  -3   5   32.57    2.71
   4  -3   5   33.43    2.65
   4   3  -5   41.22    2.68
   4   3  -5   35.74    2.70
   4   3  -5   36.62    2.75
   4  -3   5   35.68    2.62
   4   3  -5   40.27    2.86
   4   3  -5   35.77    2.64
   4   3  -5   40.88    2.69
   4  -3   5   35.02    2.58
   4   3  -5   37.96    2.75
   4   3  -5   38.12    2.76
   4   3  -5   36.26    2.63
  -4   3  -5   34.01    2.54
  -4  -3   5   37.85    2.79
  -4  -3   5   40.36    2.68
  -4  -3   5   36.14    2.67
  -4  -3   5   37.96    2.77
  -4   3  -5   32.34    2.65
  -4   3  -5   30.76    2.67
  -4  -3   5   34.94    2.62
  -4  -3   5   33.63    2.81
  -4  -3   5   39.38    2.93
  -4   3  -5   32.63    2.60
  -4   3  -5   32.06    3.23
  -4  -3   5   38.18    2.77
  -4  -3   5   39.94    2.84
  -4   3  -5   32.27    2.91
  -4   3  -5   34.01    2.67
  -4  -3   5   37.85    2.85
  -4   3  -5   37.49    2.78
  -4  -3   5   40.13    2.73
  -4  -3   5   36.84    2.72
  -5  -3  -5   52.97    4.60
   5  -3   5   60.71    4.60
   5  -3   5   59.06    4.50
   5  -3   5   64.24    4.47
  -5   3   5   74.04    4.31
  -5   3  -5   66.39    4.53
  -5   3  -5   58.36    4.87
  -5   3  -5   58.19    5.37
  -5   3  -5   63.01    4.43
  -5   3  -5   64.47    4.52
  -5   3  -5   62.48    4.29
  -5   3  -5   65.21    4.66
  -5   3  -5   60.56    4.55
   6  -3   5   87.97    6.53
   6  -3   5   96.88    6.69
   6   3  -5   85.65    6.41
   6   3  -5   87.55    6.61
   6   3  -5   87.78    6.62
   6   3  -5   88.63    6.55
  -6  -3   5   88.43    6.45
  -6   3  -5   89.24    6.50
  -6   3  -5   95.22    6.43
  -6  -3   5   94.23    6.59
  -6  -3   5   86.65    6.28
  -6   3  -5   95.86    7.09
  -6  -3   5   95.40    6.40
  -6   3  -5   93.33    6.21
  -6  -3   5   96.28    7.31
  -6  -3   5   80.52    6.73
  -6  -3   5   92.49    6.93
  -6  -3   5   96.54    6.63
  -6   3  -5   91.83    6.68
  -6   3  -5   86.69    7.69
  -6   3  -5   94.23    6.60
   7   3  -5   36.80    3.07
   7   3  -5   38.43    2.97
   7   3  -5   37.55    3.09
   7   3  -5   36.19    3.03
  -7  -3   5   35.91    3.18
  -7  -3   5   40.60    2.84
  -7  -3   5   41.75    3.35
  -8  -3  -5    5.83    1.30
   8  -3   5    7.63    0.97
   8  -3   5    8.18    1.08
  -8   3  -5    7.57    1.38
  -8   3  -5    8.70    1.06
  -8   3  -5    7.77    1.07
  -8   3  -5    7.86    0.93
   8   3   5    7.28    1.01
  -9   3   5    4.26    0.94
  -9   3   5    4.93    0.75
   9  -3  -5    4.32    0.78
   0  -4  -5  210.57   13.88
   0  -4   5  213.47   14.61
   0   4  -5  215.79   16.62
   0  -4   5  206.94   14.72
   0  -4  -5  211.90   14.58
   0  -4  -5  222.12   14.64
   0   4  -5  210.52   16.55
   0   4   5  217.18   14.96
   0   4   5  217.03   14.46
   0  -4  -5  205.57   14.42
   0  -4   5  220.74   15.30
   0  -4   5  226.66   14.72
   0   4  -5  201.86   14.54
   0   4  -5  195.71   13.85
   0   4   5  212.20   16.74
   0  -4  -5  220.89   14.78
   0  -4  -5  233.97   14.79
   0   4   5  209.06   14.13
   0   4   5  204.25   14.45
   0  -4   5  199.99   14.87
   0  -4   5  221.81   14.74
   0   4  -5  212.71   14.42
   0  -4  -5  226.12   14.42
   0   4  -5  201.12   14.41
   0  -4   5  198.74   14.73
   0  -4  -5  203.39   14.77
   0   4  -5  198.35   14.54
   0  -4   5  204.20   14.16
   0  -4  -5  211.58   14.21
   0  -4  -5  209.34   14.77
   0   4   5  229.82   14.64
   0   4   5  234.17   13.94
   0  -4   5  204.03   14.52
   0  -4   5  227.81   14.39
   0  -4   5  217.09   14.36
   0   4   5  215.86   14.60
  -1  -4  -5  163.90   11.62
  -1  -4  -5  159.56   10.91
  -1  -4  -5  158.32   11.33
  -1  -4  -5  168.79   11.21
  -1  -4  -5  168.66   11.53
  -1  -4  -5  162.96   11.49
   1   4   5  179.93   11.41
   1   4   5  165.21   11.39
   1   4   5  175.22   11.16
   1   4   5  165.98   11.58
   1   4   5  161.80   11.45
   1   4   5  182.48   11.54
   1   4   5  160.44   11.25
   1   4   5  170.39   11.43
   1   4   5  155.59   11.25
   1   4   5  181.35   11.63
   1   4   5  161.75   13.14
   1   4   5  163.16   10.95
   1   4   5  162.61   11.51
  -2  -4  -5   49.44    3.83
  -2  -4  -5   50.35    3.85
  -2  -4  -5   50.88    3.75
  -2  -4  -5   49.22    3.74
  -2   4   5   51.40    3.67
  -2   4   5   48.19    3.72
   2  -4   5   59.01    4.18
  -2   4   5   47.50    3.64
  -2   4   5   49.27    4.34
   2  -4   5   62.92    3.83
  -2   4   5   47.91    3.80
  -2   4   5   50.97    3.55
  -2  -4  -5   51.71    3.88
  -2   4   5   47.01    3.72
  -2  -4  -5   53.21    3.83
  -2  -4  -5   52.11    3.64
   2  -4  -5   48.35    4.02
  -2   4  -5   61.77    4.46
  -2   4  -5   57.61    3.56
   2  -4  -5   49.10    3.57
   2  -4  -5   53.86    3.65
   2  -4  -5   54.82    3.73
  -2   4  -5   60.12    3.97
  -2   4  -5   60.73    3.75
   2   4   5   51.42    3.84
   2   4   5   49.83    3.84
   2   4   5   47.69    4.37
  -2   4  -5   59.48    3.67
  -2   4  -5   62.32    3.78
   2  -4  -5   53.07    3.71
   2   4   5   49.30    3.79
  -2   4  -5   62.51    3.67
   2   4   5   48.73    3.85
   2   4   5   49.24    3.69
   2   4   5   52.74    3.73
   2  -4  -5   51.99    3.73
   2   4   5   50.81    3.80
   2  -4  -5   49.24    3.70
   2   4   5   53.32    3.72
   2   4   5   51.11    3.68
   3  -4   5   24.46    1.70
   3  -4   5   22.90    1.70
   3  -4   5   22.87    1.90
   3  -4   5   22.61    1.62
  -3   4  -5   22.27    1.67
  -3   4  -5   23.36    1.76
  -3   4  -5   22.36    1.77
   4   4  -5   30.49    2.29
   4   4  -5   28.77    2.29
   4   4  -5   31.26    2.20
   4   4  -5   28.50    2.32
   4   4  -5   29.35    2.22
   4   4  -5   29.71    2.38
   4   4  -5   29.46    2.20
   4   4  -5   28.68    2.28
   4   4  -5   28.66    2.25
  -4  -4   5   28.42    2.33
  -4  -4   5   31.74    2.26
  -4  -4   5   31.09    2.27
  -4  -4   5   28.18    2.30
  -4  -4   5   28.10    2.30
  -4  -4   5   27.85    2.19
  -4  -4   5   26.66    2.36
  -4  -4   5   31.53    2.39
  -4  -4   5   27.17    2.22
  -4  -4   5   30.76    2.38
  -4  -4   5   29.96    2.29
  -4  -4   5   31.70    2.41
   5  -4   5   51.58    3.76
  -5   4  -5   51.27    3.58
  -5   4  -5   53.32    4.16
  -5   4  -5   49.42    4.57
  -5   4  -5   52.79    3.81
  -6   4   5   42.57    3.04
  -6   4   5   40.53    3.06
  -6   4   5   40.87    3.78
  -6   4   5   45.27    3.24
  -6   4   5   41.26    3.15
  -6   4   5   43.03    3.18
  -6   4   5   43.22    3.62
  -6   4   5   45.33    3.25
  -6   4   5   43.42    3.20
   6  -4  -5   43.31    3.21
   6  -4  -5   44.33    3.20
  -7   4   5   16.48    1.50
  -7   4   5   16.45    1.51
  -7   4   5   18.16    1.57
  -7   4   5   17.43    1.48
  -7   4   5   17.99    1.90
  -7   4   5   16.91    1.45
  -7   4   5   18.39    1.53
  -7   4   5   19.24    1.59
   7  -4  -5   17.29    1.53
   7  -4  -5   16.76    1.50
  -8   4   5    6.23    0.78
  -8   4   5    6.09    1.03
  -8   4   5    5.10    0.76
  -8   4   5    5.16    0.73
  -8   4   5    5.70    0.78
   8  -4  -5    5.20    0.77
   8  -4  -5    4.50    0.74
   0  -5   5  177.92   12.51
   0   5  -5  175.96   12.24
   0  -5   5  189.15   12.41
   0   5  -5  173.16   11.78
   0   5  -5  178.59   12.24
   0  -5   5  192.71   12.50
   0  -5   5  177.11   12.64
   0  -5   5  182.34   12.17
   0   5  -5  191.77   12.67
   0   5  -5  180.13   14.12
   0  -5   5  174.81   12.02
   0  -5   5  177.84   12.49
   0   5  -5  177.08   12.38
   0   5  -5  178.68   12.37
  -1  -5  -5  150.50   10.27
  -1  -5  -5  144.54   10.37
  -1  -5  -5  145.01   10.35
  -1  -5  -5  141.73   10.09
  -1  -5  -5  151.20    9.72
  -1  -5  -5  140.70    9.97
  -1  -5  -5  151.15   10.26
   1   5   5  150.56   10.26
   1   5   5  145.25   10.25
   1   5   5  144.73   11.74
   1   5   5  145.76   10.27
   1   5   5  141.50   10.13
   1   5   5  160.94   10.30
   1   5   5  151.89    9.89
   1   5   5  150.74    9.78
   2  -5   5   52.03    3.45
   2  -5   5   47.58    3.46
   2  -5   5   53.72    3.46
   2  -5   5   49.14    3.55
   2  -5   5   52.15    3.72
   2  -5   5   51.76    3.46
  -2   5  -5   45.73    3.31
  -2   5  -5   48.22    3.71
  -2   5  -5   48.49    3.51
  -2   5  -5   50.75    3.42
  -2   5  -5   46.78    3.47
  -2   5  -5   45.69    3.41
  -2   5  -5   48.80    4.16
  -3   5   5    3.69    0.38
  -3   5   5    3.29    0.37
   3  -5   5    3.07    0.37
  -3   5   5    3.86    0.40
  -3   5   5    4.54    0.42
  -3   5   5    4.25    0.60
   3  -5   5    3.22    0.53
  -3   5   5    3.45    0.40
  -3   5   5    3.24    0.35
   3  -5   5    3.13    0.34
   3  -5   5    3.15    0.34
   3  -5   5    3.26    0.33
   3  -5   5    3.05    0.38
   3  -5   5    3.04    0.32
   3  -5  -5    3.73    0.33
   3  -5  -5    4.12    0.37
  -3   5  -5    3.12    0.38
  -3   5  -5    2.79    0.59
  -3   5  -5    3.49    0.41
  -3   5  -5    2.94    0.48
  -3   5  -5    3.47    0.39
   3  -5  -5    3.73    0.34
   3  -5  -5    4.13    0.36
  -3   5  -5    3.19    0.35
  -3   5  -5    3.01    0.36
   3  -5  -5    3.97    0.34
  -3   5  -5    3.36    0.40
  -5  -5  -5   35.22    3.28
   5   5  -5   48.97    3.28
  -5  -5  -5   37.91    3.28
   5   5  -5   50.92    3.22
  -5  -5  -5   36.92    3.39
   5   5   5   35.17    3.33
  -5  -5   5   48.88    3.51
   5   5   5   35.19    3.28
  -5  -5   5   50.99    3.40
  -5  -5   5   51.31    3.42
   6  -5   5   38.83    2.57
  -6   5   5   31.73    2.47
  -6   5   5   35.52    2.49
   6   5  -5   29.40    2.64
  -6   5   5   32.45    3.05
  -6   5   5   31.29    2.37
   6   5  -5   28.39    2.61
  -6   5   5   33.80    2.37
  -6   5   5   34.32    2.52
  -6   5   5   31.23    2.44
   6   5  -5   28.12    2.50
   6  -5   5   39.13    2.69
  -6   5   5   33.57    2.49
  -6  -5   5   31.61    2.80
  -6   5  -5   34.95    3.28
  -6  -5   5   28.88    2.65
  -6  -5   5   27.13    2.57
  -6  -5   5   27.59    2.74
  -6   5  -5   37.27    2.96
  -6   5  -5   38.32    2.62
  -6  -5   5   27.34    2.45
   6  -5  -5   32.58    2.47
  -6   5  -5   38.57    2.55
  -6   5  -5   33.60    2.39
   6  -5  -5   34.79    2.51
  -6  -5   5   29.33    2.58
  -6  -5   5   30.14    2.68
  -6   5  -5   38.53    2.62
  -7  -5  -5   13.97    1.33
   7   5   5   12.63    1.34
   7   5   5   12.78    1.49
   7   5   5   13.14    1.43
   8   5  -5    2.04    0.65
   8   5  -5    1.90    0.61
   8   5  -5    2.36    0.58
  -8   5   5    1.66    0.46
  -8   5   5    2.57    0.75
  -8   5   5    1.84    0.46
  -8   5   5    1.99    0.47
  -8   5   5    2.05    0.45
   8  -5  -5    2.30    0.50
   8  -5  -5    2.07    0.50
   0   6  -5  116.02    7.83
   0   6  -5  111.10    7.91
   0  -6   5  117.56    7.92
   0   6  -5  112.82    7.55
   0  -6   5  113.75    8.07
   0  -6   5  119.59    8.22
   0  -6   5  113.30    7.98
   0  -6   5  110.82    7.68
   0   6  -5  115.92    7.94
   0  -6   5  115.29    7.99
   0   6  -5  115.37    9.06
   0   6  -5  110.14    7.83
   1   6  -5  113.43    8.68
  -1   6   5  116.91   10.10
   1   6  -5  120.16    8.68
   1  -6   5  144.52    8.80
   1   6  -5  116.03    8.78
  -1   6   5  125.72    8.36
   1  -6   5  145.58    8.94
  -1   6   5  125.81    8.79
  -1   6   5  119.05    8.67
  -1   6   5  119.03    8.76
   1   6  -5  135.95    9.04
   1   6  -5  118.66    8.81
   1  -6  -5  117.12    8.85
   1  -6  -5  115.82    8.50
  -1   6  -5  139.39   10.10
   1  -6  -5  121.38    8.84
  -1  -6   5  121.03    8.79
  -1   6  -5  137.51    8.74
  -1   6  -5  140.44    8.65
  -1  -6   5  117.49    8.52
   1  -6  -5  134.08    8.89
  -1  -6   5  118.38    8.85
  -1   6  -5  142.35    8.64
  -1   6  -5  133.87    8.31
  -1  -6   5  117.60    8.86
  -1  -6   5  130.80    8.64
   1  -6  -5  123.47    8.57
  -1  -6   5  116.49    8.96
   1  -6  -5  131.04    8.73
  -1   6  -5  138.66    8.73
  -2  -6  -5   59.48    4.33
  -2  -6  -5   55.85    4.47
  -2  -6  -5   57.62    4.45
  -2  -6  -5   60.33    4.43
  -2  -6  -5   59.52    4.33
   2   6   5   66.85    4.42
   2   6   5   62.31    4.41
   2   6   5   56.92    5.08
   2   6   5   68.69    4.53
   2   6   5   58.82    4.34
   2   6   5   60.07    4.49
   2   6   5   58.58    4.21
   2   6   5   62.07    4.28
  -3  -6  -5   17.38    1.56
  -3  -6  -5   16.92    1.51
  -3  -6  -5   16.59    1.50
  -3  -6  -5   16.58    1.44
  -3  -6  -5   16.67    1.49
   3   6   5   17.13    1.60
   3   6   5   16.75    1.77
   3   6   5   17.31    1.44
   3   6   5   16.06    1.27
   3   6   5   17.62    1.41
  -4  -6  -5   30.88    2.51
  -4  -6  -5   28.06    2.58
  -4  -6  -5   29.47    2.34
  -4  -6  -5   29.85    2.47
  -4  -6  -5   31.65    2.45
  -4  -6  -5   29.20    2.46
  -4  -6  -5   30.23    2.70
   4   6   5   30.40    2.35
   4   6   5   30.40    2.41
   4   6   5   28.41    2.22
   4   6   5   28.50    2.79
   4   6   5   30.21    2.41
  -5  -6  -5   84.16    5.05
  -5   6   5   59.79    4.75
  -5  -6  -5   85.11    5.31
  -5   6   5   61.62    4.78
  -5  -6  -5   84.53    5.23
  -5   6   5   59.81    4.79
  -5   6   5   62.32    4.57
  -5   6   5   62.78    4.81
  -5   6   5   59.93    5.73
   5  -6  -5   65.98    4.88
   5   6   5   81.39    5.98
   5  -6  -5   65.52    4.83
   6   6  -5   63.59    4.43
  -6   6   5   55.13    4.31
  -6   6   5   55.75    5.24
  -6   6   5   53.85    4.13
   6   6  -5   66.19    4.56
  -6   6   5   59.08    4.34
  -6   6   5   57.37    4.35
  -6   6   5   57.36    4.12
   6   6  -5   66.86    4.64
   6   6  -5   67.05    4.65
  -6   6   5   55.35    4.30
  -6  -6   5   65.13    4.56
   6  -6  -5   60.29    4.42
  -6  -6   5   65.11    4.63
  -6  -6   5   63.36    4.67
   6  -6  -5   58.28    4.37
  -6  -6   5   59.38    4.80
  -6  -6   5   69.01    4.75
  -6  -6   5   62.88    4.44
   7  -6   5   34.31    2.61
   7  -6   5   37.09    2.78
  -7  -6  -5   27.31    2.67
  -7   6  -5   32.71    2.64
  -7   6  -5   32.28    3.38
   7   6   5   31.36    2.88
  -7   6  -5   38.73    2.63
   7   6   5   28.43    2.71
  -7   6  -5   32.79    2.44
  -7   6  -5   34.99    2.59
  -7   6  -5   32.69    2.60
  -8   6   5   13.37    1.20
  -8   6   5   13.95    1.23
  -8   6   5   13.71    1.78
  -8   6   5   14.11    1.32
  -8   6   5   14.81    1.29
   8  -6  -5   13.45    1.34
   0   7  -5  138.37    9.37
   0   7  -5  136.37   10.82
   0  -7   5  143.62    9.55
   0  -7  -5  104.73    9.47
   0  -7   5  145.76    9.46
   0  -7   5  143.23    9.55
   0  -7   5  141.85    9.19
   0  -7   5  143.88    9.66
   0   7  -5  133.36    9.46
   1  -7   5   65.33    4.41
   1  -7   5   64.70    4.64
   1  -7   5   67.06    4.59
   1  -7   5   65.54    4.55
   1  -7   5   69.13    4.59
   1  -7   5   68.81    4.79
  -1   7  -5   60.94    4.48
  -1   7  -5   63.99    4.35
  -1   7  -5   64.13    4.49
  -1   7  -5   62.32    5.31
  -1   7  -5   63.05    4.56
  -1   7  -5   60.40    4.53
  -2   7   5   41.56    2.94
  -2   7   5   40.70    2.83
  -2   7   5   41.45    2.98
   2  -7   5   43.42    2.88
   2  -7   5   43.63    2.89
  -2   7   5   39.43    3.52
  -2   7   5   39.74    2.98
  -2   7   5   38.47    2.92
  -2   7  -5   39.72    2.77
  -2   7  -5   40.97    2.93
  -2   7  -5   42.55    2.88
   2  -7  -5   37.17    2.84
  -2   7  -5   43.15    2.89
   2  -7  -5   38.39    2.95
   2  -7  -5   40.44    2.95
  -2   7  -5   41.37    3.56
  -2   7  -5   41.89    2.92
   3   7  -5    2.60    0.43
   3   7  -5    2.64    0.50
   3   7  -5    2.71    0.47
   3   7  -5    3.02    0.56
  -3  -7   5    2.61    0.45
   3   7   5    1.54    0.53
  -3  -7   5    3.10    0.54
  -3  -7   5    2.68    0.47
  -3  -7   5    3.43    0.50
  -3  -7   5    3.26    0.45
  -3  -7   5    2.51    0.46
  -3  -7   5    2.98    0.43
  -5  -7  -5   27.14    2.30
   5   7  -5   29.67    2.21
   5   7  -5   31.00    2.32
   5   7  -5   28.63    2.28
   5  -7   5   29.33    2.11
  -5  -7  -5   27.48    2.61
  -5  -7  -5   29.41    2.49
  -5  -7  -5   31.16    2.49
   5   7  -5   28.68    2.13
  -5  -7  -5   27.61    2.43
  -5  -7   5   29.00    2.39
  -5   7  -5   26.38    1.99
   5  -7  -5   22.10    2.09
  -5   7  -5   27.12    2.80
  -5  -7   5   31.15    2.47
  -5  -7   5   31.15    2.40
  -5  -7   5   26.83    2.39
   5   7   5   28.12    2.83
  -5   7  -5   26.84    2.08
  -5   7  -5   27.76    2.15
   5   7   5   27.24    2.14
  -5  -7   5   27.28    2.47
   5   7   5   28.71    2.31
  -5   7  -5   30.65    2.56
  -5  -7   5   28.65    2.41
  -5  -7   5   26.53    2.22
  -5   7  -5   28.03    2.11
  -5   7  -5   30.30    2.11
   6   7  -5   38.28    2.73
  -6   7   5   35.40    2.68
  -6   7   5   33.38    2.51
  -6   7   5   31.70    3.33
  -6   7   5   36.50    2.64
  -6   7   5   33.07    2.63
  -6   7   5   34.80    2.62
  -6  -7  -5   27.64    3.14
  -6  -7  -5   28.76    3.02
  -6   7   5   34.88    2.50
   6   7  -5   40.44    2.85
  -6  -7   5   40.52    3.00
  -6  -7   5   39.61    3.00
  -6  -7   5   40.38    2.85
  -6  -7   5   40.12    3.04
  -6  -7   5   40.04    3.19
   6  -7  -5   34.28    2.71
  -6  -7   5   42.46    3.11
  -7   7   5   25.07    1.98
  -7   7   5   26.49    1.91
  -7   7   5   22.65    2.54
  -7   7   5   24.29    1.81
  -7   7   5   24.71    1.80
  -7   7   5   24.87    1.89
  -7   7   5   23.15    1.93
   7  -7  -5   24.94    2.00
   1  -8   5   74.96    5.70
   1   8  -5   88.59    5.75
   1   8  -5   88.51    5.74
   1   8  -5   89.26    5.82
   1  -8   5   75.53    5.69
   1  -8   5   76.08    5.49
  -1   8  -5   74.20    5.59
  -1  -8   5   88.84    5.91
  -1   8  -5   76.64    5.69
  -1  -8   5   87.45    5.83
  -1  -8   5   84.89    5.61
  -1  -8   5   93.53    5.80
  -1   8  -5   70.01    5.64
  -1   8  -5   73.53    6.61
  -1  -8   5   86.14    5.82
  -1   8  -5   72.19    5.60
  -2  -8  -5   19.04    1.66
  -2  -8  -5   17.84    1.63
  -2  -8  -5   17.93    1.60
  -2  -8  -5   19.86    1.61
  -2  -8  -5   18.38    1.67
  -2  -8  -5   17.53    1.71
   2   8   5   18.45    1.73
   2   8   5   17.94    1.65
   2   8   5   18.71    1.98
  -3   8   5    9.27    0.81
  -3   8   5    9.91    1.14
  -3   8   5    9.33    0.81
  -3   8   5    9.07    0.80
  -3   8   5    9.21    0.82
  -3   8   5    9.24    0.77
   3  -8  -5    9.24    0.78
   3  -8  -5    9.23    0.78
   3  -8  -5    9.95    0.80
  -5   8  -5   30.27    2.26
  -5   8  -5   27.56    2.11
  -5   8  -5   28.05    2.03
  -5   8  -5   31.04    2.19
  -5   8  -5   28.35    2.94
  -5   8  -5   33.26    2.16
  -6   8   5   32.55    2.60
  -6   8   5   34.37    2.83
  -6   8   5   32.47    2.79
  -6   8   5   33.77    2.60
   6   8  -5   42.28    2.95
  -6   8  -5   38.51    3.76
  -6   8  -5   44.68    2.89
  -6   8  -5   43.79    2.79
  -6  -8   5   45.93    3.49
  -6  -8   5   43.16    3.26
  -6  -8   5   45.32    3.32
  -6   8  -5   36.81    2.63
   7   8  -5   20.45    1.79
  -7  -8   5   21.72    2.02
  -7  -8   5   21.31    2.09
   1   9  -5   44.48    3.67
   1  -9   5   57.40    3.64
   1  -9   5   58.52    3.52
   1   9  -5   48.00    3.69
   1   9  -5   45.69    3.71
   1   9  -5   47.55    3.75
  -1   9  -5   54.02    3.61
  -1  -9   5   42.38    3.68
  -1   9  -5   59.31    3.69
  -1  -9   5   43.53    3.70
  -1  -9   5   43.56    3.56
  -1   9  -5   54.42    3.62
  -1   9  -5   54.98    3.59
  -1  -9   5   46.52    3.69
   2  -9   5   13.80    1.09
   2  -9   5   14.67    1.10
   2  -9   5   15.42    1.15
  -2   9  -5   13.71    1.11
  -2   9  -5   13.14    1.53
  -2   9  -5   13.64    1.12
  -2   9  -5   13.86    1.13
  -2   9  -5   13.16    1.11
  -3   9   5   12.33    1.05
  -3  -9  -5   13.17    1.36
  -3   9   5   12.41    1.06
  -3   9   5   12.64    1.07
  -3   9   5   12.59    1.01
  -3  -9  -5   12.03    1.32
  -3   9   5   12.32    1.07
  -3   9   5   14.35    1.46
  -3  -9  -5   13.30    1.39
   3   9   5   15.50    1.71
   3  -9  -5   12.29    1.03
   3  -9  -5   12.75    1.06
  -4  -9   5    9.98    1.05
  -4  -9   5    9.22    1.08
  -4  -9   5    9.23    1.10
  -4  -9   5    9.00    1.08
  -5  -9  -5   18.53    1.87
  -5  -9  -5   22.39    2.03
  -5  -9  -5   20.17    1.89
  -5  -9   5   17.54    1.79
   5   9   5   20.20    2.25
  -5  -9   5   17.16    1.74
  -5  -9   5   16.83    1.83
  -5  -9   5   17.02    1.64
  -5  -9   5   16.44    1.76
  -6   9   5    5.90    0.63
  -6   9   5    5.40    0.59
  -1  10   5   24.42    1.76
   1 -10   5   20.20    1.68
  -1  10   5   25.40    1.84
   1 -10   5   20.82    1.68
   1  10  -5   18.99    1.77
  -1  10   5   23.90    1.83
   1  10  -5   20.12    1.80
  -1  10   5   25.94    2.25
   1 -10   5   20.35    1.61
   1  10  -5   17.44    1.76
  -1  10   5   23.64    1.78
   1 -10  -5   25.06    1.83
   1 -10  -5   25.57    1.81
  -1  10  -5   18.74    1.64
  -1  10  -5   20.20    1.69
   1 -10  -5   24.55    1.77
  -1  10  -5   20.15    1.68
  -1  10  -5   20.26    1.67
  -1 -10   5   18.08    1.70
  -1 -10   5   18.93    1.77
  -1 -10   5   18.68    1.77
  -2  10   5    8.15    0.83
  -2  10   5    7.94    0.82
  -2  10   5    8.14    0.82
   2 -10   5    7.98    0.75
  -2  10   5    8.13    0.79
   2 -10   5    8.38    0.72
  -2  10   5    8.32    0.84
   2 -10  -5    9.03    0.85
  -2  10  -5    8.18    0.77
  -2  10  -5    7.32    1.07
   2 -10  -5    7.42    0.81
   2 -10  -5    7.20    0.77
  -2  10  -5    8.04    0.72
  -2  10  -5    8.16    0.73
  -2  10  -5    8.08    0.74
  -3  10   5    2.95    0.44
  -3  10   5    2.50    0.38
  -3  10   5    2.50    0.37
  -3 -10  -5    4.18    0.72
  -3  10   5    2.21    0.35
  -3 -10  -5    3.72    0.69
  -3  10   5    2.11    0.39
   3 -10  -5    2.27    0.39
   3  10   5    4.60    1.00
   3 -10  -5    2.56    0.42
  -4 -10   5    4.07    0.71
  -4 -10   5    3.50    0.72
  -4 -10   5    4.66    0.78
  -5  10   5    8.23    0.79
  -5  10   5    8.36    0.83
  -5 -10  -5    8.84    1.21
  -5 -10  -5   10.89    1.36
   0  11  -5   28.94    2.25
   0  11  -5   26.43    2.22
   0 -11   5   27.33    2.21
   0  11  -5   30.13    2.28
   0  11  -5   25.39    2.18
   0 -11   5   28.19    2.23
   1 -11   5    8.30    0.82
   1 -11   5    7.47    0.81
  -1  11  -5    7.83    0.78
  -1  11  -5    8.17    0.84
  -1  11  -5    7.53    0.82
  -1  11  -5    8.73    0.84
   2  11  -5    9.41    1.09
   2  11  -5    9.13    1.08
  -2 -11   5    8.39    1.02
  -2 -11   5    8.83    1.04
   3  11  -5    1.44    0.54
  -3  11   5    1.90    0.31
  -3  11   5    1.68    0.36
  -3 -11  -5    1.45    0.52
  -3  11   5    1.80    0.31
  -3  11   5    1.68    0.36
  -3  11   5    1.75    0.29
  -3 -11  -5    1.33    0.55
  -3 -11   5    1.42    0.50
  -3 -11   5    1.63    0.50
   3  11   5    0.93    0.79
  -3 -11   5    1.17    0.49
  -4  11  -5    4.20    0.94
  -4 -11   5    3.44    0.72
  -4 -11   5    3.56    0.74
  -4  11  -5    4.02    0.47
  -4 -11   5    3.44    0.73
  -4  11  -5    4.54    0.48
  -5  11   5   17.24    1.40
  -5  11   5   18.02    1.37
  -5 -11   5   14.65    1.76
  -5 -11   5   16.08    1.76
   0  12   5   17.38    1.70
   0 -12  -5   16.61    1.64
   0  12   5   17.78    1.69
   0 -12  -5   17.38    1.64
   1  12  -5   40.53    2.87
   1 -12   5   30.32    2.62
   1  12  -5   38.82    2.82
  -1 -12   5   37.37    2.82
  -1  12  -5   32.09    2.64
  -1  12  -5   30.63    2.56
  -1  12  -5   30.68    2.62
  -1 -12   5   38.41    2.84
  -1  12  -5   32.01    2.59
   2  12  -5   12.54    1.46
  -2  12  -5   16.74    1.33
  -2  12  -5   16.43    1.31
  -2 -12   5   11.83    1.43
  -2 -12   5   11.92    1.41
  -2  12  -5   16.79    1.19
  -3  12  -5    2.19    0.37
  -3 -12   5    2.02    0.59
  -3  12  -5    1.74    0.34
  -3 -12   5    2.72    0.66
  -4 -12   5    5.63    0.98
   0 -13   5   14.13    1.39
   0 -13   5   13.31    1.36
   0  13  -5   13.75    1.38
   1  13  -5    6.44    0.97
   1 -13   5    8.57    0.95
  -1  13  -5    8.67    0.84
  -1 -13   5    5.52    0.93
  -1  13  -5    8.71    0.95
   0   0  -6  113.31    7.50
   0   0  -6  121.16    8.08
   0   0   6  121.52    7.97
   0   0  -6  113.79    7.88
   0   0  -6  115.45    7.97
   0   0   6  113.57    7.90
   0   0  -6  116.40    7.89
   0   0  -6  114.56    8.97
   0   0  -6  111.71    7.88
   0   0   6  112.60    7.86
   0   0  -6  108.59    7.75
   0   0   6  116.75    8.99
   0   0   6  111.95    7.87
   0   0  -6  112.39    7.95
   0   0   6  108.89    8.06
   0   0  -6  116.30    7.75
   0   0   6  106.68    7.96
   0   0  -6  116.14    7.78
   0   0   6  112.70    7.79
   0   0   6  121.73    7.78
   0   0   6  108.10    7.75
   0   0   6  112.67    7.97
   0   0   6  111.96    7.50
   2   0  -6  117.17    9.46
  -2   0   6  119.97   10.72
  -2   0  -6  146.57    9.25
  -2   0  -6  159.37    9.34
   2   0  -6  127.07    9.26
  -2   0  -6  152.93    9.44
   2   0   6  154.87    9.36
  -2   0   6  128.22    9.50
  -2   0   6  120.84    9.60
  -2   0   6  120.08    9.24
  -2   0   6  124.10    9.47
  -2   0   6  123.00    9.27
   2   0  -6  124.84    9.11
   2   0   6  150.01    9.44
  -2   0   6  125.48    9.38
  -2   0   6  121.89    9.38
   2   0  -6  125.50    9.39
  -2   0  -6  152.88    9.93
   2   0   6  156.78   10.77
   2   0   6  153.56    9.61
   2   0  -6  126.52    9.42
   2   0  -6  126.44    9.26
   2   0  -6  126.46    9.81
   2   0   6  158.04    9.01
   2   0   6  155.23    9.54
  -2   0   6  119.20    9.11
  -2   0  -6  159.31    9.01
  -2   0   6  131.90    8.94
  -2   0   6  125.82    9.30
   2   0   6  161.85    9.74
   2   0  -6  126.88    9.61
   2   0  -6  127.36    9.38
   2   0  -6  132.66    9.29
   2   0  -6  122.42    9.49
  -2   0  -6  163.02    9.57
  -2   0  -6  152.30    9.38
  -3   0   6  265.37   17.41
   3   0  -6  267.52   18.08
  -3   0   6  259.07   17.43
  -3   0   6  276.05   18.31
  -3   0   6  260.58   19.14
  -3   0   6  265.01   18.04
  -3   0   6  274.69   18.14
  -3   0   6  265.22   18.31
  -3   0   6  268.28   18.30
  -3   0   6  269.13   18.49
   3   0  -6  266.61   18.08
   3   0  -6  257.01   18.52
   3   0  -6  279.45   19.18
   3   0  -6  286.65   18.39
   3   0  -6  271.36   18.28
  -3   0   6  264.43   18.72
  -3   0   6  265.30   17.79
   3   0  -6  276.32   17.80
   3   0  -6  253.32   17.41
  -3   0   6  253.13   18.04
   3   0  -6  255.96   18.50
  -3   0   6  289.28   18.31
  -3   0   6  270.17   18.11
   4   0  -6   38.42    2.77
  -4   0   6   35.11    2.90
  -4   0   6   33.75    2.76
   4   0  -6   41.70    2.71
   4   0  -6   37.69    2.95
   4   0  -6   37.46    2.68
  -4   0   6   38.04    2.73
  -4   0   6   34.99    2.63
  -4   0   6   38.24    2.81
   4   0  -6   36.84    2.77
   4   0  -6   37.82    2.76
  -4   0   6   39.16    2.77
  -4   0   6   36.87    2.63
  -4   0   6   36.32    3.05
  -4   0   6   36.10    2.66
  -4   0   6   35.02    2.83
  -4   0   6   38.33    2.61
  -4   0   6   40.73    2.73
   4   0  -6   35.66    2.77
   5   0  -6  147.59    9.90
  -5   0   6  139.35   11.20
  -5   0   6  136.57   10.14
  -5   0   6  137.42    9.48
  -5   0   6  148.93    9.99
  -5   0   6  147.41    9.47
   5   0  -6  139.95   10.00
  -5   0   6  132.87   10.39
   5   0  -6  141.89    9.76
  -5   0   6  143.56    9.81
  -5   0   6  136.81    9.92
   5   0  -6  133.47   10.01
  -5   0   6  142.85    9.84
   5   0  -6  139.94    9.92
  -5   0   6  147.20    9.89
   5   0  -6  158.76    9.68
   6   0  -6   39.16    2.73
  -6   0   6   38.17    2.75
  -6   0   6   34.71    2.82
   6   0  -6   39.44    2.80
  -6   0  -6   32.35    3.12
  -6   0   6   40.40    2.92
   6   0   6   35.82    2.84
  -6   0   6   36.13    2.87
   6   0   6   31.42    2.90
  -6   0  -6   32.94    2.98
   6   0   6   30.91    2.80
  -6   0  -6   32.92    2.94
   6   0  -6   36.65    2.80
   6   0  -6   37.98    2.82
  -6   0   6   37.86    3.10
  -6   0   6   38.64    3.03
  -6   0   6   37.54    2.78
  -6   0  -6   36.91    2.77
  -6   0  -6   30.44    3.39
   8   0  -6    9.33    1.14
  -8   0   6   10.86    1.25
   8   0  -6   10.53    1.17
  -8   0   6   10.93    1.26
   8   0  -6   10.28    1.16
   9   0  -6   40.75    3.31
   9   0  -6   38.86    3.32
   0  -1  -6  412.49   27.31
   0   1  -6  388.53   31.09
   0  -1  -6  427.82   27.33
   0   1  -6  379.63   27.63
   0  -1   6  403.58   27.64
   0  -1  -6  441.81   27.08
   0  -1   6  403.96   27.66
   0  -1  -6  409.82   27.05
   0  -1  -6  429.95   27.45
   0   1  -6  384.87   27.40
   0   1   6  423.97   27.08
   0  -1  -6  411.74   27.69
   0  -1  -6  453.35   27.70
   0   1  -6  373.76   27.64
   0   1  -6  373.16   27.01
   0  -1   6  374.13   27.94
   0  -1   6  383.06   27.43
   0  -1   6  378.38   27.01
   0   1   6  409.74   27.98
   0   1   6  420.40   31.19
   0  -1  -6  452.72   27.05
   0   1   6  416.60   27.68
   0   1  -6  365.82   27.28
   0  -1   6  376.50   27.66
   0   1   6  408.40   27.67
   0   1   6  384.08   27.30
   0  -1  -6  432.48   27.71
   0   1  -6  371.66   27.03
   0   1  -6  359.71   25.99
   0   1   6  406.51   26.02
   0   1   6  403.47   27.05
   0  -1   6  378.78   31.10
   0  -1   6  377.29   27.04
   0   1  -6  368.03   26.98
   0   1   6  436.18   27.04
   0  -1  -6  441.66   27.98
   0   1  -6  407.99   27.94
   0  -1   6  408.09   27.04
   0  -1   6  384.20   27.30
   0   1   6  409.53   27.43
   0  -1   6  395.70   27.29
   1  -1   6   98.31    7.36
   1  -1   6   97.56    7.49
   1  -1   6   99.45    7.39
   1  -1   6  116.92    7.20
   1  -1   6  117.10    7.39
   1  -1   6  103.97    6.96
   1  -1   6  109.07    7.31
   1  -1   6  101.08    7.18
   1  -1   6   95.78    7.29
   1  -1   6  103.63    7.29
   1  -1   6  102.56    8.30
  -1   1  -6  105.26    7.35
  -1   1  -6  113.08    7.22
  -1   1  -6  115.81    7.27
  -1   1  -6  107.47    7.27
  -1   1  -6  107.57    7.33
  -1   1  -6  101.40    7.22
  -1   1  -6  109.42    7.34
  -1   1  -6  109.70    6.97
  -1   1  -6  108.29    7.51
  -1   1  -6  104.94    7.34
  -1   1  -6  100.66    7.60
  -1   1  -6   97.71    7.13
  -1   1  -6  102.07    7.14
  -1   1  -6  106.36    7.32
  -2  -1  -6   66.34    4.48
  -2   1   6   63.58    4.62
  -2  -1  -6   63.57    4.59
  -2  -1  -6   62.75    4.55
  -2   1   6   63.97    4.46
  -2   1   6   64.67    4.44
  -2  -1  -6   61.40    4.34
  -2   1   6   68.36    4.30
  -2   1   6   66.22    4.44
  -2   1   6   66.38    4.52
  -2   1   6   61.93    5.19
  -2  -1  -6   62.64    4.56
  -2   1   6   67.11    4.54
  -2   1   6   67.80    4.52
  -2   1   6   67.27    4.46
  -2  -1  -6   58.32    4.44
  -2   1   6   63.72    4.34
  -2   1   6   66.46    4.51
  -2  -1  -6   64.51    4.54
  -2  -1  -6   62.58    4.62
   2  -1  -6   68.18    4.59
   2  -1  -6   60.97    4.52
   2   1   6   62.35    4.64
   2  -1  -6   64.39    4.51
   2  -1  -6   68.77    4.43
   2  -1  -6   62.53    4.56
   2  -1  -6   70.01    4.45
   2   1   6   57.63    4.53
   2   1   6   60.08    5.19
   2   1   6   60.66    4.59
   2  -1  -6   67.02    4.53
   2   1   6   60.76    4.50
   2   1   6   61.64    4.71
   2   1   6   67.45    4.50
   2   1   6   65.93    4.52
   2   1   6   58.80    4.56
   2  -1  -6   67.11    4.37
   2  -1  -6   65.92    4.75
   2   1   6   65.48    4.59
   2  -1  -6   63.33    4.50
  -3   1   6   91.42    6.41
  -3   1   6   94.79    6.41
  -3   1   6   89.47    6.31
  -3   1   6   88.81    6.40
  -3   1   6   90.82    6.74
  -3   1   6   90.43    6.34
  -3   1   6   89.17    7.38
  -3   1   6   89.94    6.09
  -3   1   6   89.44    6.55
   3  -1  -6   91.60    6.28
   3  -1  -6   96.38    6.40
   3  -1  -6   95.65    6.30
   3  -1  -6   94.53    6.21
   3  -1  -6   97.02    6.78
   3  -1  -6   86.64    6.08
   3  -1  -6   93.90    6.42
   3  -1  -6   88.85    6.46
   3  -1  -6   87.58    6.44
   3  -1  -6   97.98    6.50
   4   1  -6   71.39    4.56
   4   1  -6   71.07    4.94
   4   1  -6   63.56    4.66
   4   1  -6   62.07    4.69
   4   1  -6   62.37    4.71
   4   1  -6   65.55    4.67
   4   1  -6   64.30    4.57
  -4  -1   6   65.81    4.68
  -4  -1   6   65.54    4.68
  -4  -1   6   58.49    4.77
  -4  -1   6   67.33    4.73
  -4  -1   6   65.31    4.51
  -4  -1   6   64.51    4.70
  -4  -1   6   62.95    4.49
  -4  -1   6   68.55    4.63
  -4  -1   6   63.01    5.17
  -4  -1   6   66.19    4.52
  -4  -1   6   65.98    4.50
  -4  -1   6   65.91    4.47
  -4  -1   6   61.32    4.88
  -4  -1   6   67.89    4.65
  -4  -1   6   67.40    4.62
   5   1  -6   31.22    2.43
   5   1  -6   33.60    2.39
   5   1  -6   31.20    2.41
   5   1  -6   30.11    2.34
   5   1  -6   29.52    2.43
  -5  -1   6   31.07    2.47
  -5  -1   6   30.62    2.27
  -5  -1   6   31.50    2.38
  -5  -1   6   31.65    2.41
  -5  -1   6   28.10    2.47
  -5  -1   6   33.52    2.40
  -5  -1   6   31.87    2.32
  -5  -1   6   29.69    2.56
  -5  -1   6   32.16    2.52
  -5  -1   6   32.78    2.36
  -5  -1   6   33.46    2.39
  -5  -1   6   30.95    2.62
  -6  -1  -6   39.42    3.10
   6  -1   6   33.22    2.93
  -6  -1  -6   38.47    3.12
   6  -1   6   35.13    2.87
  -6  -1  -6   40.85    3.32
   6  -1   6   37.79    2.87
   6   1   6   37.46    2.90
  -6   1  -6   36.88    2.78
  -6   1  -6   36.77    2.93
   6   1   6   38.63    2.89
  -6   1  -6   34.68    3.00
  -6   1  -6   34.29    2.95
  -6   1  -6   31.68    3.43
   6   1   6   37.47    3.01
  -6   1  -6   33.04    3.15
   6   1   6   38.10    2.93
  -7   1   6   42.61    3.97
  -7   1   6   43.55    3.51
  -7   1   6   43.12    3.81
   7  -1   6   53.57    3.83
   7  -1   6   53.00    3.69
  -7   1   6   41.49    3.55
  -7   1   6   42.65    3.61
  -7   1   6   43.25    3.42
   7  -1   6   55.22    3.69
  -7   1  -6   50.50    4.48
   7  -1  -6   43.89    3.55
   7  -1  -6   39.77    3.52
  -7   1  -6   51.69    3.84
  -7   1  -6   52.78    3.83
   7  -1  -6   43.80    3.52
  -8   1   6   25.30    2.16
  -8   1   6   26.02    2.28
  -8   1   6   25.59    2.26
   8  -1  -6   24.50    2.19
   8  -1  -6   24.70    2.21
   8  -1  -6   26.71    2.22
   9   1  -6   17.48    1.73
   9   1  -6   15.22    1.68
  -1   2   6  198.32   13.64
  -1   2   6  197.17   13.78
  -1   2   6  209.79   13.14
  -1   2   6  203.82   13.89
  -1   2   6  203.79   13.64
  -1   2   6  200.53   13.79
  -1   2   6  195.19   13.36
  -1   2   6  191.08   14.11
  -1   2   6  197.45   15.77
  -1   2   6  209.54   13.39
  -1   2   6  204.22   13.78
  -1   2   6  208.71   13.92
   1  -2  -6  192.48   13.59
   1  -2  -6  198.65   14.11
   1  -2  -6  198.23   13.96
   1  -2  -6  199.05   13.81
   1  -2  -6  189.80   13.93
   1  -2  -6  202.66   13.93
   1  -2  -6  205.88   13.78
   1  -2  -6  220.26   13.98
   1  -2  -6  193.31   13.77
   1  -2  -6  209.52   13.62
   2  -2   6   29.46    2.35
   2  -2   6   33.81    2.33
   2  -2   6   31.27    2.29
   2  -2   6   34.33    2.38
   2  -2   6   31.05    2.31
   2  -2   6   34.30    2.35
   2  -2   6   34.44    2.25
   2  -2   6   30.22    2.61
   2  -2   6   30.77    2.41
   2  -2   6   31.56    2.25
  -2   2  -6   28.77    2.34
  -2   2  -6   32.41    2.35
  -2   2  -6   31.36    2.27
  -2   2  -6   31.32    2.23
  -2   2  -6   31.12    2.46
  -2   2  -6   31.04    2.31
  -2   2  -6   32.09    2.42
  -3  -2  -6   67.44    4.85
  -3  -2  -6   67.66    4.56
  -3  -2  -6   60.04    4.62
  -3  -2  -6   65.09    4.77
  -3  -2  -6   68.26    4.80
  -3  -2  -6   65.93    4.76
  -3  -2  -6   66.45    4.67
  -3  -2  -6   66.96    4.80
  -3  -2  -6   64.21    4.82
  -3  -2  -6   65.15    5.08
  -3  -2  -6   70.89    4.72
   3   2   6   65.57    4.82
   3   2   6   74.38    4.75
   3   2   6   72.96    4.69
   3   2   6   62.40    4.71
   3   2   6   62.59    4.73
   3   2   6   64.49    4.79
   3   2   6   63.33    4.84
   3   2   6   70.15    4.61
  -4   2   6   14.61    1.25
  -4   2   6   14.83    1.24
  -4   2   6   14.65    1.26
  -4   2   6   14.59    1.41
  -4   2   6   13.83    1.19
  -4   2   6   14.41    1.21
  -4   2   6   14.76    1.17
  -4   2   6   15.53    1.40
  -4   2   6   14.72    1.19
   4  -2  -6   15.22    1.24
   4  -2  -6   15.48    1.15
   4  -2  -6   16.23    1.27
   4  -2  -6   14.99    1.17
   4  -2  -6   16.14    1.23
   4  -2  -6   14.97    1.21
   5   2  -6   48.97    3.72
   5   2  -6   49.75    3.64
   5   2  -6   48.06    3.76
   5   2  -6   49.42    3.76
  -5  -2   6   52.88    3.76
  -5  -2   6   49.51    3.79
  -5  -2   6   50.72    3.70
  -5  -2   6   51.17    3.62
  -5  -2   6   48.85    3.54
  -5  -2   6   53.34    3.59
  -5  -2   6   47.63    3.85
  -5  -2   6   50.42    3.61
  -5  -2   6   50.34    4.06
  -5  -2   6   51.75    3.67
  -5  -2   6   52.55    3.75
  -5  -2   6   49.62    3.92
  -5  -2   6   52.41    3.66
  -6   2   6   80.96    4.94
   6   2  -6   58.40    4.93
   6   2  -6   58.40    4.92
  -6   2   6   80.01    4.74
   6   2  -6   61.55    4.78
  -6   2   6   83.35    5.64
  -6  -2   6   64.99    4.75
   6  -2  -6   82.45    4.97
  -6  -2   6   61.33    5.39
  -6  -2   6   61.97    4.97
  -6  -2   6   61.87    4.57
  -6  -2   6   62.20    4.86
  -6  -2   6   60.78    5.15
  -6  -2   6   61.72    4.75
   7  -2   6   24.04    2.05
   7  -2   6   24.62    2.07
   7  -2   6   24.05    2.16
  -7   2  -6   21.42    2.57
  -7   2  -6   22.39    2.12
  -7   2  -6   24.66    2.15
  -7   2  -6   23.64    1.97
  -7   2  -6   22.50    2.13
  -9   2   6   13.24    1.36
  -9   2   6   12.87    1.44
   9  -2  -6   11.70    1.36
   1   3  -6  188.04   12.69
   1   3  -6  202.03   13.34
  -1  -3  -6  174.03   13.54
   1   3  -6  188.18   13.13
   1   3  -6  196.40   13.19
   1   3  -6  213.31   15.16
   1   3  -6  210.71   15.13
   1   3  -6  208.60   13.66
   1  -3   6  217.56   13.32
   1   3  -6  204.63   13.20
   1   3  -6  193.41   13.32
   1   3  -6  202.20   13.32
   1   3  -6  194.69   13.34
   1   3  -6  205.02   13.46
  -1  -3  -6  177.21   13.21
   1   3  -6  195.78   13.48
   1   3   6  169.75   12.73
  -1  -3   6  217.42   13.50
  -1  -3   6  206.99   13.18
   1   3   6  169.84   13.37
   1   3   6  172.63   13.51
   1   3   6  173.94   13.16
  -1  -3   6  194.29   13.38
  -1  -3   6  209.61   13.34
  -1  -3   6  195.99   13.49
  -1  -3   6  196.58   13.49
  -1  -3   6  192.31   13.63
   1   3   6  175.44   13.39
  -1  -3   6  199.62   13.31
  -1  -3   6  201.86   12.67
   1   3   6  169.21   12.98
  -1  -3   6  195.88   12.97
  -1  -3   6  204.04   13.16
   2  -3   6  106.29    7.77
   2  -3   6  107.72    7.74
   2  -3   6  121.43    7.76
   2  -3   6  114.84    8.07
   2  -3   6  116.69    7.77
   2  -3   6  115.79    7.67
   2  -3   6  105.99    8.71
   2  -3   6  120.46    7.55
   2  -3   6  108.65    7.53
  -2   3  -6  114.03    7.90
  -2   3  -6  105.29    8.90
  -2   3  -6  106.27    8.07
  -2   3  -6  105.31    7.72
  -2   3  -6  113.65    7.72
  -2   3  -6  105.84    7.59
   3  -3   6   80.78    5.99
   3  -3   6   85.28    5.90
   3  -3   6   85.15    6.20
   3  -3   6   93.96    5.98
   3  -3   6   83.92    5.72
   3  -3   6   80.49    5.94
   3  -3   6   81.03    6.62
   3  -3   6   92.63    5.90
   3  -3   6   87.43    5.83
  -3   3  -6   79.19    6.86
  -3   3  -6   78.07    6.20
  -3   3  -6   88.28    5.80
  -3   3  -6   77.19    5.80
  -3   3  -6   76.94    5.57
  -3   3  -6   83.19    5.91
  -3   3  -6   81.18    5.86
  -3   3  -6   86.78    6.04
   4  -3   6   44.46    2.83
  -4   3   6   35.64    3.29
  -4   3   6   35.47    2.83
  -4   3   6   35.21    2.84
  -4   3   6   36.04    2.89
   4  -3   6   41.62    2.97
   4  -3   6   40.94    2.89
  -4   3   6   39.13    2.72
   4  -3   6   41.74    2.85
  -4   3   6   34.16    2.77
  -4   3   6   36.81    2.81
  -4   3   6   33.79    2.69
  -4   3  -6   43.72    2.86
   4  -3  -6   38.05    2.74
  -4   3  -6   39.85    2.93
  -4   3  -6   39.81    2.75
   4  -3  -6   42.33    2.86
  -4   3  -6   39.89    2.89
  -4   3  -6   40.45    3.55
   4  -3  -6   37.40    2.83
   4  -3  -6   36.43    2.86
  -4   3  -6   38.34    3.14
   4  -3  -6   38.38    2.82
  -4   3  -6   41.06    2.90
   4  -3  -6   39.79    2.73
  -4   3  -6   43.99    3.01
  -5   3   6   70.32    4.95
  -5   3   6   71.41    5.10
  -5   3   6   71.11    4.75
  -5   3   6   70.56    5.41
  -5   3   6   68.30    5.75
  -5   3   6   68.82    4.92
  -5   3   6   69.72    4.99
  -5   3   6   69.91    5.02
  -5   3   6   64.31    4.75
   5  -3  -6   71.40    5.04
   5  -3  -6   69.00    5.00
   5  -3  -6   74.26    5.00
  -6   3   6   40.19    3.01
  -6   3   6   41.81    3.33
  -6   3   6   39.20    3.00
  -6   3   6   37.52    3.42
  -6   3   6   40.15    2.95
  -6   3   6   37.74    2.94
  -6   3   6   37.61    2.90
  -6   3   6   38.83    2.81
  -6   3   6   35.67    2.82
   6  -3  -6   39.08    2.94
   6  -3  -6   40.43    2.98
   7  -3   6   37.18    3.40
   7   3  -6   45.68    3.43
   7   3  -6   46.29    3.40
   7   3  -6   45.39    3.44
   7  -3   6   40.19    3.34
   7   3  -6   45.88    3.30
  -7  -3   6   43.51    3.56
  -7   3  -6   41.28    3.42
  -7   3  -6   37.69    4.06
  -7  -3   6   49.01    3.69
  -7   3  -6   40.66    3.18
  -7   3  -6   39.65    3.38
  -7   3  -6   45.02    3.49
   9   3  -6   28.54    2.58
   9   3  -6   27.86    2.50
  -1  -4  -6  118.34    7.96
  -1  -4  -6  123.94    7.89
   1   4  -6   98.92    8.05
   1   4  -6  102.00    8.02
   1   4  -6  108.87    7.94
   1   4  -6  100.54    9.03
  -1  -4  -6  131.24    7.70
   1   4  -6   97.31    7.99
  -1  -4  -6  130.53    8.12
  -1  -4  -6  135.03    8.14
  -1  -4  -6  133.57    8.23
   1   4  -6  105.05    7.92
  -1  -4  -6  130.27    8.19
   1   4  -6  109.26    8.03
   1   4  -6   97.06    7.62
   1   4  -6   99.82    7.91
   1   4   6  134.13    8.03
   1   4   6  127.94    7.86
  -1  -4   6   98.51    7.77
   1   4   6  125.39    8.13
  -1  -4   6  102.68    8.03
   1   4   6  123.28    7.86
   1   4   6  134.34    8.05
   1   4   6  125.47    8.33
  -1  -4   6  105.69    7.89
   1   4   6  130.08    8.03
  -1  -4   6  106.62    7.63
   1   4   6  126.58    9.31
  -1  -4   6  101.50    7.87
  -1  -4   6  103.69    7.98
   1   4   6  129.17    7.73
  -2   4   6   53.55    3.28
   2   4  -6   41.22    3.44
   2   4  -6   42.65    3.29
   2   4  -6   42.20    3.32
  -2   4   6   54.65    3.39
   2   4  -6   43.80    3.43
  -2   4   6   54.46    3.45
   2   4  -6   46.86    3.31
   2   4  -6   45.80    3.49
   2   4  -6   45.43    3.43
  -2   4   6   54.50    3.53
   2   4  -6   45.51    3.38
  -2   4   6   52.71    4.04
   2   4  -6   42.90    3.40
   2   4  -6   44.19    3.40
  -2   4   6   54.07    3.45
  -2   4   6   51.16    3.35
  -2  -4   6   44.91    3.47
   2  -4  -6   56.59    3.28
   2  -4  -6   53.23    3.29
  -2  -4   6   45.72    3.36
  -2  -4   6   41.18    3.45
  -2  -4   6   40.93    3.32
   2  -4  -6   53.43    3.41
  -2  -4   6   41.39    3.46
  -2  -4   6   44.05    3.53
  -2  -4   6   45.92    3.46
   2  -4  -6   55.93    3.41
  -2  -4   6   44.46    3.44
  -2  -4   6   48.01    3.32
   3  -4   6  171.29   11.46
   3  -4   6  160.57   11.59
   3  -4   6  173.78   11.98
   3  -4   6  176.38   11.49
   3  -4   6  165.52   11.32
   3  -4   6  159.72   12.86
  -3   4  -6  164.35   11.39
  -3   4  -6  161.77   11.97
  -3   4  -6  175.10   11.24
  -3   4  -6  159.17   11.25
  -3   4  -6  165.89   11.37
  -3   4  -6  155.76   13.15
  -3   4  -6  154.37   10.81
  -3   4  -6  167.01   11.62
   5   4  -6   44.75    3.77
   5   4  -6   45.60    3.66
  -5   4   6   61.19    3.75
   5   4  -6   42.96    3.72
  -5   4   6   61.36    3.70
   5   4  -6   44.05    3.78
  -5   4   6   61.07    3.58
  -5   4   6   60.89    4.40
   5  -4  -6   61.11    3.75
  -5  -4   6   47.33    3.81
  -5  -4   6   43.43    3.73
  -5  -4   6   46.64    3.92
  -5  -4   6   43.88    3.79
  -5  -4   6   46.39    3.69
  -6   4   6   26.13    1.87
  -6   4   6   26.08    1.97
  -6   4   6   25.41    1.93
  -6   4   6   27.71    2.03
  -6   4   6   25.75    1.96
  -6   4   6   25.79    1.89
   6   4  -6   22.52    2.05
  -6   4   6   26.74    2.38
  -6   4   6   25.30    1.95
   6   4  -6   22.62    2.06
   6   4  -6   21.69    2.01
   6   4  -6   23.52    1.97
   6  -4  -6   26.70    1.95
  -6  -4   6   20.47    2.12
  -6  -4   6   24.25    2.06
  -6  -4   6   23.14    2.01
  -6  -4   6   21.46    1.86
  -6  -4   6   21.49    1.97
  -6  -4   6   23.84    2.17
   6  -4  -6   25.73    1.97
  -6  -4   6   23.41    2.08
  -8   4   6   17.59    2.02
  -8   4   6   18.83    1.64
  -8   4   6   19.22    1.63
  -8   4   6   18.15    1.67
  -8   4   6   18.58    1.67
   8  -4  -6   17.86    1.65
   8  -4  -6   18.01    1.69
   0  -5   6   44.34    2.89
   0   5  -6   41.89    2.84
   0  -5   6   44.36    2.77
   0  -5   6   43.00    2.89
   0   5   6   31.62    2.85
   0   5  -6   42.37    2.75
   0   5  -6   41.94    2.87
   0   5   6   31.70    2.76
   0   5   6   31.29    3.39
   0  -5  -6   31.50    2.82
   0  -5   6   43.57    2.91
   0   5   6   32.58    2.92
   0   5  -6   44.04    3.28
   0  -5   6   41.53    2.78
   0   5  -6   40.66    2.89
   0   5  -6   44.02    2.85
   0  -5   6   41.60    2.93
  -3   5   6   51.12    4.00
   3   5  -6   61.55    4.10
  -3  -5  -6   50.23    4.18
   3   5  -6   64.95    4.13
  -3  -5  -6   50.80    4.06
  -3   5   6   54.44    4.01
   3   5  -6   60.54    3.95
  -3   5   6   48.51    3.90
  -3  -5  -6   49.98    4.06
  -3  -5  -6   54.77    4.25
  -3  -5  -6   54.47    4.20
   3   5  -6   60.58    4.16
   3   5  -6   61.40    4.04
  -3   5   6   54.00    4.09
   3   5  -6   62.97    4.11
  -3   5   6   53.23    3.95
  -3   5   6   51.66    3.81
  -3   5   6   50.00    4.67
  -3  -5   6   66.03    4.21
   3   5   6   54.40    4.17
  -3  -5   6   63.18    4.15
   3   5   6   52.53    4.11
   3  -5  -6   58.65    4.03
  -3  -5   6   65.63    4.17
  -3  -5   6   62.37    4.04
  -3  -5   6   62.29    4.27
   3  -5  -6   55.37    4.02
   3   5   6   52.76    4.18
   3  -5  -6   57.69    3.99
   3  -5  -6   52.06    3.98
  -3  -5   6   61.94    4.03
  -3  -5   6   59.26    4.16
   3   5   6   49.29    4.75
   3  -5  -6   53.71    3.84
   3   5   6   49.62    3.97
   3   5   6   55.52    4.27
  -3  -5   6   61.37    4.16
   4   5  -6   40.20    2.83
   4   5  -6   39.58    2.70
   4  -5   6   30.47    2.72
   4   5  -6   42.03    2.92
   4   5  -6   40.14    2.78
   4  -5   6   30.78    2.67
   4   5  -6   42.19    2.86
  -4  -5   6   41.09    2.99
  -4  -5   6   41.70    2.87
  -4  -5   6   39.85    2.89
  -4   5  -6   30.77    2.69
  -4   5  -6   33.09    2.66
  -4  -5   6   41.46    2.77
  -4  -5   6   39.58    2.89
  -4   5  -6   30.41    2.70
  -4   5  -6   30.35    2.94
  -4  -5   6   39.31    2.80
   5   5  -6   40.26    3.13
   5   5  -6   40.38    3.01
   5   5  -6   40.43    3.15
   5   5  -6   39.41    3.08
  -5  -5   6   39.49    3.28
  -5  -5   6   41.18    3.11
  -5  -5   6   41.42    3.20
  -5  -5   6   45.39    3.29
  -5  -5   6   39.57    3.13
  -5  -5   6   40.63    3.19
  -5  -5   6   39.93    3.02
   6  -5   6   34.43    2.88
  -6  -5  -6   38.23    2.93
   6  -5   6   35.25    2.77
  -6  -5  -6   37.56    3.02
  -6  -5  -6   36.85    3.26
   6   5   6   36.05    3.04
   6   5   6   35.85    2.92
  -6   5  -6   33.14    3.50
  -6   5  -6   38.56    2.77
  -6   5  -6   39.90    2.85
  -6   5  -6   35.68    2.84
   6   5   6   34.23    3.42
   6   5   6   39.32    3.03
  -6   5  -6   35.00    2.83
  -6   5  -6   37.90    2.79
  -6   5  -6   32.05    2.61
  -6   5  -6   35.73    3.17
   7  -5   6   16.91    1.49
   7  -5   6   17.06    1.62
  -7   5  -6   16.46    1.55
  -7   5  -6   15.32    1.52
  -7   5  -6   14.33    1.99
  -7   5  -6   15.90    1.39
  -8   5   6   14.24    1.39
  -8   5   6   14.79    1.35
  -8   5   6   15.72    1.85
  -8   5   6   14.94    1.42
   8  -5  -6   14.84    1.41
   8  -5  -6   15.25    1.45
   2   6  -6   17.41    1.50
   2   6  -6   17.02    1.43
   2   6  -6   17.15    1.43
   2   6  -6   17.47    1.47
   2   6  -6   17.57    1.36
   2   6  -6   18.78    1.33
  -2  -6   6   18.10    1.35
  -2  -6   6   16.32    1.38
  -2  -6   6   17.25    1.45
  -2  -6   6   16.05    1.46
  -2  -6   6   16.08    1.42
  -2  -6   6   17.58    1.43
  -2  -6   6   17.96    1.38
  -2  -6   6   16.29    1.43
   3   6  -6   46.77    3.25
  -3   6   6   54.03    3.29
   3   6  -6   48.16    3.34
   3   6  -6   47.48    3.29
   3   6  -6   47.43    3.34
   3   6  -6   44.90    3.16
   3   6  -6   49.78    3.15
   3  -6   6   45.14    3.23
   3   6  -6   50.05    3.52
   3  -6   6   47.07    3.54
   3   6  -6   43.99    3.41
   3  -6   6   43.83    3.24
  -3   6  -6   42.79    3.27
  -3   6  -6   41.01    3.23
  -3  -6   6   41.68    3.39
  -3   6  -6   41.20    3.94
  -3   6  -6   44.27    3.52
  -3  -6   6   43.79    3.43
  -3  -6   6   49.00    3.43
  -3   6  -6   40.70    3.08
  -3  -6   6   44.56    3.31
  -3  -6   6   43.52    3.49
  -3   6  -6   42.74    3.21
  -3  -6   6   46.03    3.30
  -3   6  -6   45.19    3.20
  -3   6  -6   45.01    3.27
  -3  -6   6   44.28    3.39
   4   6  -6   33.87    2.53
   4   6  -6   32.81    2.39
   4   6  -6   30.24    2.25
   4   6  -6   33.26    2.41
   4   6  -6   32.72    2.35
  -4   6  -6   23.76    2.21
  -4  -6   6   31.15    2.47
  -4  -6   6   30.41    2.39
  -4  -6   6   29.11    2.53
  -4  -6   6   32.01    2.46
  -4  -6   6   30.21    2.46
  -4  -6   6   30.62    2.33
   5   6  -6   40.21    3.11
   5   6  -6   44.22    3.31
   5   6  -6   43.17    3.23
   5   6  -6   42.91    3.28
  -5  -6   6   43.10    3.38
  -5  -6   6   44.20    3.30
  -5  -6   6   45.42    3.43
  -5  -6   6   45.25    3.22
  -5  -6   6   41.22    3.45
  -5  -6   6   41.06    3.34
  -5  -6   6   39.84    3.30
  -6  -6  -6    7.08    0.97
   6  -6   6    6.37    0.74
  -6  -6  -6    7.46    1.14
  -6  -6  -6    8.40    0.96
   6  -6   6    5.99    0.84
   6   6   6    8.13    1.22
  -6   6  -6    6.40    0.78
  -6   6  -6    6.37    1.12
  -6   6  -6    7.20    0.78
   6   6   6    7.83    1.01
  -6   6  -6    5.78    0.70
   6   6   6    7.96    0.94
  -6   6  -6    6.99    0.79
   7   6  -6   10.39    1.22
   7  -6   6    8.14    1.01
  -7   6   6   12.07    0.98
   7   6  -6    9.98    1.13
   7  -6   6    7.97    1.12
  -7   6   6   12.12    1.01
  -7   6   6   10.85    1.39
  -7   6   6   11.49    1.06
  -7   6   6   11.80    0.96
   7   6  -6   10.29    1.20
  -7   6   6   11.28    1.01
  -7  -6   6    8.70    1.10
  -7  -6   6   10.22    1.33
   7  -6  -6   12.36    1.03
  -7   6  -6    7.90    0.92
   7  -6  -6   12.58    1.08
  -7   6  -6    8.85    1.01
  -7   6  -6    7.51    1.01
  -7  -6   6   10.07    1.22
  -7   6  -6    6.91    1.40
  -7   6  -6    8.12    1.03
  -8   6   6    0.66    0.55
   8   6  -6   -0.22    0.34
  -8   6   6    0.62    0.33
  -8   6   6    0.74    0.36
  -8   6   6    1.09    0.39
  -8   6   6    0.97    0.33
   8   6  -6   -0.32    0.44
   8  -6  -6    0.81    0.39
   8  -6  -6    0.85    0.41
   0   7  -6  105.07    7.64
   0  -7   6  112.18    8.18
   0  -7   6  108.88    8.08
   0   7  -6  109.40    8.02
   0  -7   6  112.76    7.79
   0   7  -6  131.25    8.27
   0  -7   6  113.60    8.09
   0   7  -6  112.92    7.95
   0   7  -6  115.93    8.06
   0   7  -6  115.34    7.94
   0   7  -6  115.76    9.19
   0  -7   6  124.67    7.86
   0  -7   6  114.04    8.02
   0  -7   6  123.24    8.30
   1   7  -6   51.64    3.52
   1   7  -6   55.44    3.64
  -1  -7  -6   41.42    3.50
   1   7  -6   52.76    3.58
  -1  -7  -6   40.27    3.58
  -1  -7  -6   44.61    3.52
   1   7  -6   54.17    3.54
  -1  -7  -6   44.76    3.59
  -1  -7  -6   40.96    3.62
   1   7   6   43.83    3.46
  -1  -7   6   53.13    3.58
   1   7   6   43.92    4.21
   1   7   6   41.19    3.55
  -1  -7   6   54.05    3.59
  -1  -7   6   56.46    3.57
  -1  -7   6   57.55    3.46
   1   7   6   44.15    3.62
   1   7   6   40.03    3.61
  -1  -7   6   52.04    3.45
  -1  -7   6   54.04    3.54
  -1  -7   6   51.99    3.62
   1   7   6   43.64    3.57
   3  -7   6   59.24    3.92
   3  -7   6   57.49    3.93
  -3   7  -6   59.60    3.91
  -3   7  -6   52.77    4.76
  -3   7  -6   54.01    3.74
  -3   7  -6   53.24    3.91
  -3   7  -6   53.19    3.88
  -3   7  -6   53.78    3.94
  -4   7   6   54.07    3.82
  -4   7   6   53.56    3.86
  -4   7   6   48.54    3.84
  -4   7   6   51.71    3.68
  -4   7   6   58.65    4.71
  -4   7   6   56.87    3.88
   4  -7  -6   56.32    3.91
   4  -7  -6   56.24    3.87
   5   7  -6   44.36    3.31
   5   7  -6   44.04    3.21
   5   7  -6   42.88    3.11
  -5  -7   6   41.04    3.37
  -5  -7   6   42.41    3.44
  -5  -7   6   46.60    3.39
  -5  -7   6   42.50    3.52
  -5  -7   6   42.68    3.42
  -5  -7   6   41.40    3.24
   6   7  -6   13.71    1.25
   6   7  -6   13.69    1.18
   6  -7   6   11.55    1.13
  -6   7  -6   11.79    1.13
  -6  -7   6   15.19    1.45
  -6   7  -6   11.77    1.12
  -6  -7   6   13.12    1.37
  -6  -7   6   13.37    1.37
  -6   7  -6   11.65    1.06
  -6  -7   6   13.89    1.47
  -6  -7   6   14.18    1.27
  -6  -7   6   13.81    1.52
  -6   7  -6   12.87    1.16
  -6   7  -6   10.83    1.60
   7  -7   6    2.84    0.54
  -7   7  -6    3.29    0.50
  -7   7  -6    3.01    0.89
  -7   7  -6    2.99    0.56
  -7   7  -6    3.18    0.55
  -1  -8  -6   26.43    2.46
  -1  -8  -6   25.85    2.41
   1   8  -6   36.37    2.45
   1   8  -6   36.52    2.46
   1   8  -6   37.57    2.51
  -1  -8  -6   27.83    2.48
   1   8   6   27.57    2.48
   1   8   6   29.83    3.00
   1   8   6   27.70    2.51
  -1  -8   6   35.93    2.46
  -1  -8   6   34.92    2.38
  -1  -8   6   35.93    2.51
  -1  -8   6   37.62    2.49
   1   8   6   26.64    2.40
   1   8   6   26.15    2.51
  -2  -8  -6   18.46    1.80
  -2  -8  -6   21.90    1.82
  -2  -8  -6   20.01    1.79
  -2  -8  -6   20.48    1.77
  -2  -8  -6   19.72    1.89
   2   8   6   21.63    1.93
   2   8   6   20.68    2.16
   2   8   6   20.11    1.82
  -3  -8  -6   14.42    1.38
  -3  -8  -6   12.26    1.32
  -3  -8  -6   13.04    1.38
  -3  -8  -6   12.42    1.44
  -3  -8  -6   14.35    1.33
  -3  -8  -6   13.48    1.37
   3   8   6   13.77    1.66
  -4   8   6   29.71    2.07
  -4   8   6   29.74    2.65
  -4   8   6   27.43    1.96
  -4   8   6   26.22    2.06
  -4   8   6   26.08    2.03
  -4   8   6   25.53    2.02
   4  -8  -6   26.35    2.03
   4  -8  -6   28.73    2.08
  -5   8   6   40.43    2.85
  -5   8   6   40.71    2.98
  -5   8   6   42.39    3.00
  -5   8   6   43.93    2.99
  -5   8   6   43.89    3.06
  -5   8   6   44.49    2.86
  -5   8  -6   41.11    3.09
  -5   8  -6   38.69    2.83
  -5   8  -6   43.25    3.03
  -5   8  -6   39.54    2.96
  -5   8  -6   41.80    3.00
  -5   8  -6   38.46    3.87
   7   8  -6    3.30    0.60
  -7  -8   6    3.93    0.82
  -7  -8   6    4.02    0.78
  -1   9   6    8.43    0.87
  -1   9   6    9.47    0.92
  -1   9   6    9.01    0.93
  -1   9   6    8.93    0.91
  -1   9   6    9.17    0.93
  -1   9   6    8.73    1.17
   1  -9  -6    8.74    0.89
   1  -9  -6    8.54    0.88
   1  -9  -6    8.04    0.88
  -3  -9  -6   42.13    3.88
   3   9  -6   56.53    3.90
  -3  -9  -6   41.67    3.82
  -3  -9  -6   41.30    3.84
  -3   9  -6   47.48    4.37
   3   9   6   44.07    4.48
  -3   9  -6   51.59    3.51
  -3  -9   6   55.98    3.77
  -3   9  -6   53.11    3.53
  -3  -9   6   50.61    3.83
  -3   9  -6   52.63    3.52
  -3  -9   6   51.15    3.84
  -3  -9   6   53.43    3.81
  -3   9  -6   48.63    3.50
  -4   9   6   31.44    2.49
  -4   9   6   31.15    2.43
  -4   9   6   30.68    2.46
  -4   9   6   31.19    2.32
  -4   9   6   31.11    2.42
  -4  -9   6   37.90    2.86
  -4  -9   6   41.05    2.92
  -4  -9   6   40.77    2.85
  -5   9   6   13.12    1.18
  -5   9   6   12.34    0.97
  -5   9   6   11.91    0.98
  -5   9   6   12.30    1.13
  -5  -9   6   15.62    1.51
  -5  -9   6   17.20    1.57
  -5  -9   6   15.97    1.52
  -5  -9   6   16.51    1.40
  -6  -9   6    4.95    0.91
  -6  -9   6    4.81    0.84
  -6  -9   6    4.73    0.84
   1 -10   6    7.44    0.75
   1 -10   6    7.41    0.72
   1 -10   6    7.57    0.75
  -1  10  -6    8.09    0.79
  -1  10  -6    6.56    0.72
  -1  10  -6    7.08    0.77
  -1  10  -6    6.84    0.74
  -2 -10  -6   33.37    2.73
  -2 -10  -6   31.48    2.70
  -2 -10  -6   29.61    2.71
   2  10   6   32.73    3.29
   2  10   6   35.32    2.89
  -3  10   6   23.08    1.79
  -3  10   6   21.75    1.88
  -3  10   6   22.94    1.88
   3  10  -6   29.04    2.26
  -3  10   6   23.81    1.93
  -3  10   6   22.63    1.87
  -3  10  -6   26.89    1.78
  -3 -10   6   26.95    2.19
  -3  10  -6   26.19    2.52
  -3  10  -6   23.07    1.82
   3 -10  -6   22.92    1.92
  -3 -10   6   24.22    2.12
  -3  10  -6   23.89    1.84
  -3 -10   6   26.63    2.15
  -4 -10   6   30.69    2.59
  -4 -10   6   28.32    2.50
  -4 -10   6   28.56    2.54
  -5 -10   6   12.29    1.38
  -5 -10   6   11.54    1.38
  -5 -10   6   11.85    1.38
  -6 -10   6   -0.03    0.48
  -6 -10   6   -0.02    0.38
   0 -11   6   16.70    1.51
   0 -11   6   16.81    1.53
   0  11  -6   18.84    1.60
   0  11  -6   17.65    1.56
   0  11  -6   17.58    1.56
   0  11  -6   17.35    1.52
   1  11  -6    4.76    0.73
   1  11  -6    3.91    0.69
   1 -11   6    5.94    0.68
   1 -11   6    6.43    0.69
  -1  11  -6    6.46    0.71
  -1  11  -6    5.56    0.67
  -1  11  -6    6.21    0.68
  -1 -11   6    4.45    0.72
  -1 -11   6    4.65    0.73
  -1  11  -6    6.30    0.66
  -3  11   6    2.62    0.46
  -3  11   6    2.45    0.39
  -3  11   6    2.54    0.39
  -3  11   6    2.36    0.41
  -3  11   6    2.33    0.43
   3  11   6    0.73    0.78
  -5 -11   6   16.72    1.77
  -5 -11   6   17.04    1.82
   0 -12  -6    4.28    0.71
   0  12   6    3.41    0.67
   0  12   6    3.31    0.70
   0 -12  -6    3.32    0.67
   1  12  -6    6.71    0.88
   1  12  -6    7.26    0.94
  -1 -12   6    7.23    0.91
  -1 -12   6    6.53    0.87
  -3  12   6    5.58    0.69
  -3  12   6    5.20    0.63
  -3  12   6    4.79    0.52
  -3  12  -6    4.07    0.55
  -3 -12   6    2.61    0.70
  -3  12  -6    3.83    0.53
  -4 -12   6   18.71    1.93
   0 -13   6   17.35    1.67
   0 -13   6   18.66    1.69
   0  13  -6   18.19    1.70
   0   0   7    3.65    0.40
   0   0  -7    3.48    0.39
   0   0   7    3.29    0.42
   0   0  -7    3.05    0.40
   0   0  -7    3.59    0.39
   0   0  -7    3.13    0.41
   0   0   7    3.50    0.41
   0   0  -7    3.61    0.46
   0   0   7    3.39    0.36
   0   0  -7    3.25    0.37
   0   0   7    3.24    0.40
   0   0   7    3.59    0.45
   0   0  -7    3.20    0.39
   0   0  -7    3.75    0.43
   0   0   7    3.07    0.41
   0   0   7    2.77    0.48
   0   0  -7    3.40    0.39
   0   0   7    3.58    0.41
   0   0   7    3.63    0.43
   1   0  -7  112.36    7.44
   1   0  -7  109.13    7.57
  -1   0   7  114.66    7.57
  -1   0   7  104.01    7.43
  -1   0   7  110.74    7.46
  -1   0   7  108.78    8.62
   1   0  -7  121.36    7.78
   1   0  -7  112.87    7.58
  -1   0   7  115.43    7.44
  -1   0   7  115.05    7.20
  -1   0   7  104.21    7.61
   1   0  -7  106.97    7.64
  -1   0   7  109.16    7.55
  -1   0   7  105.14    7.64
   1   0  -7  117.67    7.48
   1   0  -7  106.05    7.44
   1   0  -7  104.96    7.54
  -1   0   7  100.83    7.54
  -1   0   7  101.97    7.32
  -1   0   7  104.27    7.73
   1   0  -7  102.12    7.62
  -2   0   7  356.46   25.22
  -2   0   7  379.55   25.59
  -2   0   7  363.13   29.09
   2   0  -7  375.10   25.84
   2   0  -7  383.34   26.67
  -2   0   7  376.76   25.81
  -2   0   7  384.65   25.85
   2   0  -7  381.67   25.51
  -2   0   7  368.45   25.24
   2   0  -7  369.03   24.28
  -2   0   7  371.27   25.49
   2   0  -7  373.36   25.50
   2   0  -7  363.12   25.81
  -2   0   7  368.55   26.09
   2   0  -7  381.65   25.63
  -2   0   7  375.36   25.21
   2   0  -7  401.29   25.27
   2   0  -7  392.69   25.24
  -2   0   7  363.85   24.27
  -2   0   7  360.20   24.81
   2   0  -7  386.10   24.82
   2   0  -7  368.04   25.22
  -3   0   7  388.03   25.99
   3   0  -7  415.59   26.03
  -3   0  -7  336.83   25.93
  -3   0   7  407.59   26.05
   3   0  -7  401.35   25.06
   3   0  -7  397.39   26.62
   3   0  -7  409.05   26.02
  -3   0   7  421.50   26.65
   3   0  -7  424.98   27.57
  -3   0   7  390.94   30.05
  -3   0   7  421.49   25.06
   3   0   7  354.05   26.33
  -3   0  -7  359.03   26.12
  -3   0   7  434.66   26.35
   3   0   7  335.01   26.69
   3   0  -7  381.18   26.64
   3   0   7  354.64   26.09
  -3   0   7  410.77   27.54
  -3   0  -7  376.62   26.61
   3   0   7  343.36   26.39
  -3   0   7  402.48   26.60
  -3   0   7  400.24   26.36
  -3   0   7  394.26   25.97
  -3   0  -7  363.80   25.07
  -3   0   7  402.59   26.08
  -3   0  -7  364.20   26.35
  -3   0  -7  373.46   26.63
  -3   0  -7  336.72   27.58
   3   0  -7  425.70   26.31
   3   0  -7  423.11   25.61
  -3   0  -7  348.68   25.95
  -3   0   7  404.24   26.31
   3   0  -7  426.86   26.45
  -3   0   7  404.12   26.33
  -3   0  -7  374.04   26.06
   3   0   7  345.92   29.97
   3   0   7  345.66   26.63
   3   0   7  354.78   26.97
   3   0   7  378.55   25.71
  -3   0   7  395.60   26.92
  -3   0   7  402.91   25.59
  -3   0  -7  381.14   26.34
  -4   0   7  190.84   15.56
  -4   0   7  209.00   13.87
  -4   0   7  205.88   13.84
   4   0  -7  217.24   14.46
   4   0  -7  200.42   13.92
   4   0  -7  207.82   13.73
   4   0   7  185.05   14.01
   4   0   7  184.82   13.66
   4   0  -7  203.96   13.56
  -4   0  -7  214.24   13.68
   4   0   7  185.79   13.79
  -4   0  -7  189.07   13.72
  -4   0  -7  206.94   13.83
  -4   0   7  201.72   13.33
   4   0   7  188.15   13.93
  -4   0  -7  204.21   13.86
  -4   0   7  200.38   13.79
  -4   0   7  201.42   13.60
  -4   0   7  196.82   14.07
  -4   0   7  193.52   13.12
   4   0  -7  195.69   13.89
   4   0  -7  206.55   13.81
  -4   0  -7  193.04   13.84
  -4   0   7  189.91   13.74
  -4   0   7  213.10   13.66
  -4   0  -7  201.16   13.16
  -4   0  -7  181.61   14.52
   4   0   7  211.87   13.55
  -4   0   7  202.31   13.10
  -4   0   7  197.68   14.40
  -4   0  -7  186.31   13.85
   4   0  -7  206.96   13.37
  -4   0   7  210.82   13.67
   5   0  -7   19.09    1.47
  -5   0   7   19.12    1.42
  -5   0   7   17.60    1.46
  -5   0   7   16.74    1.61
   5   0  -7   17.87    1.52
   5   0  -7   18.90    1.52
  -5   0   7   17.22    1.49
  -5   0   7   18.61    1.63
   5   0  -7   20.79    1.52
  -5   0   7   17.65    1.54
  -5   0   7   18.52    1.59
   5   0  -7   16.58    1.51
  -5   0   7   17.75    1.49
  -5   0   7   16.96    1.56
  -5   0   7   18.71    1.55
   6   0  -7    9.27    0.99
   6   0  -7    9.78    1.01
   6   0  -7    9.58    1.01
  -6   0   7   10.37    1.07
  -6   0   7    9.35    1.04
  -6   0   7    9.64    1.04
  -6   0   7   11.28    1.05
   6   0  -7   10.65    0.97
  -6   0   7   10.13    1.04
  -6   0   7    9.60    1.11
   8   0  -7   23.75    2.19
   8   0   7   28.49    2.34
   8   0   7   28.25    2.28
   8   0  -7   23.59    2.20
  -8   0   7   23.61    2.27
   8   0  -7   22.18    2.17
  -8   0  -7   28.58    3.00
   9   0  -7   38.52    3.30
   9   0  -7   40.80    3.30
   0  -1   7   30.24    2.19
   0   1  -7   27.54    2.09
   0  -1   7   32.33    2.16
   0   1  -7   29.51    2.18
   0  -1   7   28.75    2.21
   0  -1   7   28.87    2.21
   0   1  -7   28.92    2.09
   0   1  -7   28.11    2.10
   0  -1   7   29.70    2.16
   0  -1   7   29.22    2.20
   0  -1   7   29.50    2.49
   0  -1   7   30.00    2.21
   0   1  -7   29.81    2.20
   0  -1   7   28.59    2.26
   0   1  -7   30.03    2.50
   0  -1   7   30.86    2.10
   0   1  -7   30.53    2.16
   0   1  -7   29.35    2.20
   0   1  -7   30.53    2.28
   0  -1   7   28.16    2.11
  -2  -1  -7  178.69   12.97
  -2  -1  -7  184.66   12.80
  -2  -1  -7  189.88   13.03
  -2  -1  -7  188.07   12.37
   2   1   7  194.29   13.16
   2   1   7  193.03   13.21
   2   1   7  183.93   14.82
   2   1   7  193.20   13.05
   2   1   7  194.36   13.05
   2   1   7  187.68   12.87
  -3  -1  -7  223.52   15.62
  -3  -1  -7  228.05   16.08
   3  -1   7  239.70   16.11
  -3  -1  -7  227.69   16.04
  -3  -1  -7  224.22   15.12
   3  -1   7  246.92   16.27
   3  -1   7  239.39   15.88
   3  -1   7  238.27   16.03
  -3  -1  -7  214.04   15.88
   3  -1   7  251.53   15.88
   3  -1   7  242.79   18.06
  -3  -1  -7  215.19   15.91
  -3  -1  -7  210.83   15.61
  -3  -1  -7  222.62   15.78
  -3  -1  -7  205.29   16.66
   3  -1   7  245.88   15.71
  -3   1  -7  251.93   15.70
   3   1   7  209.80   15.71
  -3   1  -7  236.35   15.74
  -3   1  -7  254.84   15.96
   3   1   7  214.55   16.11
   3   1   7  206.90   16.03
  -3   1  -7  250.36   15.95
  -3   1  -7  239.63   16.67
   3   1   7  203.88   15.88
   3   1   7  214.27   15.89
  -3   1  -7  229.50   15.09
  -3   1  -7  251.87   15.87
   3   1   7  232.33   15.53
  -3   1  -7  275.06   16.33
   3   1   7  210.14   18.07
   4   1  -7   45.89    3.35
   4   1  -7   46.68    3.34
   4   1  -7   49.86    3.34
  -4  -1  -7   37.28    3.32
  -4  -1  -7   37.47    3.30
  -4  -1  -7   37.73    3.19
  -4  -1  -7   35.77    3.38
  -4  -1  -7   36.85    3.33
  -4  -1  -7   37.12    3.13
   4   1  -7   52.19    3.24
   4   1  -7   51.66    3.25
   4   1  -7   52.05    3.53
   4   1  -7   47.10    3.32
   4   1   7   36.73    3.40
   4   1   7   37.39    3.32
  -4  -1   7   47.73    3.17
  -4  -1   7   48.29    3.28
  -4  -1   7   45.32    3.15
  -4  -1   7   49.59    3.33
  -4  -1   7   49.33    3.26
  -4  -1   7   49.26    3.40
  -4  -1   7   48.90    3.18
  -4  -1   7   45.87    3.45
  -4  -1   7   48.63    3.23
  -4  -1   7   45.88    3.34
  -4  -1   7   46.53    3.43
  -4  -1   7   48.79    3.32
   5  -1   7   20.02    1.63
   5  -1   7   17.54    1.60
   5  -1   7   19.29    1.66
   5  -1   7   18.45    1.72
  -5   1  -7   18.26    1.83
  -5   1  -7   19.47    1.73
  -5   1  -7   19.69    1.70
  -5   1  -7   18.63    2.06
  -5   1  -7   19.82    1.60
  -5   1  -7   20.27    1.68
   6   1  -7    2.11    0.42
   6   1  -7    2.34    0.45
   6   1  -7    2.34    0.42
   6   1  -7    1.91    0.41
  -6  -1   7    2.31    0.45
  -6  -1   7    2.39    0.49
  -6  -1   7    1.83    0.46
  -6  -1   7    1.98    0.47
  -6  -1   7    2.00    0.47
  -6  -1   7    2.19    0.42
   7   1  -7    8.53    0.99
   7   1  -7    8.29    0.98
   7   1  -7    8.69    0.98
   7   1  -7    8.46    0.94
  -7  -1   7    7.55    1.00
  -7  -1   7    8.81    1.11
  -7  -1   7    8.25    1.03
   8   1  -7   13.91    1.50
   8   1  -7   14.38    1.51
   8  -1   7   19.36    1.66
   8   1  -7   14.20    1.50
  -8  -1   7   14.83    1.61
   9   1  -7   31.97    2.85
   9   1  -7   33.89    2.86
   1   2  -7   43.90    2.86
  -1   2   7   37.61    2.82
   1   2  -7   42.87    2.84
  -1   2   7   33.54    2.69
  -1   2   7   33.92    2.82
  -1   2   7   34.80    2.91
  -1   2   7   34.72    2.68
  -1   2   7   36.54    2.79
  -1   2   7   34.54    2.83
  -1   2   7   35.59    2.79
  -1   2   7   36.59    2.72
  -1   2   7   37.44    2.75
  -1   2   7   33.62    2.67
  -1   2   7   35.42    2.77
   1   2  -7   44.44    2.74
   1   2  -7   40.69    2.76
  -1   2   7   33.35    3.27
   1   2  -7   44.01    2.86
  -1   2   7   36.22    2.74
   1   2  -7   42.75    2.81
   1   2  -7   42.18    2.80
  -1   2   7   36.24    2.70
   1   2  -7   42.67    2.74
   1   2  -7   42.58    2.87
   1  -2  -7   35.22    2.74
  -1  -2   7   41.66    2.76
  -1  -2   7   42.46    2.76
   1  -2  -7   35.34    2.86
   1  -2  -7   33.51    2.83
  -1  -2   7   42.38    2.87
   1  -2  -7   36.25    2.83
  -1  -2   7   40.76    2.85
   1  -2  -7   36.71    2.87
   1  -2  -7   38.40    2.84
   1  -2  -7   37.28    2.77
  -1  -2   7   41.46    3.21
  -1  -2   7   45.62    2.80
  -1  -2   7   44.24    2.86
  -1  -2   7   41.28    2.86
  -1  -2   7   44.74    2.79
  -1  -2   7   43.65    2.92
  -1  -2   7   43.79    2.85
   2  -2   7  100.70    7.20
   2  -2   7   97.97    7.09
   2  -2   7  101.40    6.87
   2  -2   7   97.40    7.04
   2  -2   7  100.68    6.96
   2  -2   7   98.29    7.92
   2  -2   7  104.16    7.00
  -2   2  -7  106.86    6.91
  -2   2  -7   98.94    6.92
  -2   2  -7  105.75    7.20
  -2   2  -7   96.28    6.99
  -2   2  -7   98.92    6.66
  -2   2  -7  101.60    6.94
  -2   2  -7   98.70    7.02
  -2   2  -7   95.59    7.31
   3  -2   7  132.45    9.45
   3  -2   7  134.49    8.21
   3   2  -7  118.64    8.05
   3   2  -7  109.98    8.38
   3  -2   7  127.86    8.53
   3   2  -7  104.03    8.34
   3   2  -7  115.23    8.33
   3  -2   7  126.08    8.38
   3  -2   7  133.87    8.31
   3  -2   7  127.18    8.46
   3   2  -7  110.59    8.29
   3   2  -7  109.85    8.29
   3   2  -7  115.55    8.16
   3   2  -7  118.27    8.62
  -3  -2   7  110.97    8.14
  -3   2  -7  125.72    8.31
  -3  -2   7  110.46    8.37
  -3  -2   7  105.02    8.28
  -3  -2   7  113.91    7.89
  -3  -2   7  117.02    8.23
  -3   2  -7  138.75    8.57
  -3  -2   7  113.93    8.30
  -3  -2   7  113.52    8.39
  -3  -2   7  110.07    8.49
  -3  -2   7  104.24    8.58
  -3  -2   7  116.70    8.16
  -3  -2   7  116.37    7.94
  -3   2  -7  135.10    8.22
  -3   2  -7  127.74    8.78
  -3   2  -7  134.38    8.29
  -3  -2   7  113.20    8.07
  -3   2  -7  129.63    8.38
  -3  -2   7  117.45    8.34
  -3   2  -7  126.34    7.92
  -3  -2   7  110.95    8.18
  -4  -2  -7   63.08    3.97
   4  -2   7   51.14    3.85
  -4   2   7   51.90    3.83
  -4   2   7   54.77    3.70
  -4  -2  -7   63.32    4.16
  -4   2   7   53.56    3.88
   4  -2   7   53.28    3.90
  -4   2   7   50.43    3.69
  -4  -2  -7   59.26    3.81
   4  -2   7   46.86    3.98
  -4  -2  -7   62.10    4.37
  -4   2   7   51.42    3.80
  -4   2   7   53.27    3.96
   4  -2   7   52.72    3.89
   4  -2   7   46.31    3.89
  -4   2   7   50.58    3.88
  -4   2  -7   44.28    4.59
  -4   2  -7   47.70    3.93
   4   2   7   60.46    4.03
  -4   2  -7   48.67    3.90
   4   2   7   60.78    4.12
   4   2   7   61.72    4.00
   4   2   7   59.64    3.97
   4  -2  -7   51.58    3.90
  -4   2  -7   49.62    3.91
   4  -2  -7   55.33    3.88
   4  -2  -7   55.09    3.76
   4  -2  -7   56.30    3.75
  -4   2  -7   54.12    3.87
  -4   2  -7   47.16    3.70
   4   2   7   60.71    4.60
  -4   2  -7   45.64    4.15
   4  -2  -7   52.69    3.87
   5   2  -7   30.10    2.56
  -5   2   7   40.69    2.86
   5   2  -7   30.07    2.53
  -5   2   7   40.00    2.53
   5   2  -7   29.63    2.46
  -5   2   7   40.11    2.94
  -5   2   7   39.66    2.65
  -5   2   7   40.00    2.60
  -5   2   7   40.59    2.64
  -5   2   7   39.16    2.50
  -5  -2   7   29.93    2.47
  -5  -2   7   30.81    2.41
  -5  -2   7   28.95    2.53
  -5  -2   7   29.12    2.38
  -5  -2   7   31.06    2.52
  -5  -2   7   29.70    2.66
  -5  -2   7   30.62    2.48
  -5  -2   7   29.58    2.50
  -5  -2   7   29.98    2.69
  -5  -2   7   30.70    2.55
  -6   2   7    6.46    0.76
  -6  -2  -7    7.08    1.01
  -6   2   7    6.31    0.86
  -6   2   7    6.05    0.89
  -6   2   7    5.91    0.75
  -6   2   7    5.90    0.76
  -6   2   7    6.28    0.73
   6   2  -7    6.66    0.81
   6   2  -7    7.48    0.83
  -6   2   7    5.93    0.72
   6   2  -7    6.54    0.74
  -6   2   7    6.41    0.81
  -6   2   7    5.98    0.73
   6   2  -7    6.79    0.80
   6   2   7    5.93    0.89
   6  -2  -7    5.47    0.70
  -6  -2   7    7.16    0.54
  -6  -2   7    7.71    0.78
   6   2   7    5.35    0.79
  -6  -2   7    7.84    0.91
  -6  -2   7    7.83    0.69
  -6  -2   7    7.26    0.88
  -6  -2   7    6.03    0.83
  -6  -2   7    7.30    0.88
   6  -2  -7    5.90    0.74
   6  -2  -7    6.29    0.76
   6   2   7    5.62    0.79
   7  -2   7    0.18    0.29
   7   2  -7    0.60    0.35
   7  -2   7    0.14    0.33
  -7  -2  -7    1.27    0.55
   7  -2   7    0.20    0.34
   7   2  -7    0.97    0.37
   7   2  -7    0.48    0.35
   7   2  -7    0.69    0.37
  -7  -2   7    0.44    0.37
  -7  -2   7    1.13    0.50
  -7   2  -7    0.49    0.37
  -7   2  -7    0.32    0.37
   7   2   7    0.68    0.47
   7   2   7    1.09    0.55
   7   2   7    0.69    0.39
  -7   2  -7    0.38    0.32
   7   2   7    0.90    0.42
  -7   2  -7   -0.05    0.41
  -8  -2  -7    1.32    0.78
   8  -2   7    3.07    0.63
  -8   2  -7    2.97    0.89
   1   3  -7    8.58    0.80
  -1  -3  -7   12.06    0.88
  -1  -3  -7   12.55    0.97
   1   3  -7    8.23    0.84
   1   3  -7    8.26    0.79
   1   3  -7    8.17    0.86
   1   3   7   12.77    0.96
   1   3   7   13.05    1.18
  -1  -3   7    7.97    0.80
   2   3  -7   60.08    4.50
   2   3  -7   62.80    4.62
   2   3  -7   57.34    4.43
   2   3  -7   61.54    4.42
   2   3  -7   59.10    4.55
  -2   3   7   76.70    4.58
   2   3  -7   61.47    4.49
   2   3  -7   59.87    4.56
   2   3  -7   61.24    4.57
   2   3  -7   60.11    4.38
  -2   3   7   76.36    4.48
  -2   3   7   79.36    5.35
   2   3  -7   61.40    4.36
  -2  -3   7   65.17    4.37
  -2  -3   7   59.67    4.44
  -2  -3   7   60.94    4.42
  -2  -3   7   61.53    4.54
  -2  -3   7   59.77    4.58
  -2  -3   7   58.17    4.65
   2  -3  -7   73.81    4.56
  -2  -3   7   64.85    4.59
  -2  -3   7   58.96    4.59
  -2  -3   7   62.11    4.56
  -2  -3   7   63.38    4.46
   2  -3  -7   76.52    4.40
  -3   3   7   56.58    4.13
  -3  -3  -7   54.72    4.60
  -3   3   7   55.87    4.31
  -3  -3  -7   64.81    4.26
  -3   3   7   58.09    4.22
  -3   3   7   55.07    4.89
  -3  -3  -7   55.19    4.19
  -3  -3  -7   59.13    4.39
  -3   3   7   58.31    4.18
  -3  -3  -7   61.54    4.34
  -3   3   7   53.81    4.19
  -3   3   7   56.61    4.00
  -3  -3  -7   62.34    4.41
  -3  -3  -7   59.13    4.35
  -3  -3  -7   55.91    4.29
  -3  -3  -7   62.47    4.14
   3   3   7   60.12    4.31
   3  -3  -7   64.54    4.31
   3  -3  -7   61.05    4.22
   3  -3  -7   59.49    4.08
   3   3   7   56.60    4.38
   3   3   7   58.96    4.96
   3   3   7   56.93    4.25
   3  -3  -7   57.73    4.26
   3  -3  -7   56.63    4.51
   3  -3  -7   55.07    4.19
   3   3   7   67.86    4.42
   3   3   7   60.91    4.40
   3   3   7   66.85    4.25
   3  -3  -7   60.84    4.20
   3  -3  -7   58.69    4.05
   3   3   7   60.87    4.36
  -4  -3  -7   62.73    4.66
  -4  -3  -7   66.15    4.73
  -4  -3  -7   61.73    4.51
  -4  -3  -7   66.25    4.82
  -4  -3  -7   63.18    5.04
  -4  -3  -7   67.60    4.77
   4   3   7   59.85    5.34
   4   3   7   62.29    4.76
   4   3   7   65.78    4.72
   4   3   7   61.05    4.64
   6   3  -7    1.64    0.42
   6   3  -7    1.25    0.39
  -6   3   7    2.68    0.48
  -6   3   7    2.72    0.55
  -6   3   7    2.45    0.44
  -6   3   7    2.88    0.44
  -6   3   7    2.47    0.43
  -6   3   7    2.60    0.46
  -6   3   7    2.73    0.46
  -6   3   7    3.09    0.47
   6   3  -7    1.64    0.40
  -6   3   7    2.81    0.62
   6   3  -7    1.49    0.40
  -6  -3   7    1.58    0.31
  -6  -3   7    1.35    0.43
  -6  -3   7    2.30    0.46
  -6  -3   7    1.64    0.36
   6  -3  -7    2.24    0.40
  -6  -3   7    1.96    0.49
  -6  -3   7    2.10    0.47
   6  -3  -7    3.06    0.47
   7  -3   7    0.80    0.42
  -7   3   7    0.30    0.26
  -7   3   7    0.04    0.25
   7  -3   7    0.59    0.33
  -7   3   7    0.25    0.28
   7   3  -7    0.13    0.29
  -7   3   7    0.12    0.32
  -7   3  -7    0.85    0.35
  -7   3  -7    0.84    0.41
  -7  -3   7   -0.07    0.30
  -7   3  -7    0.78    0.41
  -7   3  -7    0.68    0.39
  -7   3  -7    0.11    0.48
   7  -3  -7    0.10    0.24
  -7  -3   7    0.08    0.36
  -8   3  -7   14.64    1.62
  -8   3  -7   15.46    2.06
  -8   3  -7   13.38    1.38
   9   3  -7   17.89    1.81
   0   4  -7    0.61    0.19
   0   4  -7    0.76    0.22
   0  -4   7    1.22    0.26
   0  -4   7    1.28    0.22
   0  -4   7    1.54    0.28
   0   4  -7    0.97    0.21
   0   4  -7    1.15    0.23
   0  -4   7    0.67    0.20
   0   4  -7    0.56    0.18
  -1   4   7   40.19    3.27
  -1   4   7   36.52    3.77
   1  -4   7   49.26    3.26
  -1   4   7   39.08    3.20
   1  -4   7   50.11    3.12
  -1   4   7   36.85    3.24
   1  -4   7   47.76    3.56
   1  -4   7   46.35    3.34
  -1   4   7   40.62    3.21
   1  -4   7   49.58    3.21
  -1   4   7   45.91    3.38
  -1   4  -7   46.93    3.18
  -1   4  -7   50.67    3.32
   1  -4  -7   41.28    3.23
  -1   4  -7   46.59    3.25
  -1   4  -7   49.55    3.78
  -1   4  -7   46.30    3.24
  -1   4  -7   47.30    3.10
  -1   4  -7   47.36    3.20
   1  -4  -7   37.56    3.14
   1  -4  -7   39.71    3.27
  -1   4  -7   51.22    3.34
  -3  -4  -7  174.18   12.96
   3   4  -7  176.70   12.86
   3  -4   7  190.76   13.16
   3  -4   7  210.52   13.04
   3   4  -7  189.96   12.97
   3   4  -7  188.16   13.22
   3  -4   7  193.53   13.33
   3   4  -7  185.86   12.86
  -3  -4  -7  202.08   13.03
   3   4  -7  192.46   13.17
   3  -4   7  203.45   12.83
   3   4  -7  187.38   13.09
   3  -4   7  192.75   13.22
  -3  -4  -7  178.91   13.20
   3  -4   7  194.22   14.78
  -3  -4  -7  181.81   13.30
  -3  -4  -7  190.01   13.37
   3   4  -7  176.70   13.09
   3   4  -7  178.45   13.19
   3  -4   7  207.44   13.72
  -3  -4   7  172.07   13.39
   3   4   7  194.51   13.36
  -3  -4   7  181.20   13.14
   3   4   7  182.54   13.16
   3   4   7  179.43   15.02
  -3   4  -7  195.95   12.89
  -3   4  -7  202.89   13.36
  -3  -4   7  196.20   12.94
  -3  -4   7  179.82   12.90
  -3   4  -7  187.35   12.43
   3   4   7  192.53   13.27
   3   4   7  189.14   13.29
  -3   4  -7  199.29   13.07
  -3  -4   7  193.40   13.28
  -3   4  -7  190.62   12.93
  -3  -4   7  180.19   12.74
  -3  -4   7  185.02   13.56
  -3  -4   7  189.21   12.47
  -3  -4   7  202.77   12.55
  -3   4  -7  195.53   13.73
  -3   4  -7  191.70   13.08
  -3  -4   7  200.28   13.18
  -3  -4   7  177.79   13.25
  -3  -4   7  188.71   13.10
   3   4   7  175.11   12.95
   3   4   7  201.59   12.98
   4   4  -7  250.77   16.28
   4   4  -7  247.06   16.56
   4   4  -7  243.72   16.71
   4   4  -7  239.07   16.28
   4   4  -7  252.24   16.62
   4   4  -7  236.54   16.68
   4   4  -7  248.52   16.56
  -4  -4   7  227.74   16.28
  -4  -4   7  236.95   16.11
  -4  -4   7  229.52   16.71
  -4  -4   7  223.23   16.91
  -4  -4   7  241.57   16.56
  -4  -4   7  236.21   16.58
  -4  -4   7  243.89   16.74
  -5  -4  -7   16.70    1.74
  -5   4   7   21.94    1.65
  -5   4   7   21.79    1.60
  -5  -4  -7   16.49    1.59
  -5   4   7   22.71    1.68
  -5  -4  -7   19.02    1.82
  -5   4   7   23.01    1.58
  -5   4   7   23.02    1.68
  -5  -4  -7   17.04    1.70
  -5   4   7   22.89    1.65
  -5   4   7   22.93    1.60
   5  -4  -7   22.64    1.67
   5   4   7   16.72    1.71
   5   4   7   18.31    1.76
   5   4   7   16.59    1.69
   5   4   7   16.85    2.02
   5   4   7   17.04    1.80
   5  -4  -7   22.68    1.62
  -6   4   7    5.64    0.66
  -6   4   7    5.55    0.64
  -6   4   7    5.79    0.67
  -6   4   7    5.28    0.82
  -6   4   7    5.08    0.62
   6  -4   7    5.29    0.80
  -6   4   7    5.66    0.69
  -6   4   7    4.97    0.65
   6  -4   7    4.83    0.67
  -6   4   7    5.26    0.62
  -6   4  -7    5.10    0.73
  -6   4  -7    5.77    0.75
  -6   4  -7    4.22    0.62
   6  -4  -7    5.41    0.62
  -6   4  -7    4.74    0.89
  -6   4  -7    5.12    1.02
   6  -4  -7    5.27    0.66
  -6   4  -7    4.83    0.73
   7  -4   7    4.96    0.72
   7  -4   7    4.78    0.81
  -7   4  -7    4.63    0.67
   7   4   7    5.79    0.99
  -7   4  -7    4.88    1.09
   7   4   7    5.76    1.04
  -7   4  -7    5.34    0.81
   7   4   7    5.65    0.83
  -7   4  -7    4.62    0.78
   7   4   7    6.00    0.94
  -7   4  -7    4.72    0.78
  -8   4   7   21.78    1.95
  -8   4   7   22.54    2.38
  -8   4   7   23.52    2.00
  -8   4   7   24.55    1.99
  -8   4   7   22.73    1.93
   8  -4  -7   21.87    1.95
   8  -4  -7   22.24    2.01
  -1  -5  -7   79.21    5.74
  -1  -5  -7   88.86    5.91
  -1  -5  -7   80.57    5.87
  -1  -5  -7   82.92    5.95
  -1  -5  -7   79.92    5.72
  -1  -5  -7   80.33    5.91
   1   5   7   86.33    5.91
   1   5   7   82.03    5.61
   1   5   7   74.78    6.74
   1   5   7   81.36    5.90
   1   5   7   86.78    5.83
   1   5   7   85.00    5.83
   1   5   7   79.27    5.67
   1   5   7   82.31    5.83
   1   5   7   82.42    5.80
   2  -5   7  105.14    7.20
   2  -5   7  100.93    7.32
   2  -5   7  102.32    7.30
   2  -5   7  111.82    7.61
   2  -5   7   97.45    7.43
   2  -5   7  114.57    7.33
  -2   5  -7   98.96    7.58
  -2   5  -7  100.97    8.45
  -2   5  -7  113.91    7.22
  -2   5  -7  109.44    7.43
  -2   5  -7  101.39    7.27
  -2   5  -7  106.87    7.31
  -2   5  -7   97.43    6.92
  -2   5  -7  100.91    7.17
  -3   5   7  191.79   12.66
   3  -5   7  198.34   13.31
  -3   5   7  173.51   12.47
  -3   5   7  182.99   12.93
  -3   5   7  177.76   12.64
   3  -5   7  178.91   12.78
  -3   5   7  174.44   14.54
   3  -5   7  186.97   14.30
  -3   5   7  186.11   12.53
  -3   5   7  181.03   12.04
   3  -5   7  182.30   12.74
  -3   5  -7  175.51   14.65
   3  -5  -7  203.74   12.64
  -3   5  -7  181.51   12.67
  -3   5  -7  174.66   12.52
  -3   5  -7  184.29   12.65
   3  -5  -7  175.49   12.73
   3  -5  -7  186.31   12.26
   3  -5  -7  193.02   12.40
  -3   5  -7  169.91   12.03
  -3   5  -7  189.99   12.91
   3  -5  -7  189.75   12.80
  -3   5  -7  180.12   13.29
  -3   5  -7  189.97   12.50
  -4   5   7  105.87    7.33
  -4   5   7  104.97    7.33
  -4   5   7  107.15    8.56
  -4   5   7  110.88    6.99
  -4   5   7  112.98    7.30
  -4   5   7  110.32    7.24
  -4   5   7  112.83    7.50
   4  -5   7  100.29    7.46
   4  -5   7  102.87    7.39
   4  -5  -7  109.11    7.37
   4  -5  -7  111.15    7.43
  -4   5  -7   96.37    7.79
  -4   5  -7  102.78    7.25
  -4   5  -7   97.52    7.00
  -4   5  -7   99.87    7.31
  -4   5  -7   95.25    8.64
  -4   5  -7  102.12    7.37
   5   5  -7   25.88    2.13
   5   5  -7   26.96    2.07
   5   5  -7   26.77    2.20
   5   5  -7   25.82    2.16
  -5  -5   7   27.66    2.25
  -5  -5   7   25.70    2.18
  -5  -5   7   28.85    2.26
  -5  -5   7   24.97    2.29
  -5  -5   7   26.24    2.16
  -5  -5   7   26.60    2.22
  -5  -5   7   27.45    2.08
  -6   5   7    0.09    0.22
   6  -5   7    0.88    0.32
  -6   5   7    0.11    0.21
  -6   5   7    0.19    0.18
  -6  -5  -7    1.97    0.62
  -6  -5  -7    1.81    0.46
   6  -5   7    0.73    0.38
  -6   5   7    0.27    0.22
  -6   5   7    0.13    0.20
  -6  -5   7    2.01    0.44
  -6  -5   7    2.14    0.48
  -6   5  -7    0.68    0.32
  -6   5  -7    0.64    0.30
   6  -5  -7    0.24    0.22
  -6   5  -7    0.82    0.31
  -6   5  -7    0.66    0.32
   6   5   7    2.40    0.70
  -6   5  -7    0.82    0.35
  -6  -5   7    2.31    0.54
   6   5   7    2.29    0.58
   6   5   7    2.26    0.61
  -6   5  -7    0.46    0.44
  -6   5  -7    0.72    0.32
  -8   5   7   30.60    3.04
  -8   5   7   31.11    2.51
  -8   5   7   31.80    2.43
  -8   5   7   31.33    2.51
   8  -5  -7   30.64    2.57
   8  -5  -7   30.16    2.51
   0   6  -7   27.69    2.10
   0   6  -7   25.51    2.03
   0   6  -7   24.62    2.00
   0  -6   7   25.51    2.00
   0   6  -7   28.17    2.02
   0   6  -7   26.67    1.99
   0   6  -7   25.74    2.28
   0  -6   7   24.80    1.94
   0  -6   7   24.92    2.01
   0  -6   7   29.50    2.06
   0  -6   7   27.79    1.92
   0  -6   7   25.70    2.05
   0   6  -7   24.28    1.92
   0  -6   7   28.59    2.03
   0  -6   7   27.54    2.03
   1   6  -7   17.45    1.60
   1   6  -7   17.20    1.65
   1  -6   7   21.74    1.59
   1  -6   7   21.01    1.66
   1   6  -7   18.46    1.71
   1  -6   7   23.64    1.58
   1  -6   7   23.52    1.62
   1  -6   7   23.19    1.48
  -1  -6   7   16.83    1.62
  -1   6  -7   21.59    1.62
  -1   6  -7   20.76    1.53
  -1   6  -7   21.12    1.61
  -1   6  -7   23.45    1.62
  -1  -6   7   17.07    1.54
  -1   6  -7   21.29    1.58
  -1   6  -7   22.66    1.95
  -1  -6   7   16.76    1.63
  -1   6  -7   23.54    1.66
   2   6  -7   44.80    3.25
   2   6  -7   43.11    3.29
   2   6  -7   45.12    3.40
   2   6  -7   43.61    3.34
   2   6  -7   48.06    3.22
  -2  -6   7   44.74    3.31
  -2  -6   7   45.30    3.35
  -2  -6   7   43.04    3.22
  -2  -6   7   45.45    3.23
  -4  -6  -7    7.19    0.90
  -4   6   7    6.86    0.72
   4   6  -7    6.96    0.72
  -4   6   7    8.28    0.74
   4   6  -7    7.78    0.89
  -4   6   7    6.40    0.94
  -4  -6  -7    6.50    0.87
   4   6  -7    7.96    0.81
   4   6  -7    7.15    0.70
   4   6  -7    7.32    0.77
  -4  -6  -7    7.74    0.98
  -4  -6  -7    7.28    0.83
  -4   6   7    6.58    0.70
  -4   6   7    6.52    0.67
  -4   6   7    7.78    0.71
  -4  -6  -7    7.33    1.06
  -4   6   7    6.83    0.70
   4   6   7    7.65    0.87
   4  -6  -7    7.15    0.67
  -4  -6   7    8.09    0.78
  -4  -6   7    6.63    0.85
   4  -6  -7    6.94    0.72
  -4  -6   7    7.32    0.84
  -4  -6   7    6.92    0.82
  -4  -6   7    7.11    0.82
  -4  -6   7    7.60    0.82
   4   6   7    7.02    0.73
  -4  -6   7    6.79    0.74
   4   6   7    7.24    0.84
   4   6   7    7.03    1.07
   5   6  -7    3.93    0.59
  -5  -6  -7    5.53    0.86
   5   6  -7    4.61    0.69
   5   6  -7    3.85    0.62
   5  -6   7    6.77    0.75
  -5  -6  -7    4.76    0.67
   5   6  -7    3.84    0.55
  -5  -6  -7    5.40    0.93
  -5  -6  -7    4.98    0.73
  -5  -6  -7    5.86    0.82
  -5  -6   7    3.60    0.64
  -5   6  -7    6.17    0.68
  -5  -6   7    4.35    0.68
  -5  -6   7    3.96    0.59
  -5   6  -7    6.28    0.65
   5   6   7    5.45    0.99
   5   6   7    4.56    0.80
   5   6   7    5.22    0.79
  -5   6  -7    5.79    0.61
  -5  -6   7    4.25    0.68
  -5   6  -7    6.12    1.02
  -5  -6   7    3.63    0.69
  -5  -6   7    4.05    0.65
  -5  -6   7    3.78    0.66
   5   6   7    5.93    0.77
   5   6   7    5.48    0.64
  -5   6  -7    6.70    0.84
  -6  -6  -7    3.41    0.85
  -6  -6  -7    2.83    0.66
   6   6  -7    2.83    0.54
  -6  -6  -7    2.79    0.61
   6   6  -7    3.56    0.65
   6   6  -7    3.09    0.53
   6   6  -7    3.20    0.60
  -6  -6   7    3.44    0.70
  -6  -6   7    4.09    0.67
   6   6   7    3.25    0.86
  -6  -6   7    3.96    0.71
  -6  -6   7    3.38    0.66
   6   6   7    3.42    0.71
  -6  -6   7    3.09    0.52
   6   6   7    2.71    0.60
  -6  -6   7    3.85    0.67
   7  -6   7    3.29    0.56
   7  -6   7    2.96    0.66
  -7   6  -7    3.01    0.52
  -7   6  -7    2.63    0.56
  -7   6  -7    1.99    0.79
  -8   6   7   18.37    1.53
  -8   6   7   17.49    1.49
  -8   6   7   17.08    1.58
   8  -6  -7   17.92    1.61
   8  -6  -7   17.58    1.65
   0  -7   7    8.05    0.74
   0  -7   7    7.67    0.67
   0   7  -7    7.71    0.79
   0  -7   7    7.21    0.74
   0  -7   7    8.27    0.64
   0   7  -7    7.91    0.76
   0  -7   7    7.24    0.75
   0   7  -7    8.27    0.84
   0  -7   7    8.27    0.78
   0  -7   7    7.88    0.78
   0   7  -7    7.75    0.76
   0   7  -7    7.65    0.75
   0   7  -7    7.36    0.75
   0   7  -7    8.14    0.89
   1   7  -7   14.56    1.25
   1   7  -7   15.24    1.33
   1   7  -7   13.63    1.25
   1   7  -7   14.32    1.25
  -1  -7   7   14.24    1.25
  -1  -7   7   15.01    1.27
  -1  -7   7   15.74    1.19
  -1  -7   7   15.01    1.29
  -1  -7   7   13.51    1.19
  -1  -7   7   14.58    1.27
  -2   7   7   25.09    1.84
  -2   7   7   25.86    1.90
  -2   7   7   24.27    1.89
  -2   7   7   24.51    1.93
  -2   7   7   24.14    2.32
  -2   7   7   22.70    1.90
   2  -7  -7   22.33    1.82
   2  -7  -7   23.37    1.90
   2  -7  -7   25.20    1.91
   3  -7   7   28.14    2.23
   3  -7   7   27.98    2.25
   3   7  -7   30.46    2.41
  -3  -7  -7   35.98    2.66
  -3  -7  -7   36.67    2.63
  -3  -7  -7   34.99    2.60
   3   7  -7   30.62    2.47
   3   7  -7   32.43    2.33
  -3  -7  -7   35.88    2.50
  -3   7  -7   27.49    2.25
  -3  -7   7   31.47    2.38
   3   7   7   34.94    3.04
  -3   7  -7   27.40    2.23
  -3  -7   7   32.56    2.34
  -3   7  -7   27.44    2.82
  -3  -7   7   31.74    2.51
  -3  -7   7   28.01    2.40
  -3  -7   7   29.06    2.43
  -3   7  -7   26.70    2.27
  -3  -7   7   30.69    2.44
  -3  -7   7   32.06    2.34
  -3   7  -7   25.79    2.13
  -3   7  -7   29.14    2.25
  -4  -7  -7   11.81    1.29
  -4  -7  -7   12.21    1.44
  -4  -7  -7   10.84    1.18
  -4  -7  -7   13.57    1.38
  -4  -7  -7   11.77    1.30
  -4  -7  -7   13.02    1.39
   4   7   7   11.06    0.97
   4   7   7   12.37    1.59
   4   7   7   14.14    1.21
  -5  -7  -7    5.34    1.00
  -5   7   7    8.04    0.76
  -5   7   7    8.44    0.80
  -5   7   7    8.75    0.75
  -5   7   7    8.49    0.74
  -5  -7  -7    5.41    0.90
  -5   7   7    8.40    0.76
  -5  -7  -7    6.14    0.98
  -5   7   7    7.81    0.74
  -5  -7  -7    5.91    1.09
   5   7   7    5.96    0.89
   5  -7  -7    9.34    0.76
   5  -7  -7    8.66    0.84
   5   7   7    6.25    1.16
   6   7  -7    2.25    0.47
   6   7  -7    2.03    0.46
  -6  -7   7    2.92    0.62
  -6  -7   7    2.54    0.64
  -6  -7   7    2.57    0.65
  -6  -7   7    2.54    0.63
  -6  -7   7    2.53    0.58
  -6  -7   7    2.60    0.51
   7   7  -7    4.93    0.78
  -7  -7   7    6.69    0.94
  -7  -7   7    6.89    0.99
  -7  -7   7    5.58    1.04
   1  -8   7   28.24    2.10
   1  -8   7   26.22    2.02
   1  -8   7   27.93    2.11
  -1   8  -7   27.27    2.51
  -1   8  -7   26.45    2.09
  -1   8  -7   27.56    2.12
  -1   8  -7   27.36    2.08
  -1   8  -7   28.85    2.09
  -1   8  -7   27.54    2.03
  -2   8   7   72.06    5.44
  -2   8   7   72.99    5.74
  -2   8   7   73.05    6.69
  -2   8   7   77.20    5.69
  -2   8   7   71.54    5.72
  -2   8   7   73.39    5.67
   2  -8   7   92.59    5.74
  -2   8  -7   94.45    5.73
  -2   8  -7   92.07    5.66
  -2   8  -7   88.59    5.43
  -2   8  -7   91.81    5.74
   2  -8  -7   70.10    5.56
   2  -8  -7   73.10    5.79
   2  -8  -7   76.28    5.79
  -2   8  -7   92.81    6.77
   3   8  -7   41.89    3.26
   3   8  -7   42.97    3.23
  -3  -8   7   38.84    3.20
  -3  -8   7   42.31    3.12
  -3  -8   7   38.47    3.23
  -3  -8   7   43.01    3.24
  -3  -8   7   42.84    3.32
  -3  -8   7   41.82    3.15
  -4   8   7   18.95    1.55
  -4   8   7   19.81    1.46
  -4   8   7   19.59    1.53
  -4   8   7   17.73    1.50
  -4   8   7   18.41    1.51
  -4   8   7   19.05    1.99
   4  -8  -7   19.11    1.51
   4  -8  -7   19.53    1.55
  -5  -8  -7   17.74    1.91
  -5  -8  -7   17.63    1.81
  -5   8   7   14.33    1.22
  -5   8   7   14.41    1.27
  -5   8   7   14.93    1.29
  -5  -8  -7   16.82    1.67
  -5  -8  -7   17.34    1.74
  -5   8   7   15.19    1.27
  -5   8   7   16.61    1.24
  -5   8   7   14.67    1.34
   5  -8  -7   16.89    1.39
   5   8   7   18.79    2.09
  -6   8   7    0.61    0.22
  -6   8   7    0.77    0.22
  -6   8   7    0.48    0.25
  -6   8   7    0.49    0.26
  -6   8   7    0.58    0.24
  -6   8   7    0.64    0.22
  -6  -8   7    2.46    0.65
  -6   8  -7    0.57    0.28
  -6   8  -7    0.09    0.22
  -6   8  -7    0.26    0.49
  -6   8  -7    0.24    0.21
  -6   8  -7    0.12    0.24
  -7   8   7    6.32    0.78
  -7   8   7    7.43    0.87
   7   8  -7    8.07    0.90
  -7   8   7    6.58    0.69
  -7  -8   7    9.95    1.20
  -7  -8   7    9.90    1.16
   0  -9  -7    1.22    0.39
   0   9   7    1.86    0.64
   0  -9  -7    1.52    0.38
   0   9   7    1.31    0.40
   0   9   7    1.76    0.41
   0  -9  -7    1.43    0.40
  -1   9   7   30.93    2.25
  -1   9   7   29.53    2.19
  -1   9   7   30.67    2.72
  -1   9   7   29.78    2.13
  -1   9   7   29.41    2.20
   1  -9   7   24.89    2.07
  -1   9   7   25.92    2.17
   1  -9   7   24.82    2.07
   1  -9   7   24.79    2.00
   1  -9  -7   27.81    2.13
  -1   9  -7   26.09    2.51
  -1   9  -7   23.27    2.05
  -1   9  -7   25.13    2.05
  -1   9  -7   24.76    2.10
   1  -9  -7   28.85    2.22
  -1   9  -7   25.04    2.06
   1  -9  -7   30.16    2.21
  -2   9   7   54.03    3.67
   2   9  -7   44.75    3.74
   2   9  -7   46.39    3.72
  -2   9   7   51.58    3.68
  -2   9   7   51.78    3.69
  -2   9   7   50.07    3.63
  -2   9   7   53.86    3.52
  -2   9   7   52.28    4.39
   2  -9  -7   52.61    3.71
   2  -9  -7   51.70    3.58
  -2  -9   7   42.64    3.74
  -2  -9   7   45.69    3.76
  -2  -9   7   47.09    3.75
  -2  -9   7   44.12    3.61
   2  -9  -7   53.14    3.72
  -3   9   7   57.17    4.29
  -3   9   7   58.02    4.27
  -3   9   7   59.48    5.13
  -3   9   7   57.05    4.08
  -3   9   7   62.08    4.31
  -3   9   7   61.43    4.33
   3  -9  -7   62.66    4.38
   3  -9  -7   59.16    4.37
  -4   9   7   45.36    3.26
  -4   9   7   43.28    3.19
  -4   9   7   43.71    3.19
  -4   9   7   42.01    3.03
  -4   9   7   43.06    3.22
  -4   9   7   48.40    4.03
   4  -9  -7   43.49    3.28
  -5   9   7    7.34    0.71
  -5   9   7    8.90    0.73
  -5  -9  -7    8.21    1.15
  -5   9   7    7.83    0.69
  -5   9   7    8.45    0.70
  -5   9   7    7.78    0.84
  -5  -9  -7   10.07    1.35
  -5   9   7    7.15    0.78
  -6   9   7    1.53    0.35
  -6   9   7    1.78    0.39
  -6   9   7    2.12    0.27
  -6  -9   7    0.96    0.55
  -6   9  -7    2.83    0.49
  -6   9  -7    2.18    0.76
  -6  -9   7    0.80    0.49
  -6  -9   7    0.66    0.44
   0  10  -7    2.79    0.46
   0 -10   7    2.68    0.45
   0 -10   7    2.91    0.47
   0  10  -7    4.18    0.60
   0  10  -7    2.73    0.47
   0  10  -7    3.09    0.50
   1 -10   7   17.74    1.48
   1 -10   7   17.81    1.47
   1 -10   7   17.79    1.42
  -1  10  -7   17.07    1.45
  -1  10  -7   17.00    1.47
  -1  10  -7   17.82    1.50
  -1  10  -7   17.38    1.46
   2  10  -7   37.80    2.77
   2  10  -7   39.59    2.80
   2 -10   7   31.62    2.51
   2 -10   7   30.74    2.51
   2 -10   7   31.29    2.42
  -2  10  -7   30.87    2.47
  -2 -10   7   36.83    2.74
  -2  10  -7   33.60    3.14
  -2 -10   7   36.53    2.75
  -2 -10   7   36.28    2.76
  -2  10  -7   29.89    2.47
  -2  10  -7   31.99    2.50
  -2  10  -7   31.58    2.49
  -3  10   7    8.09    0.93
  -3  10   7    8.06    0.91
  -3 -10  -7   11.64    1.30
  -3 -10  -7   12.05    1.32
  -3 -10  -7   11.44    1.26
  -3  10   7    7.98    0.85
   3  10   7   11.64    1.66
  -3  10  -7   14.09    1.48
   3 -10  -7    8.15    0.97
  -4  10   7   11.16    1.00
  -4  10   7   12.40    1.02
  -4  10   7   12.08    0.97
  -4  10   7   12.28    1.12
  -4  10   7   11.98    1.09
  -5  10  -7    9.37    0.90
  -5  10  -7    8.53    1.39
  -5  10  -7    9.29    0.93
  -6 -10   7   -0.30    0.37
  -6 -10   7    0.00    0.49
   0 -11  -7    5.27    0.74
   0  11   7    4.35    0.74
   0  11  -7    3.82    0.64
   0  11  -7    4.00    0.58
   0  11  -7    4.08    0.63
   0 -11   7    3.57    0.58
   0  11   7    4.99    0.78
   0 -11  -7    4.60    0.74
   0  11   7    5.77    1.03
   0 -11   7    4.06    0.61
   1 -11   7    8.78    0.88
   1 -11   7    7.95    0.85
  -1  11  -7    8.61    0.88
  -1  11  -7    7.66    0.85
  -1  11  -7    7.91    0.83
  -1  11  -7    7.98    0.86
  -2 -11  -7   10.70    1.29
   2  11  -7    9.29    1.17
  -2 -11  -7   10.69    1.29
   2 -11   7   11.03    1.01
   2  11  -7    8.57    1.12
   2  11   7   13.11    1.82
  -2  11  -7   12.32    1.04
  -2 -11   7    9.15    1.14
  -2  11  -7   11.33    0.98
  -2  11  -7   10.90    1.01
  -2  11  -7   11.36    1.00
  -3  11   7    3.68    0.57
  -3  11   7    3.41    0.54
  -3  11   7    3.67    0.53
  -3 -11  -7    4.06    0.83
  -3  11   7    3.27    0.50
  -3  11   7    3.67    0.59
  -3  11  -7    3.89    0.52
  -3  11  -7    3.85    0.87
   3  11   7    4.89    1.23
   3 -11  -7    3.30    0.59
  -3  11  -7    3.98    0.50
  -4  11  -7    4.72    0.57
  -4  11  -7    4.86    0.58
  -4  11  -7    4.48    1.01
  -5 -11   7    3.02    0.72
   0 -12  -7    1.22    0.49
   0  12  -7    0.00    0.25
   0 -12   7    0.09    0.27
   0 -12   7   -0.07    0.27
   0  12   7    1.29    0.50
   0  12   7    1.05    0.49
   0  12  -7   -0.10    0.25
   1 -12   7    5.80    0.73
  -1  12   7    5.06    0.81
   1 -12   7    5.99    0.77
  -1  12  -7    5.88    0.75
  -1  12  -7    6.18    0.70
   1 -12  -7    5.83    0.81
  -1  12  -7    5.55    0.74
   1 -12  -7    5.74    0.84
  -1  12  -7    6.84    0.76
   2  12  -7    9.70    1.16
  -2  12   7   11.69    1.14
  -2  12   7   11.63    1.07
   2 -12  -7   10.61    1.15
  -2 -12   7    8.32    1.13
  -2 -12   7    7.97    1.10
   0 -13   7    7.34    0.96
   0  13  -7    7.90    1.00
   0 -13   7    8.34    1.02
   1  13  -7    8.06    1.07
  -1 -13   7    7.41    0.99
   0   0  -8   46.39    3.33
   0   0  -8   46.33    3.40
   0   0   8   46.38    3.33
   0   0  -8   46.23    3.39
   0   0  -8   46.79    3.41
   0   0   8   46.17    3.40
   0   0   8   51.11    3.32
   0   0   8   45.26    3.30
   0   0   8   47.09    3.42
   0   0  -8   45.43    3.22
   0   0   8   45.58    3.49
   0   0   8   46.29    3.38
   0   0   8   46.49    3.87
   0   0  -8   45.66    3.36
   0   0  -8   49.26    3.34
   0   0  -8   46.80    3.28
   0   0  -8   45.49    3.28
   0   0   8   47.54    3.24
   0   0  -8   46.84    3.39
   0   0   8   47.28    3.40
   0   0   8   43.77    3.36
  -1   0   8  131.31    9.24
   1   0  -8  145.47    9.57
   1   0  -8  137.03    9.41
  -1   0   8  146.28    9.39
  -1   0   8  135.86    9.64
   1   0  -8  138.60    9.56
  -1   0   8  145.06    9.55
   1   0  -8  135.05    9.52
   1   0  -8  143.97    9.39
   1   0  -8  136.30    9.64
  -1   0   8  138.01   10.88
  -1   0   8  130.46    9.37
  -1   0   8  135.17    9.40
  -1   0   8  132.78    9.54
  -1   0   8  133.10    9.61
   1   0  -8  143.29    9.43
  -1   0   8  139.72    9.53
  -1   0   8  136.80    9.42
  -1   0   8  132.81    9.76
  -1   0   8  142.58    9.08
   1   0  -8  133.04    9.64
   2   0   8  220.37   18.45
  -2   0  -8  221.51   18.07
  -2   0   8  296.40   18.00
  -2   0   8  290.63   18.25
  -2   0   8  285.10   18.44
   2   0  -8  290.57   17.74
  -2   0  -8  243.29   18.43
   2   0   8  222.47   20.77
  -2   0   8  284.20   18.29
   2   0  -8  290.55   17.39
   2   0  -8  295.93   19.08
  -2   0   8  288.83   18.69
   2   0  -8  281.03   18.45
   2   0  -8  291.01   18.03
   2   0  -8  281.73   18.49
   2   0   8  228.78   18.30
  -2   0   8  296.51   18.49
  -2   0   8  280.46   20.83
  -2   0   8  284.83   17.75
   2   0   8  246.41   18.27
  -2   0  -8  239.16   18.30
  -2   0  -8  228.93   18.44
   2   0   8  228.14   18.71
  -2   0  -8  224.76   18.26
  -2   0   8  277.57   18.01
   2   0  -8  290.31   18.24
   2   0  -8  300.39   18.35
  -2   0   8  286.49   18.05
   2   0   8  235.18   18.28
  -3   0   8  121.15    9.41
   3   0   8  153.85    9.61
   3   0  -8  127.85    9.38
  -3   0   8  124.04    9.35
  -3   0  -8  148.74    9.13
   3   0  -8  119.00    9.44
   3   0  -8  130.26    9.78
   3   0  -8  122.67    8.90
  -3   0   8  116.57   10.68
   3   0  -8  125.57    9.19
  -3   0  -8  159.22    9.34
  -3   0  -8  148.10    9.13
  -3   0  -8  153.39    8.98
  -3   0   8  127.38    8.89
  -3   0  -8  159.60    9.45
  -3   0  -8  153.16    9.95
   3   0   8  155.38   10.75
  -3   0   8  119.71    9.21
   3   0  -8  126.64    9.33
  -3   0   8  120.53    9.13
   3   0   8  158.12    9.37
  -3   0   8  116.32    9.38
   3   0   8  149.85    9.41
   3   0   8  157.10    9.74
  -3   0   8  121.27    9.28
  -3   0   8  119.62    9.04
   3   0  -8  127.89    9.06
  -3   0   8  116.03    9.54
  -3   0   8  124.73    9.25
  -3   0   8  126.77    9.34
   3   0   8  152.02    9.53
  -4   0   8  186.90   14.53
   4   0  -8  194.43   14.35
  -4   0   8  202.93   14.22
   4   0  -8  208.63   14.02
  -4   0   8  201.35   14.25
  -4   0   8  205.84   13.78
  -4   0   8  207.68   14.33
  -4   0   8  211.45   14.12
  -4   0   8  199.82   14.05
   4   0  -8  193.97   14.38
  -4   0   8  217.79   13.56
   4   0  -8  214.85   14.93
   4   0  -8  217.47   14.21
  -4   0   8  194.40   13.56
  -4   0   8  214.67   14.32
   4   0  -8  204.42   14.27
   4   0  -8  224.97   13.85
  -4   0   8  207.07   14.89
  -4   0   8  210.43   14.13
  -5   0   8   23.49    2.04
   5   0  -8   22.66    1.90
   5   0   8   30.12    2.18
   5   0  -8   24.10    1.84
   5   0  -8   22.06    1.89
   5   0  -8   26.20    1.88
  -5   0   8   23.68    1.92
  -5   0   8   23.69    1.94
  -5   0   8   23.27    1.88
  -5   0   8   22.41    1.97
  -5   0   8   23.88    1.81
  -5   0   8   23.14    1.87
  -5   0   8   22.96    1.97
  -5   0   8   23.08    1.83
   5   0  -8   21.74    1.91
  -6   0   8   70.46    5.28
  -6   0   8   73.40    5.84
  -6   0   8   67.89    5.38
   6   0  -8   70.70    5.28
  -6   0   8   74.58    5.58
  -6   0   8   71.17    5.08
   6   0  -8   74.06    5.28
   6   0  -8   75.67    5.15
   6   0  -8   70.52    5.32
  -6   0   8   71.58    5.19
   8   0  -8   29.08    2.43
   8   0  -8   25.61    2.42
  -8   0   8   28.44    2.51
   8   0  -8   29.35    2.44
   9   0  -8   12.54    1.42
   9   0  -8   12.62    1.41
   0   1  -8  100.10    6.46
   0  -1   8  103.30    6.46
   0  -1   8   95.69    6.62
   0   1  -8   98.24    6.15
   0   1   8   86.75    6.42
   0   1  -8   94.51    6.47
   0   1   8   85.82    6.48
   0   1   8   84.35    6.43
   0   1  -8   96.35    6.41
   0   1   8   82.39    6.31
   0   1   8   88.96    6.36
   0   1  -8   96.05    6.28
   0  -1   8   93.57    6.35
   0  -1   8  102.16    6.15
   0   1   8   88.61    6.14
   0  -1   8   97.24    6.45
   0  -1  -8   85.12    6.32
   0  -1  -8   89.88    6.32
   0  -1  -8   83.99    6.50
   0   1  -8   97.93    6.49
   0  -1   8   91.99    6.51
   0  -1   8  100.13    7.34
   0   1   8   85.18    6.61
   0   1   8   86.64    7.37
   0   1   8   91.46    6.31
   0  -1  -8   89.52    6.44
   0   1  -8   94.39    6.29
   0  -1  -8   92.00    6.46
   0  -1  -8   90.06    6.36
   0  -1  -8   85.61    6.43
   0  -1  -8   86.97    6.50
   0  -1   8   92.78    6.50
   0   1   8   85.27    6.49
   0  -1   8   94.93    6.46
   0   1   8   86.07    6.43
   0  -1   8   92.75    6.31
   0   1  -8   95.53    6.36
   0   1   8   94.27    6.37
   2  -1   8  127.37    8.16
   2  -1   8  119.81    8.20
   2  -1   8  127.62    9.21
   2  -1   8  122.77    7.97
   2  -1   8  125.02    8.34
  -2  -1  -8   98.48    7.90
   2   1   8   93.37    7.67
   2   1   8   98.23    8.07
  -2   1  -8  123.33    8.46
   2   1   8   95.53    7.87
  -2   1  -8  123.67    7.83
  -2   1  -8  121.05    7.70
  -2   1  -8  126.10    8.14
  -2   1  -8  128.81    7.99
   2   1   8   95.89    8.09
  -2   1  -8  120.87    7.82
  -3  -1  -8  113.78    8.54
   3  -1   8  126.75    8.65
  -3  -1  -8  113.31    9.05
  -3  -1  -8  126.17    8.49
  -3  -1  -8  122.79    8.65
  -3  -1  -8  124.62    8.69
  -3  -1  -8  118.62    8.65
   3  -1   8  128.74    8.74
   3  -1   8  128.85    9.76
  -3  -1  -8  112.86    8.37
   3  -1   8  128.19    8.57
   3  -1   8  130.70    8.49
   3  -1   8  129.46    8.84
  -3  -1  -8  114.87    8.17
  -3   1  -8  121.33    8.17
  -3   1  -8  124.74    9.03
   3   1   8  112.49    8.49
   3   1   8  117.68    8.59
  -3   1  -8  128.42    8.53
   3   1   8  118.10    9.80
   3   1   8  121.17    8.69
  -3   1  -8  131.63    8.60
   3   1   8  122.00    8.65
   3   1   8  116.79    8.74
   3   1   8  133.19    8.48
   4  -1   8   51.66    3.89
   4   1  -8   45.63    3.71
   4   1  -8   49.49    3.65
   4  -1   8   54.03    3.75
   4  -1   8   62.32    3.86
   4   1  -8   47.23    3.71
   4  -1   8   56.06    4.33
  -4  -1  -8   61.61    4.19
   4   1  -8   44.62    3.72
   4   1  -8   49.28    3.91
   4  -1   8   56.02    3.79
   4   1  -8   52.22    3.64
   4   1  -8   43.50    3.74
   4  -1   8   51.54    3.79
  -4   1  -8   56.87    3.90
  -4   1  -8   55.55    3.84
  -4   1  -8   55.02    3.82
   4   1   8   60.35    4.43
  -4  -1   8   47.92    3.74
   4   1   8   59.71    3.97
  -4   1  -8   57.34    3.74
  -4  -1   8   45.93    3.59
  -4  -1   8   45.77    3.65
  -4  -1   8   45.54    3.59
   4   1   8   62.01    3.89
  -4   1  -8   53.97    4.09
  -4  -1   8   46.74    3.56
  -4  -1   8   44.93    3.82
  -4  -1   8   47.05    3.55
  -4  -1   8   49.03    3.58
  -4  -1   8   48.04    3.67
  -4   1  -8   52.99    3.62
  -4  -1   8   46.59    3.74
  -4  -1   8   46.81    3.87
  -4  -1   8   45.48    3.71
   5   1  -8    6.90    0.75
  -5  -1  -8    6.19    0.95
   5   1  -8    7.58    0.79
  -5   1   8    7.49    0.74
  -5   1   8    7.06    0.81
   5   1  -8    7.12    0.71
  -5  -1  -8    6.04    0.58
  -5   1   8    6.23    0.74
  -5   1   8    7.05    0.73
   5   1  -8    6.67    0.75
  -5   1   8    7.34    0.86
  -5   1   8    6.19    0.75
  -5   1   8    6.15    0.73
  -5  -1  -8    5.70    0.87
  -5   1   8    7.12    0.78
  -5  -1   8    7.39    0.76
   5  -1  -8    7.04    0.73
  -5  -1   8    7.56    0.77
   5   1   8    6.24    0.84
  -5  -1   8    7.72    0.65
   5  -1  -8    7.14    0.70
  -5  -1   8    7.07    0.71
  -5  -1   8    7.27    0.72
   5  -1  -8    6.54    0.71
  -5  -1   8    7.81    0.81
   5  -1  -8    6.60    0.74
   5   1   8    5.70    0.75
   5   1   8    6.29    0.79
  -5  -1   8    6.56    0.78
  -5  -1   8    6.65    0.80
  -5  -1   8    7.20    0.72
   5  -1  -8    7.31    0.76
   5   1   8    5.08    0.89
   5   1   8    5.52    0.78
  -5  -1   8    7.51    0.84
  -5  -1   8    6.54    0.77
  -5  -1   8    7.07    0.54
  -7   1   8   35.53    2.75
  -7   1   8   36.98    3.09
  -7   1   8   34.64    2.76
  -7   1   8   35.43    3.09
  -7   1   8   34.85    2.82
  -7   1   8   34.22    2.86
   7  -1  -8   35.53    2.80
   7  -1  -8   32.64    2.80
   7  -1  -8   34.18    2.78
   8  -1   8   17.39    1.65
  -8   1   8   17.05    1.65
  -8   1   8   16.50    1.60
  -8   1   8   15.78    1.62
   8  -1  -8   15.17    1.58
   8  -1  -8   14.90    1.54
   8  -1  -8   16.46    1.58
  -8   1  -8   16.99    2.20
   9   1  -8    9.48    1.23
   9   1  -8    9.71    1.22
  -1   2   8   55.27    3.87
  -1   2   8   58.60    3.91
  -1   2   8   53.83    3.95
  -1   2   8   60.86    3.97
  -1   2   8   57.13    4.69
  -1   2   8   53.99    4.04
  -1   2   8   54.53    3.86
  -1   2   8   58.33    4.04
  -1   2   8   58.03    3.99
  -1   2   8   59.20    4.01
  -1   2   8   54.13    4.16
  -1   2   8   56.28    4.01
  -1   2   8   55.99    4.05
  -1   2   8   58.41    3.87
  -1   2   8   55.10    3.87
   1  -2  -8   58.81    4.05
   1  -2  -8   52.07    4.07
   1  -2  -8   55.38    4.10
   1  -2  -8   54.25    3.95
   1  -2  -8   57.95    3.97
   1  -2  -8   58.58    4.05
   1  -2  -8   53.21    3.84
   2   2  -8   33.49    2.65
   2  -2   8   41.48    2.73
   2  -2   8   43.23    2.81
   2   2  -8   33.83    2.70
   2   2  -8   37.26    2.72
   2   2  -8   35.05    2.74
   2   2  -8   36.30    2.77
   2   2  -8   37.06    2.64
   2   2  -8   37.33    2.76
   2  -2   8   40.77    2.83
   2  -2   8   40.65    2.78
   2  -2   8   41.97    2.69
   2   2  -8   35.87    2.63
   2   2  -8   35.10    2.93
   2  -2   8   42.79    3.14
   2   2  -8   36.73    2.70
   2   2  -8   36.00    2.74
   2   2  -8   35.97    2.74
  -2  -2   8   36.33    3.14
  -2  -2   8   34.40    2.64
  -2  -2   8   35.35    2.73
  -2  -2   8   35.40    2.76
  -2   2  -8   42.15    2.76
  -2   2  -8   42.27    2.91
  -2  -2   8   37.03    2.77
  -2  -2   8   33.93    2.80
  -2  -2   8   34.70    2.65
  -2  -2   8   34.68    2.75
  -2  -2   8   34.81    2.66
  -2  -2   8   34.40    2.73
  -2  -2   8   37.30    2.61
  -3  -2  -8   33.03    2.28
  -3  -2  -8   28.28    2.53
  -3  -2  -8   31.51    2.36
  -3  -2  -8   27.43    2.20
  -3  -2  -8   31.48    2.40
  -3  -2  -8   29.46    2.24
  -3  -2  -8   29.33    2.32
  -3  -2  -8   29.99    2.42
   3   2   8   29.54    2.36
   3   2   8   30.42    2.32
   3   2   8   27.36    2.68
   3   2   8   29.38    2.40
   3   2   8   32.76    2.37
  -4   2   8   39.54    3.32
   4   2  -8   53.93    3.62
   4   2  -8   46.43    3.46
  -4   2   8   41.17    3.37
  -4   2   8   40.56    3.99
  -4   2   8   42.78    3.24
  -4   2   8   41.00    3.41
  -4   2   8   40.61    3.47
   4   2  -8   47.98    3.50
   4   2  -8   51.66    3.38
  -4   2   8   40.74    3.39
   4   2  -8   53.92    3.39
   4   2  -8   50.25    3.48
   4   2  -8   50.45    3.46
  -4  -2   8   46.35    3.40
   4  -2  -8   38.79    3.41
   4  -2  -8   41.64    3.40
  -4  -2   8   47.72    3.55
  -4  -2   8   53.10    3.57
  -4  -2   8   51.15    3.33
  -4  -2   8   47.43    3.57
   4  -2  -8   40.35    3.38
  -4  -2   8   48.72    3.36
  -4  -2   8   49.61    3.33
  -4  -2   8   48.78    3.36
  -4  -2   8   47.47    3.46
  -4  -2   8   50.22    3.49
   4  -2  -8   44.06    3.29
  -4  -2   8   53.09    3.37
  -4  -2   8   52.00    3.42
   4  -2  -8   44.02    3.29
  -4  -2   8   49.60    3.50
  -5  -2  -8   11.52    1.00
  -5  -2  -8   10.75    0.88
  -5  -2  -8   11.02    1.33
   5   2   8   10.87    1.19
   5   2   8   11.42    1.34
   5   2   8   10.69    1.08
   5   2   8   10.27    1.10
   5   2   8   10.49    1.12
   6   2  -8   38.19    2.89
   6  -2   8   31.34    3.18
  -6   2   8   36.12    2.75
   6   2  -8   40.85    2.79
   6   2  -8   38.01    2.87
  -6   2   8   38.09    2.88
  -6   2   8   35.84    2.81
  -6   2   8   37.36    3.15
   6  -2   8   30.39    2.80
  -6   2   8   34.71    2.69
  -6   2   8   39.05    3.11
   6   2  -8   39.24    2.86
   6  -2   8   31.71    2.79
  -6   2   8   38.11    2.69
  -6   2   8   37.17    2.86
   6  -2   8   31.61    2.95
  -6  -2   8   39.54    3.00
  -6   2  -8   30.34    2.91
  -6  -2   8   40.99    2.87
  -6   2  -8   30.75    3.12
  -6   2  -8   31.14    2.88
  -6   2  -8   31.86    2.70
  -6   2  -8   29.62    3.46
  -6  -2   8   40.42    2.52
   6  -2  -8   37.08    2.80
   6  -2  -8   39.61    2.84
  -6  -2   8   37.91    2.98
  -6  -2   8   37.94    2.92
   6  -2  -8   35.66    2.82
   7  -2   8   16.47    1.56
   7  -2   8   14.74    1.65
   7  -2   8   15.93    1.55
   7  -2   8   16.75    1.81
  -7   2  -8   17.39    1.72
  -7   2  -8   15.85    2.07
  -7   2  -8   14.87    1.48
  -7   2  -8   16.95    1.73
  -8   2   8   11.82    1.27
  -8   2   8   11.43    1.25
  -8   2   8   12.64    1.30
   8  -2  -8   11.84    1.23
   8  -2  -8   10.03    1.21
   9   2  -8   18.06    1.74
   9   2  -8   16.90    1.67
  -9   2   8   12.13    1.54
   0  -3  -8  151.39   10.68
   0   3   8  149.50   10.20
   0   3   8  154.76   10.45
   0  -3  -8  166.39   10.57
   0  -3  -8  145.73   10.66
   0   3   8  148.52   10.60
   0   3   8  161.99   10.23
   0   3   8  146.27   10.47
   0   3   8  159.01   10.44
   0   3   8  157.70   10.57
   0  -3  -8  157.87   10.04
   0   3   8  152.84   10.59
   0   3   8  144.03   10.55
   0  -3  -8  147.95   10.55
   0   3   8  152.74   10.29
   0   3   8  154.04   12.12
   0   3   8  151.17   10.06
   0   3   8  142.61   10.29
   0  -3  -8  146.80   10.39
   0   3   8  149.84   10.83
  -1   3   8  149.01   10.69
  -1   3   8  159.93   10.59
  -1   3   8  153.05   10.32
  -1   3   8  158.69   10.20
  -1   3   8  159.96   10.71
  -1   3   8  149.18   10.70
  -1   3   8  156.51   10.72
  -1   3   8  160.69   10.34
  -1   3   8  146.00   10.95
  -1   3   8  163.89   10.60
   1  -3  -8  155.12   10.71
   1  -3  -8  151.70   10.82
   1  -3  -8  152.44   10.53
   1  -3  -8  162.30   10.70
   1  -3  -8  149.96   10.17
   1  -3  -8  145.17   10.81
  -2  -3  -8   53.78    3.61
  -2  -3  -8   51.24    3.62
  -2   3   8   43.29    3.34
   2  -3   8   50.85    3.42
  -2   3   8   43.06    3.26
  -2  -3  -8   51.83    3.60
  -2   3   8   42.63    3.50
  -2   3   8   43.61    3.46
  -2  -3  -8   55.38    3.69
   2  -3   8   47.54    3.56
  -2   3   8   42.62    3.51
   2  -3   8   46.88    3.65
   2  -3   8   46.49    3.52
  -2  -3  -8   51.95    3.52
  -2   3   8   43.94    3.27
   2  -3   8   49.67    3.97
  -2  -3  -8   53.36    3.67
  -2   3   8   42.70    3.42
   2  -3   8   48.11    3.46
   2   3   8   52.92    3.65
   2  -3  -8   40.82    3.37
  -2   3  -8   48.01    4.13
  -2   3  -8   46.86    3.55
   2   3   8   56.54    3.68
  -2   3  -8   54.88    3.66
   2  -3  -8   42.41    3.54
  -2   3  -8   49.50    3.48
  -2   3  -8   49.84    3.55
   2   3   8   55.67    3.52
   2   3   8   53.24    3.69
  -2   3  -8   47.47    3.66
   2   3   8   54.41    4.20
   2   3   8   51.99    3.52
  -2   3  -8   46.33    3.36
   2   3   8   52.86    3.78
   2  -3  -8   45.51    3.50
  -2   3  -8   52.10    3.48
   2   3   8   52.36    3.60
   2  -3  -8   41.10    3.74
   2  -3  -8   41.13    3.36
   2   3   8   52.19    3.59
   3   3  -8   63.97    4.51
   3   3  -8   62.16    4.48
   3   3  -8   59.40    4.40
   3   3  -8   60.26    4.32
   3   3  -8   66.38    4.54
   3   3  -8   62.97    4.32
   3   3  -8   61.28    4.46
   3   3  -8   63.30    4.29
   3   3  -8   57.91    4.26
   3   3  -8   58.33    4.44
   3   3  -8   63.32    4.40
  -3  -3   8   63.87    4.37
  -3  -3   8   60.08    4.32
  -3  -3   8   60.28    4.33
  -3  -3   8   57.84    4.55
  -3  -3   8   59.78    4.51
  -3  -3   8   59.75    4.44
  -3  -3   8   59.99    4.49
  -3  -3   8   64.74    4.47
  -3  -3   8   63.34    4.51
  -3  -3   8   65.43    4.52
  -4  -3  -8  113.34    9.18
  -4  -3  -8  105.90    9.62
   4   3  -8  149.67    9.44
   4   3  -8  131.66    9.16
   4   3  -8  142.25    8.91
   4   3  -8  132.68    9.08
  -4  -3  -8  109.71    9.19
  -4  -3  -8  110.45    9.07
   4   3  -8  131.45    9.13
   4   3  -8  133.85    8.91
   4   3  -8  132.96    9.06
   4   3   8  106.89    9.16
  -4  -3   8  137.93    9.11
  -4  -3   8  136.17    9.39
  -4  -3   8  135.74    9.09
  -4  -3   8  146.37    9.19
  -4  -3   8  142.68    8.73
  -4  -3   8  133.39    8.89
  -4  -3   8  146.73    8.95
  -4  -3   8  137.06    8.85
   4   3   8  106.54   10.38
   4   3   8  108.99    9.09
  -4  -3   8  129.40    9.16
  -4  -3   8  132.04    9.32
  -4  -3   8  136.83    9.19
   5  -3   8   20.56    1.83
  -5   3   8   19.95    1.67
   5  -3   8   22.39    1.72
  -5   3   8   18.48    1.68
  -5   3   8   19.63    1.59
  -5   3   8   19.17    1.66
  -5   3   8   18.17    1.58
  -5   3   8   18.97    1.68
  -5   3   8   18.78    1.60
   5  -3   8   21.79    1.95
   5  -3   8   21.47    1.71
  -5   3  -8   22.32    1.75
  -5   3  -8   23.47    1.74
  -5   3  -8   20.31    1.78
  -5   3  -8   21.92    1.67
  -5   3  -8   20.91    1.95
   5  -3  -8   18.69    1.62
  -5   3  -8   21.36    1.80
   5  -3  -8   19.91    1.67
  -5   3  -8   20.01    2.21
   5  -3  -8   18.80    1.67
  -6  -3  -8   14.09    1.63
   6  -3   8   15.35    1.53
   6  -3   8   14.73    1.47
  -6  -3  -8   13.48    1.21
  -6  -3  -8   13.09    1.05
   6  -3   8   14.09    1.32
  -6   3  -8   14.51    1.42
   6   3   8   13.23    1.42
   6   3   8   13.13    1.40
  -6   3  -8   12.31    1.73
  -6   3  -8   14.20    1.43
  -6   3  -8   14.50    1.28
  -6   3  -8   14.93    1.63
   6   3   8   11.52    1.60
  -6   3  -8   15.82    1.48
   6   3   8   12.01    1.34
   6   3   8   13.60    1.53
   7   3  -8   43.61    3.60
  -7   3   8   57.07    3.68
   7   3  -8   39.81    3.70
   7   3  -8   39.93    3.65
  -7   3   8   58.47    4.27
   7   3  -8   41.72    3.71
  -7   3   8   57.89    3.74
  -7   3   8   55.41    3.61
   7  -3  -8   55.01    3.76
  -7  -3   8   42.04    3.86
  -7  -3   8   42.74    3.85
  -7  -3   8   43.92    3.48
  -8   3   8   11.78    1.44
  -8   3   8   12.15    1.27
  -8   3   8   12.03    1.25
  -8   3   8   11.70    1.25
  -8   3   8   11.49    1.23
   8  -3  -8   11.29    1.21
   8  -3  -8   11.49    1.26
   0  -4   8   44.10    3.20
   0   4  -8   45.04    3.25
   0  -4   8   45.83    3.30
   0  -4   8   45.76    3.29
   0   4  -8   45.76    3.24
   0   4  -8   43.72    3.28
   0   4  -8   46.39    3.72
   0  -4   8   44.31    3.36
   0  -4   8   44.33    3.63
   0   4  -8   48.54    3.39
   0  -4   8   45.73    3.18
   0  -4   8   43.96    3.32
   0   4  -8   44.31    3.30
   0   4  -8   47.52    3.17
   0  -4   8   44.55    3.30
   0   4  -8   42.89    3.14
   1   4  -8   83.43    6.19
   1  -4   8   88.24    5.63
   1   4  -8   75.65    5.47
   1  -4   8   83.34    5.70
   1  -4   8   90.44    5.54
  -1   4   8   71.79    5.25
   1   4  -8   81.36    5.42
   1  -4   8   83.16    5.58
   1   4  -8   79.49    5.48
  -1   4   8   70.17    5.56
  -1   4   8   66.87    5.27
   1   4  -8   79.90    5.56
  -1   4   8   67.29    6.40
   1   4  -8   77.38    5.29
   1   4  -8   80.27    5.70
   1  -4   8   90.49    5.40
  -1   4   8   65.33    5.53
  -1   4   8   74.25    5.50
  -1   4   8   73.68    5.48
  -1   4   8   70.00    5.70
  -1   4   8   68.54    5.24
   1   4  -8   77.31    5.56
   1  -4   8   84.12    6.17
   1   4  -8   81.24    5.52
   1   4  -8   77.45    5.54
  -1   4  -8   86.62    5.47
  -1  -4   8   78.63    5.39
   1  -4  -8   67.29    5.42
   1  -4  -8   72.96    5.52
   1  -4  -8   68.32    5.59
  -1   4  -8   85.37    6.39
  -1  -4   8   80.55    5.53
  -1  -4   8   80.88    5.29
  -1   4  -8   82.56    5.29
  -1   4  -8   89.41    5.49
  -1  -4   8   76.29    5.59
  -1  -4   8   74.65    5.58
  -1   4  -8   84.62    5.55
  -1  -4   8   77.98    5.56
  -1  -4   8   78.15    5.66
  -1   4  -8   85.17    5.56
  -1   4  -8   86.01    5.69
   1  -4  -8   70.74    5.53
  -1  -4   8   79.69    5.42
   2   4  -8  173.11   13.38
   2   4  -8  187.04   13.51
   2   4  -8  184.28   12.79
   2   4  -8  176.39   13.24
  -2   4   8  237.63   15.48
   2   4  -8  177.35   13.35
  -2   4   8  232.92   13.76
  -2   4   8  238.07   13.44
   2   4  -8  186.52   13.51
  -2  -4   8  186.38   13.45
   2  -4  -8  233.05   13.55
  -2  -4   8  181.64   13.20
  -2  -4   8  176.36   13.69
  -2  -4   8  186.15   13.04
  -2  -4   8  195.04   12.80
  -2  -4   8  178.35   13.54
  -2  -4   8  178.41   13.55
  -2  -4   8  194.00   13.39
   3   4  -8   82.20    5.85
   3   4  -8   78.94    5.68
   3   4  -8   86.45    5.79
  -3  -4  -8   71.77    5.87
  -3  -4  -8   75.95    5.77
   3   4  -8   87.04    5.88
   3   4  -8   83.60    5.79
  -3  -4  -8   76.23    5.95
   3   4  -8   84.42    5.86
  -3  -4   8   86.84    5.87
  -3  -4   8   89.53    5.93
  -3  -4   8   88.08    5.63
  -3  -4   8   81.16    5.93
  -3  -4   8   88.13    5.76
  -3  -4   8   85.83    5.93
   3   4   8   78.41    5.98
   3   4   8   77.01    6.79
   3   4   8   77.56    5.89
   3   4   8   76.00    5.76
  -3  -4   8   84.04    6.01
  -3  -4   8   80.82    5.85
  -3  -4   8   83.28    5.69
   3   4   8   78.75    6.01
  -3  -4   8   82.48    5.91
  -3  -4   8   83.14    5.71
   4  -4   8   35.60    3.34
  -4   4   8   43.08    2.86
   4  -4   8   36.09    2.98
   4   4  -8   39.80    3.08
   4  -4   8   39.31    2.97
   4   4  -8   44.11    2.96
   4   4  -8   38.61    3.03
   4   4  -8   39.40    2.93
  -4   4   8   42.72    2.98
  -4   4   8   42.41    3.08
  -4   4   8   40.84    2.98
   4   4  -8   39.47    3.01
   4   4  -8   42.08    3.08
  -4   4   8   40.79    3.59
  -4   4   8   43.35    2.94
   4  -4   8   36.62    3.08
  -4   4   8   42.98    3.02
  -4   4  -8   33.43    3.60
  -4   4  -8   38.37    3.03
  -4  -4   8   39.95    3.18
   4  -4  -8   43.05    2.98
  -4  -4   8   39.07    2.94
  -4  -4   8   40.72    3.10
  -4  -4   8   40.55    3.10
  -4   4  -8   34.83    2.85
   4  -4  -8   47.18    3.02
  -4  -4   8   40.33    3.10
  -4   4  -8   39.02    2.96
  -4   4  -8   36.81    3.24
  -4  -4   8   39.17    2.98
   4  -4  -8   46.91    2.90
  -4  -4   8   41.42    3.09
  -4   4  -8   36.84    3.02
   4  -4  -8   43.54    3.05
  -4  -4   8   40.73    3.07
   5   4  -8   10.18    0.97
   5   4  -8   10.27    1.01
   5   4  -8    9.68    1.01
   5   4  -8   10.62    1.04
  -5  -4   8   10.50    1.04
  -5  -4   8    8.97    1.07
  -5  -4   8   10.32    1.05
  -5  -4   8   10.50    1.06
  -5  -4   8   10.76    1.04
  -5  -4   8    9.51    1.00
  -5  -4   8    9.71    0.92
  -7   4   8   25.87    2.16
  -7   4   8   27.02    2.14
  -7   4   8   27.07    2.18
  -7   4   8   24.77    2.08
   7  -4  -8   25.37    2.18
   7  -4  -8   26.01    2.14
  -8   4   8   27.80    2.39
   8   4  -8   30.95    2.56
  -8   4   8   29.17    2.45
   8   4  -8   32.20    2.64
  -8   4   8   27.10    2.34
   8   4  -8   34.23    2.65
  -8   4   8   29.77    2.44
   8  -4  -8   27.66    2.41
   8  -4  -8   25.78    2.44
  -2   5   8   82.59    5.52
  -2   5   8   71.01    5.53
  -2   5   8   77.48    5.30
  -2   5   8   76.99    5.48
  -2   5   8   82.29    5.73
  -2   5   8   76.54    6.48
  -2   5   8   77.86    5.57
   2  -5  -8   84.62    5.55
   2  -5  -8   74.79    5.58
   2  -5  -8   79.28    5.62
   2  -5  -8   78.47    5.39
  -3  -5  -8   57.13    4.05
  -3  -5  -8   58.17    4.08
   3  -5   8   49.10    3.83
  -3  -5  -8   55.98    3.93
   3  -5   8   52.64    4.07
  -3  -5  -8   57.54    4.13
   3  -5   8   50.41    4.24
  -3   5  -8   47.25    4.56
  -3   5  -8   51.03    3.79
  -3   5  -8   48.97    3.88
   3   5   8   59.81    4.72
   3   5   8   57.16    3.83
   3   5   8   61.98    4.01
  -3   5  -8   48.29    4.05
  -3   5  -8   50.49    3.86
  -3   5  -8   48.31    3.80
  -3   5  -8   47.52    3.66
   3   5   8   61.14    4.07
   4  -5   8   59.42    4.47
   4  -5   8   57.49    4.38
  -4  -5  -8   65.81    5.01
  -4  -5  -8   64.77    4.57
  -4   5  -8   63.22    4.33
   4   5   8   65.13    5.32
  -4   5  -8   59.33    4.39
  -4   5  -8   55.46    5.24
  -4   5  -8   57.18    4.19
  -4   5  -8   58.49    4.69
  -4   5  -8   62.86    4.42
  -5  -5  -8   13.41    1.40
  -5  -5  -8   14.22    1.38
  -5  -5  -8   13.36    1.25
  -5  -5  -8   14.42    1.47
  -5  -5  -8   13.39    1.58
   5   5   8   12.86    1.41
   5   5   8   12.39    1.62
   5   5   8   13.51    1.36
   5   5   8   14.00    1.41
   5   5   8   13.99    1.30
   6  -5   8   15.31    1.43
   6   5  -8   15.08    1.46
   6   5  -8   15.85    1.42
  -6   5   8   15.81    1.36
  -6   5   8   17.16    1.45
  -6   5   8   16.69    1.34
   6   5  -8   15.86    1.53
   6   5  -8   15.28    1.49
  -6   5   8   18.12    1.44
  -6   5   8   16.48    1.38
   6  -5   8   14.88    1.56
  -6   5   8   17.90    1.47
  -6   5   8   16.10    1.40
  -6  -5   8   16.09    1.52
  -6   5  -8   14.35    1.48
  -6  -5   8   16.70    1.58
  -6  -5   8   15.07    1.61
  -6  -5   8   15.67    1.53
  -6  -5   8   16.37    1.51
  -6   5  -8   13.40    1.90
  -6   5  -8   17.06    1.51
  -6  -5   8   15.06    1.36
   6  -5  -8   18.01    1.48
  -6   5  -8   14.95    1.38
   6  -5  -8   15.88    1.38
   7  -5   8   19.87    1.99
   7  -5   8   19.46    1.81
  -7   5   8   20.36    1.71
  -7   5   8   21.00    1.75
  -7   5   8   20.19    1.73
  -7   5   8   22.40    1.85
  -7   5   8   21.32    1.69
  -7   5   8   23.56    1.78
   7  -5  -8   20.19    1.74
  -7   5  -8   20.58    1.90
  -7   5  -8   18.91    1.89
  -7   5  -8   18.58    1.71
  -7   5  -8   18.07    2.39
   7  -5  -8   21.34    1.82
  -8   5   8   30.76    2.54
  -8   5   8   31.53    2.48
  -8   5   8   32.22    2.56
   8  -5  -8   31.21    2.64
   8  -5  -8   32.18    2.58
   0   6  -8   76.24    4.93
   0  -6   8   68.60    4.62
   0   6  -8   64.08    4.69
   0  -6   8   67.29    4.86
   0   6  -8   66.90    5.40
   0  -6   8   63.26    4.78
   0   6  -8   70.43    4.73
   0  -6   8   65.10    4.79
   0  -6   8   68.15    4.78
   0   6  -8   62.86    4.53
   0  -6   8   62.41    4.61
   0   6  -8   65.53    4.75
   0   6  -8   65.29    4.78
  -1   6   8   32.44    2.84
   1  -6   8   42.59    2.74
   1  -6   8   42.69    2.81
  -1   6   8   32.88    3.29
  -1   6   8   33.27    2.79
  -1   6   8   32.53    2.80
  -1   6   8   31.92    2.72
  -1   6   8   32.59    2.66
   1  -6   8   41.66    2.61
   1  -6   8   39.05    2.74
  -1   6   8   34.68    2.76
   1  -6   8   41.98    2.74
   1  -6   8   38.95    2.82
  -1   6  -8   38.60    2.70
   1  -6  -8   31.38    2.67
  -1   6  -8   39.47    3.21
  -1   6  -8   40.31    2.73
  -1   6  -8   39.70    2.76
   1  -6  -8   32.88    2.74
   1  -6  -8   31.66    2.79
  -1   6  -8   42.37    2.82
  -1   6  -8   36.77    2.73
   1  -6  -8   31.00    2.78
  -1   6  -8   39.52    2.62
  -2   6   8   25.38    2.08
  -2   6   8   26.72    2.01
  -2   6   8   27.59    2.07
  -2   6   8   28.46    2.16
  -2   6   8   25.54    2.52
  -2   6   8   26.46    2.11
  -2   6   8   28.52    2.08
   2  -6  -8   27.81    2.12
   2  -6  -8   25.04    2.08
  -3  -6  -8   38.10    3.00
   3  -6   8   35.84    2.76
  -3  -6  -8   39.80    2.91
   3  -6   8   35.15    2.78
  -3  -6  -8   39.58    3.01
  -3  -6  -8   40.08    3.09
   3   6   8   40.47    3.53
  -3   6  -8   33.25    2.79
  -3   6  -8   36.02    2.78
  -3   6  -8   36.40    2.95
  -3   6  -8   34.25    2.73
  -3   6  -8   38.79    2.77
  -3   6  -8   34.01    2.63
  -3   6  -8   34.20    3.37
   3   6   8   42.07    2.95
   3   6   8   41.69    2.86
   3   6   8   38.31    2.68
  -4   6   8   23.60    2.36
  -4  -6  -8   24.84    2.12
  -4   6   8   25.82    1.95
  -4  -6  -8   23.39    2.13
  -4  -6  -8   25.18    2.19
  -4   6   8   25.05    1.93
  -4   6   8   22.73    1.89
  -4   6   8   24.81    1.92
  -4   6   8   24.19    1.82
  -4  -6  -8   23.02    1.99
  -4   6   8   22.68    1.84
   4  -6  -8   23.54    1.86
   4   6   8   23.51    1.88
   4   6   8   26.76    2.13
   4  -6  -8   24.14    1.94
   4   6   8   25.44    2.05
   4   6   8   23.84    2.50
   6   6  -8    8.79    0.97
   6   6  -8    8.33    0.91
   6   6  -8    8.78    1.02
   6   6  -8    9.85    1.09
  -6  -6   8    9.10    1.09
  -6  -6   8    8.93    1.15
  -6  -6   8    9.82    1.10
  -6  -6   8    8.80    0.93
  -6  -6   8    9.29    1.06
  -6  -6   8    9.89    1.14
  -8   6   8   11.28    1.12
  -8   6   8   10.46    1.13
   8  -6  -8   11.42    1.16
   8  -6  -8   11.35    1.23
   0   7   8   10.93    1.24
   0  -7   8   16.53    1.26
   0  -7  -8   11.36    1.27
   0  -7   8   16.66    1.28
   0  -7   8   16.38    1.25
   0   7  -8   16.46    1.25
   0   7   8   11.51    1.21
   0   7  -8   15.22    1.27
   0  -7   8   16.50    1.21
   0  -7   8   16.31    1.23
   0  -7  -8   11.10    1.23
   0   7  -8   15.87    1.23
   0   7   8   11.92    1.25
   0  -7  -8   12.22    1.25
   0  -7  -8   11.02    1.21
   0   7  -8   15.91    1.22
   0   7   8   11.16    1.55
   0   7  -8   17.33    1.44
   0   7  -8   16.07    1.24
   0   7   8   11.85    1.29
  -1   7   8   21.14    1.92
  -1   7   8   23.35    1.90
  -1  -7  -8   26.20    2.12
  -1  -7  -8   28.24    2.11
  -1   7   8   23.81    2.01
  -1  -7  -8   25.66    2.05
  -1  -7  -8   29.67    2.05
  -1   7   8   22.70    1.99
  -1  -7  -8   28.30    2.07
  -1   7   8   23.13    1.95
  -1   7   8   21.59    2.36
   1  -7  -8   23.72    1.94
   1  -7  -8   23.01    1.98
   1   7   8   25.55    2.52
   1   7   8   26.07    2.06
   1  -7  -8   21.23    1.95
   1   7   8   26.11    2.13
  -2   7   8   68.63    4.94
   2   7  -8   71.51    5.00
  -2   7   8   66.45    5.00
  -2   7   8   70.34    4.78
  -2   7   8   65.83    5.06
  -2   7   8   62.89    4.97
  -2   7   8   67.40    4.93
  -2   7   8   61.30    5.80
   2   7  -8   77.25    5.15
   2   7  -8   71.80    4.99
   2   7  -8   67.46    5.03
   2  -7  -8   68.77    5.04
  -2  -7   8   70.00    4.89
   2  -7  -8   64.93    5.02
  -2  -7   8   77.71    5.10
  -2  -7   8   70.59    5.14
  -2  -7   8   67.96    5.06
  -2  -7   8   74.04    4.91
  -2  -7   8   71.04    5.07
   4  -7   8   22.80    1.76
  -4   7  -8   21.75    1.76
  -4   7  -8   20.79    1.67
  -4   7  -8   19.90    2.29
  -4   7  -8   22.52    1.80
  -4   7  -8   23.58    2.03
  -4   7  -8   24.48    1.79
  -6   7   8   14.64    1.31
  -6   7   8   15.83    1.29
  -6   7   8   15.83    1.35
  -6   7   8   14.89    1.27
  -6   7   8   15.76    1.39
  -6   7   8   15.14    1.33
   6  -7  -8   15.82    1.34
   6  -7  -8   14.96    1.41
  -7   7   8    2.99    0.52
  -7   7   8    2.82    0.48
  -7   7   8    3.34    0.59
  -7   7   8    3.30    0.51
  -7   7   8    3.05    0.51
  -7   7   8    3.51    0.57
   7  -7  -8    3.43    0.60
   0   8  -8    7.85    0.92
   0   8  -8    7.60    0.78
   0  -8   8    7.37    0.75
   0   8  -8    8.03    0.80
   0   8  -8    7.45    0.78
   0  -8   8    6.93    0.75
   0  -8   8    8.34    0.82
   0   8  -8    7.94    0.83
   0   8  -8    7.01    0.76
   0  -8   8    7.45    0.78
   1  -8   8   31.04    2.16
  -1   8   8   23.96    2.27
  -1   8   8   28.03    2.28
  -1   8   8   26.16    2.75
  -1   8   8   26.61    2.31
  -1   8   8   26.58    2.18
   1  -8   8   30.75    2.25
  -1   8   8   26.01    2.25
   1  -8   8   31.34    2.22
  -1   8  -8   30.64    2.14
   1  -8  -8   26.14    2.30
  -1   8  -8   32.16    2.65
  -1   8  -8   32.28    2.22
  -1   8  -8   31.83    2.27
   1  -8  -8   25.88    2.28
   1  -8  -8   25.07    2.21
  -1   8  -8   31.11    2.21
  -1   8  -8   30.91    2.23
   3   8  -8   14.05    1.44
  -3   8   8   17.88    1.38
  -3   8   8   18.71    1.42
  -3   8   8   17.70    1.39
  -3   8   8   17.09    1.78
  -3   8   8   18.00    1.33
  -3   8   8   16.65    1.36
  -3  -8   8   12.75    1.40
  -3  -8   8   13.80    1.42
  -3  -8   8   13.42    1.45
   3  -8  -8   15.67    1.36
   3  -8  -8   16.52    1.37
  -3  -8   8   14.43    1.41
  -3  -8   8   12.72    1.40
  -3  -8   8   13.46    1.33
   4  -8   8   25.23    1.81
   4  -8   8   25.54    1.87
  -4   8  -8   23.96    2.42
  -4  -8   8   20.15    1.85
  -4   8  -8   23.43    1.70
  -4   8  -8   27.07    1.86
  -4  -8   8   20.96    1.95
  -4  -8   8   18.28    1.94
  -4   8  -8   24.61    1.79
  -4  -8   8   19.85    1.97
  -4  -8   8   20.06    2.05
  -4   8  -8   25.21    1.85
  -4  -8   8   19.48    1.96
   7   8  -8    7.32    0.89
  -7  -8   8    7.47    1.07
  -7  -8   8    7.92    1.12
   0   9  -8   12.21    1.13
   0   9  -8   12.00    1.14
   0   9  -8   13.41    1.22
   0  -9   8   11.50    1.12
   0  -9   8   12.48    1.10
   0   9  -8   12.14    1.14
   0  -9   8   12.66    1.15
  -2   9   8   88.31    6.46
  -2   9   8   97.35    6.53
  -2   9   8   93.00    6.24
  -2   9   8   88.04    6.53
  -2   9   8   89.94    7.64
   2   9  -8   91.17    6.62
  -2   9   8   89.63    6.53
   2   9  -8   95.89    6.59
  -2  -9   8   89.79    6.66
   2  -9  -8   89.75    6.60
   2  -9  -8   88.37    6.60
  -2  -9   8   89.87    6.66
  -2  -9   8   97.99    6.65
  -2  -9   8   90.58    6.41
  -3   9   8   57.78    3.92
  -3  -9  -8   46.42    4.35
  -3   9   8   58.50    4.13
  -3  -9  -8   48.23    4.43
  -3   9   8   65.21    4.20
  -3   9   8   62.68    4.16
   3   9  -8   54.93    4.31
  -3   9   8   60.61    4.98
  -3   9   8   60.92    4.13
   3  -9  -8   60.52    4.22
   3   9   8   50.56    5.11
   3  -9  -8   65.08    4.25
  -3  -9   8   47.96    4.25
  -3  -9   8   51.08    4.28
  -3  -9   8   52.89    4.28
  -4  -9  -8   12.41    1.51
  -4  -9  -8   12.61    1.47
  -4  -9  -8   14.18    1.59
  -4  -9   8   13.64    1.40
   4   9   8   13.19    1.85
  -4  -9   8   13.04    1.38
  -4  -9   8   13.44    1.41
  -4  -9   8   14.34    1.30
  -6   9   8    1.28    0.29
  -6   9   8    1.26    0.39
  -6   9   8    1.27    0.27
  -6   9   8    1.21    0.37
  -6  -9   8    1.80    0.55
  -6  -9   8    2.31    0.69
  -6  -9   8    2.35    0.63
  -2  10   8   30.38    2.48
  -2  10   8   30.77    2.48
  -2  10   8   33.22    2.52
  -2  10   8   32.29    2.51
  -2  10   8   30.08    3.00
  -2  10   8   31.17    2.37
   2 -10  -8   30.11    2.51
   2 -10  -8   30.08    2.48
   3  10  -8   19.58    1.67
   3 -10   8   15.85    1.41
  -3  10  -8   14.71    1.31
  -3 -10   8   17.82    1.60
  -3  10  -8   13.98    1.77
   3  10   8   11.76    1.95
  -3 -10   8   18.19    1.60
  -3  10  -8   14.96    1.31
  -3  10  -8   15.13    1.28
  -3 -10   8   17.14    1.58
  -3  10  -8   15.07    1.29
  -4 -10  -8   20.37    2.04
  -6 -10   8    8.01    1.16
   0 -11  -8    3.32    0.66
   0 -11  -8    2.83    0.59
   0  11   8    3.23    0.68
   0  11   8    3.02    0.64
   0  11   8    3.88    0.96
  -1  11   8   13.07    1.33
  -1  11   8   12.52    1.35
   1 -11  -8   11.84    1.33
   1 -11  -8   14.05    1.33
  -2  11   8   10.56    1.10
  -2  11   8   10.45    1.12
  -2  11   8   10.42    1.06
   2 -11  -8   10.29    1.14
   2 -11  -8   10.47    1.09
  -3  11   8   10.11    1.06
  -3  11   8   10.10    1.02
  -3  11   8   11.21    1.13
  -3  11   8   11.66    1.15
  -3  11  -8   10.38    0.92
  -3  11  -8   10.06    1.00
   3 -11  -8   10.15    1.14
  -3 -11   8   12.27    1.28
  -3  11  -8   11.25    1.51
  -3  11  -8   10.78    1.02
  -3 -11   8   12.40    1.29
  -3 -11   8   11.93    1.27
  -3  11  -8   12.28    0.95
  -5 -11   8    2.56    0.70
   0  12  -8    0.99    0.39
   0 -12   8    0.78    0.37
   0  12  -8    1.12    0.38
   0 -12   8    0.67    0.35
   1  12  -8    2.39    0.55
   1  12  -8    2.67    0.59
   1 -12   8    2.63    0.53
   1 -12   8    2.65    0.52
  -1  12  -8    2.41    0.45
  -1  12  -8    2.65    0.51
  -1 -12   8    2.49    0.56
  -1 -12   8    2.53    0.54
  -1  12  -8    2.86    0.51
   2  12  -8   13.36    1.45
   2 -12  -8   17.03    1.45
  -2 -12   8   13.29    1.44
  -2 -12   8   12.10    1.42
  -3 -12   8    3.05    0.70
  -3 -12   8    2.50    0.63
   0   0  -9  150.54   10.28
   0   0   9  153.15   10.46
   0   0  -9  150.63   10.46
   0   0   9  154.76    9.96
   0   0  -9  152.68   10.56
   0   0   9  152.19   11.92
   0   0   9  140.89   10.28
   0   0  -9  157.16   10.47
   0   0  -9  145.95    9.94
   0   0   9  149.76   10.73
   0   0   9  149.27   10.32
   0   0  -9  154.78   10.34
   0   0   9  149.81   10.56
   0   0  -9  152.18   10.45
   0   0  -9  150.47   10.55
   0   0   9  144.24   10.57
   0   0   9  148.38   10.46
   0   0  -9  151.43   10.33
   0   0   9  154.78   10.45
  -3   0  -9    9.50    0.99
  -3   0  -9    8.85    0.76
  -3   0   9   10.32    0.88
   3   0   9    8.75    1.10
  -3   0  -9    9.12    0.91
   3   0  -9   10.52    0.94
  -3   0  -9    8.56    0.91
   3   0   9    7.69    0.95
   3   0   9   10.11    1.03
   3   0  -9   10.93    0.89
  -3   0   9    9.26    0.94
   3   0  -9   11.28    0.94
   3   0   9    9.34    0.96
  -3   0   9   12.25    0.92
  -3   0  -9    9.48    0.98
   3   0   9    9.19    0.95
  -3   0   9   10.90    0.81
   3   0  -9   10.78    0.95
   3   0   9    9.65    0.95
  -3   0  -9    9.20    0.84
  -3   0   9    9.14    0.83
   3   0  -9   10.50    0.87
  -3   0   9   10.95    0.98
  -3   0   9   10.33    0.81
  -3   0  -9    9.01    1.04
  -3   0   9   11.48    0.91
   3   0  -9   10.65    0.98
  -3   0   9   10.40    0.94
  -3   0   9   10.72    0.91
   3   0  -9   10.90    0.94
   3   0   9    8.41    1.01
  -3   0   9   11.31    0.88
  -3   0   9    8.80    1.08
  -3   0  -9    8.78    0.77
  -3   0  -9    9.81    0.91
   3   0  -9    9.89    0.89
   5   0  -9   31.10    2.59
  -5   0   9   33.75    2.78
  -5   0   9   33.77    2.52
  -5   0   9   35.09    2.54
   5   0   9   42.67    2.74
  -5   0   9   32.45    2.68
   5   0  -9   36.35    2.57
  -5   0   9   31.49    2.69
   5   0  -9   30.50    2.62
  -5   0   9   32.87    2.57
   5   0  -9   33.79    2.63
   5   0  -9   33.82    2.54
  -5   0   9   33.60    2.65
  -5   0   9   32.61    2.56
  -6   0   9   31.67    2.53
  -6   0   9   30.90    2.56
   6   0  -9   30.26    2.51
  -6   0   9   31.52    2.66
   6   0  -9   29.36    2.46
   6   0  -9   31.47    2.39
  -6   0   9   32.43    2.46
   6   0  -9   29.17    2.46
  -6   0   9   31.50    2.46
   8   0  -9   70.28    5.31
   8   0  -9   71.20    5.29
   8   0  -9   67.71    5.33
  -8   0   9   70.41    5.42
   9   0  -9    5.98    0.95
   0  -1   9  352.13   22.59
   0   1  -9  326.80   22.26
   0  -1   9  320.52   22.86
   0   1  -9  334.45   21.52
   0   1  -9  333.11   22.83
   0   1  -9  334.89   22.59
   0  -1   9  328.24   22.31
   0  -1   9  319.69   22.85
   0   1  -9  334.54   22.59
   0   1  -9  333.38   22.35
   0   1  -9  323.75   22.28
   0   1  -9  329.05   22.62
   0   1  -9  324.94   22.83
   0  -1   9  307.33   23.09
   0  -1   9  341.72   25.72
   0   1  -9  336.14   22.36
   0  -1   9  338.45   22.34
   0  -1   9  322.39   22.66
   0  -1   9  335.59   22.58
  -1   1   9  164.77   10.34
  -1   1   9  165.01   10.71
  -1   1   9  166.74   10.64
  -1   1   9  156.02   12.39
  -1   1   9  150.78   10.64
  -1   1   9  149.06   11.09
  -1   1   9  154.61   10.90
  -1   1   9  148.43   10.49
  -1   1   9  160.02   10.84
  -1   1   9  144.21   10.79
  -1   1   9  159.28   10.94
   1  -1  -9  156.45   10.85
   1  -1  -9  152.90   10.95
   1  -1  -9  159.05   10.85
   1  -1  -9  153.34   10.68
   1  -1  -9  152.41   10.32
   1  -1  -9  165.88   10.85
   3  -1   9   10.30    1.15
   3  -1   9   10.28    1.09
   3  -1   9    9.73    0.95
   3  -1   9   10.73    0.99
   3  -1   9    9.80    0.98
   3  -1   9   10.05    1.04
  -3   1  -9   10.19    1.08
  -3   1  -9   11.85    0.91
  -3   1  -9   10.03    1.00
  -3   1  -9   10.55    1.04
  -3   1  -9   10.70    0.89
  -3   1  -9   10.82    0.99
  -3   1  -9   10.48    0.97
  -4   1   9   11.23    1.09
  -4   1   9   10.91    1.07
  -4   1   9   10.90    1.00
  -4   1   9   10.74    1.04
  -4   1   9   12.17    0.93
  -4   1   9   11.92    1.02
  -4   1   9   10.63    1.28
  -4   1   9   10.92    1.05
   4  -1  -9   11.80    0.99
   4  -1  -9   11.39    1.07
   4  -1  -9   11.92    1.05
   4  -1  -9   10.68    1.01
   4  -1  -9   10.58    1.05
   4  -1  -9   12.59    1.03
   5   1  -9   19.81    1.66
  -5  -1  -9   19.17    1.97
   5   1  -9   19.74    1.67
   5   1  -9   20.31    1.61
   5   1  -9   19.08    1.67
  -5  -1   9   20.40    1.52
  -5  -1   9   21.68    1.61
   5   1   9   17.88    1.99
  -5  -1   9   21.15    1.72
   5   1   9   19.49    1.75
   5   1   9   16.81    1.76
  -5  -1   9   18.94    1.73
   5   1   9   18.15    1.72
  -5  -1   9   19.05    1.65
  -5  -1   9   20.43    1.75
  -5  -1   9   22.16    1.63
  -5  -1   9   19.12    1.40
  -5  -1   9   19.32    1.40
   5   1   9   18.36    1.68
   6  -1   9   56.74    3.86
   6  -1   9   58.75    4.09
   6   1  -9   50.67    3.78
   6   1  -9   47.59    3.81
   6  -1   9   53.75    3.88
   6   1  -9   46.66    3.77
   6   1  -9   49.87    3.68
  -6   1  -9   57.30    4.09
  -6   1  -9   57.71    3.75
  -6   1  -9   53.30    4.73
  -6  -1   9   46.89    3.88
   6   1   9   40.73    4.35
   6   1   9   41.26    3.79
  -6  -1   9   50.03    3.97
  -6  -1   9   48.66    3.68
  -6  -1   9   49.07    3.82
   6   1   9   41.47    3.93
  -7   1   9   30.25    2.49
  -7   1   9   32.97    2.81
  -7   1   9   28.89    2.46
  -7   1   9   31.67    2.61
  -7   1   9   32.76    2.59
   7  -1  -9   27.88    2.53
   7  -1  -9   28.88    2.49
   7  -1  -9   33.04    2.56
   9   1  -9    0.35    0.40
   9  -1  -9    1.32    0.52
   0  -2  -9   88.00    6.33
   0   2   9   89.09    6.07
   0   2   9   91.71    6.07
   0   2   9   87.79    6.27
   0   2   9   90.98    6.18
   0  -2  -9   84.49    6.12
   0   2   9   87.01    6.04
   0  -2  -9   87.19    6.25
   0   2   9   88.23    6.29
   0  -2  -9   91.00    6.26
   0   2   9   85.11    6.43
   0   2   9   85.21    6.19
   0   2   9   84.75    6.09
   0  -2  -9   89.52    6.26
   0  -2  -9   88.64    6.31
   0   2   9   87.58    6.26
   0  -2  -9   90.14    5.95
   0   2   9   91.24    7.21
   0   2   9   88.34    5.97
  -1   2   9  113.36    6.97
  -1   2   9  105.22    7.06
  -1  -2  -9   89.54    7.35
  -1   2   9  108.40    7.31
  -1  -2  -9   91.58    7.30
  -1   2   9  118.12    7.09
  -1   2   9  110.85    7.32
  -1   2   9  113.00    7.22
  -1   2   9  111.38    8.42
  -1  -2  -9   95.56    7.33
  -1   2   9  110.23    7.22
  -1  -2  -9   95.92    7.41
  -1   2   9  112.32    7.31
  -1  -2  -9   92.47    7.17
  -1  -2  -9  100.56    7.19
  -1   2   9  109.88    7.09
  -1   2   9  115.96    7.24
  -1  -2  -9   95.57    7.30
  -1   2   9  112.73    7.52
  -1   2   9  109.81    7.04
  -1   2   9  111.40    7.34
   1   2   9   90.96    7.37
   1  -2  -9  112.40    7.19
   1   2   9   91.48    7.24
   1  -2  -9  105.26    7.38
   1   2   9   96.01    8.38
   1   2   9   95.92    7.39
   1   2   9   90.45    7.29
   1   2   9   97.68    7.37
   1   2   9  101.87    7.03
   1   2   9   99.24    7.34
   1   2   9   94.01    7.53
   1   2   9  100.69    7.14
   1  -2  -9  113.76    7.31
   1  -2  -9  106.75    6.96
   1  -2  -9  108.37    7.39
   1  -2  -9  115.75    7.33
   1   2   9  102.04    7.18
  -2   2   9   35.05    2.35
  -2   2   9   32.33    2.96
  -2   2   9   33.81    2.41
  -2   2   9   32.73    2.36
  -2   2   9   35.10    2.57
  -2   2   9   30.53    2.58
  -2   2   9   35.31    2.40
  -2   2   9   34.46    2.46
  -2   2   9   34.60    2.47
  -2   2   9   35.42    2.53
  -2   2   9   33.87    2.44
  -2   2   9   31.87    2.52
   2  -2  -9   32.58    2.41
   2  -2  -9   32.90    2.51
   2  -2  -9   35.27    2.54
   2  -2  -9   31.87    2.42
   2  -2  -9   34.98    2.73
   2  -2  -9   32.56    2.55
   2  -2  -9   31.06    2.50
  -3  -2  -9    9.21    0.93
   3  -2   9    9.31    1.07
   3  -2   9   10.18    1.05
   3  -2   9    9.05    0.88
   3  -2   9    9.41    0.89
   3  -2   9    9.74    0.98
   3  -2   9   10.06    0.95
  -3   2  -9    9.95    1.02
  -3   2  -9   10.49    0.99
  -3   2  -9    9.29    0.90
  -3   2  -9    9.28    1.01
  -3   2  -9   10.59    0.93
  -3   2  -9   10.19    0.97
   4   2  -9   41.32    2.96
   4   2  -9   37.44    2.92
   4   2  -9   45.83    3.08
   4  -2   9   31.74    2.90
   4  -2   9   34.78    3.31
   4  -2   9   35.33    2.90
   4   2  -9   39.89    2.93
   4  -2   9   35.80    2.90
   4   2  -9   42.51    2.87
   4   2  -9   38.62    2.96
   4  -2   9   34.79    3.03
  -4   2  -9   31.69    3.49
  -4   2  -9   35.08    2.96
  -4  -2   9   40.16    2.81
  -4  -2   9   42.08    2.88
  -4  -2   9   38.61    3.04
  -4  -2   9   39.92    2.90
  -4   2  -9   36.59    2.89
  -4  -2   9   41.48    2.99
  -4   2  -9   32.36    2.79
  -4  -2   9   42.40    3.05
  -4  -2   9   42.33    2.85
  -4  -2   9   41.00    2.96
  -4  -2   9   40.48    2.88
  -4   2  -9   34.97    2.96
  -4  -2   9   45.63    2.87
  -4  -2   9   41.76    3.01
  -4   2  -9   34.74    3.15
  -4  -2   9   43.76    2.99
   5   2  -9   62.66    4.63
   5   2  -9   62.37    4.47
   5   2  -9   60.22    4.59
   5   2  -9   60.11    4.55
  -5  -2   9   65.62    4.61
  -5  -2   9   59.95    4.35
  -5  -2   9   66.14    4.64
  -5  -2   9   57.71    4.69
  -5  -2   9   62.04    4.73
  -5  -2   9   62.18    4.49
  -5  -2   9   64.40    4.45
  -5  -2   9   63.35    4.59
  -5  -2   9   62.10    4.44
  -6   2   9   34.81    2.86
  -6   2   9   34.52    2.97
  -6   2   9   35.91    2.93
  -6   2   9   35.00    2.82
   6   2   9   43.93    3.65
   6   2   9   41.52    3.08
   6   2   9   42.96    3.28
   6   2   9   43.57    3.16
   6  -2  -9   34.84    2.90
   6  -2  -9   38.38    2.96
   6  -2  -9   34.41    2.95
   7   2  -9   32.17    2.77
   7   2  -9   31.60    2.73
   7   2  -9   31.31    2.72
   7   2  -9   33.11    2.66
   7   2   9   40.68    2.91
  -7  -2   9   32.57    2.86
  -7  -2   9   33.73    2.89
  -8   2   9   28.49    2.46
  -8   2   9   30.74    2.53
  -8   2   9   27.06    2.37
   8  -2  -9   28.22    2.42
   8  -2  -9   28.59    2.48
   9   2  -9    2.66    0.64
  -1  -3  -9   92.32    7.11
  -1  -3  -9   97.95    6.90
   1   3  -9  107.48    7.24
   1   3  -9  116.52    8.12
   1   3  -9  107.06    7.28
   1   3  -9  103.92    7.13
  -1  -3  -9  100.67    7.28
   1   3  -9  106.92    7.03
  -1  -3  -9   98.99    7.26
   1   3  -9  110.67    6.91
  -1  -3  -9   95.68    7.31
   1   3  -9  106.32    7.12
   1   3  -9  109.61    7.23
   1   3   9   96.76    7.48
   1   3   9   99.20    7.18
   1   3   9  105.58    7.09
  -1  -3   9  103.66    7.24
   1   3   9  107.10    7.00
  -1  -3   9  103.16    8.15
   1   3   9  102.47    7.34
   1   3   9  102.88    7.30
  -1  -3   9  105.72    7.08
  -1  -3   9  103.26    7.28
   1   3   9   90.30    7.07
   1   3   9  102.28    7.34
  -1  -3   9  116.54    7.24
  -1  -3   9  104.58    7.19
  -1  -3   9  101.78    7.01
  -1  -3   9  101.38    7.28
   1   3   9   98.84    7.21
   1   3   9   94.61    7.21
   1   3   9   94.93    7.29
   1   3   9   95.20    8.34
  -1  -3   9  109.82    7.40
  -2   3   9   29.40    2.09
  -2   3   9   25.11    2.47
  -2   3   9   24.54    2.14
  -2   3   9   26.45    2.10
  -2   3   9   27.80    2.13
  -2   3   9   28.35    1.91
  -2   3   9   26.66    2.03
  -2   3   9   27.32    1.92
  -2   3   9   29.27    2.03
  -2   3   9   26.51    1.89
   2  -3  -9   27.97    2.09
   2  -3  -9   26.63    1.99
   2  -3  -9   27.65    2.08
   2  -3  -9   27.40    2.13
   2  -3  -9   23.78    2.05
   2  -3  -9   27.32    2.30
  -3   3   9    7.83    0.84
  -3   3   9    8.13    0.81
  -3   3   9    8.28    0.78
  -3   3   9    7.74    0.76
  -3   3   9    6.73    0.97
  -3   3   9    7.75    0.81
  -3   3   9    8.10    0.83
  -3  -3  -9   10.54    0.99
   3  -3  -9    8.49    0.81
   3  -3  -9    9.28    0.75
   3  -3  -9    7.96    0.76
   3  -3  -9    7.45    0.76
   3  -3  -9    8.31    0.83
  -4  -3  -9   58.81    4.38
  -4  -3  -9   55.54    4.17
  -4  -3  -9   63.69    4.46
  -4  -3  -9   55.60    4.69
  -4  -3  -9   57.83    4.30
   4   3   9   54.94    4.42
   4   3   9   59.07    4.41
   4   3   9   60.23    4.32
   4   3   9   57.71    5.02
   4   3   9   57.88    4.34
  -5   3   9   35.05    2.66
  -5   3   9   35.20    2.73
  -5   3   9   35.40    2.80
   5  -3   9   37.35    2.76
  -5   3   9   35.99    2.73
   5   3  -9   27.81    2.81
   5  -3   9   37.51    2.94
  -5   3   9   34.40    2.63
  -5   3   9   36.95    2.79
  -5   3   9   37.05    2.61
   5  -3   9   35.13    2.78
   5  -3  -9   35.07    2.77
   5  -3  -9   33.69    2.69
  -5   3  -9   37.27    3.50
  -5   3  -9   38.06    2.89
  -5   3  -9   36.48    3.07
   5  -3  -9   37.03    2.76
  -5   3  -9   37.17    2.69
  -5   3  -9   36.18    2.88
   6  -3   9   27.20    2.43
   6  -3   9   26.99    2.27
   6  -3   9   29.13    2.28
  -6   3  -9   24.73    2.85
  -6   3  -9   26.62    2.19
  -6   3  -9   28.15    2.40
  -6   3  -9   28.52    2.42
   7   3  -9   34.65    2.93
   7   3  -9   35.85    2.97
   7   3  -9   39.35    2.91
   7   3  -9   34.51    2.97
  -7  -3   9   39.75    2.75
  -7  -3   9   36.28    3.08
  -7  -3   9   34.19    3.09
  -8   3   9    6.07    0.87
  -8   3   9    5.70    0.84
  -8   3   9    6.54    0.88
  -8   3   9    6.21    0.86
   8  -3  -9    6.26    0.89
   8  -3  -9    6.41    0.84
  -1  -4  -9   86.70    6.40
  -1  -4  -9   83.38    6.35
  -1  -4  -9   85.17    6.35
  -1  -4  -9   90.94    6.05
  -1  -4  -9   87.40    6.23
  -1  -4  -9   88.69    6.45
   1   4   9   89.03    7.37
   1   4   9   93.61    6.14
   1   4   9   97.73    6.49
   1   4   9   82.82    6.11
   1   4   9   94.65    6.37
   1   4   9   90.72    6.37
   1   4   9   90.35    6.11
   1   4   9   86.57    6.24
   1   4   9   87.59    6.58
   1   4   9   90.89    6.33
  -2   4   9   93.49    6.20
  -2   4   9   86.40    6.25
  -2   4   9   84.36    7.23
  -2   4   9   91.28    6.28
  -2   4   9   85.07    6.40
  -2   4   9   87.34    6.14
  -2   4   9   92.06    5.97
   2  -4  -9   86.50    6.08
   2  -4  -9   90.03    6.33
   2  -4  -9   81.52    6.27
   2  -4  -9   92.14    6.25
   4  -4   9   16.76    1.46
   4  -4   9   17.47    1.44
   4  -4   9   17.75    1.66
   4  -4   9   17.26    1.57
  -4   4  -9   17.87    1.67
  -4   4  -9   15.75    1.89
  -4   4  -9   18.03    1.54
  -4   4  -9   15.96    1.43
  -4   4  -9   18.12    1.55
  -4   4  -9   19.78    1.50
  -5   4   9   19.63    1.61
  -5   4   9   17.58    1.52
  -5   4   9   17.55    1.51
  -5   4   9   19.25    1.63
  -5   4   9   19.96    1.63
  -5   4   9   19.62    1.52
  -5   4   9   18.94    1.58
   5  -4  -9   18.11    1.60
   5  -4  -9   17.99    1.54
   6  -4   9   20.20    1.77
   6   4  -9   13.74    1.49
   6   4  -9   13.51    1.50
   6  -4   9   19.05    1.57
  -6  -4  -9   20.26    1.56
   6   4  -9   13.43    1.47
   6   4  -9   15.11    1.46
  -6  -4  -9   20.94    2.04
  -6  -4   9   14.00    1.37
  -6  -4   9   15.31    1.55
  -6  -4   9   15.28    1.56
  -6   4  -9   17.55    2.08
  -6   4  -9   18.72    1.54
   6   4   9   20.38    1.72
  -6  -4   9   13.05    1.58
  -6   4  -9   19.25    1.69
   6   4   9   20.19    1.85
  -6  -4   9   15.08    1.53
   6   4   9   21.50    1.81
  -6  -4   9   14.69    1.48
   6   4   9   20.26    2.11
  -6   4  -9   20.87    1.75
   7   4  -9   28.03    2.28
   7   4  -9   26.53    2.38
   7   4  -9   24.30    2.29
   7   4  -9   27.39    2.38
  -7  -4   9   27.97    2.23
  -7  -4   9   29.52    2.10
  -7  -4   9   28.25    2.54
  -8   4   9   23.25    2.05
  -8   4   9   25.26    2.14
  -8   4   9   23.60    2.09
  -8   4   9   27.00    2.15
   8  -4  -9   24.36    2.18
   8  -4  -9   22.98    2.08
   0  -5   9   45.12    3.16
   0  -5  -9   38.71    3.17
   0  -5  -9   36.30    3.20
   0   5   9   39.21    3.15
   0   5  -9   49.26    3.15
   0  -5   9   43.23    3.04
   0  -5   9   44.73    3.18
   0  -5   9   47.09    3.18
   0  -5  -9   37.08    3.19
   0   5  -9   46.12    3.11
   0   5  -9   49.59    3.27
   0   5   9   39.04    3.31
   0   5   9   39.27    3.21
   0  -5   9   47.40    3.04
   0   5   9   39.66    3.04
   0   5  -9   43.13    3.00
   0   5   9   37.21    3.13
   0   5   9   38.85    3.08
   0  -5   9   44.26    3.22
   0   5  -9   46.87    3.19
   0  -5  -9   38.00    3.08
   0   5   9   37.52    3.74
   0   5   9   36.94    3.21
   0   5  -9   45.06    3.15
   0   5  -9   48.78    3.57
  -1   5   9  130.31    8.99
  -1   5   9  126.56   10.35
  -1   5   9  131.58    8.56
  -1   5   9  126.66    8.98
  -1   5   9  125.23    9.19
  -1   5   9  130.96    8.87
  -1   5   9  129.22    8.87
   1  -5  -9  124.06    9.06
   1  -5  -9  132.22    8.98
   1  -5  -9  122.10    9.05
   1  -5  -9  127.43    8.81
  -2   5   9   48.14    3.58
  -2   5   9   47.29    3.48
  -2   5   9   42.95    3.43
  -2   5   9   50.98    3.45
  -2   5   9   45.37    4.09
  -2   5   9   48.38    3.42
  -2   5   9   46.52    3.30
   2  -5  -9   48.85    3.45
   2  -5  -9   47.03    3.50
   2  -5  -9   43.17    3.46
   2  -5  -9   46.44    3.32
  -3   5   9   25.07    1.85
  -3  -5  -9   23.65    2.07
  -3  -5  -9   22.97    1.97
  -3   5   9   24.09    1.87
  -3  -5  -9   25.00    2.13
  -3  -5  -9   23.60    2.04
  -3   5   9   23.07    1.92
  -3   5   9   23.35    2.34
  -3   5   9   24.55    1.97
  -3   5   9   23.37    1.97
  -3   5   9   23.82    1.91
   3   5   9   22.56    2.42
   3   5   9   24.31    1.89
   3  -5  -9   25.17    1.98
   3  -5  -9   25.73    1.91
   3   5   9   25.42    2.08
   3   5   9   26.66    2.05
   3  -5  -9   24.12    1.90
   5   5  -9   27.20    2.18
   5   5  -9   25.85    2.08
   5   5  -9   28.29    2.25
   5   5  -9   27.67    2.21
  -5  -5   9   27.72    2.22
  -5  -5   9   26.77    2.27
  -5  -5   9   25.92    2.21
  -5  -5   9   26.20    2.26
  -5  -5   9   27.12    2.12
  -5  -5   9   26.87    2.36
  -6   5   9   22.73    1.68
   6   5  -9   18.77    1.78
   6   5  -9   19.06    1.69
  -6   5   9   21.64    1.78
  -6   5   9   22.67    1.77
  -6   5   9   21.68    1.71
   6   5  -9   19.76    1.78
  -6   5   9   20.29    1.71
  -6   5   9   20.81    1.69
  -6  -5  -9   14.79    2.05
  -6   5   9   23.57    1.81
   6   5  -9   19.89    1.84
  -6  -5   9   20.11    1.88
   6  -5  -9   21.19    1.79
  -6  -5   9   21.08    1.71
  -6  -5   9   18.92    1.94
  -6  -5   9   20.06    1.81
  -6  -5   9   20.28    1.87
   6  -5  -9   21.54    1.71
   6   5   9   16.31    1.94
  -7   5   9   49.23    3.49
  -7   5   9   45.15    3.34
   7   5  -9   43.19    3.59
  -7   5   9   49.96    3.52
   7   5  -9   41.29    3.51
   7   5  -9   43.71    3.62
  -7   5   9   45.40    3.41
  -7  -5   9   42.34    3.78
   7  -5  -9   45.23    3.46
   7  -5  -9   46.67    3.56
  -7  -5   9   43.98    3.51
  -8   5   9   14.07    1.39
  -8   5   9   14.11    1.36
   8  -5  -9   13.64    1.38
   8  -5  -9   14.14    1.46
   0  -6  -9   59.48    5.25
   0   6   9   59.46    5.13
   0   6  -9   79.26    5.12
   0  -6   9   80.14    5.41
   0  -6   9   75.13    5.20
   0   6  -9   81.33    6.07
   0   6   9   62.26    5.33
   0   6  -9   81.53    5.37
   0  -6   9   79.34    5.47
   0   6   9   60.33    5.41
   0  -6   9   81.45    5.41
   0   6  -9   80.72    5.30
   0  -6   9   83.29    5.21
   0   6  -9   83.18    5.40
   1  -6   9   91.51    6.35
  -1  -6  -9   74.43    6.25
   1  -6   9   97.71    6.33
   1  -6   9   90.28    6.45
   1  -6   9   95.32    6.40
  -1   6  -9   87.01    6.29
  -1   6  -9   93.16    7.26
   1   6   9   71.03    7.37
  -1   6  -9   89.43    6.21
  -1   6  -9   93.22    6.32
  -1   6  -9   96.06    6.25
  -1   6  -9   87.97    6.00
   3   6  -9    9.64    1.00
   3   6  -9    9.46    0.81
   3   6  -9    9.94    0.74
   3   6  -9    9.23    0.75
   3   6  -9   10.04    0.90
   3   6  -9    9.57    0.93
  -3  -6   9    8.34    0.98
  -3  -6   9    9.45    0.95
  -3  -6   9    9.89    0.91
  -3  -6   9    9.88    1.00
  -3  -6   9    8.76    0.97
  -3  -6   9    8.90    0.96
   6   6  -9   19.16    1.63
   6   6  -9   17.94    1.58
   6  -6   9   12.76    1.41
   6  -6   9   14.06    1.59
   6   6  -9   16.90    1.49
   6   6  -9   17.96    1.46
  -6  -6   9   18.04    1.66
  -6  -6   9   18.21    1.61
  -6  -6   9   18.70    1.78
  -6   6  -9   13.12    1.47
  -6   6  -9   12.93    1.50
  -6   6  -9   11.79    1.91
  -6  -6   9   19.58    1.71
  -6  -6   9   18.30    1.48
  -7   6   9   28.50    2.24
  -7   6   9   28.08    2.20
  -7   6   9   29.36    2.32
  -7   6   9   29.73    2.33
   7  -6  -9   28.30    2.40
   7  -6  -9   27.93    2.30
   8   6  -9   22.19    2.06
   8   6  -9   21.52    2.09
  -8  -6   9   23.15    2.02
   0   7  -9   51.79    3.82
   0   7  -9   52.01    3.78
   0   7  -9   49.25    3.72
   0  -7   9   50.77    3.80
   0   7  -9   48.53    3.61
   0  -7   9   52.02    3.82
   0   7  -9   56.24    3.77
   0   7  -9   53.96    4.28
   0  -7   9   48.83    3.84
   0  -7   9   51.74    3.78
   0  -7   9   50.62    3.66
  -1   7   9   17.37    1.99
  -1   7   9   19.04    1.60
   1   7  -9   20.25    1.60
  -1   7   9   17.95    1.68
  -1   7   9   17.65    1.67
  -1   7   9   17.37    1.66
  -1   7   9   17.76    1.61
   1   7  -9   22.05    1.71
   1   7  -9   20.01    1.60
  -1   7   9   18.61    1.65
   1   7  -9   19.04    1.61
   1   7  -9   22.12    1.66
  -1  -7   9   21.07    1.67
   1  -7  -9   17.24    1.65
   1  -7  -9   16.82    1.62
  -1  -7   9   20.16    1.53
  -1  -7   9   19.08    1.61
   1  -7  -9   18.63    1.64
  -1  -7   9   20.46    1.65
  -1  -7   9   19.84    1.58
  -1  -7   9   21.32    1.67
   2   7  -9   36.97    2.55
   2  -7   9   26.78    2.36
   2   7  -9   36.33    2.49
   2  -7   9   28.51    2.42
  -2  -7   9   36.34    2.45
  -2   7  -9   27.06    2.35
  -2  -7   9   34.86    2.52
  -2   7  -9   28.29    2.40
  -2  -7   9   36.84    2.58
  -2   7  -9   26.27    2.35
  -2   7  -9   26.37    2.82
  -2   7  -9   25.60    2.31
  -2  -7   9   35.38    2.38
  -2  -7   9   36.02    2.52
  -3  -7  -9    2.60    0.56
  -3   7   9    4.44    0.57
  -3  -7  -9    2.40    0.58
  -3   7   9    2.84    0.51
  -3   7   9    3.51    0.51
  -3   7   9    3.41    0.55
   3  -7   9    5.29    0.56
  -3   7   9    2.51    0.46
  -3  -7  -9    2.67    0.61
  -3   7   9    3.19    0.72
  -3  -7  -9    2.68    0.64
  -3   7   9    3.15    0.51
  -3   7  -9    5.19    0.57
  -3   7  -9    4.50    0.53
  -3   7  -9    4.93    0.58
   3  -7  -9    2.92    0.52
  -3   7  -9    4.69    0.52
   3  -7  -9    4.47    0.57
  -3   7  -9    4.96    0.56
   3   7   9    4.01    0.91
  -3   7  -9    4.43    0.81
  -4  -7  -9   24.17    2.18
  -4  -7  -9   20.47    2.02
  -4  -7  -9   22.53    2.12
  -4  -7  -9   21.61    1.96
   4   7  -9   23.92    1.64
   4   7   9   22.69    1.86
   4   7   9   21.41    1.67
  -4  -7   9   22.91    1.97
  -4  -7   9   22.66    2.05
  -4  -7   9   23.10    2.00
  -4  -7   9   23.47    1.88
  -4  -7   9   23.75    2.02
   4   7   9   22.02    2.50
  -4  -7   9   23.52    1.96
   5  -7   9   47.96    3.84
   5  -7   9   43.18    3.69
   5   7  -9   54.57    3.61
   5   7  -9   57.69    3.73
  -5   7  -9   43.98    4.54
  -5  -7   9   52.85    3.95
  -5   7  -9   47.54    3.74
  -5  -7   9   55.04    3.97
  -5   7  -9   40.92    3.47
  -5   7  -9   47.51    3.67
  -5   7  -9   43.64    3.68
  -5  -7   9   53.29    3.75
  -5   7  -9   46.58    3.68
  -5  -7   9   51.41    3.89
  -5  -7   9   57.22    3.89
  -5  -7   9   56.24    4.10
  -6   7   9   24.22    2.06
  -6   7   9   25.93    2.13
   6   7  -9   28.71    2.15
  -6   7   9   23.14    2.02
  -6   7   9   25.19    2.04
  -6   7   9   25.33    1.96
  -6   7   9   25.02    1.97
   6  -7  -9   24.45    2.15
  -6  -7   9   26.33    2.28
  -6  -7   9   28.82    2.50
   6  -7  -9   24.61    2.04
  -6  -7   9   26.34    2.33
  -7   7   9   21.03    1.75
  -7   7   9   21.37    1.64
  -7   7   9   19.62    1.63
  -7   7   9   19.33    1.68
   7   7  -9   19.53    1.78
  -7  -7   9   18.36    1.86
   7  -7  -9   18.94    1.81
   7  -7  -9   19.08    1.70
  -7  -7   9   20.20    2.11
  -7  -7   9   20.21    1.96
   1   8  -9   29.51    2.37
   1   8  -9   32.12    2.48
   1   8  -9   31.89    2.39
   1   8  -9   29.12    2.35
  -1  -8   9   30.17    2.30
  -1  -8   9   27.36    2.36
  -1  -8   9   30.61    2.40
  -1  -8   9   30.07    2.39
  -2   8   9   38.07    2.92
  -2   8   9   38.69    2.90
  -2   8   9   38.52    2.94
  -2   8   9   36.91    2.87
  -2   8   9   36.38    3.48
  -2   8   9   37.47    2.78
   2  -8  -9   36.20    2.93
   2  -8  -9   38.11    2.94
   3   8  -9    6.83    0.86
  -3  -8   9    6.88    0.82
  -3  -8   9    6.36    0.74
  -3  -8   9    6.51    0.83
  -3  -8   9    6.00    0.80
  -3  -8   9    7.02    0.86
  -3  -8   9    6.30    0.85
  -4   8   9    4.59    0.90
  -4   8   9    4.20    0.58
  -4   8   9    4.40    0.62
  -4   8   9    4.58    0.60
   4  -8   9    3.32    0.56
  -4   8   9    4.99    0.59
  -4   8   9    5.32    0.61
  -4   8  -9    3.80    0.57
  -4   8  -9    3.83    0.58
   4  -8  -9    4.31    0.60
   4  -8  -9    4.74    0.64
  -4   8  -9    3.55    0.83
  -4   8  -9    2.97    0.48
  -4   8  -9    3.26    0.52
  -5   8   9   13.91    1.24
   5  -8   9   13.91    1.27
  -5   8   9   13.73    1.24
  -5   8   9   13.39    1.21
  -5   8   9   14.31    1.30
  -5   8   9   13.33    1.17
  -5   8  -9   16.14    1.34
  -5   8  -9   13.63    1.24
   5  -8  -9   14.05    1.26
   5  -8  -9   13.85    1.32
  -5   8  -9   13.38    1.16
  -5   8  -9   12.80    1.75
  -5   8  -9   13.35    1.23
  -5   8  -9   13.21    1.32
   6  -8   9   10.73    1.12
  -6   8  -9   10.18    1.60
  -6   8  -9   11.05    1.06
  -6   8  -9   10.95    1.18
   7   8  -9    7.42    0.90
  -7  -8   9    7.31    1.05
  -7  -8   9    7.88    1.12
   0  -9   9   24.11    2.02
   0  -9   9   24.31    1.95
   0  -9   9   22.95    2.00
   0   9  -9   22.21    1.97
   0   9  -9   24.05    2.01
   0   9   9   30.13    2.20
   0   9  -9   23.10    2.00
   0   9   9   31.10    2.28
   0   9  -9   24.40    2.07
   1  -9   9   16.32    1.41
   1  -9   9   17.15    1.42
   1  -9   9   16.22    1.35
  -1   9  -9   16.67    1.43
  -1   9  -9   16.01    1.68
  -1   9  -9   16.15    1.39
  -1   9  -9   15.12    1.34
  -1   9  -9   14.69    1.37
  -1   9  -9   16.78    1.40
  -2   9   9   16.35    1.40
  -2   9   9   15.92    1.47
  -2   9   9   14.88    1.44
  -2   9   9   15.80    1.44
  -2   9   9   15.37    1.83
  -2   9   9   17.03    1.49
   2  -9  -9   17.00    1.49
   2  -9  -9   15.81    1.49
  -3   9   9   44.95    3.15
  -3   9   9   44.19    3.83
  -3   9   9   43.23    2.97
  -3   9   9   47.45    3.19
  -3   9   9   42.88    3.09
   3  -9   9   35.27    3.04
   3  -9   9   38.14    3.11
  -3   9   9   44.97    3.14
   3  -9  -9   41.97    3.17
  -3   9  -9   34.03    3.67
  -3   9  -9   34.83    2.99
  -3  -9   9   46.63    3.31
  -3   9  -9   34.48    3.01
  -3   9  -9   36.43    3.00
  -3  -9   9   49.17    3.34
   3  -9  -9   44.02    3.18
  -3   9  -9   34.55    3.00
  -4  -9  -9   12.29    1.48
  -4  -9  -9   12.76    1.48
  -5   9  -9   22.49    1.77
  -5  -9   9   22.79    2.19
  -5   9  -9   23.73    1.86
  -5   9  -9   26.26    2.00
  -5   9  -9   25.30    2.06
  -5  -9   9   24.76    2.08
  -5   9  -9   25.18    2.66
  -5  -9   9   24.56    2.25
  -5  -9   9   22.69    2.20
  -6   9   9   28.98    2.35
  -6   9   9   29.57    2.43
  -6   9   9   31.15    2.19
   1 -10   9   17.92    1.49
  -1 -10  -9   13.85    1.62
   1 -10   9   18.10    1.50
  -1 -10  -9   12.92    1.61
   1  10   9   14.12    1.70
  -1  10  -9   19.57    1.84
  -1  10  -9   17.47    1.47
  -1  10  -9   17.25    1.48
  -1  10  -9   19.49    1.55
   1  10   9   14.33    2.02
  -1  10  -9   18.27    1.49
  -2  10   9    5.97    0.78
  -2  10   9    6.57    0.82
  -2  10   9    6.41    1.13
  -2  10   9    5.84    0.78
   2 -10  -9    6.35    0.80
   2 -10  -9    5.65    0.81
  -3 -10   9    6.66    0.88
  -3 -10   9    6.87    0.90
   3  10   9    3.91    1.22
  -3 -10   9    7.54    0.94
   1  11  -9   16.17    1.37
  -1  11   9   10.85    1.34
  -1  11   9   11.58    1.31
  -1 -11   9   15.44    1.38
   1 -11  -9   11.55    1.30
   1 -11  -9   10.20    1.32
  -1 -11   9   15.74    1.37
   2  11  -9    7.12    0.94
  -2 -11   9    6.56    0.89
  -2 -11   9    6.64    0.92
  -3  11  -9    2.28    0.47
  -3  11  -9    2.97    0.78
  -3  11  -9    2.52    0.42
  -3  11  -9    2.45    0.45
  -4 -11   9    0.93    0.47
  -4 -11   9    0.85    0.47
   0 -12   9    2.13    0.50
   0  12  -9    1.71    0.47
   0 -12   9    1.65    0.46
   0  12  -9    1.79    0.46
   1  12  -9    2.33    0.52
   1  12  -9    2.03    0.54
  -1 -12   9    1.38    0.47
  -1 -12   9    2.12    0.55
   2 -12   9    3.67    0.66
  -2  12  -9    3.78    0.59
  -2  12  -9    3.68    0.56
  -3 -12   9    1.27    0.52
   0   0  10    0.66    0.25
   0   0 -10    0.22    0.19
   0   0  10    0.66    0.24
   0   0 -10    0.22    0.15
   0   0  10    0.52    0.23
   0   0  10    0.29    0.20
   0   0 -10    0.52    0.20
   0   0  10    0.62    0.25
   0   0  10    0.83    0.32
   0   0 -10    0.24    0.22
   0   0  10    0.23    0.18
   0   0 -10    0.37    0.17
   0   0 -10    0.25    0.16
   0   0  10    0.09    0.19
   0   0  10    0.19    0.14
   0   0 -10    0.49    0.21
  -2   0  10  156.17   10.72
  -2   0  10  160.41   10.13
   2   0 -10  154.54   10.68
   2   0 -10  149.00   10.75
   2   0 -10  161.41   10.69
  -2   0  10  150.36   10.31
  -2   0  10  142.63   10.87
   2   0 -10  144.19   10.72
   2   0 -10  153.52   10.62
  -2   0  10  153.67   10.62
  -2   0  10  150.10   12.15
   2   0 -10  145.60   10.46
  -2   0  10  155.00   10.49
  -2   0  10  153.73   10.75
  -2   0  10  146.70   10.61
   2   0 -10  152.81   10.15
  -2   0  10  158.06   10.54
  -2   0  10  154.71   10.43
  -2   0  10  145.06   10.43
   2   0 -10  163.46   11.10
  -2   0  10  165.56   10.68
  -3   0  10    1.79    0.37
   3   0 -10    2.24    0.39
   3   0 -10    2.16    0.36
   3   0 -10    2.55    0.42
  -3   0  10    2.79    0.39
   3   0 -10    3.26    0.47
  -3   0  10    2.38    0.30
   3   0 -10    2.33    0.40
  -3   0  10    2.54    0.51
  -3   0  10    2.05    0.29
   3   0 -10    2.49    0.40
  -3   0  10    2.14    0.34
   3   0 -10    2.11    0.38
   3   0 -10    2.43    0.39
  -3   0  10    2.06    0.40
  -3   0  10    1.94    0.36
  -3   0  10    2.56    0.39
  -3   0  10    2.28    0.33
  -3   0  10    2.43    0.38
   4   0 -10   67.31    4.93
  -4   0  10   69.85    4.77
  -4   0  10   68.73    4.94
  -4   0  10   68.52    4.91
   4   0 -10   65.20    4.97
  -4   0  10   69.23    4.74
  -4   0  10   73.65    4.72
   4   0 -10   71.37    4.77
   4   0 -10   71.34    4.82
  -4   0  10   63.25    5.03
   4   0 -10   72.65    5.20
  -4   0  10   66.92    4.87
   4   0 -10   61.03    4.90
  -4   0  10   68.64    4.97
  -4   0  10   65.13    4.63
  -4   0  10   66.42    4.82
  -4   0  10   67.34    4.64
  -4   0  10   67.17    4.72
   5   0 -10   92.54    6.44
  -5   0  10   90.03    6.43
   5   0 -10   85.41    6.42
  -5   0  10   85.55    6.55
  -5   0  10   90.84    6.18
   5   0 -10   93.13    6.29
   5   0 -10   83.90    6.45
  -5   0  10   91.87    6.34
   6   0 -10   11.96    1.27
   6   0 -10   12.95    1.28
  -6   0  10   12.70    1.27
  -6   0  10   12.04    1.30
  -6   0  10   14.52    1.42
  -6   0  10   13.83    1.33
   6   0 -10   14.67    1.25
   6   0 -10   13.27    1.27
   7   0 -10   12.26    1.28
   7   0 -10   11.04    1.21
   7   0 -10   11.96    1.27
  -7   0  10   12.26    1.33
  -7   0  10   13.20    1.45
  -7   0  10   11.98    1.31
   8   0 -10    3.04    0.65
   8   0 -10    3.44    0.68
  -8   0  10    3.49    0.73
   8   0 -10    2.84    0.63
   9   0 -10    2.69    0.70
   0  -1 -10  139.71    8.94
   0  -1  10  110.62    8.72
   0  -1  10  115.12   10.09
   0  -1 -10  144.67    8.96
   0  -1  10  109.86    8.88
   0   1 -10  114.82    8.77
   0   1 -10  114.32    8.94
   0   1  10  143.19    8.94
   0   1  10  135.79    8.78
   0   1  10  143.94    9.02
   0   1  10  145.86    8.53
   0  -1 -10  141.40    9.03
   0   1  10  136.27    8.90
   0  -1  10  118.39    8.88
   0  -1  10  120.78    8.47
   0   1  10  139.99    8.94
   0   1  10  140.74   10.23
   0  -1 -10  144.75    8.95
   0  -1 -10  136.87    8.77
   0   1 -10  111.62    8.84
   0   1 -10  115.08    8.89
   0   1  10  141.95    9.03
   0  -1 -10  143.76    9.05
   0   1 -10  108.18    8.67
   0   1  10  137.77    8.67
   0   1 -10  112.04    8.93
   0  -1  10  112.70    8.96
   0   1 -10  109.17    8.75
   0  -1  10  119.98    8.88
   0   1  10  147.94    8.85
   0   1 -10  110.28    8.67
   0   1 -10  113.84    8.46
   0   1  10  137.27    9.19
   0   1 -10  118.81    8.89
   1   1 -10   75.80    4.91
   1   1 -10   74.85    5.16
   1   1 -10   73.16    4.96
   1   1 -10   71.75    5.13
   1   1 -10   71.55    5.10
   1   1 -10   68.41    5.14
   1   1 -10   70.02    4.98
   1   1 -10   70.34    5.08
  -1  -1  10   75.29    5.12
  -1  -1  10   75.16    4.86
  -1  -1  10   71.25    5.24
  -1  -1  10   68.14    5.09
  -1  -1  10   72.78    5.10
  -1  -1  10   67.18    5.11
  -1  -1  10   71.58    5.16
  -1  -1  10   71.53    4.99
  -1  -1  10   69.58    5.80
  -1  -1  10   64.62    4.92
   2   1 -10   49.56    3.77
   2   1 -10   49.13    3.74
   2   1 -10   53.13    3.81
  -2  -1 -10   54.17    3.85
  -2  -1 -10   52.81    3.88
  -2  -1 -10   55.49    3.86
   2   1 -10   51.92    3.65
  -2  -1 -10   49.69    3.75
   2   1 -10   49.36    3.74
  -2  -1 -10   53.51    3.65
   2   1 -10   51.95    3.84
  -2  -1 -10   50.06    3.66
   2   1 -10   48.08    3.65
   2   1 -10   49.47    3.77
  -2  -1 -10   57.12    3.69
  -2  -1 -10   52.56    3.80
  -2  -1  10   47.36    3.72
  -2  -1  10   49.54    3.74
  -2  -1  10   48.59    3.84
   2   1  10   52.77    3.91
  -2  -1  10   51.44    3.64
   2   1  10   53.10    4.40
  -2  -1  10   50.82    3.65
  -2  -1  10   50.95    3.81
  -2  -1  10   53.42    3.58
   2   1  10   52.26    3.88
  -2  -1  10   48.61    3.63
   2   1  10   53.96    4.02
  -2  -1  10   50.89    3.77
   2   1  10   51.76    3.82
  -2  -1  10   48.14    4.28
  -2  -1  10   54.09    3.70
   2   1  10   51.60    3.75
  -3   1  10   19.64    1.45
  -3   1  10   18.92    1.49
  -3   1  10   20.54    1.67
  -3   1  10   20.50    1.56
  -3   1  10   20.64    1.62
  -3   1  10   19.45    1.52
  -3   1  10   18.70    1.54
  -3   1  10   18.80    1.65
  -3   1  10   18.57    1.92
  -3   1  10   19.98    1.62
  -3   1  10   20.35    1.55
   3  -1 -10   19.66    1.56
   3  -1 -10   19.01    1.59
   3  -1 -10   20.92    1.56
   3  -1 -10   19.14    1.52
   3  -1 -10   18.18    1.61
   3  -1 -10   20.77    1.74
   3  -1 -10   20.16    1.62
   3  -1 -10   19.19    1.61
  -4   1  10   60.45    4.16
  -4   1  10   60.59    4.35
  -4   1  10   53.70    4.45
  -4   1  10   58.40    4.27
  -4   1  10   61.46    4.43
  -4   1  10   63.62    4.28
  -4   1  10   59.92    5.13
  -4   1  10   58.77    4.36
   4  -1 -10   56.02    4.35
   4  -1 -10   62.39    4.26
   4  -1 -10   57.87    4.42
   4  -1 -10   62.44    4.23
   4  -1 -10   62.08    4.41
   6   1  10   11.96    1.34
   6   1  10   11.65    1.30
  -6   1 -10   15.74    1.85
   6   1  10   11.98    1.28
   6   1  10   10.79    1.50
   6   1  10   10.94    1.37
  -7   1  10   12.57    1.24
  -7   1  10   12.20    1.24
  -7  -1 -10    7.76    1.54
  -7   1  10   12.44    1.21
   7   1  10    7.92    1.17
   7  -1 -10   12.12    1.20
   7  -1 -10   11.95    1.16
   7   1  10    8.55    1.16
   7   1  10    8.43    1.41
   7  -1 -10   10.67    1.17
  -8   1  10    8.08    1.07
   8   1 -10    7.68    0.99
   8   1 -10    6.61    1.00
   8   1 -10    7.64    1.01
   8  -1 -10    7.23    0.97
   8  -1 -10    8.02    1.02
   8  -1 -10    6.69    0.97
  -8  -1  10    7.61    1.06
   0   2  10   65.08    4.47
   0   2  10   65.21    4.55
   0   2  10   62.65    5.21
   0   2  10   62.03    4.34
   0   2  10   63.53    4.45
   0   2  10   62.32    4.50
   0   2  10   58.14    4.42
   0  -2 -10   65.83    4.54
   0  -2 -10   60.37    4.38
   0  -2 -10   62.28    4.54
   0   2  10   63.02    4.31
   0  -2 -10   64.33    4.52
   0   2  10   61.08    4.66
   0  -2 -10   59.69    4.48
   0   2  10   63.65    4.33
   0   2  10   60.62    4.51
   0  -2 -10   58.39    4.53
   0   2  10   59.43    4.35
   0   2  10   60.51    4.51
   0  -2 -10   61.23    4.29
   1   2 -10  137.22    8.44
  -1   2  10  122.55    8.08
   1   2 -10  137.81    8.47
  -1   2  10  116.70    8.36
  -1   2  10  113.26    8.47
  -1   2  10  120.74    8.48
  -1  -2 -10   98.36    8.47
   1   2 -10  137.07    8.40
   1   2 -10  135.70    8.26
  -1   2  10  113.14    8.49
  -1   2  10  112.92    8.23
  -1   2  10  110.52    8.20
   1   2 -10  136.63    8.57
  -1   2  10  116.42    9.72
  -1   2  10  115.54    8.16
  -1   2  10  113.31    8.68
   1   2 -10  137.16    8.30
  -1   2  10  121.07    8.37
  -1   2  10  114.54    8.46
   1   2  10   98.96    8.47
  -1  -2  10  136.29    8.57
  -1  -2  10  130.14    8.49
   1  -2 -10  117.98    8.57
  -1  -2  10  136.65    8.59
   1  -2 -10  114.64    8.06
   1  -2 -10  118.99    8.45
   1  -2 -10  112.10    8.32
   1   2  10  102.12    8.30
  -1  -2  10  131.05    8.23
   1  -2 -10  116.25    8.47
   1  -2 -10  106.19    8.53
  -1  -2  10  135.11    8.69
  -2  -2 -10   89.23    6.52
  -2  -2 -10   82.48    6.25
  -2  -2 -10   94.60    6.30
  -2  -2 -10   91.03    6.42
  -2  -2 -10   88.51    6.46
  -2  -2 -10   87.36    6.11
  -2  -2 -10   89.70    6.43
   2   2  10   85.30    7.36
   2   2  10   94.49    6.55
   2   2  10   89.75    6.70
   2   2  10   88.63    6.52
   2   2  10   88.41    6.44
   2   2  10  100.24    6.35
   2   2  10   88.09    6.33
   3   2 -10   50.55    3.57
   3   2 -10   46.17    3.43
   3   2 -10   53.53    3.65
   3   2 -10   49.29    3.58
   3  -2  10   47.13    3.54
   3  -2  10   44.09    3.63
   3  -2  10   42.98    4.01
   3  -2  10   46.30    3.50
   3   2 -10   47.26    3.52
   3  -2  10   46.85    3.74
   3   2 -10   51.14    3.45
   3  -2  10   45.52    3.58
   3   2 -10   52.26    3.62
   3   2 -10   46.67    3.55
  -3   2 -10   46.46    3.42
  -3  -2  10   47.95    3.58
  -3  -2  10   48.60    3.45
  -3  -2  10   48.99    3.42
  -3   2 -10   46.58    3.65
  -3  -2  10   50.27    3.61
  -3   2 -10   48.87    3.62
  -3  -2  10   49.12    3.67
  -3  -2  10   49.50    3.45
  -3   2 -10   43.63    3.73
  -3  -2  10   47.85    3.43
  -3   2 -10   46.40    3.56
  -3   2 -10   47.33    3.51
  -3  -2  10   45.58    3.52
  -3  -2  10   50.03    3.57
  -3  -2  10   48.67    3.47
  -3  -2  10   48.27    3.57
   4   2 -10   56.28    4.02
   4   2 -10   49.75    3.90
   4   2 -10   50.12    3.87
   4   2 -10   50.43    3.75
   4   2 -10   51.85    3.87
  -4  -2  10   52.96    3.80
  -4  -2  10   54.85    3.92
  -4  -2  10   50.81    3.83
  -4  -2  10   53.31    3.78
  -4  -2  10   53.30    3.90
  -4  -2  10   53.28    3.91
  -4  -2  10   49.62    3.98
  -4  -2  10   51.75    3.73
  -4  -2  10   54.84    3.79
   5   2 -10  149.54   10.90
  -5   2  10  151.46   10.39
   5   2 -10  158.97   10.73
  -5   2  10  157.81   10.73
   5   2 -10  144.59   11.01
   5   2 -10  143.04   10.96
  -5   2  10  161.16   10.94
  -5   2  10  157.27   11.13
  -5   2  10  158.44   10.87
  -5   2  10  167.40   10.37
  -5   2  10  161.68   10.82
   5  -2 -10  151.88   11.01
  -5  -2  10  163.93   10.96
  -5  -2  10  162.87   11.01
  -5  -2  10  160.48   11.34
  -5  -2  10  153.33   10.83
  -5  -2  10  137.60   11.14
  -5  -2  10  158.71   10.60
  -5  -2  10  147.74   10.60
   5  -2 -10  166.99   10.97
  -5  -2  10  157.88   10.99
  -5  -2  10  151.55   10.46
   5  -2 -10  151.83   10.94
   6  -2  10   33.15    2.92
   6  -2  10   35.20    3.38
   6  -2  10   35.76    3.14
   6  -2  10   33.65    2.96
   6   2  10   42.98    3.15
   6   2  10   41.37    3.11
   6   2  10   43.40    3.29
   6   2  10   42.03    3.64
  -6   2 -10   36.07    2.88
  -6   2 -10   35.76    3.14
  -6   2 -10   31.98    3.64
  -7   2  10   22.78    2.02
  -7   2  10   24.83    2.04
   7  -2  10   24.15    2.05
  -7   2  10   22.80    1.95
  -7   2  10   23.10    1.96
   7  -2  10   24.18    2.09
   7   2  10   17.85    2.02
   7  -2 -10   23.38    2.01
   7  -2 -10   22.46    1.95
   7  -2 -10   22.94    2.02
  -7   2 -10   23.80    2.72
   7   2  10   18.12    2.39
  -8   2  10   16.06    1.58
  -8   2  10   15.86    1.55
   8   2 -10   13.00    1.53
   8   2 -10   13.45    1.52
  -8   2  10   17.94    1.63
   8   2 -10   14.41    1.54
   8  -2 -10   15.48    1.58
   8  -2 -10   15.57    1.52
   8  -2 -10   15.05    1.56
   0  -3  10   63.17    4.49
   0  -3  10   64.06    4.75
   0   3 -10   65.61    4.44
   0   3 -10   60.03    4.60
   0   3 -10   64.57    4.36
   0   3 -10   65.88    4.57
   0  -3  10   62.26    4.66
   0   3 -10   65.95    4.57
   0   3 -10   61.96    4.35
   0   3 -10   65.56    4.56
   0  -3  10   63.13    4.50
   0   3 -10   64.72    4.64
   0  -3  10   62.16    4.66
   0  -3  10   67.02    4.63
   0   3 -10   68.73    4.69
   0  -3  10   63.73    4.63
   0  -3  10   63.75    5.17
   0   3 -10   62.00    4.55
   0   3 -10   63.07    4.46
  -1  -3 -10   58.51    4.15
  -1  -3 -10   57.91    4.28
  -1  -3 -10   58.18    4.06
  -1  -3 -10   58.89    4.26
  -1  -3 -10   58.18    4.32
   1   3  10   60.22    4.26
   1   3  10   57.60    4.96
   1   3  10   61.06    4.28
   1   3  10   58.53    4.20
   1   3  10   53.07    4.08
   1   3  10   54.41    4.41
   1   3  10   56.92    4.26
  -2  -3 -10   52.56    4.09
  -2  -3 -10   53.08    4.02
  -2  -3 -10   51.38    3.91
  -2  -3 -10   52.91    4.04
   2   3  10   50.11    3.89
   2   3  10   52.13    4.20
   2   3  10   51.69    4.65
   2   3  10   53.20    4.05
   2   3  10   61.79    3.97
   2   3  10   56.16    4.04
   2   3  10   53.55    4.11
   2   3  10   60.98    4.15
   3  -3  10   25.67    2.18
   3  -3  10   26.05    2.12
   3  -3  10   27.64    2.08
   3  -3  10   26.02    2.37
   3  -3  10   24.80    2.21
   3  -3  10   26.22    2.08
  -3   3 -10   27.27    2.15
  -3   3 -10   24.49    2.55
  -3   3 -10   29.30    2.20
  -3   3 -10   26.58    2.06
  -3   3 -10   26.34    2.24
  -3   3 -10   28.88    2.11
  -3   3 -10   26.65    2.20
   4   3 -10  105.81    6.69
   4   3 -10   92.58    6.45
  -4   3  10   76.98    6.38
   4   3 -10   96.07    6.52
  -4   3  10   84.91    6.10
   4   3 -10   90.79    6.32
  -4   3  10   79.64    7.45
  -4   3  10   80.37    6.56
   4   3 -10   97.33    6.56
  -4   3  10   85.05    6.45
  -4   3  10   83.57    6.31
  -4   3  10   84.38    6.38
  -4  -3  10   96.35    6.57
  -4  -3  10  100.50    6.36
   4  -3 -10   89.90    6.28
  -4  -3  10  103.57    6.39
  -4  -3  10   86.88    6.44
   4  -3 -10   88.66    6.46
  -4  -3  10   98.36    6.34
  -4  -3  10   99.85    6.53
   4  -3 -10   79.93    6.50
  -4  -3  10   96.74    6.55
   4  -3 -10   79.33    6.42
  -4  -3  10   94.34    6.67
  -5   3  10   89.90    7.12
  -5   3  10   95.09    7.36
   5   3 -10  115.52    7.66
  -5   3  10   99.91    7.52
  -5   3  10   93.71    7.45
  -5   3  10   98.41    7.43
   5   3 -10  115.28    7.62
   5   3 -10  118.28    7.41
  -5   3  10   91.84    7.62
  -5   3  10   96.58    7.11
   5   3 -10  114.39    7.56
   5  -3 -10   90.44    7.48
   5  -3 -10   89.48    7.55
  -5  -3  10  118.95    7.56
   5  -3 -10   98.35    7.52
  -5  -3  10  120.51    7.37
  -5  -3  10  117.49    7.65
  -5  -3  10  120.18    7.40
  -5  -3  10  121.99    7.68
  -5  -3  10  109.24    7.78
   6  -3  10   30.72    2.53
   6  -3  10   32.66    2.53
   6  -3  10   33.16    2.74
   6   3  10   32.68    2.83
  -6   3 -10   28.87    3.16
   6   3  10   28.51    2.64
  -6   3 -10   32.59    2.69
  -6   3 -10   31.40    2.46
   6   3  10   26.83    2.55
   6   3  10   28.47    3.06
  -8   3  10    2.13    0.59
  -8   3  10    2.33    0.57
  -8   3  10    2.59    0.61
   8  -3 -10    2.53    0.60
   8  -3 -10    2.14    0.53
   0  -4 -10   63.89    4.27
   0   4  10   64.76    4.35
   0   4  10   62.35    4.54
   0  -4 -10   59.67    4.46
   0  -4 -10   60.62    4.37
   0  -4 -10   60.17    4.53
   0   4  10   56.58    4.61
   0   4  10   60.23    4.25
   0   4  10   61.29    5.23
   0  -4 -10   59.83    4.51
   0   4  10   59.85    4.40
   0   4  10   62.77    4.53
   0   4  10   64.76    4.45
   0   4  10   58.91    4.42
   0   4  10   61.45    4.39
  -1  -4 -10   24.74    2.13
  -1  -4 -10   24.37    2.08
  -1  -4 -10   28.38    2.06
  -1  -4 -10   24.36    2.08
   1   4  10   26.09    1.90
   1   4  10   27.85    2.00
   1   4  10   26.03    2.20
   1   4  10   27.24    2.12
   1   4  10   25.80    2.54
   1   4  10   25.42    2.05
   1   4  10   27.63    2.08
   1   4  10   24.48    2.23
   1   4  10   23.89    1.90
  -2   4  10    9.29    1.30
  -2   4  10   10.80    1.06
   2   4 -10   13.93    1.15
   2   4 -10   13.52    1.15
   2   4 -10   12.45    1.11
  -2   4  10   11.47    1.13
  -2   4  10    9.70    1.11
   2   4 -10   12.56    0.99
   2   4 -10   13.01    1.07
  -2   4  10   10.25    1.08
  -2   4  10   12.81    1.09
   2   4 -10   12.60    1.02
  -2   4  10   11.22    1.10
   2   4 -10   12.84    1.10
  -2  -4  10   13.76    1.15
  -2  -4  10   14.02    1.13
   2  -4 -10   10.76    1.02
  -2  -4  10   13.28    1.12
  -2  -4  10   13.16    1.14
   2  -4 -10   11.65    1.10
  -2  -4  10   12.84    1.04
   2  -4 -10    9.50    1.06
  -2  -4  10   12.54    1.16
   2  -4 -10    9.70    1.09
  -2  -4  10   13.57    1.10
   3   4 -10   12.61    1.12
   3   4 -10   13.56    1.22
   3   4 -10   13.18    1.17
   3   4 -10   13.83    1.30
   3   4 -10   12.31    1.11
   3   4 -10   13.73    1.22
   3   4 -10   13.00    1.18
   3   4 -10   13.54    1.19
  -3  -4  10   12.37    1.20
  -3  -4  10   12.78    1.11
  -3  -4  10   13.16    1.18
  -3  -4  10   13.70    1.21
  -3  -4  10   11.98    1.23
  -3  -4  10   12.97    1.22
  -3  -4  10   13.74    1.24
  -3  -4  10   13.00    1.22
  -4   4  10   13.59    1.24
   4   4 -10   13.63    1.24
   4   4 -10   14.68    1.28
  -4   4  10   13.40    1.28
   4   4 -10   15.39    1.22
  -4   4  10   12.76    1.54
   4   4 -10   13.64    1.17
   4   4 -10   13.49    1.21
  -4   4  10   14.10    1.27
  -4   4  10   13.02    1.18
  -4   4  10   15.44    1.23
  -4   4  10   12.95    1.23
  -4  -4  10   13.29    1.27
  -4  -4  10   14.78    1.29
  -4  -4  10   14.92    1.19
  -4  -4  10   12.31    1.31
  -4  -4  10   13.27    1.18
  -4  -4  10   14.78    1.32
   4  -4 -10   13.10    1.18
  -4  -4  10   12.27    1.24
   4  -4 -10   11.83    1.22
   4  -4 -10   13.71    1.24
  -5   4  10   40.17    2.75
  -5   4  10   43.34    2.72
  -5   4  10   39.97    2.82
  -5   4  10   42.75    2.88
  -5  -4 -10   29.54    2.69
  -5  -4 -10   29.35    2.81
  -5  -4 -10   30.61    2.91
  -5   4  10   39.66    2.90
  -5   4  10   42.20    2.90
   5  -4 -10   39.05    2.88
   5  -4 -10   40.61    2.79
   5   4  10   30.33    3.41
   5   4  10   30.62    2.83
   5   4  10   33.70    3.06
   5   4  10   30.82    2.90
   6   4 -10   27.67    2.18
  -6   4  10   21.25    2.05
   6   4 -10   26.48    2.25
  -6  -4 -10   31.24    2.26
   6   4 -10   28.23    2.32
  -6   4  10   21.01    2.19
  -6   4  10   21.28    2.15
   6   4 -10   25.46    2.25
   6   4  10   29.06    2.44
   6   4  10   31.14    2.60
   6   4  10   31.46    2.97
   6   4  10   30.93    2.52
  -6  -4  10   30.43    2.34
  -6  -4  10   26.27    2.41
  -6  -4  10   29.05    2.34
  -6  -4  10   27.42    2.24
  -6  -4  10   29.06    2.13
  -8   4  10   25.58    2.21
  -8   4  10   28.05    2.30
  -8   4  10   26.20    2.26
  -8   4  10   25.88    2.22
   8  -4 -10   25.12    2.23
   8  -4 -10   26.41    2.34
   0   5 -10   88.12    5.86
   0  -5  10   78.99    5.94
   0  -5  10   78.54    5.71
   0  -5  10   84.08    5.75
   0  -5  10   79.69    6.03
   0   5 -10   82.69    5.63
   0   5 -10   76.94    5.86
   0   5 -10   83.34    5.93
   0   5 -10   87.14    6.06
   0  -5  10   80.06    5.94
   0   5 -10   80.79    5.80
   0   5 -10   89.03    6.69
   0  -5  10   86.08    5.93
  -1   5  10   45.61    3.09
  -1   5  10   41.54    3.21
  -1   5  10   45.18    3.17
  -1   5  10   40.20    3.76
  -1   5  10   41.33    3.22
  -1   5  10   40.16    3.29
  -1   5  10   44.74    3.18
   1  -5 -10   40.66    3.15
   1  -5 -10   40.84    3.22
   1  -5 -10   41.65    3.23
   1  -5 -10   41.05    3.10
   2   5 -10   21.04    1.66
   2   5 -10   20.06    1.67
  -2  -5 -10   15.57    1.66
   2   5 -10   21.53    1.42
   2   5 -10   21.69    1.67
  -2  -5 -10   17.25    1.64
  -2  -5 -10   17.47    1.75
   2   5 -10   22.77    1.78
   2   5 -10   21.53    1.59
  -2  -5 -10   17.54    1.71
   2   5 -10   21.37    1.43
   2   5 -10   22.05    1.66
   2   5 -10   21.09    1.51
   2   5  10   17.80    1.60
  -2  -5  10   19.10    1.66
   2   5  10   17.97    1.81
  -2  -5  10   20.41    1.72
   2   5  10   19.01    1.72
   2   5  10   17.24    2.05
  -2  -5  10   22.05    1.71
  -2  -5  10   19.94    1.62
   2   5  10   18.74    1.70
  -2  -5  10   20.86    1.58
  -3   5  10    9.73    0.93
  -3   5  10    9.30    0.98
  -3   5  10   10.21    0.99
  -3   5  10    9.07    1.23
  -3   5  10    9.77    0.94
  -3   5  10    9.90    1.01
  -3   5  10    9.65    0.97
   3  -5 -10    8.76    0.92
   3  -5 -10   10.27    1.00
   3  -5 -10   11.82    1.01
   4   5 -10   31.78    2.37
   4   5 -10   36.46    2.53
   4   5 -10   33.98    2.51
   4   5 -10   36.24    2.47
   4  -5  10   26.70    2.51
  -4  -5  10   34.61    2.58
  -4  -5  10   35.14    2.44
  -4   5 -10   27.79    2.47
  -4   5 -10   26.42    2.60
  -4   5 -10   26.21    2.33
  -4  -5  10   32.14    2.52
  -4   5 -10   27.16    2.46
  -4   5 -10   27.43    2.40
  -4  -5  10   36.01    2.54
  -4  -5  10   33.37    2.64
  -4  -5  10   33.22    2.55
   5  -5  10   18.92    1.68
   5  -5  10   19.78    1.79
  -5   5 -10   17.21    2.15
  -5   5 -10   18.54    1.73
  -5   5 -10   21.77    1.95
  -5   5 -10   18.86    1.62
  -5   5 -10   19.48    1.74
   6  -5  10    7.88    1.04
   6  -5  10    6.32    0.85
  -6   5 -10    7.63    0.89
  -6   5 -10    8.20    0.98
  -6   5 -10    6.52    0.93
  -6   5 -10    6.39    1.26
  -7   5  10   25.76    2.11
  -7   5  10   23.78    2.06
   7   5 -10   25.48    2.20
  -7   5  10   24.69    2.07
   7   5 -10   23.69    2.14
  -7   5  10   23.49    2.02
   7   5 -10   25.93    2.26
  -7  -5  10   25.75    2.14
   7  -5 -10   23.47    2.15
  -7  -5  10   25.12    2.39
   7  -5 -10   23.72    2.06
   8   5 -10    3.55    0.69
   8   5 -10    3.82    0.79
   8   5 -10    3.56    0.82
   0   6 -10  162.54   10.88
   0  -6  10  153.23   11.08
   0  -6  10  165.74   10.78
   0   6 -10  166.85   12.48
   0   6 -10  151.70   10.95
   0  -6  10  157.73   11.22
   0  -6  10  170.48   11.04
   0  -6  10  149.70   10.66
   0   6 -10  145.77   10.43
   0  -6  10  152.55   11.08
   0   6 -10  156.87   10.85
   0   6 -10  158.84   10.99
   1   6 -10   65.37    4.43
   1   6 -10   60.77    4.43
   1   6 -10   61.65    4.49
   1   6 -10   60.06    4.37
   1   6 -10   62.56    4.88
   1   6 -10   60.96    4.26
  -1  -6  10   58.97    4.51
[truncated: 161,359 more chars]
