# Supplementary material
Source: MDPI journal article supplement (https://www.mdpi.com/2304-6740/11/10/417)
Supplement: s1 [file s1 › Supplementary data.pdf]

# Synthesis, X-ray Structures and Hirshfeld Analysis of Two Novel Thiocyanate-Bridged Ag(I) Coordination Polymers

Mezna Saleh Altowyan <sup>1</sup>, Eman M. Fathalla <sup>2,\*</sup>, Jörg H. Albering <sup>3</sup>, Morsy A. M. Abu-Youssef <sup>2,\*</sup>, Taher S. Kassem <sup>2</sup>, Assem Barakat <sup>4</sup>, Matti Haukka <sup>5</sup>, Ahmed M. A. Badr <sup>2</sup> and Saied M. Soliman <sup>2,\*</sup>

<sup>1</sup> Department of Chemistry, College of Science, Princess Nourah bint Abdulrahman University, P.O. Box 84428, Riyadh 11671, Saudi Arabia; msaltowyan@pnu.edu.sa

<sup>2</sup> Department of Chemistry, Faculty of Science, Alexandria University, Ibrahimia, P.O. Box 426, Alexandria 21321, Egypt; taher.kassem.2011@gmail.com (T.S.K.); ahmed\_badr@alexu.edu.eg (A.M.A.B.)

<sup>3</sup> Graz University of Technology, Mandellstr. 11/III, A-8010 Graz, Austria; joerg.albering@tugraz.at

<sup>4</sup> Department of Chemistry, College of Science, King Saud University, P.O. Box 2455, Riyadh 11451, Saudi Arabia; ambarakat@ksu.edu.sa

<sup>5</sup> Department of Chemistry, University of Jyväskylä, P.O. Box 35, FI-40014 Jyväskylä, Finland; matti.o.haukka@jyu.fi

\* Correspondence: eman.nomeir@alexu.edu.eg (E.M.F.); morsy5@alexu.edu.eg (M.A.M.A.-Y.); saied1soliman@yahoo.com or saeed.soliman@alexu.edu.eg (S.M.S.)

**Table. S1.** Crystal data and structure refinement for complexes **1** and **2**.

|                                         | <b>1</b>                                                                                                                   | <b>2</b>                                                                                                                                           |
|-----------------------------------------|----------------------------------------------------------------------------------------------------------------------------|----------------------------------------------------------------------------------------------------------------------------------------------------|
| <b>CCDC</b>                             | 2298037                                                                                                                    | 2298038                                                                                                                                            |
| <b>Empirical formula</b>                | C <sub>13</sub> H <sub>9</sub> Ag N <sub>2</sub> O S                                                                       | C <sub>14</sub> H <sub>10</sub> Ag N <sub>3</sub> O S <sub>2</sub>                                                                                 |
| <b>Formula weight</b>                   | 349.15 g/mol                                                                                                               | 408.24 g/mol                                                                                                                                       |
| <b>Temperature</b>                      | 100(2) K                                                                                                                   | 293(2) K                                                                                                                                           |
| <b>Wavelength</b>                       | 0.71073 Å                                                                                                                  | 0.71073 Å                                                                                                                                          |
| <b>Crystal system</b>                   | Orthorhombic                                                                                                               | Triclinic                                                                                                                                          |
| <b>Space group</b>                      | <i>P n a 2<sub>1</sub></i>                                                                                                 | <i>P -1</i>                                                                                                                                        |
| <b>Unit cell dimensions</b>             | a = 27.2079(9) Å<br>b = 6.0833(2) Å<br>c = 7.5732(2) Å<br>$\alpha = 90^\circ$<br>$\beta = 90^\circ$<br>$\gamma = 90^\circ$ | a = 6.0975(2) Å<br>b = 8.7626(4) Å<br>c = 14.6204(6) Å<br>$\alpha = 95.010(2)^\circ$<br>$\beta = 100.1270(10)^\circ$<br>$\gamma = 90.578(2)^\circ$ |
| <b>Volume</b>                           | 1253.47(7) Å <sup>3</sup>                                                                                                  | 765.80(5) Å <sup>3</sup>                                                                                                                           |
| <b>Z</b>                                | 4                                                                                                                          | 2                                                                                                                                                  |
| <b>Density (calculated)</b>             | 1.850 g/cm <sup>3</sup>                                                                                                    | 1.770 g/cm <sup>3</sup>                                                                                                                            |
| <b>Absorption coefficient</b>           | 1.761 mm <sup>-1</sup>                                                                                                     | 1.589 mm <sup>-1</sup>                                                                                                                             |
| <b>F(000)</b>                           | 688                                                                                                                        | 404                                                                                                                                                |
| <b>Crystal size</b>                     | 0.10 x 0.16 x 0.21 mm <sup>3</sup>                                                                                         | 0.18 x 0.23 x 0.45 mm <sup>3</sup>                                                                                                                 |
| <b>Theta range for data collection</b>  | 3.00 to 30.57°                                                                                                             | 1.42 to 25.00°                                                                                                                                     |
| <b>Index ranges</b>                     | -36 ≤ h ≤ 38, -7 ≤ k ≤ 8, -10 ≤ l ≤ 10                                                                                     | -7 ≤ h ≤ 7, -10 ≤ k ≤ 10, -17 ≤ l ≤ 17                                                                                                             |
| <b>Reflections collected</b>            | 12897                                                                                                                      | 12502                                                                                                                                              |
| <b>Independent reflections</b>          | 3773 [R(int) = 0.0273]                                                                                                     | 1060 [R(int) = 0.0314]                                                                                                                             |
| <b>Completeness to theta = 30.57°</b>   | 99.8%                                                                                                                      | 39.1%                                                                                                                                              |
| <b>Absorption correction</b>            | Multiscan                                                                                                                  | Multiscan                                                                                                                                          |
| <b>Max. and min. transmission</b>       | 0.8410 and 0.7040                                                                                                          | 0.7630 and 0.5350                                                                                                                                  |
| <b>Refinement method</b>                | Full-matrix least-squares on F <sup>2</sup>                                                                                | Full-matrix least-squares on F <sup>2</sup>                                                                                                        |
| <b>Data / restraints / parameters</b>   | 3773 / 1 / 163                                                                                                             | 1060 / 0 / 190                                                                                                                                     |
| <b>Goodness-of-fit on F<sup>2</sup></b> | 0.971                                                                                                                      | 1.238                                                                                                                                              |
| <b>Final R indices [I &gt; 2σ(I)]</b>   | R1 = 0.0228, wR2 = 0.0580                                                                                                  | R1 = 0.0143, wR2 = 0.0382                                                                                                                          |
| <b>R indices (all data)</b>             | R1 = 0.0244, wR2 = 0.0589                                                                                                  | R1 = 0.0144, wR2 = 0.0382                                                                                                                          |
| <b>Largest diff. peak and hole</b>      | 0.549 and -0.778                                                                                                           | 0.159 and -0.163                                                                                                                                   |
